# Supplementary material for: Gut metagenome associations with extensive digital health data in a volunteer-based Estonian microbiome cohort
Source: Research Square preprint supplement (doi:10.21203/rs.3.rs-929392/v1), 2021-10-04
Supplement: Supplementary file 2 [file 618d56e5b2cc8874191b368e.xlsx]

## Sheet: Sheet1
	Intrinsic (5)	Diseases (71)	Medications (136)	Dietary factors (21)	Procedures (5)	Other (14)	Total number of factors associated (252)
Associations with species-level alpha diversity - Observed species	4	19	5	4	3	4	39
Associations with species-level alpha diversity - Shannon index	4	7	0	6	0	3	20
Associations with functional-level alpha diversity - observed KOs	2	5	1	6	0	2	16
Species-level beta diversity	5	29	12	16	4	9	75
Functional-level beta diversity	5	39	23	14	2	7	90
Number of factors having association with any of the microbial diversity metrics	5	46	27	17	4	10	109
Univariate associations with species	-	16	18	11	-	-	45
Univariate associations with species - AB adjusted*	-	13	-	-	-	-	13
Univariate associations with KEGG KOs	-	14	6	4	-	-	24
Univariate associations with KEGG Kos - AB adjusted*	-	9	-	-	-	-	9
Number of factors having association with any of the microbiome features	5	50	47	20	4	10	136
