# Supplementary material for: Gut metagenome associations with extensive digital health data in a volunteer-based Estonian microbiome cohort
Source: Research Square preprint supplement (doi:10.21203/rs.3.rs-929392/v1), 2021-10-04
Supplement: Supplementary file 4 [file a31631bea6ce177582249e59.xlsx]

## Sheet: AUROC
Disease	AUROC (MB only)	AUROC (Null)	AUROC (Null+MB)	AUROC (Null+AB)	AUROC (Null+MB+AB)
Type 2 diabetes mellitus (E11)	0.823402	0.856422	0.887463	0.862108	0.889538
Age-related cataract (H25)	0.705277	0.955299	0.952882	0.955063	0.952882
Hypertensive heart disease (I11)	0.664418	0.884859	0.884649	0.884945	0.884649
Gout (M10)	0.625977	0.838119	0.824276	0.856685	0.827268
Menopausal and other perimenopausal disorders (N95)	0.622842	0.923243	0.921068	0.922435	0.920043
Acute appendicitis (K35)	0.618175	0.629198	0.631851	0.638954	0.62601
Essential (primary) hypertension (I10)	0.608857	0.815378	0.817333	0.820344	0.818755
Cholelithiasis (K80)	0.605044	0.732463	0.714481	0.729879	0.714481
Disorders of lipoprotein metabolism and other lipidemias (E78)	0.601567	0.812888	0.817201	0.813516	0.817201
Polyosteoarthritis (M15)	0.595725	0.851368	0.839971	0.855482	0.842981
Candidiasis (B37)	0.581818	0.756683	0.756256	0.781788	0.781485
Other anxiety disorders (F41)	0.570433	0.523332	0.574358	0.588459	0.588467
Acute bronchitis (J20)	0.570126	0.631832	0.62428	0.729656	0.723892
Self reported physical health status OK (N0Y1)	0.566946	0.679992	0.678453	0.694017	0.687485
Female genital prolapse (N81)	0.561297	0.869093	0.845049	0.870958	0.847288
Asthma (J45)	0.552627	0.609323	0.581505	0.679095	0.657204
Chronic diseases of tonsils and adenoids (J35)	0.546241	0.695258	0.689789	0.714271	0.709809
Self reported mental health status OK (N0Y1)	0.544187	0.547899	0.553742	0.553693	0.55304
Gastro-esophageal reflux disease (K21)	0.543539	0.629655	0.635772	0.666834	0.663879
Irritable bowel syndrome (K58)	0.541751	0.550092	0.561942	0.619928	0.602346
Gastritis and duodenitis (K29)	0.539708	0.656102	0.655785	0.705132	0.69906
Major depressive disorder, single episode (F32)	0.539196	0.574549	0.535486	0.608854	0.598033
Major depressive disorder, recurrent (F33)	0.529546	0.563181	0.530598	0.587029	0.54723
Vasomotor and allergic rhinitis (J30)	0.527727	0.583528	0.548695	0.637129	0.621101
Iron deficiency anemia (D50)	0.523368	0.696072	0.69096	0.694715	0.69096
Calculus of kidney and ureter (N20)	0.481958	0.680292	0.544905	0.699822	0.552059
Acute tubulo-interstitial nephritis (N10)	0.466098	0.580012	0.49606	0.758197	0.685758
