# Supplementary material for: Gut metagenome associations with extensive digital health data in a volunteer-based Estonian microbiome cohort
Source: Research Square preprint supplement (doi:10.21203/rs.3.rs-929392/v1), 2021-10-04
Supplement: Supplementary file 10 [file bc25f27e21d3c526801ca28d.xlsx]

## Sheet: MWAS_species
factor_group	factor_name	feature	Estimate	p.value	FDR	adjusted
Diseases	Acute appendicitis (K35)	k__Bacteria;p__Firmicutes;c__Unclassified;o__Unclassified;f__Unclassified;g__Unclassified;s__Firmicutes bacterium CAG:110_56_8	-1.3063	8.05949e-07	0.000992123	BMI, Age, gender, usual stool type
Diseases	Acute appendicitis (K35)	k__Bacteria;p__Firmicutes;c__Unclassified;o__Unclassified;f__Unclassified;g__Unclassified;s__Firmicutes bacterium CAG:110_56_8	-1.316	5.9665e-07	0.000734476	BMI, Age, gender, usual stool type, history of antibiotic usage
Diseases	Acute bronchitis (J20)	k__Bacteria;p__Proteobacteria;c__Betaproteobacteria;o__Burkholderiales;f__Sutterellaceae;g__Sutterella;s__Sutterella sp. CAG:397	-0.668632	1.4779e-06	0.0018193	BMI, Age, gender, usual stool type
Diseases	Acute bronchitis (J20)	k__Bacteria;p__Firmicutes;c__Clostridia;o__Clostridiales;f__Oscillospiraceae;g__Oscillibacter;s__Oscillibacter sp. KLE 1728	0.309795	3.74664e-06	0.00460786	BMI, Age, gender, usual stool type
Diseases	Acute bronchitis (J20)	k__Bacteria;p__Proteobacteria;c__Betaproteobacteria;o__Burkholderiales;f__Sutterellaceae;g__Duodenibacillus;s__Duodenibacillus massiliensis	-0.867338	5.35475e-06	0.00658145	BMI, Age, gender, usual stool type
Diseases	Acute bronchitis (J20)	k__Bacteria;p__Bacteroidetes;c__Bacteroidia;o__Bacteroidales;f__Tannerellaceae;g__Parabacteroides;s__Parabacteroides sp. 20_3	0.38432	1.42285e-05	0.0174644	BMI, Age, gender, usual stool type
Diseases	Acute bronchitis (J20)	k__Bacteria;p__Bacteroidetes;c__Bacteroidia;o__Bacteroidales;f__Bacteroidaceae;g__Bacteroides;s__Bacteroides ndongoniae	0.448034	1.4273e-05	0.0175201	BMI, Age, gender, usual stool type
Diseases	Cholelithiasis (K80)	k__Bacteria;p__Firmicutes;c__Clostridia;o__Clostridiales;f__Clostridiaceae;g__Clostridium;s__Clostridium phoceensis	0.449819	3.70339e-05	0.0455671	BMI, Age, gender, usual stool type
Diseases	Cholelithiasis (K80)	k__Bacteria;p__Firmicutes;c__Clostridia;o__Clostridiales;f__Clostridiaceae;g__Clostridium;s__Clostridium phoceensis	0.445623	3.61839e-05	0.0445248	BMI, Age, gender, usual stool type, history of antibiotic usage
Diseases	Chronic kidney disease (CKD) (N18)	k__Bacteria;p__Firmicutes;c__Clostridia;o__Clostridiales;f__Lachnospiraceae;g__Blautia;s__[Ruminococcus] gnavus	1.32923	5.39092e-07	0.000663615	BMI, Age, gender, usual stool type
Diseases	Chronic kidney disease (CKD) (N18)	k__Bacteria;p__Firmicutes;c__Clostridia;o__Clostridiales;f__Lachnospiraceae;g__Blautia;s__[Ruminococcus] gnavus	1.21551	4.82654e-06	0.00594141	BMI, Age, gender, usual stool type, history of antibiotic usage
Diseases	Chronic viral hepatitis (B18)	k__Bacteria;p__Firmicutes;c__Clostridia;o__Clostridiales;f__Ruminococcaceae;g__Agathobaculum;s__Agathobaculum butyriciproducens	-0.817686	2.71494e-05	0.033406	BMI, Age, gender, usual stool type
Diseases	Chronic viral hepatitis (B18)	k__Bacteria;p__Firmicutes;c__Clostridia;o__Clostridiales;f__Ruminococcaceae;g__Agathobaculum;s__Agathobaculum butyriciproducens	-0.82833	2.14447e-05	0.0263882	BMI, Age, gender, usual stool type, history of antibiotic usage
Diseases	Crohn's disease [regional enteritis] (K50)	k__Bacteria;p__Proteobacteria;c__Gammaproteobacteria;o__Enterobacterales;f__Enterobacteriaceae;g__Cronobacter;s__Cronobacter sakazakii	1.50032	4.04095e-09	4.97377e-06	BMI, Age, gender, usual stool type
Diseases	Crohn's disease [regional enteritis] (K50)	k__Bacteria;p__Proteobacteria;c__Gammaproteobacteria;o__Enterobacterales;f__Enterobacteriaceae;g__Salmonella;s__Salmonella enterica	1.74667	7.75196e-09	9.5329e-06	BMI, Age, gender, usual stool type
Diseases	Crohn's disease [regional enteritis] (K50)	k__Bacteria;p__Proteobacteria;c__Gammaproteobacteria;o__Enterobacterales;f__Enterobacteriaceae;g__Cronobacter;s__Cronobacter malonaticus	1.28665	2.59121e-08	3.18306e-05	BMI, Age, gender, usual stool type
Diseases	Crohn's disease [regional enteritis] (K50)	k__Bacteria;p__Proteobacteria;c__Gammaproteobacteria;o__Enterobacterales;f__Enterobacteriaceae;g__Enterobacter;s__Enterobacter cloacae	1.33122	5.3639e-08	6.58528e-05	BMI, Age, gender, usual stool type
Diseases	Crohn's disease [regional enteritis] (K50)	k__Bacteria;p__Proteobacteria;c__Gammaproteobacteria;o__Enterobacterales;f__Enterobacteriaceae;g__Klebsiella;s__Klebsiella oxytoca	1.24965	1.10263e-07	0.000135236	BMI, Age, gender, usual stool type
Diseases	Crohn's disease [regional enteritis] (K50)	k__Bacteria;p__Actinobacteria;c__Actinobacteria;o__Corynebacteriales;f__Mycobacteriaceae;g__Mycobacterium;s__Mycobacterium tuberculosis	1.01541	2.65722e-07	0.000325437	BMI, Age, gender, usual stool type
Diseases	Crohn's disease [regional enteritis] (K50)	k__Bacteria;p__Firmicutes;c__Unclassified;o__Unclassified;f__Unclassified;g__Unclassified;s__Firmicutes bacterium CAG:466	1.39028	3.09966e-07	0.000379333	BMI, Age, gender, usual stool type
Diseases	Crohn's disease [regional enteritis] (K50)	k__Bacteria;p__Proteobacteria;c__Gammaproteobacteria;o__Vibrionales;f__Vibrionaceae;g__Vibrio;s__Vibrio cholerae	1.45327	4.67361e-07	0.000571256	BMI, Age, gender, usual stool type
Diseases	Crohn's disease [regional enteritis] (K50)	k__Bacteria;p__Proteobacteria;c__Gammaproteobacteria;o__Enterobacterales;f__Enterobacteriaceae;g__Klebsiella;s__Klebsiella variicola	1.73475	5.7391e-07	0.000700575	BMI, Age, gender, usual stool type
Diseases	Crohn's disease [regional enteritis] (K50)	k__Bacteria;p__Firmicutes;c__Unclassified;o__Unclassified;f__Unclassified;g__Unclassified;s__Firmicutes bacterium CAG:94	0.888964	6.23378e-07	0.000760632	BMI, Age, gender, usual stool type
Diseases	Crohn's disease [regional enteritis] (K50)	k__Bacteria;p__Proteobacteria;c__Gammaproteobacteria;o__Enterobacterales;f__Enterobacteriaceae;g__Citrobacter;s__Citrobacter koseri	1.88972	6.59955e-07	0.000805054	BMI, Age, gender, usual stool type
Diseases	Crohn's disease [regional enteritis] (K50)	k__Bacteria;p__Proteobacteria;c__Gammaproteobacteria;o__Enterobacterales;f__Enterobacteriaceae;g__Shigella;s__Shigella sonnei	1.95291	7.60839e-07	0.000927516	BMI, Age, gender, usual stool type
Diseases	Crohn's disease [regional enteritis] (K50)	k__Bacteria;p__Bacteroidetes;c__Bacteroidia;o__Bacteroidales;f__Tannerellaceae;g__Parabacteroides;s__Parabacteroides sp. AM17-47	1.95111	8.70628e-07	0.00106054	BMI, Age, gender, usual stool type
Diseases	Crohn's disease [regional enteritis] (K50)	k__Bacteria;p__Proteobacteria;c__Gammaproteobacteria;o__Pseudomonadales;f__Pseudomonadaceae;g__Pseudomonas;s__Pseudomonas putida	1.24223	9.48969e-07	0.00115571	BMI, Age, gender, usual stool type
Diseases	Crohn's disease [regional enteritis] (K50)	k__Bacteria;p__Bacteroidetes;c__Bacteroidia;o__Bacteroidales;f__Bacteroidaceae;g__Bacteroides;s__Bacteroides sp. 3_1_23	2.22456	1.45625e-06	0.00177078	BMI, Age, gender, usual stool type
Diseases	Crohn's disease [regional enteritis] (K50)	k__Bacteria;p__Bacteroidetes;c__Bacteroidia;o__Bacteroidales;f__Bacteroidaceae;g__Bacteroides;s__Bacteroides xylanisolvens	1.779	2.38638e-06	0.00289786	BMI, Age, gender, usual stool type
Diseases	Crohn's disease [regional enteritis] (K50)	k__Bacteria;p__Actinobacteria;c__Coriobacteriia;o__Eggerthellales;f__Eggerthellaceae;g__Eggerthella;s__Eggerthella sp. CAG:1427	1.00826	2.81619e-06	0.00341495	BMI, Age, gender, usual stool type
Diseases	Crohn's disease [regional enteritis] (K50)	k__Bacteria;p__Bacteroidetes;c__Bacteroidia;o__Bacteroidales;f__Bacteroidaceae;g__Bacteroides;s__Bacteroides fragilis CAG:558	1.95907	2.84782e-06	0.00345321	BMI, Age, gender, usual stool type
Diseases	Crohn's disease [regional enteritis] (K50)	k__Bacteria;p__Bacteroidetes;c__Bacteroidia;o__Bacteroidales;f__Bacteroidaceae;g__Bacteroides;s__Bacteroides reticulotermitis	2.1298	3.77026e-06	0.00456358	BMI, Age, gender, usual stool type
Diseases	Crohn's disease [regional enteritis] (K50)	k__Bacteria;p__Firmicutes;c__Clostridia;o__Clostridiales;f__Clostridiaceae;g__Butyricicoccus;s__uncultured Butyricicoccus sp.	0.7978	3.91743e-06	0.00473916	BMI, Age, gender, usual stool type
Diseases	Crohn's disease [regional enteritis] (K50)	k__Bacteria;p__Bacteroidetes;c__Bacteroidia;o__Bacteroidales;f__Bacteroidaceae;g__Bacteroides;s__Bacteroides ovatus	2.29045	5.28785e-06	0.00638556	BMI, Age, gender, usual stool type
Diseases	Crohn's disease [regional enteritis] (K50)	k__Bacteria;p__Firmicutes;c__Clostridia;o__Clostridiales;f__Ruminococcaceae;g__Flavonifractor;s__Flavonifractor plautii	0.892979	5.71252e-06	0.00689236	BMI, Age, gender, usual stool type
Diseases	Crohn's disease [regional enteritis] (K50)	k__Bacteria;p__Bacteroidetes;c__Bacteroidia;o__Bacteroidales;f__Bacteroidaceae;g__Bacteroides;s__Bacteroides sp. AM56-10ce	3.03763	6.05733e-06	0.00730119	BMI, Age, gender, usual stool type
Diseases	Crohn's disease [regional enteritis] (K50)	k__Eukaryota;p__Arthropoda;c__Arachnida;o__Araneae;f__Araneidae;g__Nephila;s__Nephila clavipes	1.00384	6.17877e-06	0.00744516	BMI, Age, gender, usual stool type
Diseases	Crohn's disease [regional enteritis] (K50)	k__Bacteria;p__Firmicutes;c__Clostridia;o__Clostridiales;f__Clostridiaceae;g__Clostridium;s__Clostridium sp. ATCC BAA-442	1.1752	6.25576e-06	0.00753876	BMI, Age, gender, usual stool type
Diseases	Crohn's disease [regional enteritis] (K50)	k__Bacteria;p__Proteobacteria;c__Gammaproteobacteria;o__Pseudomonadales;f__Moraxellaceae;g__Acinetobacter;s__Acinetobacter baumannii	1.18703	6.31461e-06	0.00761021	BMI, Age, gender, usual stool type
Diseases	Crohn's disease [regional enteritis] (K50)	k__Bacteria;p__Firmicutes;c__Clostridia;o__Clostridiales;f__Lachnospiraceae;g__Lachnoclostridium;s__[Clostridium] clostridioforme	1.25132	7.05604e-06	0.00849396	BMI, Age, gender, usual stool type
Diseases	Crohn's disease [regional enteritis] (K50)	k__Bacteria;p__Bacteroidetes;c__Bacteroidia;o__Bacteroidales;f__Bacteroidaceae;g__Bacteroides;s__Bacteroides sp. CAG:754	1.67972	9.27277e-06	0.0111372	BMI, Age, gender, usual stool type
Diseases	Crohn's disease [regional enteritis] (K50)	k__Bacteria;p__Bacteroidetes;c__Bacteroidia;o__Bacteroidales;f__Bacteroidaceae;g__Bacteroides;s__Bacteroides sp. 2_1_22	2.34007	1.07971e-05	0.0129428	BMI, Age, gender, usual stool type
Diseases	Crohn's disease [regional enteritis] (K50)	k__Bacteria;p__Bacteroidetes;c__Bacteroidia;o__Bacteroidales;f__Tannerellaceae;g__Parabacteroides;s__Parabacteroides johnsonii CAG:246	1.67227	1.1702e-05	0.0140226	BMI, Age, gender, usual stool type
Diseases	Crohn's disease [regional enteritis] (K50)	k__Bacteria;p__Firmicutes;c__Clostridia;o__Clostridiales;f__Clostridiaceae;g__Clostridium;s__Clostridium sp. KLE 1755	0.993211	1.2074e-05	0.0144266	BMI, Age, gender, usual stool type
Diseases	Crohn's disease [regional enteritis] (K50)	k__Bacteria;p__Proteobacteria;c__Gammaproteobacteria;o__Enterobacterales;f__Enterobacteriaceae;g__Shigella;s__Shigella flexneri	2.00811	1.25574e-05	0.0150279	BMI, Age, gender, usual stool type
Diseases	Crohn's disease [regional enteritis] (K50)	k__Bacteria;p__Bacteroidetes;c__Bacteroidia;o__Bacteroidales;f__Rikenellaceae;g__Alistipes;s__Alistipes sp. CAG:157	1.64341	1.32388e-05	0.0158341	BMI, Age, gender, usual stool type
Diseases	Crohn's disease [regional enteritis] (K50)	k__Bacteria;p__Bacteroidetes;c__Bacteroidia;o__Bacteroidales;f__Bacteroidaceae;g__Bacteroides;s__Bacteroides sp. 1_1_14	2.52555	1.38969e-05	0.016607	BMI, Age, gender, usual stool type
Diseases	Crohn's disease [regional enteritis] (K50)	k__Bacteria;p__Proteobacteria;c__Gammaproteobacteria;o__Oceanospirillales;f__Halomonadaceae;g__Zymobacter;s__Zymobacter palmae	1.2975	1.47883e-05	0.0176499	BMI, Age, gender, usual stool type
Diseases	Crohn's disease [regional enteritis] (K50)	k__Bacteria;p__Bacteroidetes;c__Bacteroidia;o__Bacteroidales;f__Bacteroidaceae;g__Bacteroides;s__Bacteroides fragilis	1.97205	1.53181e-05	0.0182777	BMI, Age, gender, usual stool type
Diseases	Crohn's disease [regional enteritis] (K50)	k__Bacteria;p__Bacteroidetes;c__Bacteroidia;o__Bacteroidales;f__Bacteroidaceae;g__Bacteroides;s__Bacteroides sp. CF01-10NS	2.96607	1.70459e-05	0.0202722	BMI, Age, gender, usual stool type
Diseases	Crohn's disease [regional enteritis] (K50)	k__Bacteria;p__Bacteroidetes;c__Bacteroidia;o__Bacteroidales;f__Bacteroidaceae;g__Bacteroides;s__Bacteroides thetaiotaomicron CAG:40	2.07607	1.70703e-05	0.0203304	BMI, Age, gender, usual stool type
Diseases	Crohn's disease [regional enteritis] (K50)	k__Bacteria;p__Bacteroidetes;c__Bacteroidia;o__Bacteroidales;f__Prevotellaceae;g__Prevotella;s__Prevotella saccharolytica	1.53406	1.87004e-05	0.0222163	BMI, Age, gender, usual stool type
Diseases	Crohn's disease [regional enteritis] (K50)	k__Bacteria;p__Proteobacteria;c__Gammaproteobacteria;o__Enterobacterales;f__Enterobacteriaceae;g__Cronobacter;s__Cronobacter dublinensis	1.38719	1.89846e-05	0.0225498	BMI, Age, gender, usual stool type
Diseases	Crohn's disease [regional enteritis] (K50)	k__Bacteria;p__Bacteroidetes;c__Bacteroidia;o__Bacteroidales;f__Prevotellaceae;g__Prevotella;s__Prevotella sp. tf2-5	-4.17953	1.9903e-05	0.0230911	BMI, Age, gender, usual stool type
Diseases	Crohn's disease [regional enteritis] (K50)	k__Bacteria;p__Bacteroidetes;c__Bacteroidia;o__Bacteroidales;f__Bacteroidaceae;g__Bacteroides;s__Bacteroides sp. 2_2_4	2.29282	1.97576e-05	0.0234525	BMI, Age, gender, usual stool type
Diseases	Crohn's disease [regional enteritis] (K50)	k__Bacteria;p__Bacteroidetes;c__Bacteroidia;o__Bacteroidales;f__Bacteroidaceae;g__Bacteroides;s__Bacteroides sp. 1_1_30	2.22216	2.00212e-05	0.023755	BMI, Age, gender, usual stool type
Diseases	Crohn's disease [regional enteritis] (K50)	k__Bacteria;p__Bacteroidetes;c__Bacteroidia;o__Bacteroidales;f__Bacteroidaceae;g__Bacteroides;s__Bacteroides sp. CAG:875	1.91031	2.01905e-05	0.0239557	BMI, Age, gender, usual stool type
Diseases	Crohn's disease [regional enteritis] (K50)	k__Bacteria;p__Bacteroidetes;c__Bacteroidia;o__Bacteroidales;f__Bacteroidaceae;g__Bacteroides;s__Bacteroides thetaiotaomicron	2.07502	2.06104e-05	0.0244399	BMI, Age, gender, usual stool type
Diseases	Crohn's disease [regional enteritis] (K50)	k__Bacteria;p__Bacteroidetes;c__Bacteroidia;o__Bacteroidales;f__Unclassified;g__Unclassified;s__Bacteroidales bacterium Barb7	1.55735	2.17324e-05	0.0257273	BMI, Age, gender, usual stool type
Diseases	Crohn's disease [regional enteritis] (K50)	k__Bacteria;p__Bacteroidetes;c__Bacteroidia;o__Bacteroidales;f__Tannerellaceae;g__Tannerella;s__Tannerella sp. CAG:118	1.80762	2.34604e-05	0.0277328	BMI, Age, gender, usual stool type
Diseases	Crohn's disease [regional enteritis] (K50)	k__Bacteria;p__Bacteroidetes;c__Bacteroidia;o__Bacteroidales;f__Bacteroidaceae;g__Bacteroides;s__Bacteroides clarus CAG:160	1.80035	2.3809e-05	0.028128	BMI, Age, gender, usual stool type
Diseases	Crohn's disease [regional enteritis] (K50)	k__Bacteria;p__Proteobacteria;c__Gammaproteobacteria;o__Pseudomonadales;f__Pseudomonadaceae;g__Pseudomonas;s__Pseudomonas syringae	0.87733	2.50914e-05	0.0296153	BMI, Age, gender, usual stool type
Diseases	Crohn's disease [regional enteritis] (K50)	k__Bacteria;p__Proteobacteria;c__Betaproteobacteria;o__Burkholderiales;f__Sutterellaceae;g__Sutterella;s__Sutterella sp. CAG:351	1.20595	2.89788e-05	0.0341156	BMI, Age, gender, usual stool type
Diseases	Crohn's disease [regional enteritis] (K50)	k__Bacteria;p__Bacteroidetes;c__Bacteroidia;o__Bacteroidales;f__Bacteroidaceae;g__Bacteroides;s__Bacteroides sp. CAG:1076	2.76909	2.95754e-05	0.0348198	BMI, Age, gender, usual stool type
Diseases	Crohn's disease [regional enteritis] (K50)	k__Bacteria;p__Unclassified;c__Unclassified;o__Unclassified;f__Unclassified;g__Unclassified;s__uncultured bacterium	1.25511	3.11033e-05	0.0365872	BMI, Age, gender, usual stool type
Diseases	Crohn's disease [regional enteritis] (K50)	k__Bacteria;p__Firmicutes;c__Clostridia;o__Clostridiales;f__Ruminococcaceae;g__Ruminococcus;s__Ruminococcus sp. CAG:60	1.06931	3.18243e-05	0.0373708	BMI, Age, gender, usual stool type
Diseases	Crohn's disease [regional enteritis] (K50)	k__Bacteria;p__Proteobacteria;c__Gammaproteobacteria;o__Enterobacterales;f__Enterobacteriaceae;g__Cronobacter;s__Cronobacter universalis	1.48184	3.28987e-05	0.038595	BMI, Age, gender, usual stool type
Diseases	Crohn's disease [regional enteritis] (K50)	k__Bacteria;p__Bacteroidetes;c__Bacteroidia;o__Bacteroidales;f__Bacteroidaceae;g__Bacteroides;s__Bacteroides sp. CAG:702	1.70365	3.53331e-05	0.0414181	BMI, Age, gender, usual stool type
Diseases	Crohn's disease [regional enteritis] (K50)	k__Bacteria;p__Bacteroidetes;c__Bacteroidia;o__Bacteroidales;f__Bacteroidaceae;g__Bacteroides;s__Bacteroides intestinalis CAG:564	1.83615	3.57509e-05	0.0418931	BMI, Age, gender, usual stool type
Diseases	Crohn's disease [regional enteritis] (K50)	k__Bacteria;p__Bacteroidetes;c__Bacteroidia;o__Bacteroidales;f__Bacteroidaceae;g__Bacteroides;s__Bacteroides faecis CAG:32	1.89683	3.57911e-05	0.0419425	BMI, Age, gender, usual stool type
Diseases	Crohn's disease [regional enteritis] (K50)	k__Bacteria;p__Proteobacteria;c__Gammaproteobacteria;o__Enterobacterales;f__Enterobacteriaceae;g__Klebsiella;s__Klebsiella pneumoniae	1.84561	3.60937e-05	0.0422864	BMI, Age, gender, usual stool type
Diseases	Crohn's disease [regional enteritis] (K50)	k__Bacteria;p__Proteobacteria;c__Gammaproteobacteria;o__Enterobacterales;f__Enterobacteriaceae;g__Escherichia;s__Escherichia coli	2.20487	3.68346e-05	0.0431185	BMI, Age, gender, usual stool type
Diseases	Crohn's disease [regional enteritis] (K50)	k__Bacteria;p__Bacteroidetes;c__Bacteroidia;o__Bacteroidales;f__Unclassified;g__Unclassified;s__Bacteroidales bacterium Barb6	1.57518	3.91669e-05	0.0457648	BMI, Age, gender, usual stool type
Diseases	Crohn's disease [regional enteritis] (K50)	k__Bacteria;p__Bacteroidetes;c__Bacteroidia;o__Bacteroidales;f__Prevotellaceae;g__Prevotella;s__Prevotella sp. F0091	1.52592	4.03149e-05	0.0470864	BMI, Age, gender, usual stool type
Diseases	Crohn's disease [regional enteritis] (K50)	k__Bacteria;p__Proteobacteria;c__Gammaproteobacteria;o__Enterobacterales;f__Enterobacteriaceae;g__Cronobacter;s__Cronobacter sakazakii	1.48101	4.47481e-09	5.50784e-06	BMI, Age, gender, usual stool type, history of antibiotic usage
Diseases	Crohn's disease [regional enteritis] (K50)	k__Bacteria;p__Proteobacteria;c__Gammaproteobacteria;o__Enterobacterales;f__Enterobacteriaceae;g__Salmonella;s__Salmonella enterica	1.72781	8.92819e-09	1.09793e-05	BMI, Age, gender, usual stool type, history of antibiotic usage
Diseases	Crohn's disease [regional enteritis] (K50)	k__Bacteria;p__Proteobacteria;c__Gammaproteobacteria;o__Enterobacterales;f__Enterobacteriaceae;g__Cronobacter;s__Cronobacter malonaticus	1.27269	3.00122e-08	3.6867e-05	BMI, Age, gender, usual stool type, history of antibiotic usage
Diseases	Crohn's disease [regional enteritis] (K50)	k__Bacteria;p__Proteobacteria;c__Gammaproteobacteria;o__Enterobacterales;f__Enterobacteriaceae;g__Enterobacter;s__Enterobacter cloacae	1.31887	6.24988e-08	7.67286e-05	BMI, Age, gender, usual stool type, history of antibiotic usage
Diseases	Crohn's disease [regional enteritis] (K50)	k__Bacteria;p__Proteobacteria;c__Gammaproteobacteria;o__Enterobacterales;f__Enterobacteriaceae;g__Klebsiella;s__Klebsiella oxytoca	1.23897	1.28108e-07	0.000157121	BMI, Age, gender, usual stool type, history of antibiotic usage
Diseases	Crohn's disease [regional enteritis] (K50)	k__Bacteria;p__Actinobacteria;c__Actinobacteria;o__Corynebacteriales;f__Mycobacteriaceae;g__Mycobacterium;s__Mycobacterium tuberculosis	1.00337	3.08833e-07	0.000378229	BMI, Age, gender, usual stool type, history of antibiotic usage
Diseases	Crohn's disease [regional enteritis] (K50)	k__Bacteria;p__Firmicutes;c__Unclassified;o__Unclassified;f__Unclassified;g__Unclassified;s__Firmicutes bacterium CAG:466	1.37429	3.6073e-07	0.000441441	BMI, Age, gender, usual stool type, history of antibiotic usage
Diseases	Crohn's disease [regional enteritis] (K50)	k__Bacteria;p__Proteobacteria;c__Gammaproteobacteria;o__Vibrionales;f__Vibrionaceae;g__Vibrio;s__Vibrio cholerae	1.43331	5.3951e-07	0.000659427	BMI, Age, gender, usual stool type, history of antibiotic usage
Diseases	Crohn's disease [regional enteritis] (K50)	k__Bacteria;p__Proteobacteria;c__Gammaproteobacteria;o__Enterobacterales;f__Enterobacteriaceae;g__Klebsiella;s__Klebsiella variicola	1.72504	6.44659e-07	0.000787085	BMI, Age, gender, usual stool type, history of antibiotic usage
Diseases	Crohn's disease [regional enteritis] (K50)	k__Bacteria;p__Firmicutes;c__Unclassified;o__Unclassified;f__Unclassified;g__Unclassified;s__Firmicutes bacterium CAG:94	0.882033	7.16188e-07	0.000873889	BMI, Age, gender, usual stool type, history of antibiotic usage
Diseases	Crohn's disease [regional enteritis] (K50)	k__Bacteria;p__Proteobacteria;c__Gammaproteobacteria;o__Enterobacterales;f__Enterobacteriaceae;g__Citrobacter;s__Citrobacter koseri	1.87017	7.67837e-07	0.000936574	BMI, Age, gender, usual stool type, history of antibiotic usage
Diseases	Crohn's disease [regional enteritis] (K50)	k__Bacteria;p__Proteobacteria;c__Gammaproteobacteria;o__Enterobacterales;f__Enterobacteriaceae;g__Shigella;s__Shigella sonnei	1.92794	8.84365e-07	0.00107803	BMI, Age, gender, usual stool type, history of antibiotic usage
Diseases	Crohn's disease [regional enteritis] (K50)	k__Bacteria;p__Bacteroidetes;c__Bacteroidia;o__Bacteroidales;f__Tannerellaceae;g__Parabacteroides;s__Parabacteroides sp. AM17-47	1.92192	1.00111e-06	0.00121944	BMI, Age, gender, usual stool type, history of antibiotic usage
Diseases	Crohn's disease [regional enteritis] (K50)	k__Bacteria;p__Proteobacteria;c__Gammaproteobacteria;o__Pseudomonadales;f__Pseudomonadaceae;g__Pseudomonas;s__Pseudomonas putida	1.2321	1.09084e-06	0.00132848	BMI, Age, gender, usual stool type, history of antibiotic usage
Diseases	Crohn's disease [regional enteritis] (K50)	k__Bacteria;p__Bacteroidetes;c__Bacteroidia;o__Bacteroidales;f__Bacteroidaceae;g__Bacteroides;s__Bacteroides sp. 3_1_23	2.1838	1.62915e-06	0.00198105	BMI, Age, gender, usual stool type, history of antibiotic usage
Diseases	Crohn's disease [regional enteritis] (K50)	k__Bacteria;p__Bacteroidetes;c__Bacteroidia;o__Bacteroidales;f__Bacteroidaceae;g__Bacteroides;s__Bacteroides xylanisolvens	1.74947	2.73736e-06	0.0033238	BMI, Age, gender, usual stool type, history of antibiotic usage
Diseases	Crohn's disease [regional enteritis] (K50)	k__Bacteria;p__Bacteroidetes;c__Bacteroidia;o__Bacteroidales;f__Bacteroidaceae;g__Bacteroides;s__Bacteroides fragilis CAG:558	1.92205	3.20451e-06	0.00388586	BMI, Age, gender, usual stool type, history of antibiotic usage
Diseases	Crohn's disease [regional enteritis] (K50)	k__Bacteria;p__Actinobacteria;c__Coriobacteriia;o__Eggerthellales;f__Eggerthellaceae;g__Eggerthella;s__Eggerthella sp. CAG:1427	0.99106	3.22472e-06	0.00391036	BMI, Age, gender, usual stool type, history of antibiotic usage
Diseases	Crohn's disease [regional enteritis] (K50)	k__Bacteria;p__Bacteroidetes;c__Bacteroidia;o__Bacteroidales;f__Bacteroidaceae;g__Bacteroides;s__Bacteroides reticulotermitis	2.10827	4.35777e-06	0.00527473	BMI, Age, gender, usual stool type, history of antibiotic usage
Diseases	Crohn's disease [regional enteritis] (K50)	k__Bacteria;p__Firmicutes;c__Clostridia;o__Clostridiales;f__Clostridiaceae;g__Butyricicoccus;s__uncultured Butyricicoccus sp.	0.786723	4.56002e-06	0.00551601	BMI, Age, gender, usual stool type, history of antibiotic usage
Diseases	Crohn's disease [regional enteritis] (K50)	k__Bacteria;p__Bacteroidetes;c__Bacteroidia;o__Bacteroidales;f__Bacteroidaceae;g__Bacteroides;s__Bacteroides ovatus	2.24984	6.06925e-06	0.0073299	BMI, Age, gender, usual stool type, history of antibiotic usage
Diseases	Crohn's disease [regional enteritis] (K50)	k__Bacteria;p__Firmicutes;c__Clostridia;o__Clostridiales;f__Ruminococcaceae;g__Flavonifractor;s__Flavonifractor plautii	0.881873	6.64607e-06	0.00801807	BMI, Age, gender, usual stool type, history of antibiotic usage
Diseases	Crohn's disease [regional enteritis] (K50)	k__Bacteria;p__Bacteroidetes;c__Bacteroidia;o__Bacteroidales;f__Bacteroidaceae;g__Bacteroides;s__Bacteroides sp. AM56-10ce	2.99895	7.04934e-06	0.00849605	BMI, Age, gender, usual stool type, history of antibiotic usage
Diseases	Crohn's disease [regional enteritis] (K50)	k__Eukaryota;p__Arthropoda;c__Arachnida;o__Araneae;f__Araneidae;g__Nephila;s__Nephila clavipes	0.991735	7.1807e-06	0.00865154	BMI, Age, gender, usual stool type, history of antibiotic usage
Diseases	Crohn's disease [regional enteritis] (K50)	k__Bacteria;p__Firmicutes;c__Clostridia;o__Clostridiales;f__Clostridiaceae;g__Clostridium;s__Clostridium sp. ATCC BAA-442	1.15815	7.28219e-06	0.00877483	BMI, Age, gender, usual stool type, history of antibiotic usage
Diseases	Crohn's disease [regional enteritis] (K50)	k__Bacteria;p__Proteobacteria;c__Gammaproteobacteria;o__Pseudomonadales;f__Moraxellaceae;g__Acinetobacter;s__Acinetobacter baumannii	1.16683	7.29208e-06	0.00878856	BMI, Age, gender, usual stool type, history of antibiotic usage
Diseases	Crohn's disease [regional enteritis] (K50)	k__Bacteria;p__Firmicutes;c__Clostridia;o__Clostridiales;f__Lachnospiraceae;g__Lachnoclostridium;s__[Clostridium] clostridioforme	1.23009	8.15747e-06	0.00981963	BMI, Age, gender, usual stool type, history of antibiotic usage
Diseases	Crohn's disease [regional enteritis] (K50)	k__Bacteria;p__Bacteroidetes;c__Bacteroidia;o__Bacteroidales;f__Bacteroidaceae;g__Bacteroides;s__Bacteroides sp. CAG:754	1.65402	1.07914e-05	0.0129593	BMI, Age, gender, usual stool type, history of antibiotic usage
Diseases	Crohn's disease [regional enteritis] (K50)	k__Bacteria;p__Bacteroidetes;c__Bacteroidia;o__Bacteroidales;f__Bacteroidaceae;g__Bacteroides;s__Bacteroides sp. 2_1_22	2.29148	1.22223e-05	0.014654	BMI, Age, gender, usual stool type, history of antibiotic usage
Diseases	Crohn's disease [regional enteritis] (K50)	k__Bacteria;p__Bacteroidetes;c__Bacteroidia;o__Bacteroidales;f__Tannerellaceae;g__Parabacteroides;s__Parabacteroides johnsonii CAG:246	1.64212	1.35159e-05	0.0161953	BMI, Age, gender, usual stool type, history of antibiotic usage
Diseases	Crohn's disease [regional enteritis] (K50)	k__Bacteria;p__Firmicutes;c__Clostridia;o__Clostridiales;f__Clostridiaceae;g__Clostridium;s__Clostridium sp. KLE 1755	0.977608	1.40506e-05	0.016784	BMI, Age, gender, usual stool type, history of antibiotic usage
Diseases	Crohn's disease [regional enteritis] (K50)	k__Bacteria;p__Proteobacteria;c__Gammaproteobacteria;o__Enterobacterales;f__Enterobacteriaceae;g__Shigella;s__Shigella flexneri	1.97884	1.46261e-05	0.0174992	BMI, Age, gender, usual stool type, history of antibiotic usage
Diseases	Crohn's disease [regional enteritis] (K50)	k__Bacteria;p__Bacteroidetes;c__Bacteroidia;o__Bacteroidales;f__Rikenellaceae;g__Alistipes;s__Alistipes sp. CAG:157	1.61581	1.53763e-05	0.0183872	BMI, Age, gender, usual stool type, history of antibiotic usage
Diseases	Crohn's disease [regional enteritis] (K50)	k__Bacteria;p__Bacteroidetes;c__Bacteroidia;o__Bacteroidales;f__Bacteroidaceae;g__Bacteroides;s__Bacteroides sp. 1_1_14	2.47658	1.59587e-05	0.0190692	BMI, Age, gender, usual stool type, history of antibiotic usage
Diseases	Crohn's disease [regional enteritis] (K50)	k__Bacteria;p__Bacteroidetes;c__Bacteroidia;o__Bacteroidales;f__Bacteroidaceae;g__Bacteroides;s__Bacteroides fragilis	1.92407	1.68136e-05	0.0200731	BMI, Age, gender, usual stool type, history of antibiotic usage
Diseases	Crohn's disease [regional enteritis] (K50)	k__Bacteria;p__Proteobacteria;c__Gammaproteobacteria;o__Oceanospirillales;f__Halomonadaceae;g__Zymobacter;s__Zymobacter palmae	1.2764	1.72046e-05	0.0205267	BMI, Age, gender, usual stool type, history of antibiotic usage
Diseases	Crohn's disease [regional enteritis] (K50)	k__Bacteria;p__Bacteroidetes;c__Bacteroidia;o__Bacteroidales;f__Bacteroidaceae;g__Bacteroides;s__Bacteroides thetaiotaomicron CAG:40	2.03563	1.96406e-05	0.0233875	BMI, Age, gender, usual stool type, history of antibiotic usage
Diseases	Crohn's disease [regional enteritis] (K50)	k__Bacteria;p__Bacteroidetes;c__Bacteroidia;o__Bacteroidales;f__Bacteroidaceae;g__Bacteroides;s__Bacteroides sp. CF01-10NS	2.92884	1.97656e-05	0.0235009	BMI, Age, gender, usual stool type, history of antibiotic usage
Diseases	Crohn's disease [regional enteritis] (K50)	k__Bacteria;p__Bacteroidetes;c__Bacteroidia;o__Bacteroidales;f__Prevotellaceae;g__Prevotella;s__Prevotella saccharolytica	1.50535	2.1619e-05	0.0256791	BMI, Age, gender, usual stool type, history of antibiotic usage
Diseases	Crohn's disease [regional enteritis] (K50)	k__Bacteria;p__Proteobacteria;c__Gammaproteobacteria;o__Enterobacterales;f__Enterobacteriaceae;g__Cronobacter;s__Cronobacter dublinensis	1.35859	2.17181e-05	0.0257961	BMI, Age, gender, usual stool type, history of antibiotic usage
Diseases	Crohn's disease [regional enteritis] (K50)	k__Bacteria;p__Bacteroidetes;c__Bacteroidia;o__Bacteroidales;f__Prevotellaceae;g__Prevotella;s__Prevotella sp. tf2-5	-4.14247	2.25946e-05	0.0262215	BMI, Age, gender, usual stool type, history of antibiotic usage
Diseases	Crohn's disease [regional enteritis] (K50)	k__Bacteria;p__Bacteroidetes;c__Bacteroidia;o__Bacteroidales;f__Bacteroidaceae;g__Bacteroides;s__Bacteroides sp. 2_2_4	2.24108	2.22649e-05	0.0264406	BMI, Age, gender, usual stool type, history of antibiotic usage
Diseases	Crohn's disease [regional enteritis] (K50)	k__Bacteria;p__Bacteroidetes;c__Bacteroidia;o__Bacteroidales;f__Bacteroidaceae;g__Bacteroides;s__Bacteroides sp. 1_1_30	2.17454	2.27879e-05	0.027041	BMI, Age, gender, usual stool type, history of antibiotic usage
Diseases	Crohn's disease [regional enteritis] (K50)	k__Bacteria;p__Bacteroidetes;c__Bacteroidia;o__Bacteroidales;f__Bacteroidaceae;g__Bacteroides;s__Bacteroides sp. CAG:875	1.88712	2.33627e-05	0.0277128	BMI, Age, gender, usual stool type, history of antibiotic usage
Diseases	Crohn's disease [regional enteritis] (K50)	k__Bacteria;p__Bacteroidetes;c__Bacteroidia;o__Bacteroidales;f__Bacteroidaceae;g__Bacteroides;s__Bacteroides thetaiotaomicron	2.03306	2.36652e-05	0.0280598	BMI, Age, gender, usual stool type, history of antibiotic usage
Diseases	Crohn's disease [regional enteritis] (K50)	k__Bacteria;p__Bacteroidetes;c__Bacteroidia;o__Bacteroidales;f__Unclassified;g__Unclassified;s__Bacteroidales bacterium Barb7	1.52715	2.50816e-05	0.0296907	BMI, Age, gender, usual stool type, history of antibiotic usage
Diseases	Crohn's disease [regional enteritis] (K50)	k__Bacteria;p__Bacteroidetes;c__Bacteroidia;o__Bacteroidales;f__Tannerellaceae;g__Tannerella;s__Tannerella sp. CAG:118	1.77522	2.72431e-05	0.032194	BMI, Age, gender, usual stool type, history of antibiotic usage
Diseases	Crohn's disease [regional enteritis] (K50)	k__Bacteria;p__Bacteroidetes;c__Bacteroidia;o__Bacteroidales;f__Bacteroidaceae;g__Bacteroides;s__Bacteroides clarus CAG:160	1.76431	2.74181e-05	0.0323891	BMI, Age, gender, usual stool type, history of antibiotic usage
Diseases	Crohn's disease [regional enteritis] (K50)	k__Bacteria;p__Proteobacteria;c__Gammaproteobacteria;o__Pseudomonadales;f__Pseudomonadaceae;g__Pseudomonas;s__Pseudomonas syringae	0.866535	2.90203e-05	0.0342464	BMI, Age, gender, usual stool type, history of antibiotic usage
Diseases	Crohn's disease [regional enteritis] (K50)	k__Bacteria;p__Bacteroidetes;c__Bacteroidia;o__Bacteroidales;f__Bacteroidaceae;g__Bacteroides;s__Bacteroides sp. CAG:1076	2.75219	3.25618e-05	0.0383573	BMI, Age, gender, usual stool type, history of antibiotic usage
Diseases	Crohn's disease [regional enteritis] (K50)	k__Bacteria;p__Proteobacteria;c__Betaproteobacteria;o__Burkholderiales;f__Sutterellaceae;g__Sutterella;s__Sutterella sp. CAG:351	1.19425	3.29932e-05	0.038848	BMI, Age, gender, usual stool type, history of antibiotic usage
Diseases	Crohn's disease [regional enteritis] (K50)	k__Bacteria;p__Unclassified;c__Unclassified;o__Unclassified;f__Unclassified;g__Unclassified;s__uncultured bacterium	1.22984	3.59029e-05	0.0422266	BMI, Age, gender, usual stool type, history of antibiotic usage
Diseases	Crohn's disease [regional enteritis] (K50)	k__Bacteria;p__Firmicutes;c__Clostridia;o__Clostridiales;f__Ruminococcaceae;g__Ruminococcus;s__Ruminococcus sp. CAG:60	1.05301	3.70551e-05	0.0434987	BMI, Age, gender, usual stool type, history of antibiotic usage
Diseases	Crohn's disease [regional enteritis] (K50)	k__Bacteria;p__Proteobacteria;c__Gammaproteobacteria;o__Enterobacterales;f__Enterobacteriaceae;g__Cronobacter;s__Cronobacter universalis	1.45351	3.81456e-05	0.0447446	BMI, Age, gender, usual stool type, history of antibiotic usage
Diseases	Crohn's disease [regional enteritis] (K50)	k__Bacteria;p__Bacteroidetes;c__Bacteroidia;o__Bacteroidales;f__Bacteroidaceae;g__Bacteroides;s__Bacteroides sp. CAG:702	1.67793	4.11265e-05	0.0481911	BMI, Age, gender, usual stool type, history of antibiotic usage
Diseases	Crohn's disease [regional enteritis] (K50)	k__Bacteria;p__Bacteroidetes;c__Bacteroidia;o__Bacteroidales;f__Bacteroidaceae;g__Bacteroides;s__Bacteroides faecis CAG:32	1.85713	4.12191e-05	0.0483048	BMI, Age, gender, usual stool type, history of antibiotic usage
Diseases	Crohn's disease [regional enteritis] (K50)	k__Bacteria;p__Bacteroidetes;c__Bacteroidia;o__Bacteroidales;f__Bacteroidaceae;g__Bacteroides;s__Bacteroides intestinalis CAG:564	1.79906	4.1313e-05	0.0484047	BMI, Age, gender, usual stool type, history of antibiotic usage
Diseases	Crohn's disease [regional enteritis] (K50)	k__Bacteria;p__Proteobacteria;c__Gammaproteobacteria;o__Enterobacterales;f__Enterobacteriaceae;g__Klebsiella;s__Klebsiella pneumoniae	1.82244	4.17073e-05	0.0488596	BMI, Age, gender, usual stool type, history of antibiotic usage
Diseases	Crohn's disease [regional enteritis] (K50)	k__Bacteria;p__Proteobacteria;c__Gammaproteobacteria;o__Enterobacterales;f__Enterobacteriaceae;g__Escherichia;s__Escherichia coli	2.18053	4.22326e-05	0.0494443	BMI, Age, gender, usual stool type, history of antibiotic usage
Diseases	Disorders of lipoprotein metabolism and other lipidemias (E78)	k__Bacteria;p__Firmicutes;c__Clostridia;o__Clostridiales;f__Clostridiaceae;g__Butyricicoccus;s__Butyricicoccus porcorum	-0.273281	2.04155e-06	0.00251306	BMI, Age, gender, usual stool type
Diseases	Disorders of lipoprotein metabolism and other lipidemias (E78)	k__Bacteria;p__Bacteroidetes;c__Bacteroidia;o__Bacteroidales;f__Porphyromonadaceae;g__Porphyromonas;s__Porphyromonas gingivalis	0.298973	1.19108e-05	0.014649	BMI, Age, gender, usual stool type
Diseases	Disorders of lipoprotein metabolism and other lipidemias (E78)	k__Bacteria;p__Bacteroidetes;c__Flavobacteriia;o__Flavobacteriales;f__Flavobacteriaceae;g__Ornithobacterium;s__Ornithobacterium rhinotracheale	0.344977	1.68344e-05	0.0206908	BMI, Age, gender, usual stool type
Diseases	Disorders of lipoprotein metabolism and other lipidemias (E78)	k__Bacteria;p__Firmicutes;c__Clostridia;o__Clostridiales;f__Clostridiaceae;g__Butyricicoccus;s__Butyricicoccus porcorum	-0.272922	2.12004e-06	0.00260977	BMI, Age, gender, usual stool type, history of antibiotic usage
Diseases	Disorders of lipoprotein metabolism and other lipidemias (E78)	k__Bacteria;p__Bacteroidetes;c__Bacteroidia;o__Bacteroidales;f__Porphyromonadaceae;g__Porphyromonas;s__Porphyromonas gingivalis	0.294312	1.48184e-05	0.0182253	BMI, Age, gender, usual stool type, history of antibiotic usage
Diseases	Disorders of lipoprotein metabolism and other lipidemias (E78)	k__Bacteria;p__Bacteroidetes;c__Flavobacteriia;o__Flavobacteriales;f__Flavobacteriaceae;g__Ornithobacterium;s__Ornithobacterium rhinotracheale	0.335736	2.15758e-05	0.026518	BMI, Age, gender, usual stool type, history of antibiotic usage
Diseases	Essential (primary) hypertension (I10)	k__Bacteria;p__Bacteroidetes;c__Bacteroidia;o__Bacteroidales;f__Tannerellaceae;g__Parabacteroides;s__Parabacteroides distasonis	0.476373	5.65018e-09	6.95537e-06	BMI, Age, gender, usual stool type
Diseases	Essential (primary) hypertension (I10)	k__Bacteria;p__Bacteroidetes;c__Bacteroidia;o__Bacteroidales;f__Tannerellaceae;g__Parabacteroides;s__Parabacteroides sp. D13	0.499904	1.23404e-08	1.51717e-05	BMI, Age, gender, usual stool type
Diseases	Essential (primary) hypertension (I10)	k__Bacteria;p__Bacteroidetes;c__Bacteroidia;o__Bacteroidales;f__Bacteroidaceae;g__Bacteroides;s__Bacteroides faecis CAG:32	0.499823	1.33237e-08	1.63745e-05	BMI, Age, gender, usual stool type
Diseases	Essential (primary) hypertension (I10)	k__Bacteria;p__Bacteroidetes;c__Bacteroidia;o__Bacteroidales;f__Porphyromonadaceae;g__Porphyromonas;s__Porphyromonas sp. 31_2	0.578741	1.67983e-08	2.06303e-05	BMI, Age, gender, usual stool type
Diseases	Essential (primary) hypertension (I10)	k__Bacteria;p__Firmicutes;c__Unclassified;o__Unclassified;f__Unclassified;g__Unclassified;s__Firmicutes bacterium CAG:95	-0.800037	2.68201e-08	3.28973e-05	BMI, Age, gender, usual stool type
Diseases	Essential (primary) hypertension (I10)	k__Bacteria;p__Proteobacteria;c__Gammaproteobacteria;o__Pseudomonadales;f__Pseudomonadaceae;g__Pseudomonas;s__Pseudomonas chlororaphis	0.576806	3.88305e-08	4.75797e-05	BMI, Age, gender, usual stool type
Diseases	Essential (primary) hypertension (I10)	k__Bacteria;p__Bacteroidetes;c__Bacteroidia;o__Bacteroidales;f__Bacteroidaceae;g__Bacteroides;s__Bacteroides sp. 3_1_40A	0.579255	4.26142e-08	5.22109e-05	BMI, Age, gender, usual stool type
Diseases	Essential (primary) hypertension (I10)	k__Bacteria;p__Bacteroidetes;c__Bacteroidia;o__Bacteroidales;f__Tannerellaceae;g__Parabacteroides;s__Parabacteroides sp. 20_3	0.505959	7.10088e-08	8.68885e-05	BMI, Age, gender, usual stool type
Diseases	Essential (primary) hypertension (I10)	k__Bacteria;p__Firmicutes;c__Unclassified;o__Unclassified;f__Unclassified;g__Unclassified;s__Firmicutes bacterium CAG:345	-1.15114	1.56181e-07	0.000190185	BMI, Age, gender, usual stool type
Diseases	Essential (primary) hypertension (I10)	k__Bacteria;p__Bacteroidetes;c__Bacteroidia;o__Bacteroidales;f__Bacteroidaceae;g__Bacteroides;s__Bacteroides fragilis CAG:47	0.443026	1.95007e-07	0.00023816	BMI, Age, gender, usual stool type
Diseases	Essential (primary) hypertension (I10)	k__Bacteria;p__Bacteroidetes;c__Bacteroidia;o__Bacteroidales;f__Tannerellaceae;g__Parabacteroides;s__Parabacteroides merdae CAG:48	0.376887	2.72436e-07	0.000332179	BMI, Age, gender, usual stool type
Diseases	Essential (primary) hypertension (I10)	k__Bacteria;p__Bacteroidetes;c__Bacteroidia;o__Bacteroidales;f__Bacteroidaceae;g__Bacteroides;s__Bacteroides thetaiotaomicron CAG:40	0.473612	3.16729e-07	0.000385543	BMI, Age, gender, usual stool type
Diseases	Essential (primary) hypertension (I10)	k__Bacteria;p__Bacteroidetes;c__Bacteroidia;o__Bacteroidales;f__Bacteroidaceae;g__Bacteroides;s__Bacteroides dorei	0.52168	3.31943e-07	0.000403846	BMI, Age, gender, usual stool type
Diseases	Essential (primary) hypertension (I10)	k__Bacteria;p__Unclassified;c__Unclassified;o__Unclassified;f__Unclassified;g__Unclassified;s__uncultured bacterium MedeBAC46A06	0.533578	3.67787e-07	0.000446285	BMI, Age, gender, usual stool type
Diseases	Essential (primary) hypertension (I10)	k__Bacteria;p__Bacteroidetes;c__Bacteroidia;o__Bacteroidales;f__Bacteroidaceae;g__Bacteroides;s__Bacteroides sp. 4_3_47FAA	0.561447	3.69733e-07	0.000449183	BMI, Age, gender, usual stool type
Diseases	Essential (primary) hypertension (I10)	k__Bacteria;p__Bacteroidetes;c__Bacteroidia;o__Bacteroidales;f__Bacteroidaceae;g__Bacteroides;s__Bacteroides coprophilus CAG:333	0.515286	3.98197e-07	0.000483357	BMI, Age, gender, usual stool type
Diseases	Essential (primary) hypertension (I10)	k__Bacteria;p__Firmicutes;c__Clostridia;o__Clostridiales;f__Lachnospiraceae;g__Lachnoclostridium;s__[Clostridium] bolteae	0.241307	4.40736e-07	0.000533841	BMI, Age, gender, usual stool type
Diseases	Essential (primary) hypertension (I10)	k__Bacteria;p__Bacteroidetes;c__Bacteroidia;o__Bacteroidales;f__Unclassified;g__Unclassified;s__Bacteroidales bacterium Barb7	0.355184	4.45134e-07	0.000539586	BMI, Age, gender, usual stool type
Diseases	Essential (primary) hypertension (I10)	k__Bacteria;p__Bacteroidetes;c__Bacteroidia;o__Bacteroidales;f__Bacteroidaceae;g__Bacteroides;s__Bacteroides sp. 2_1_22	0.519826	4.50825e-07	0.000540251	BMI, Age, gender, usual stool type
Diseases	Essential (primary) hypertension (I10)	k__Bacteria;p__Bacteroidetes;c__Bacteroidia;o__Bacteroidales;f__Bacteroidaceae;g__Bacteroides;s__Bacteroides clarus CAG:160	0.411084	4.91135e-07	0.000594555	BMI, Age, gender, usual stool type
Diseases	Essential (primary) hypertension (I10)	k__Bacteria;p__Firmicutes;c__Erysipelotrichia;o__Erysipelotrichales;f__Erysipelotrichaceae;g__Coprobacillus;s__Coprobacillus sp. CAG:826	-1.07086	5.04774e-07	0.000602932	BMI, Age, gender, usual stool type
Diseases	Essential (primary) hypertension (I10)	k__Bacteria;p__Bacteroidetes;c__Bacteroidia;o__Bacteroidales;f__Tannerellaceae;g__Parabacteroides;s__Parabacteroides sp. D25	0.5758	5.09772e-07	0.000612813	BMI, Age, gender, usual stool type
Diseases	Essential (primary) hypertension (I10)	k__Bacteria;p__Bacteroidetes;c__Bacteroidia;o__Bacteroidales;f__Bacteroidaceae;g__Bacteroides;s__Bacteroides sp. 2_1_33B	0.490327	5.28565e-07	0.000638789	BMI, Age, gender, usual stool type
Diseases	Essential (primary) hypertension (I10)	k__Bacteria;p__Bacteroidetes;c__Bacteroidia;o__Bacteroidales;f__Bacteroidaceae;g__Bacteroides;s__Bacteroides sp. AR29	0.65018	5.71908e-07	0.000690241	BMI, Age, gender, usual stool type
Diseases	Essential (primary) hypertension (I10)	k__Bacteria;p__Bacteroidetes;c__Bacteroidia;o__Bacteroidales;f__Bacteroidaceae;g__Bacteroides;s__Bacteroides uniformis	0.496166	5.89763e-07	0.000712128	BMI, Age, gender, usual stool type
Diseases	Essential (primary) hypertension (I10)	k__Bacteria;p__Firmicutes;c__Clostridia;o__Clostridiales;f__Oscillospiraceae;g__Oscillibacter;s__Oscillibacter sp. KLE 1728	0.354017	6.44271e-07	0.000775977	BMI, Age, gender, usual stool type
Diseases	Essential (primary) hypertension (I10)	k__Bacteria;p__Proteobacteria;c__Gammaproteobacteria;o__Pseudomonadales;f__Pseudomonadaceae;g__Pseudomonas;s__Pseudomonas aeruginosa	0.192829	6.59918e-07	0.000794936	BMI, Age, gender, usual stool type
Diseases	Essential (primary) hypertension (I10)	k__Bacteria;p__Bacteroidetes;c__Bacteroidia;o__Bacteroidales;f__Bacteroidaceae;g__Bacteroides;s__Bacteroides stercoris	0.649978	6.76754e-07	0.000815044	BMI, Age, gender, usual stool type
Diseases	Essential (primary) hypertension (I10)	k__Bacteria;p__Bacteroidetes;c__Bacteroidia;o__Bacteroidales;f__Bacteroidaceae;g__Bacteroides;s__Bacteroides sartorii	0.489142	6.81589e-07	0.000820685	BMI, Age, gender, usual stool type
Diseases	Essential (primary) hypertension (I10)	k__Bacteria;p__Bacteroidetes;c__Bacteroidia;o__Bacteroidales;f__Tannerellaceae;g__Parabacteroides;s__Parabacteroides johnsonii CAG:246	0.362225	7.51726e-07	0.000903348	BMI, Age, gender, usual stool type
Diseases	Essential (primary) hypertension (I10)	k__Bacteria;p__Bacteroidetes;c__Bacteroidia;o__Bacteroidales;f__Bacteroidaceae;g__Bacteroides;s__Bacteroides vulgatus	0.499071	7.93712e-07	0.000952669	BMI, Age, gender, usual stool type
Diseases	Essential (primary) hypertension (I10)	k__Bacteria;p__Proteobacteria;c__Gammaproteobacteria;o__Pseudomonadales;f__Pseudomonadaceae;g__Pseudomonas;s__Pseudomonas syringae group genomosp. 3	0.258153	8.20017e-07	0.000983488	BMI, Age, gender, usual stool type
Diseases	Essential (primary) hypertension (I10)	k__Bacteria;p__Bacteroidetes;c__Bacteroidia;o__Bacteroidales;f__Bacteroidaceae;g__Bacteroides;s__Bacteroides uniformis CAG:3	0.455744	8.25956e-07	0.000990557	BMI, Age, gender, usual stool type
Diseases	Essential (primary) hypertension (I10)	k__Bacteria;p__Bacteroidetes;c__Bacteroidia;o__Bacteroidales;f__Unclassified;g__Unclassified;s__Bacteroidales bacterium Barb6XT	0.372477	8.44944e-07	0.00101324	BMI, Age, gender, usual stool type
Diseases	Essential (primary) hypertension (I10)	k__Bacteria;p__Bacteroidetes;c__Bacteroidia;o__Bacteroidales;f__Bacteroidaceae;g__Bacteroides;s__Bacteroides stercoris CAG:120	0.410227	9.9129e-07	0.00118554	BMI, Age, gender, usual stool type
Diseases	Essential (primary) hypertension (I10)	k__Bacteria;p__Firmicutes;c__Clostridia;o__Clostridiales;f__Clostridiaceae;g__Clostridium;s__Clostridium sp. CAG:288	-0.856869	1.09903e-06	0.00131201	BMI, Age, gender, usual stool type
Diseases	Essential (primary) hypertension (I10)	k__Bacteria;p__Proteobacteria;c__Acidithiobacillia;o__Acidithiobacillales;f__Acidithiobacillaceae;g__Acidithiobacillus;s__Acidithiobacillus ferrivorans	0.268335	1.1075e-06	0.00132028	BMI, Age, gender, usual stool type
Diseases	Essential (primary) hypertension (I10)	k__Bacteria;p__Bacteroidetes;c__Bacteroidia;o__Bacteroidales;f__Bacteroidaceae;g__Bacteroides;s__Bacteroides sp. 1_1_30	0.484978	1.27566e-06	0.00151826	BMI, Age, gender, usual stool type
Diseases	Essential (primary) hypertension (I10)	k__Bacteria;p__Firmicutes;c__Clostridia;o__Clostridiales;f__Clostridiaceae;g__Clostridium;s__Clostridium sp. CAG:58	0.358075	1.34549e-06	0.00160147	BMI, Age, gender, usual stool type
Diseases	Essential (primary) hypertension (I10)	k__Bacteria;p__Bacteroidetes;c__Flavobacteriia;o__Flavobacteriales;f__Flavobacteriaceae;g__Ornithobacterium;s__Ornithobacterium rhinotracheale	0.376043	1.43996e-06	0.00171194	BMI, Age, gender, usual stool type
Diseases	Essential (primary) hypertension (I10)	k__Bacteria;p__Bacteroidetes;c__Bacteroidia;o__Bacteroidales;f__Tannerellaceae;g__Parabacteroides;s__Parabacteroides sp. CAG:2	0.427429	1.45062e-06	0.00172432	BMI, Age, gender, usual stool type
Diseases	Essential (primary) hypertension (I10)	k__Bacteria;p__Bacteroidetes;c__Bacteroidia;o__Bacteroidales;f__Bacteroidaceae;g__Bacteroides;s__Bacteroides fluxus	0.396321	1.73076e-06	0.00205108	BMI, Age, gender, usual stool type
Diseases	Essential (primary) hypertension (I10)	k__Bacteria;p__Firmicutes;c__Clostridia;o__Clostridiales;f__Oscillospiraceae;g__Oscillibacter;s__Oscillibacter sp. PEA192	0.321284	1.74064e-06	0.00206167	BMI, Age, gender, usual stool type
Diseases	Essential (primary) hypertension (I10)	k__Bacteria;p__Proteobacteria;c__Alphaproteobacteria;o__Rhodospirillales;f__Rhodospirillaceae;g__Nitrospirillum;s__Nitrospirillum amazonense	0.225183	1.77045e-06	0.00209604	BMI, Age, gender, usual stool type
Diseases	Essential (primary) hypertension (I10)	k__Bacteria;p__Bacteroidetes;c__Bacteroidia;o__Bacteroidales;f__Bacteroidaceae;g__Bacteroides;s__Bacteroides fragilis	0.417333	1.86e-06	0.00220089	BMI, Age, gender, usual stool type
Diseases	Essential (primary) hypertension (I10)	k__Eukaryota;p__Streptophyta;c__Liliopsida;o__Poales;f__Poaceae;g__Zea;s__Zea mays	0.242419	1.87782e-06	0.00221786	BMI, Age, gender, usual stool type
Diseases	Essential (primary) hypertension (I10)	k__Bacteria;p__Proteobacteria;c__Betaproteobacteria;o__Burkholderiales;f__Sutterellaceae;g__Parasutterella;s__Parasutterella excrementihominis CAG:233	0.563707	1.90916e-06	0.00225245	BMI, Age, gender, usual stool type
Diseases	Essential (primary) hypertension (I10)	k__Bacteria;p__Proteobacteria;c__Gammaproteobacteria;o__Enterobacterales;f__Enterobacteriaceae;g__Cronobacter;s__Cronobacter dublinensis	0.29626	1.95136e-06	0.00230549	BMI, Age, gender, usual stool type
Diseases	Essential (primary) hypertension (I10)	k__Bacteria;p__Bacteroidetes;c__Bacteroidia;o__Bacteroidales;f__Bacteroidaceae;g__Bacteroides;s__Bacteroides sp. 3_1_19	0.520085	1.97212e-06	0.00232948	BMI, Age, gender, usual stool type
Diseases	Essential (primary) hypertension (I10)	k__Bacteria;p__Bacteroidetes;c__Bacteroidia;o__Bacteroidales;f__Bacteroidaceae;g__Bacteroides;s__Bacteroides fragilis CAG:558	0.379736	2.30235e-06	0.00271069	BMI, Age, gender, usual stool type
Diseases	Essential (primary) hypertension (I10)	k__Bacteria;p__Proteobacteria;c__Gammaproteobacteria;o__Enterobacterales;f__Enterobacteriaceae;g__Cronobacter;s__Cronobacter universalis	0.323121	2.35856e-06	0.00277384	BMI, Age, gender, usual stool type
Diseases	Essential (primary) hypertension (I10)	k__Bacteria;p__Bacteroidetes;c__Bacteroidia;o__Bacteroidales;f__Unclassified;g__Unclassified;s__Bacteroidales bacterium Barb6	0.346643	2.40208e-06	0.00282574	BMI, Age, gender, usual stool type
Diseases	Essential (primary) hypertension (I10)	k__Bacteria;p__Bacteroidetes;c__Bacteroidia;o__Bacteroidales;f__Bacteroidaceae;g__Bacteroides;s__Bacteroides sp. AM56-10ce	0.610416	2.45701e-06	0.00287328	BMI, Age, gender, usual stool type
Diseases	Essential (primary) hypertension (I10)	k__Bacteria;p__Firmicutes;c__Clostridia;o__Thermoanaerobacterales;f__Thermoanaerobacteraceae;g__Moorella;s__Moorella thermoacetica	0.188564	2.53111e-06	0.00297151	BMI, Age, gender, usual stool type
Diseases	Essential (primary) hypertension (I10)	k__Bacteria;p__Proteobacteria;c__Betaproteobacteria;o__Burkholderiales;f__Unclassified;g__Unclassified;s__Burkholderiales bacterium	0.719438	2.68873e-06	0.0031483	BMI, Age, gender, usual stool type
Diseases	Essential (primary) hypertension (I10)	k__Bacteria;p__Bacteroidetes;c__Bacteroidia;o__Bacteroidales;f__Bacteroidaceae;g__Bacteroides;s__Bacteroides sp. 2_2_4	0.483588	2.80247e-06	0.00328435	BMI, Age, gender, usual stool type
Diseases	Essential (primary) hypertension (I10)	k__Bacteria;p__Proteobacteria;c__Unclassified;o__Unclassified;f__Unclassified;g__Unclassified;s__Proteobacteria bacterium CAG:139	0.684749	2.82358e-06	0.00330979	BMI, Age, gender, usual stool type
Diseases	Essential (primary) hypertension (I10)	k__Bacteria;p__Bacteroidetes;c__Bacteroidia;o__Bacteroidales;f__Bacteroidaceae;g__Bacteroides;s__Bacteroides sp. AF37-16AC	0.651754	2.85715e-06	0.0033307	BMI, Age, gender, usual stool type
Diseases	Essential (primary) hypertension (I10)	k__Bacteria;p__Firmicutes;c__Clostridia;o__Clostridiales;f__Clostridiaceae;g__Clostridium;s__Clostridium sp. CAG:524	-1.02355	3.08056e-06	0.00357651	BMI, Age, gender, usual stool type
Diseases	Essential (primary) hypertension (I10)	k__Bacteria;p__Proteobacteria;c__Alphaproteobacteria;o__Rhizobiales;f__Rhizobiaceae;g__Agrobacterium;s__Agrobacterium tumefaciens	0.273635	3.15651e-06	0.00367037	BMI, Age, gender, usual stool type
Diseases	Essential (primary) hypertension (I10)	k__Bacteria;p__Bacteroidetes;c__Bacteroidia;o__Bacteroidales;f__Bacteroidaceae;g__Bacteroides;s__Bacteroides sp. 4_1_36	0.531761	3.20845e-06	0.00375078	BMI, Age, gender, usual stool type
Diseases	Essential (primary) hypertension (I10)	k__Bacteria;p__Bacteroidetes;c__Bacteroidia;o__Bacteroidales;f__Bacteroidaceae;g__Bacteroides;s__Bacteroides clarus	0.504464	3.26942e-06	0.00382139	BMI, Age, gender, usual stool type
Diseases	Essential (primary) hypertension (I10)	k__Bacteria;p__Proteobacteria;c__Gammaproteobacteria;o__Pseudomonadales;f__Pseudomonadaceae;g__Pseudomonas;s__Pseudomonas fluorescens	0.191417	3.5822e-06	0.00417047	BMI, Age, gender, usual stool type
Diseases	Essential (primary) hypertension (I10)	k__Bacteria;p__Bacteroidetes;c__Bacteroidia;o__Bacteroidales;f__Bacteroidaceae;g__Bacteroides;s__Bacteroides intestinalis CAG:315	0.41777	3.69881e-06	0.00431143	BMI, Age, gender, usual stool type
Diseases	Essential (primary) hypertension (I10)	k__Bacteria;p__Bacteroidetes;c__Bacteroidia;o__Bacteroidales;f__Bacteroidaceae;g__Bacteroides;s__Bacteroides sp. AF29-11	0.606884	3.86219e-06	0.00447218	BMI, Age, gender, usual stool type
Diseases	Essential (primary) hypertension (I10)	k__Bacteria;p__Bacteroidetes;c__Bacteroidia;o__Bacteroidales;f__Tannerellaceae;g__Parabacteroides;s__Parabacteroides johnsonii	0.462858	3.97973e-06	0.00463129	BMI, Age, gender, usual stool type
Diseases	Essential (primary) hypertension (I10)	k__Bacteria;p__Firmicutes;c__Negativicutes;o__Acidaminococcales;f__Acidaminococcaceae;g__Acidaminococcus;s__Acidaminococcus sp. CAG:917	-0.680116	4.01307e-06	0.00464294	BMI, Age, gender, usual stool type
Diseases	Essential (primary) hypertension (I10)	k__Bacteria;p__Bacteroidetes;c__Bacteroidia;o__Bacteroidales;f__Bacteroidaceae;g__Bacteroides;s__Bacteroides oleiciplenus	0.455913	4.31129e-06	0.00500757	BMI, Age, gender, usual stool type
Diseases	Essential (primary) hypertension (I10)	k__Bacteria;p__Proteobacteria;c__Betaproteobacteria;o__Burkholderiales;f__Burkholderiaceae;g__Cupriavidus;s__Cupriavidus oxalaticus	0.242677	5.0988e-06	0.00589176	BMI, Age, gender, usual stool type
Diseases	Essential (primary) hypertension (I10)	k__Bacteria;p__Bacteroidetes;c__Bacteroidia;o__Bacteroidales;f__Bacteroidaceae;g__Bacteroides;s__Bacteroides sp. AF25-5LB	0.633344	5.19252e-06	0.00596917	BMI, Age, gender, usual stool type
Diseases	Essential (primary) hypertension (I10)	k__Bacteria;p__Proteobacteria;c__Gammaproteobacteria;o__Pseudomonadales;f__Pseudomonadaceae;g__Pseudomonas;s__Pseudomonas syringae	0.181787	5.36816e-06	0.00619354	BMI, Age, gender, usual stool type
Diseases	Essential (primary) hypertension (I10)	k__Bacteria;p__Proteobacteria;c__Gammaproteobacteria;o__Xanthomonadales;f__Xanthomonadaceae;g__Stenotrophomonas;s__Stenotrophomonas maltophilia	0.256834	5.64229e-06	0.00648379	BMI, Age, gender, usual stool type
Diseases	Essential (primary) hypertension (I10)	k__Bacteria;p__Proteobacteria;c__Betaproteobacteria;o__Burkholderiales;f__Sutterellaceae;g__Parasutterella;s__Parasutterella excrementihominis	0.577895	5.76844e-06	0.00664893	BMI, Age, gender, usual stool type
Diseases	Essential (primary) hypertension (I10)	k__Bacteria;p__Cyanobacteria;c__Unclassified;o__Nostocales;f__Hapalosiphonaceae;g__Fischerella;s__Fischerella thermalis	0.596979	6.01379e-06	0.00683557	BMI, Age, gender, usual stool type
Diseases	Essential (primary) hypertension (I10)	k__Bacteria;p__Bacteroidetes;c__Bacteroidia;o__Bacteroidales;f__Bacteroidaceae;g__Bacteroides;s__Bacteroides thetaiotaomicron	0.423065	6.10735e-06	0.00703304	BMI, Age, gender, usual stool type
Diseases	Essential (primary) hypertension (I10)	k__Bacteria;p__Bacteroidetes;c__Bacteroidia;o__Bacteroidales;f__Bacteroidaceae;g__Bacteroides;s__Bacteroides ovatus	0.436215	6.31628e-06	0.00726159	BMI, Age, gender, usual stool type
Diseases	Essential (primary) hypertension (I10)	k__Bacteria;p__Bacteroidetes;c__Bacteroidia;o__Bacteroidales;f__Bacteroidaceae;g__Bacteroides;s__Bacteroides sp. D22	0.497757	6.38987e-06	0.00729342	BMI, Age, gender, usual stool type
Diseases	Essential (primary) hypertension (I10)	k__Bacteria;p__Bacteroidetes;c__Bacteroidia;o__Bacteroidales;f__Bacteroidaceae;g__Bacteroides;s__Bacteroides eggerthii CAG:109	0.355413	6.35014e-06	0.00729717	BMI, Age, gender, usual stool type
Diseases	Essential (primary) hypertension (I10)	k__Bacteria;p__Bacteroidetes;c__Bacteroidia;o__Bacteroidales;f__Bacteroidaceae;g__Bacteroides;s__Bacteroides sp. CAG:598	0.367308	6.42676e-06	0.00738037	BMI, Age, gender, usual stool type
Diseases	Essential (primary) hypertension (I10)	k__Bacteria;p__Proteobacteria;c__Alphaproteobacteria;o__Rhodobacterales;f__Rhodobacteraceae;g__Salipiger;s__Salipiger bermudensis	0.212515	6.52708e-06	0.00746872	BMI, Age, gender, usual stool type
Diseases	Essential (primary) hypertension (I10)	k__Bacteria;p__Firmicutes;c__Unclassified;o__Unclassified;f__Unclassified;g__Unclassified;s__Firmicutes bacterium CAG:466	0.235432	6.56747e-06	0.00750434	BMI, Age, gender, usual stool type
Diseases	Essential (primary) hypertension (I10)	k__Bacteria;p__Proteobacteria;c__Alphaproteobacteria;o__Rhizobiales;f__Rhizobiaceae;g__Agrobacterium;s__Agrobacterium genomosp. 5	0.307222	6.65546e-06	0.00760752	BMI, Age, gender, usual stool type
Diseases	Essential (primary) hypertension (I10)	k__Bacteria;p__Firmicutes;c__Clostridia;o__Clostridiales;f__Ruminococcaceae;g__Faecalibacterium;s__Faecalibacterium sp. CAG:1138	-0.642588	6.68296e-06	0.00765111	BMI, Age, gender, usual stool type
Diseases	Essential (primary) hypertension (I10)	k__Bacteria;p__Bacteroidetes;c__Bacteroidia;o__Bacteroidales;f__Bacteroidaceae;g__Bacteroides;s__Bacteroides sp. CAG:661	0.300398	6.73384e-06	0.00771733	BMI, Age, gender, usual stool type
Diseases	Essential (primary) hypertension (I10)	k__Bacteria;p__Proteobacteria;c__Betaproteobacteria;o__Burkholderiales;f__Alcaligenaceae;g__Bordetella;s__Bordetella pertussis	0.212742	7.14065e-06	0.00816149	BMI, Age, gender, usual stool type
Diseases	Essential (primary) hypertension (I10)	k__Bacteria;p__Bacteroidetes;c__Bacteroidia;o__Bacteroidales;f__Bacteroidaceae;g__Bacteroides;s__Bacteroides sp. 9_1_42FAA	0.361903	7.28478e-06	0.00831752	BMI, Age, gender, usual stool type
Diseases	Essential (primary) hypertension (I10)	k__Bacteria;p__Bacteroidetes;c__Bacteroidia;o__Bacteroidales;f__Tannerellaceae;g__Parabacteroides;s__Parabacteroides merdae	0.513244	7.29069e-06	0.00832446	BMI, Age, gender, usual stool type
Diseases	Essential (primary) hypertension (I10)	k__Bacteria;p__Proteobacteria;c__Betaproteobacteria;o__Burkholderiales;f__Comamonadaceae;g__Hydrogenophaga;s__Hydrogenophaga sp. T4	0.22295	7.34553e-06	0.00837485	BMI, Age, gender, usual stool type
Diseases	Essential (primary) hypertension (I10)	k__Bacteria;p__Proteobacteria;c__Betaproteobacteria;o__Burkholderiales;f__Comamonadaceae;g__Variovorax;s__Variovorax sp. WDL1	0.313127	7.43257e-06	0.00845835	BMI, Age, gender, usual stool type
Diseases	Essential (primary) hypertension (I10)	k__Bacteria;p__Proteobacteria;c__Betaproteobacteria;o__Burkholderiales;f__Burkholderiaceae;g__Ralstonia;s__Ralstonia solanacearum	0.210199	7.68859e-06	0.00874757	BMI, Age, gender, usual stool type
Diseases	Essential (primary) hypertension (I10)	k__Bacteria;p__Proteobacteria;c__Gammaproteobacteria;o__Pseudomonadales;f__Moraxellaceae;g__Acinetobacter;s__Acinetobacter baumannii	0.225086	8.22498e-06	0.00934368	BMI, Age, gender, usual stool type
Diseases	Essential (primary) hypertension (I10)	k__Bacteria;p__Firmicutes;c__Clostridia;o__Clostridiales;f__Oscillospiraceae;g__Unclassified;s__Oscillospiraceae bacterium VE202-24	0.301638	8.31197e-06	0.00941639	BMI, Age, gender, usual stool type
Diseases	Essential (primary) hypertension (I10)	k__Bacteria;p__Bacteroidetes;c__Bacteroidia;o__Bacteroidales;f__Bacteroidaceae;g__Bacteroides;s__Bacteroides vulgatus CAG:6	0.449652	8.32908e-06	0.00945877	BMI, Age, gender, usual stool type
Diseases	Essential (primary) hypertension (I10)	k__Bacteria;p__Bacteroidetes;c__Bacteroidia;o__Bacteroidales;f__Porphyromonadaceae;g__Porphyromonas;s__Porphyromonas crevioricanis	0.381861	8.44844e-06	0.00958229	BMI, Age, gender, usual stool type
Diseases	Essential (primary) hypertension (I10)	k__Bacteria;p__Bacteroidetes;c__Bacteroidia;o__Bacteroidales;f__Dysgonamonadaceae;g__Dysgonomonas;s__uncultured Dysgonomonas sp.	0.379014	8.44845e-06	0.00958261	BMI, Age, gender, usual stool type
Diseases	Essential (primary) hypertension (I10)	k__Bacteria;p__Proteobacteria;c__Betaproteobacteria;o__Neisseriales;f__Neisseriaceae;g__Neisseria;s__Neisseria meningitidis	0.200421	8.67176e-06	0.00982919	BMI, Age, gender, usual stool type
Diseases	Essential (primary) hypertension (I10)	k__Bacteria;p__Proteobacteria;c__Gammaproteobacteria;o__Vibrionales;f__Vibrionaceae;g__Vibrio;s__Vibrio cholerae	0.246552	8.67534e-06	0.00983175	BMI, Age, gender, usual stool type
Diseases	Essential (primary) hypertension (I10)	k__Bacteria;p__Proteobacteria;c__Deltaproteobacteria;o__Myxococcales;f__Archangiaceae;g__Stigmatella;s__Stigmatella aurantiaca	0.176382	8.69996e-06	0.00985996	BMI, Age, gender, usual stool type
Diseases	Essential (primary) hypertension (I10)	k__Bacteria;p__Bacteroidetes;c__Bacteroidia;o__Bacteroidales;f__Tannerellaceae;g__Tannerella;s__Tannerella sp. CAG:51	0.396297	9.51899e-06	0.0107534	BMI, Age, gender, usual stool type
Diseases	Essential (primary) hypertension (I10)	k__Bacteria;p__Bacteroidetes;c__Bacteroidia;o__Bacteroidales;f__Bacteroidaceae;g__Bacteroides;s__Bacteroides intestinalis CAG:564	0.377627	9.52258e-06	0.0107563	BMI, Age, gender, usual stool type
Diseases	Essential (primary) hypertension (I10)	k__Bacteria;p__Bacteroidetes;c__Bacteroidia;o__Bacteroidales;f__Bacteroidaceae;g__Bacteroides;s__Bacteroides faecis	0.518342	9.67203e-06	0.0109197	BMI, Age, gender, usual stool type
Diseases	Essential (primary) hypertension (I10)	k__Bacteria;p__Firmicutes;c__Clostridia;o__Clostridiales;f__Clostridiaceae;g__Clostridium;s__Clostridium sp. CAG:1193	-1.03659	9.79825e-06	0.0109596	BMI, Age, gender, usual stool type
Diseases	Essential (primary) hypertension (I10)	k__Bacteria;p__Bacteroidetes;c__Bacteroidia;o__Bacteroidales;f__Bacteroidaceae;g__Bacteroides;s__Bacteroides eggerthii	0.539418	1.07876e-05	0.0121303	BMI, Age, gender, usual stool type
Diseases	Essential (primary) hypertension (I10)	k__Bacteria;p__Bacteroidetes;c__Bacteroidia;o__Bacteroidales;f__Bacteroidaceae;g__Bacteroides;s__Bacteroides sp. 1_1_14	0.491189	1.09072e-05	0.0122517	BMI, Age, gender, usual stool type
Diseases	Essential (primary) hypertension (I10)	k__Bacteria;p__Firmicutes;c__Unclassified;o__Unclassified;f__Unclassified;g__Unclassified;s__Firmicutes bacterium CAG:313	-1.10368	1.18407e-05	0.0132265	BMI, Age, gender, usual stool type
Diseases	Essential (primary) hypertension (I10)	k__Bacteria;p__Bacteroidetes;c__Bacteroidia;o__Bacteroidales;f__Porphyromonadaceae;g__Unclassified;s__Porphyromonadaceae bacterium KA00676	0.377323	1.20631e-05	0.0134886	BMI, Age, gender, usual stool type
Diseases	Essential (primary) hypertension (I10)	k__Bacteria;p__Bacteroidetes;c__Bacteroidia;o__Bacteroidales;f__Tannerellaceae;g__Tannerella;s__Tannerella sp. 6_1_58FAA_CT1	0.352224	1.22439e-05	0.013698	BMI, Age, gender, usual stool type
Diseases	Essential (primary) hypertension (I10)	k__Bacteria;p__Proteobacteria;c__Alphaproteobacteria;o__Rhodospirillales;f__Acetobacteraceae;g__Acidiphilium;s__Acidiphilium sp. CAG:727	-0.632581	1.22796e-05	0.0137198	BMI, Age, gender, usual stool type
Diseases	Essential (primary) hypertension (I10)	k__Bacteria;p__Actinobacteria;c__Coriobacteriia;o__Eggerthellales;f__Eggerthellaceae;g__Eggerthella;s__Eggerthella sp. CAG:1427	0.180534	1.25862e-05	0.0140668	BMI, Age, gender, usual stool type
Diseases	Essential (primary) hypertension (I10)	k__Bacteria;p__Bacteroidetes;c__Bacteroidia;o__Bacteroidales;f__Bacteroidaceae;g__Bacteroides;s__Bacteroides finegoldii	0.463678	1.25906e-05	0.0140707	BMI, Age, gender, usual stool type
Diseases	Essential (primary) hypertension (I10)	k__Bacteria;p__Bacteroidetes;c__Bacteroidia;o__Bacteroidales;f__Bacteroidaceae;g__Bacteroides;s__Bacteroides sp. AF20-13LB	0.47604	1.28216e-05	0.0143165	BMI, Age, gender, usual stool type
Diseases	Essential (primary) hypertension (I10)	k__Bacteria;p__Bacteroidetes;c__Cytophagia;o__Cytophagales;f__Flammeovirgaceae;g__Cesiribacter;s__Cesiribacter andamanensis	0.304081	1.31295e-05	0.0146401	BMI, Age, gender, usual stool type
Diseases	Essential (primary) hypertension (I10)	k__Bacteria;p__Bacteroidetes;c__Bacteroidia;o__Bacteroidales;f__Bacteroidaceae;g__Bacteroides;s__Bacteroides caecimuris	0.409619	1.34791e-05	0.0150232	BMI, Age, gender, usual stool type
Diseases	Essential (primary) hypertension (I10)	k__Bacteria;p__Bacteroidetes;c__Bacteroidia;o__Bacteroidales;f__Bacteroidaceae;g__Bacteroides;s__Bacteroides sp. HMSC067B03	0.538512	1.40173e-05	0.0155947	BMI, Age, gender, usual stool type
Diseases	Essential (primary) hypertension (I10)	k__Bacteria;p__Firmicutes;c__Bacilli;o__Lactobacillales;f__Streptococcaceae;g__Streptococcus;s__Streptococcus pneumoniae	0.161665	1.52931e-05	0.0169738	BMI, Age, gender, usual stool type
Diseases	Essential (primary) hypertension (I10)	k__Bacteria;p__Bacteroidetes;c__Bacteroidia;o__Bacteroidales;f__Tannerellaceae;g__Parabacteroides;s__Parabacteroides sp. AM17-47	0.329868	1.53384e-05	0.0170135	BMI, Age, gender, usual stool type
Diseases	Essential (primary) hypertension (I10)	k__Bacteria;p__Proteobacteria;c__Alphaproteobacteria;o__Rhodobacterales;f__Rhodobacteraceae;g__Pseudooceanicola;s__Pseudooceanicola batsensis	0.230919	1.54164e-05	0.0170835	BMI, Age, gender, usual stool type
Diseases	Essential (primary) hypertension (I10)	k__Bacteria;p__Bacteroidetes;c__Bacteroidia;o__Bacteroidales;f__Bacteroidaceae;g__Bacteroides;s__Bacteroides nordii	0.345086	1.55411e-05	0.0172453	BMI, Age, gender, usual stool type
Diseases	Essential (primary) hypertension (I10)	k__Bacteria;p__Firmicutes;c__Unclassified;o__Unclassified;f__Unclassified;g__Unclassified;s__Firmicutes bacterium CAG:460	-1.0611	1.6793e-05	0.0184963	BMI, Age, gender, usual stool type
Diseases	Essential (primary) hypertension (I10)	k__Bacteria;p__Firmicutes;c__Clostridia;o__Clostridiales;f__Clostridiaceae;g__Clostridium;s__Clostridium sp. CAG:505	0.176871	1.69054e-05	0.0186819	BMI, Age, gender, usual stool type
Diseases	Essential (primary) hypertension (I10)	k__Bacteria;p__Firmicutes;c__Clostridia;o__Clostridiales;f__Oscillospiraceae;g__Oscillibacter;s__Oscillibacter sp. KLE 1745	0.412647	1.76922e-05	0.0195126	BMI, Age, gender, usual stool type
Diseases	Essential (primary) hypertension (I10)	k__Bacteria;p__Bacteroidetes;c__Bacteroidia;o__Bacteroidales;f__Bacteroidaceae;g__Bacteroides;s__Bacteroides sp. OM08-17BH	0.472856	1.91208e-05	0.0210529	BMI, Age, gender, usual stool type
Diseases	Essential (primary) hypertension (I10)	k__Bacteria;p__Bacteroidetes;c__Bacteroidia;o__Bacteroidales;f__Bacteroidaceae;g__Bacteroides;s__Bacteroides sp. 3_1_33FAA	0.397087	1.92648e-05	0.021233	BMI, Age, gender, usual stool type
Diseases	Essential (primary) hypertension (I10)	k__Bacteria;p__Firmicutes;c__Clostridia;o__Clostridiales;f__Lachnospiraceae;g__Lachnoclostridium;s__[Clostridium] clostridioforme	0.228412	1.96155e-05	0.0216024	BMI, Age, gender, usual stool type
Diseases	Essential (primary) hypertension (I10)	k__Bacteria;p__Bacteroidetes;c__Bacteroidia;o__Bacteroidales;f__Bacteroidaceae;g__Bacteroides;s__Bacteroides sp. OF03-11BH	0.504284	1.96919e-05	0.0216237	BMI, Age, gender, usual stool type
Diseases	Essential (primary) hypertension (I10)	k__Bacteria;p__Bacteroidetes;c__Bacteroidia;o__Bacteroidales;f__Bacteroidaceae;g__Bacteroides;s__Bacteroides dorei CAG:222	0.385302	1.99548e-05	0.0219586	BMI, Age, gender, usual stool type
Diseases	Essential (primary) hypertension (I10)	k__Bacteria;p__Cyanobacteria;c__Unclassified;o__Oscillatoriales;f__Microcoleaceae;g__Trichodesmium;s__Trichodesmium erythraeum	0.306436	2.02456e-05	0.0222416	BMI, Age, gender, usual stool type
Diseases	Essential (primary) hypertension (I10)	k__Bacteria;p__Bacteroidetes;c__Bacteroidia;o__Bacteroidales;f__Tannerellaceae;g__Parabacteroides;s__Parabacteroides gordonii	0.392983	2.03965e-05	0.022397	BMI, Age, gender, usual stool type
Diseases	Essential (primary) hypertension (I10)	k__Bacteria;p__Bacteroidetes;c__Bacteroidia;o__Bacteroidales;f__Bacteroidaceae;g__Bacteroides;s__Bacteroides xylanisolvens	0.308141	2.10595e-05	0.0231469	BMI, Age, gender, usual stool type
Diseases	Essential (primary) hypertension (I10)	k__Bacteria;p__Tenericutes;c__Unclassified;o__Unclassified;f__Unclassified;g__Unclassified;s__Tenericutes bacterium HGW-Tenericutes-4	-0.876772	2.18292e-05	0.0234351	BMI, Age, gender, usual stool type
Diseases	Essential (primary) hypertension (I10)	k__Bacteria;p__Proteobacteria;c__Gammaproteobacteria;o__Xanthomonadales;f__Xanthomonadaceae;g__Xanthomonas;s__Xanthomonas phaseoli	0.22126	2.19952e-05	0.024103	BMI, Age, gender, usual stool type
Diseases	Essential (primary) hypertension (I10)	k__Bacteria;p__Tenericutes;c__Mollicutes;o__Anaeroplasmatales;f__Anaeroplasmataceae;g__Anaeroplasma;s__Anaeroplasma bactoclasticum	-0.745514	2.38561e-05	0.0256218	BMI, Age, gender, usual stool type
Diseases	Essential (primary) hypertension (I10)	k__Bacteria;p__Firmicutes;c__Clostridia;o__Clostridiales;f__Clostridiaceae;g__Clostridium;s__Clostridium sp. CAG:349	-0.879561	2.40663e-05	0.0263147	BMI, Age, gender, usual stool type
Diseases	Essential (primary) hypertension (I10)	k__Bacteria;p__Proteobacteria;c__Gammaproteobacteria;o__Enterobacterales;f__Yersiniaceae;g__Serratia;s__Serratia marcescens	0.186346	2.42545e-05	0.0265114	BMI, Age, gender, usual stool type
Diseases	Essential (primary) hypertension (I10)	k__Bacteria;p__Proteobacteria;c__Gammaproteobacteria;o__Chromatiales;f__Chromatiaceae;g__Thiocapsa;s__Thiocapsa sp. KS1	0.206373	2.46091e-05	0.0268928	BMI, Age, gender, usual stool type
Diseases	Essential (primary) hypertension (I10)	k__Bacteria;p__Unclassified;c__Unclassified;o__Unclassified;f__Unclassified;g__Unclassified;s__uncultured bacterium	0.24391	2.48686e-05	0.0271862	BMI, Age, gender, usual stool type
Diseases	Essential (primary) hypertension (I10)	k__Bacteria;p__Bacteroidetes;c__Bacteroidia;o__Bacteroidales;f__Bacteroidaceae;g__Bacteroides;s__Bacteroides ovatus CAG:22	0.360471	2.69157e-05	0.0293372	BMI, Age, gender, usual stool type
Diseases	Essential (primary) hypertension (I10)	k__Bacteria;p__Firmicutes;c__Clostridia;o__Clostridiales;f__Ruminococcaceae;g__Ruminococcus;s__Ruminococcus sp. HUN007	-0.430092	2.75878e-05	0.0297445	BMI, Age, gender, usual stool type
Diseases	Essential (primary) hypertension (I10)	k__Bacteria;p__Firmicutes;c__Erysipelotrichia;o__Erysipelotrichales;f__Erysipelotrichaceae;g__Coprobacillus;s__Coprobacillus sp. CAG:698	-0.88919	2.82454e-05	0.0299771	BMI, Age, gender, usual stool type
Diseases	Essential (primary) hypertension (I10)	k__Bacteria;p__Firmicutes;c__Unclassified;o__Unclassified;f__Unclassified;g__Unclassified;s__Firmicutes bacterium CAG:176_59_8	-0.5821	2.82129e-05	0.030541	BMI, Age, gender, usual stool type
Diseases	Essential (primary) hypertension (I10)	k__Bacteria;p__Bacteroidetes;c__Bacteroidia;o__Bacteroidales;f__Bacteroidaceae;g__Bacteroides;s__Bacteroides sp. D20	0.49457	2.85387e-05	0.0310408	BMI, Age, gender, usual stool type
Diseases	Essential (primary) hypertension (I10)	k__Bacteria;p__Bacteroidetes;c__Bacteroidia;o__Bacteroidales;f__Unclassified;g__Unclassified;s__Bacteroidales bacterium Barb4	0.29364	2.88527e-05	0.0313729	BMI, Age, gender, usual stool type
Diseases	Essential (primary) hypertension (I10)	k__Bacteria;p__Firmicutes;c__Unclassified;o__Unclassified;f__Unclassified;g__Unclassified;s__Firmicutes bacterium CAG:272_52_7	-0.636571	2.96617e-05	0.0314981	BMI, Age, gender, usual stool type
Diseases	Essential (primary) hypertension (I10)	k__Bacteria;p__Firmicutes;c__Clostridia;o__Clostridiales;f__Ruminococcaceae;g__Ruminococcus;s__Ruminococcus sp. CAG:379	0.171063	3.118e-05	0.0338125	BMI, Age, gender, usual stool type
Diseases	Essential (primary) hypertension (I10)	k__Bacteria;p__Firmicutes;c__Erysipelotrichia;o__Erysipelotrichales;f__Erysipelotrichaceae;g__Unclassified;s__Erysipelotrichaceae bacterium AF19-24AC	-0.358961	3.2435e-05	0.0349293	BMI, Age, gender, usual stool type
Diseases	Essential (primary) hypertension (I10)	k__Bacteria;p__Firmicutes;c__Clostridia;o__Clostridiales;f__Lachnospiraceae;g__Blautia;s__Blautia sp. CAG:237	0.289551	3.38044e-05	0.0365363	BMI, Age, gender, usual stool type
Diseases	Essential (primary) hypertension (I10)	k__Bacteria;p__Firmicutes;c__Clostridia;o__Clostridiales;f__Clostridiaceae;g__Clostridium;s__Clostridium sp. CAG:1000	-0.934594	3.51344e-05	0.0370285	BMI, Age, gender, usual stool type
Diseases	Essential (primary) hypertension (I10)	k__Bacteria;p__Proteobacteria;c__Deltaproteobacteria;o__Myxococcales;f__Myxococcaceae;g__Corallococcus;s__Corallococcus sp. CAG:1435	-0.526868	3.4832e-05	0.0376228	BMI, Age, gender, usual stool type
Diseases	Essential (primary) hypertension (I10)	k__Bacteria;p__Proteobacteria;c__Betaproteobacteria;o__Burkholderiales;f__Unclassified;g__Unclassified;s__Burkholderiales bacterium 1_1_47	0.661072	3.65309e-05	0.0391165	BMI, Age, gender, usual stool type
Diseases	Essential (primary) hypertension (I10)	k__Bacteria;p__Bacteroidetes;c__Bacteroidia;o__Bacteroidales;f__Bacteroidaceae;g__Bacteroides;s__Bacteroides finegoldii CAG:203	0.334985	3.77675e-05	0.040712	BMI, Age, gender, usual stool type
Diseases	Essential (primary) hypertension (I10)	k__Bacteria;p__Bacteroidetes;c__Bacteroidia;o__Bacteroidales;f__Bacteroidaceae;g__Bacteroides;s__Bacteroides sp. CAG:189	0.354152	3.84383e-05	0.0413829	BMI, Age, gender, usual stool type
Diseases	Essential (primary) hypertension (I10)	k__Eukaryota;p__Arthropoda;c__Arachnida;o__Araneae;f__Araneidae;g__Nephila;s__Nephila clavipes	0.174749	4.12549e-05	0.0442961	BMI, Age, gender, usual stool type
Diseases	Essential (primary) hypertension (I10)	k__Bacteria;p__Firmicutes;c__Clostridia;o__Clostridiales;f__Clostridiaceae;g__Clostridium;s__Clostridium sp. CAG:242	0.184405	4.24489e-05	0.0455339	BMI, Age, gender, usual stool type
Diseases	Essential (primary) hypertension (I10)	k__Bacteria;p__Bacteroidetes;c__Bacteroidia;o__Bacteroidales;f__Bacteroidaceae;g__Bacteroides;s__Bacteroides faecichinchillae	0.335014	4.24858e-05	0.0456027	BMI, Age, gender, usual stool type
Diseases	Essential (primary) hypertension (I10)	k__Bacteria;p__Firmicutes;c__Erysipelotrichia;o__Erysipelotrichales;f__Erysipelotrichaceae;g__Catenibacterium;s__Catenibacterium mitsuokai	0.355728	4.30451e-05	0.0461855	BMI, Age, gender, usual stool type
Diseases	Essential (primary) hypertension (I10)	k__Bacteria;p__Firmicutes;c__Clostridia;o__Clostridiales;f__Clostridiaceae;g__Clostridium;s__Clostridium sp. KLE 1755	0.178122	4.32423e-05	0.0462835	BMI, Age, gender, usual stool type
Diseases	Essential (primary) hypertension (I10)	k__Bacteria;p__Proteobacteria;c__Gammaproteobacteria;o__Oceanospirillales;f__Halomonadaceae;g__Zymobacter;s__Zymobacter palmae	0.234895	4.42281e-05	0.0474026	BMI, Age, gender, usual stool type
Diseases	Essential (primary) hypertension (I10)	k__Bacteria;p__Bacteroidetes;c__Bacteroidia;o__Bacteroidales;f__Tannerellaceae;g__Parabacteroides;s__Parabacteroides distasonis	0.418607	2.45989e-07	0.000302783	BMI, Age, gender, usual stool type, history of antibiotic usage
Diseases	Essential (primary) hypertension (I10)	k__Bacteria;p__Firmicutes;c__Unclassified;o__Unclassified;f__Unclassified;g__Unclassified;s__Firmicutes bacterium CAG:95	-0.730769	3.69921e-07	0.000454778	BMI, Age, gender, usual stool type, history of antibiotic usage
Diseases	Essential (primary) hypertension (I10)	k__Bacteria;p__Bacteroidetes;c__Bacteroidia;o__Bacteroidales;f__Tannerellaceae;g__Parabacteroides;s__Parabacteroides sp. D13	0.439804	4.51656e-07	0.00055498	BMI, Age, gender, usual stool type, history of antibiotic usage
Diseases	Essential (primary) hypertension (I10)	k__Bacteria;p__Bacteroidetes;c__Bacteroidia;o__Bacteroidales;f__Bacteroidaceae;g__Bacteroides;s__Bacteroides faecis CAG:32	0.439233	4.92504e-07	0.000604834	BMI, Age, gender, usual stool type, history of antibiotic usage
Diseases	Essential (primary) hypertension (I10)	k__Bacteria;p__Bacteroidetes;c__Bacteroidia;o__Bacteroidales;f__Porphyromonadaceae;g__Porphyromonas;s__Porphyromonas sp. 31_2	0.505146	6.85803e-07	0.00084134	BMI, Age, gender, usual stool type, history of antibiotic usage
Diseases	Essential (primary) hypertension (I10)	k__Bacteria;p__Proteobacteria;c__Gammaproteobacteria;o__Pseudomonadales;f__Pseudomonadaceae;g__Pseudomonas;s__Pseudomonas chlororaphis	0.509151	1.06716e-06	0.00130802	BMI, Age, gender, usual stool type, history of antibiotic usage
Diseases	Essential (primary) hypertension (I10)	k__Bacteria;p__Bacteroidetes;c__Bacteroidia;o__Bacteroidales;f__Bacteroidaceae;g__Bacteroides;s__Bacteroides sp. 3_1_40A	0.49872	1.88979e-06	0.00231379	BMI, Age, gender, usual stool type, history of antibiotic usage
Diseases	Essential (primary) hypertension (I10)	k__Bacteria;p__Firmicutes;c__Unclassified;o__Unclassified;f__Unclassified;g__Unclassified;s__Firmicutes bacterium CAG:345	-1.01227	3.56802e-06	0.00434641	BMI, Age, gender, usual stool type, history of antibiotic usage
Diseases	Essential (primary) hypertension (I10)	k__Bacteria;p__Firmicutes;c__Erysipelotrichia;o__Erysipelotrichales;f__Erysipelotrichaceae;g__Coprobacillus;s__Coprobacillus sp. CAG:826	-0.970446	5.30081e-06	0.0063845	BMI, Age, gender, usual stool type, history of antibiotic usage
Diseases	Essential (primary) hypertension (I10)	k__Bacteria;p__Bacteroidetes;c__Bacteroidia;o__Bacteroidales;f__Bacteroidaceae;g__Bacteroides;s__Bacteroides fragilis CAG:47	0.38437	5.43338e-06	0.00662786	BMI, Age, gender, usual stool type, history of antibiotic usage
Diseases	Essential (primary) hypertension (I10)	k__Bacteria;p__Bacteroidetes;c__Bacteroidia;o__Bacteroidales;f__Tannerellaceae;g__Parabacteroides;s__Parabacteroides sp. 20_3	0.418893	5.66033e-06	0.00690395	BMI, Age, gender, usual stool type, history of antibiotic usage
Diseases	Essential (primary) hypertension (I10)	k__Bacteria;p__Firmicutes;c__Clostridia;o__Clostridiales;f__Clostridiaceae;g__Clostridium;s__Clostridium sp. CAG:288	-0.800004	5.67452e-06	0.00691804	BMI, Age, gender, usual stool type, history of antibiotic usage
Diseases	Essential (primary) hypertension (I10)	k__Bacteria;p__Bacteroidetes;c__Bacteroidia;o__Bacteroidales;f__Bacteroidaceae;g__Bacteroides;s__Bacteroides coprophilus CAG:333	0.459779	5.75598e-06	0.00701892	BMI, Age, gender, usual stool type, history of antibiotic usage
Diseases	Essential (primary) hypertension (I10)	k__Bacteria;p__Firmicutes;c__Clostridia;o__Clostridiales;f__Lachnospiraceae;g__Lachnoclostridium;s__[Clostridium] bolteae	0.213755	7.15607e-06	0.00869735	BMI, Age, gender, usual stool type, history of antibiotic usage
Diseases	Essential (primary) hypertension (I10)	k__Bacteria;p__Bacteroidetes;c__Bacteroidia;o__Bacteroidales;f__Tannerellaceae;g__Parabacteroides;s__Parabacteroides merdae CAG:48	0.325811	7.54376e-06	0.00916894	BMI, Age, gender, usual stool type, history of antibiotic usage
Diseases	Essential (primary) hypertension (I10)	k__Bacteria;p__Bacteroidetes;c__Bacteroidia;o__Bacteroidales;f__Bacteroidaceae;g__Bacteroides;s__Bacteroides thetaiotaomicron CAG:40	0.411479	7.7772e-06	0.0094462	BMI, Age, gender, usual stool type, history of antibiotic usage
Diseases	Essential (primary) hypertension (I10)	k__Bacteria;p__Proteobacteria;c__Gammaproteobacteria;o__Pseudomonadales;f__Pseudomonadaceae;g__Pseudomonas;s__Pseudomonas aeruginosa	0.172192	8.58462e-06	0.0104108	BMI, Age, gender, usual stool type, history of antibiotic usage
Diseases	Essential (primary) hypertension (I10)	k__Bacteria;p__Firmicutes;c__Negativicutes;o__Acidaminococcales;f__Acidaminococcaceae;g__Acidaminococcus;s__Acidaminococcus sp. CAG:917	-0.654168	1.00811e-05	0.0121438	BMI, Age, gender, usual stool type, history of antibiotic usage
Diseases	Essential (primary) hypertension (I10)	k__Bacteria;p__Bacteroidetes;c__Bacteroidia;o__Bacteroidales;f__Unclassified;g__Unclassified;s__Bacteroidales bacterium Barb7	0.308799	1.00577e-05	0.0121639	BMI, Age, gender, usual stool type, history of antibiotic usage
Diseases	Essential (primary) hypertension (I10)	k__Bacteria;p__Bacteroidetes;c__Bacteroidia;o__Bacteroidales;f__Bacteroidaceae;g__Bacteroides;s__Bacteroides stercoris	0.575915	1.00782e-05	0.0121876	BMI, Age, gender, usual stool type, history of antibiotic usage
Diseases	Essential (primary) hypertension (I10)	k__Bacteria;p__Unclassified;c__Unclassified;o__Unclassified;f__Unclassified;g__Unclassified;s__uncultured bacterium MedeBAC46A06	0.456731	1.12933e-05	0.0136069	BMI, Age, gender, usual stool type, history of antibiotic usage
Diseases	Essential (primary) hypertension (I10)	k__Bacteria;p__Proteobacteria;c__Betaproteobacteria;o__Burkholderiales;f__Sutterellaceae;g__Parasutterella;s__Parasutterella excrementihominis CAG:233	0.520026	1.15152e-05	0.0138626	BMI, Age, gender, usual stool type, history of antibiotic usage
Diseases	Essential (primary) hypertension (I10)	k__Bacteria;p__Bacteroidetes;c__Bacteroidia;o__Bacteroidales;f__Bacteroidaceae;g__Bacteroides;s__Bacteroides clarus CAG:160	0.355615	1.18447e-05	0.0142784	BMI, Age, gender, usual stool type, history of antibiotic usage
Diseases	Essential (primary) hypertension (I10)	k__Bacteria;p__Proteobacteria;c__Acidithiobacillia;o__Acidithiobacillales;f__Acidithiobacillaceae;g__Acidithiobacillus;s__Acidithiobacillus ferrivorans	0.240642	1.21632e-05	0.0146273	BMI, Age, gender, usual stool type, history of antibiotic usage
Diseases	Essential (primary) hypertension (I10)	k__Bacteria;p__Bacteroidetes;c__Bacteroidia;o__Bacteroidales;f__Bacteroidaceae;g__Bacteroides;s__Bacteroides sp. AR29	0.56529	1.22488e-05	0.0147495	BMI, Age, gender, usual stool type, history of antibiotic usage
Diseases	Essential (primary) hypertension (I10)	k__Bacteria;p__Bacteroidetes;c__Bacteroidia;o__Bacteroidales;f__Bacteroidaceae;g__Bacteroides;s__Bacteroides sp. 2_1_22	0.444702	1.28607e-05	0.0153427	BMI, Age, gender, usual stool type, history of antibiotic usage
Diseases	Essential (primary) hypertension (I10)	k__Bacteria;p__Bacteroidetes;c__Bacteroidia;o__Bacteroidales;f__Bacteroidaceae;g__Bacteroides;s__Bacteroides sp. 2_1_33B	0.423432	1.29286e-05	0.0155525	BMI, Age, gender, usual stool type, history of antibiotic usage
Diseases	Essential (primary) hypertension (I10)	k__Bacteria;p__Bacteroidetes;c__Bacteroidia;o__Bacteroidales;f__Tannerellaceae;g__Parabacteroides;s__Parabacteroides sp. D25	0.4931	1.40932e-05	0.016828	BMI, Age, gender, usual stool type, history of antibiotic usage
Diseases	Essential (primary) hypertension (I10)	k__Bacteria;p__Bacteroidetes;c__Bacteroidia;o__Bacteroidales;f__Unclassified;g__Unclassified;s__Bacteroidales bacterium Barb6XT	0.32712	1.4067e-05	0.0168963	BMI, Age, gender, usual stool type, history of antibiotic usage
Diseases	Essential (primary) hypertension (I10)	k__Bacteria;p__Bacteroidetes;c__Bacteroidia;o__Bacteroidales;f__Tannerellaceae;g__Parabacteroides;s__Parabacteroides johnsonii CAG:246	0.315973	1.43837e-05	0.0172719	BMI, Age, gender, usual stool type, history of antibiotic usage
Diseases	Essential (primary) hypertension (I10)	k__Bacteria;p__Proteobacteria;c__Gammaproteobacteria;o__Pseudomonadales;f__Pseudomonadaceae;g__Pseudomonas;s__Pseudomonas syringae group genomosp. 3	0.225963	1.45327e-05	0.0174331	BMI, Age, gender, usual stool type, history of antibiotic usage
Diseases	Essential (primary) hypertension (I10)	k__Bacteria;p__Proteobacteria;c__Betaproteobacteria;o__Burkholderiales;f__Unclassified;g__Unclassified;s__Burkholderiales bacterium	0.664734	1.50761e-05	0.0180428	BMI, Age, gender, usual stool type, history of antibiotic usage
Diseases	Essential (primary) hypertension (I10)	k__Bacteria;p__Bacteroidetes;c__Bacteroidia;o__Bacteroidales;f__Bacteroidaceae;g__Bacteroides;s__Bacteroides dorei	0.43603	1.54522e-05	0.0185229	BMI, Age, gender, usual stool type, history of antibiotic usage
Diseases	Essential (primary) hypertension (I10)	k__Bacteria;p__Bacteroidetes;c__Bacteroidia;o__Bacteroidales;f__Bacteroidaceae;g__Bacteroides;s__Bacteroides sp. 4_3_47FAA	0.471316	1.56355e-05	0.0187373	BMI, Age, gender, usual stool type, history of antibiotic usage
Diseases	Essential (primary) hypertension (I10)	k__Bacteria;p__Bacteroidetes;c__Bacteroidia;o__Bacteroidales;f__Bacteroidaceae;g__Bacteroides;s__Bacteroides uniformis CAG:3	0.393674	1.82451e-05	0.0217803	BMI, Age, gender, usual stool type, history of antibiotic usage
Diseases	Essential (primary) hypertension (I10)	k__Bacteria;p__Bacteroidetes;c__Bacteroidia;o__Bacteroidales;f__Bacteroidaceae;g__Bacteroides;s__Bacteroides uniformis	0.421714	1.82829e-05	0.0218287	BMI, Age, gender, usual stool type, history of antibiotic usage
Diseases	Essential (primary) hypertension (I10)	k__Bacteria;p__Bacteroidetes;c__Bacteroidia;o__Bacteroidales;f__Bacteroidaceae;g__Bacteroides;s__Bacteroides stercoris CAG:120	0.356222	1.93122e-05	0.0230256	BMI, Age, gender, usual stool type, history of antibiotic usage
Diseases	Essential (primary) hypertension (I10)	k__Bacteria;p__Bacteroidetes;c__Bacteroidia;o__Bacteroidales;f__Bacteroidaceae;g__Bacteroides;s__Bacteroides sp. AM56-10ce	0.5524	1.99881e-05	0.0237229	BMI, Age, gender, usual stool type, history of antibiotic usage
Diseases	Essential (primary) hypertension (I10)	k__Bacteria;p__Firmicutes;c__Clostridia;o__Clostridiales;f__Clostridiaceae;g__Clostridium;s__Clostridium sp. CAG:524	-0.935085	2.05391e-05	0.0243045	BMI, Age, gender, usual stool type, history of antibiotic usage
Diseases	Essential (primary) hypertension (I10)	k__Bacteria;p__Bacteroidetes;c__Bacteroidia;o__Bacteroidales;f__Bacteroidaceae;g__Bacteroides;s__Bacteroides sartorii	0.41566	2.04946e-05	0.024398	BMI, Age, gender, usual stool type, history of antibiotic usage
Diseases	Essential (primary) hypertension (I10)	k__Bacteria;p__Proteobacteria;c__Gammaproteobacteria;o__Pseudomonadales;f__Pseudomonadaceae;g__Pseudomonas;s__Pseudomonas fluorescens	0.176191	2.06049e-05	0.0245006	BMI, Age, gender, usual stool type, history of antibiotic usage
Diseases	Essential (primary) hypertension (I10)	k__Eukaryota;p__Streptophyta;c__Liliopsida;o__Poales;f__Poaceae;g__Zea;s__Zea mays	0.216123	2.0782e-05	0.0247056	BMI, Age, gender, usual stool type, history of antibiotic usage
Diseases	Essential (primary) hypertension (I10)	k__Bacteria;p__Bacteroidetes;c__Bacteroidia;o__Bacteroidales;f__Bacteroidaceae;g__Bacteroides;s__Bacteroides vulgatus	0.426334	2.11842e-05	0.0251943	BMI, Age, gender, usual stool type, history of antibiotic usage
Diseases	Essential (primary) hypertension (I10)	k__Bacteria;p__Firmicutes;c__Clostridia;o__Thermoanaerobacterales;f__Thermoanaerobacteraceae;g__Moorella;s__Moorella thermoacetica	0.168126	2.65021e-05	0.0313343	BMI, Age, gender, usual stool type, history of antibiotic usage
Diseases	Essential (primary) hypertension (I10)	k__Bacteria;p__Bacteroidetes;c__Bacteroidia;o__Bacteroidales;f__Tannerellaceae;g__Parabacteroides;s__Parabacteroides sp. CAG:2	0.369921	2.74855e-05	0.0325	BMI, Age, gender, usual stool type, history of antibiotic usage
Diseases	Essential (primary) hypertension (I10)	k__Bacteria;p__Firmicutes;c__Clostridia;o__Clostridiales;f__Ruminococcaceae;g__Faecalibacterium;s__Faecalibacterium sp. CAG:1138	-0.59859	2.87318e-05	0.0339182	BMI, Age, gender, usual stool type, history of antibiotic usage
Diseases	Essential (primary) hypertension (I10)	k__Bacteria;p__Proteobacteria;c__Unclassified;o__Unclassified;f__Unclassified;g__Unclassified;s__Proteobacteria bacterium CAG:139	0.610627	2.88486e-05	0.034061	BMI, Age, gender, usual stool type, history of antibiotic usage
Diseases	Essential (primary) hypertension (I10)	k__Bacteria;p__Firmicutes;c__Clostridia;o__Clostridiales;f__Clostridiaceae;g__Clostridium;s__Clostridium sp. CAG:58	0.307233	2.97195e-05	0.0350732	BMI, Age, gender, usual stool type, history of antibiotic usage
Diseases	Essential (primary) hypertension (I10)	k__Bacteria;p__Firmicutes;c__Clostridia;o__Clostridiales;f__Clostridiaceae;g__Clostridium;s__Clostridium sp. CAG:1193	-0.980121	3.11499e-05	0.0363918	BMI, Age, gender, usual stool type, history of antibiotic usage
Diseases	Essential (primary) hypertension (I10)	k__Bacteria;p__Bacteroidetes;c__Bacteroidia;o__Bacteroidales;f__Bacteroidaceae;g__Bacteroides;s__Bacteroides fluxus	0.341667	3.355e-05	0.0394925	BMI, Age, gender, usual stool type, history of antibiotic usage
Diseases	Essential (primary) hypertension (I10)	k__Bacteria;p__Proteobacteria;c__Alphaproteobacteria;o__Rhodospirillales;f__Rhodospirillaceae;g__Nitrospirillum;s__Nitrospirillum amazonense	0.194183	3.401e-05	0.039983	BMI, Age, gender, usual stool type, history of antibiotic usage
Diseases	Essential (primary) hypertension (I10)	k__Bacteria;p__Proteobacteria;c__Gammaproteobacteria;o__Pseudomonadales;f__Pseudomonadaceae;g__Pseudomonas;s__Pseudomonas syringae	0.16571	3.42739e-05	0.0402652	BMI, Age, gender, usual stool type, history of antibiotic usage
Diseases	Essential (primary) hypertension (I10)	k__Bacteria;p__Bacteroidetes;c__Bacteroidia;o__Bacteroidales;f__Bacteroidaceae;g__Bacteroides;s__Bacteroides sp. 1_1_30	0.41111	3.43339e-05	0.0403378	BMI, Age, gender, usual stool type, history of antibiotic usage
Diseases	Essential (primary) hypertension (I10)	k__Bacteria;p__Bacteroidetes;c__Bacteroidia;o__Bacteroidales;f__Unclassified;g__Unclassified;s__Bacteroidales bacterium Barb6	0.302546	3.57857e-05	0.0420478	BMI, Age, gender, usual stool type, history of antibiotic usage
Diseases	Essential (primary) hypertension (I10)	k__Bacteria;p__Bacteroidetes;c__Flavobacteriia;o__Flavobacteriales;f__Flavobacteriaceae;g__Ornithobacterium;s__Ornithobacterium rhinotracheale	0.319478	3.64527e-05	0.0427965	BMI, Age, gender, usual stool type, history of antibiotic usage
Diseases	Essential (primary) hypertension (I10)	k__Bacteria;p__Firmicutes;c__Clostridia;o__Clostridiales;f__Oscillospiraceae;g__Oscillibacter;s__Oscillibacter sp. KLE 1728	0.288729	3.66416e-05	0.0429858	BMI, Age, gender, usual stool type, history of antibiotic usage
Diseases	Essential (primary) hypertension (I10)	k__Bacteria;p__Proteobacteria;c__Alphaproteobacteria;o__Rhizobiales;f__Rhizobiaceae;g__Agrobacterium;s__Agrobacterium tumefaciens	0.240901	3.76957e-05	0.0440357	BMI, Age, gender, usual stool type, history of antibiotic usage
Diseases	Essential (primary) hypertension (I10)	k__Bacteria;p__Proteobacteria;c__Gammaproteobacteria;o__Enterobacterales;f__Enterobacteriaceae;g__Cronobacter;s__Cronobacter universalis	0.279494	4.05761e-05	0.0474201	BMI, Age, gender, usual stool type, history of antibiotic usage
Diseases	Essential (primary) hypertension (I10)	k__Bacteria;p__Proteobacteria;c__Betaproteobacteria;o__Burkholderiales;f__Sutterellaceae;g__Parasutterella;s__Parasutterella excrementihominis	0.521785	4.24996e-05	0.0496692	BMI, Age, gender, usual stool type, history of antibiotic usage
Diseases	Gastritis and duodenitis (K29)	k__Bacteria;p__Bacteroidetes;c__Bacteroidia;o__Bacteroidales;f__Bacteroidaceae;g__Bacteroides;s__Bacteroides sp. AF27-10BH	0.534287	2.17525e-05	0.0267773	BMI, Age, gender, usual stool type
Diseases	Gastro-esophageal reflux disease (K21)	k__Bacteria;p__Bacteroidetes;c__Bacteroidia;o__Bacteroidales;f__Bacteroidaceae;g__Bacteroides;s__Bacteroides faecichinchillae	0.402786	1.15384e-07	0.000142038	BMI, Age, gender, usual stool type
Diseases	Gastro-esophageal reflux disease (K21)	k__Bacteria;p__Bacteroidetes;c__Bacteroidia;o__Bacteroidales;f__Bacteroidaceae;g__Bacteroides;s__Bacteroides cellulosilyticus CAG:158	0.368448	1.60713e-06	0.00197594	BMI, Age, gender, usual stool type
Diseases	Gastro-esophageal reflux disease (K21)	k__Bacteria;p__Bacteroidetes;c__Bacteroidia;o__Bacteroidales;f__Tannerellaceae;g__Parabacteroides;s__Parabacteroides sp. D25	0.505335	2.03552e-06	0.00249961	BMI, Age, gender, usual stool type
Diseases	Gastro-esophageal reflux disease (K21)	k__Bacteria;p__Bacteroidetes;c__Bacteroidia;o__Bacteroidales;f__Bacteroidaceae;g__Bacteroides;s__Bacteroides ovatus CAG:22	0.367764	4.0646e-06	0.00498689	BMI, Age, gender, usual stool type
Diseases	Gastro-esophageal reflux disease (K21)	k__Bacteria;p__Firmicutes;c__Clostridia;o__Clostridiales;f__Clostridiaceae;g__Clostridium;s__Clostridium sp. CAG:43	0.231863	4.16343e-06	0.00510679	BMI, Age, gender, usual stool type
Diseases	Gastro-esophageal reflux disease (K21)	k__Bacteria;p__Bacteroidetes;c__Bacteroidia;o__Bacteroidales;f__Bacteroidaceae;g__Bacteroides;s__Bacteroides oleiciplenus	0.4226	4.60935e-06	0.00565057	BMI, Age, gender, usual stool type
Diseases	Gastro-esophageal reflux disease (K21)	k__Bacteria;p__Bacteroidetes;c__Bacteroidia;o__Bacteroidales;f__Tannerellaceae;g__Parabacteroides;s__Parabacteroides sp. AM17-47	0.324368	4.83671e-06	0.00592751	BMI, Age, gender, usual stool type
Diseases	Gastro-esophageal reflux disease (K21)	k__Bacteria;p__Bacteroidetes;c__Bacteroidia;o__Bacteroidales;f__Porphyromonadaceae;g__Porphyromonas;s__Porphyromonas sp. 31_2	0.427743	7.50987e-06	0.0091858	BMI, Age, gender, usual stool type
Diseases	Gastro-esophageal reflux disease (K21)	k__Bacteria;p__Bacteroidetes;c__Bacteroidia;o__Bacteroidales;f__Bacteroidaceae;g__Bacteroides;s__Bacteroides sp. 9_1_42FAA	0.335084	7.96873e-06	0.00974579	BMI, Age, gender, usual stool type
Diseases	Gastro-esophageal reflux disease (K21)	k__Bacteria;p__Bacteroidetes;c__Bacteroidia;o__Bacteroidales;f__Tannerellaceae;g__Parabacteroides;s__Parabacteroides merdae CAG:48	0.301118	1.01597e-05	0.0124056	BMI, Age, gender, usual stool type
Diseases	Gastro-esophageal reflux disease (K21)	k__Bacteria;p__Bacteroidetes;c__Bacteroidia;o__Bacteroidales;f__Tannerellaceae;g__Parabacteroides;s__Parabacteroides sp. CAG:2	0.361392	1.19544e-05	0.014576	BMI, Age, gender, usual stool type
Diseases	Gastro-esophageal reflux disease (K21)	k__Bacteria;p__Bacteroidetes;c__Bacteroidia;o__Bacteroidales;f__Tannerellaceae;g__Parabacteroides;s__Parabacteroides merdae	0.465056	1.24362e-05	0.0151613	BMI, Age, gender, usual stool type
Diseases	Gastro-esophageal reflux disease (K21)	k__Bacteria;p__Bacteroidetes;c__Bacteroidia;o__Bacteroidales;f__Tannerellaceae;g__Parabacteroides;s__Parabacteroides distasonis	0.330373	1.44228e-05	0.017553	BMI, Age, gender, usual stool type
Diseases	Gastro-esophageal reflux disease (K21)	k__Bacteria;p__Bacteroidetes;c__Bacteroidia;o__Bacteroidales;f__Tannerellaceae;g__Parabacteroides;s__Parabacteroides johnsonii CAG:246	0.295144	1.47601e-05	0.0179588	BMI, Age, gender, usual stool type
Diseases	Gastro-esophageal reflux disease (K21)	k__Bacteria;p__Proteobacteria;c__Betaproteobacteria;o__Burkholderiales;f__Oxalobacteraceae;g__Unclassified;s__Oxalobacteraceae bacterium IMCC9480	0.286269	1.49276e-05	0.0181486	BMI, Age, gender, usual stool type
Diseases	Gastro-esophageal reflux disease (K21)	k__Bacteria;p__Firmicutes;c__Clostridia;o__Clostridiales;f__Oscillospiraceae;g__Oscillibacter;s__Oscillibacter sp. KLE 1745	0.385619	1.62543e-05	0.0197017	BMI, Age, gender, usual stool type
Diseases	Gastro-esophageal reflux disease (K21)	k__Bacteria;p__Bacteroidetes;c__Bacteroidia;o__Bacteroidales;f__Bacteroidaceae;g__Bacteroides;s__Bacteroides fragilis	0.35047	1.67918e-05	0.0204	BMI, Age, gender, usual stool type
Diseases	Gastro-esophageal reflux disease (K21)	k__Bacteria;p__Bacteroidetes;c__Bacteroidia;o__Bacteroidales;f__Unclassified;g__Unclassified;s__Bacteroidales bacterium Barb6	0.291358	2.037e-05	0.0246784	BMI, Age, gender, usual stool type
Diseases	Gastro-esophageal reflux disease (K21)	k__Bacteria;p__Bacteroidetes;c__Bacteroidia;o__Bacteroidales;f__Bacteroidaceae;g__Bacteroides;s__Bacteroides vulgatus	0.400378	2.0827e-05	0.0252315	BMI, Age, gender, usual stool type
Diseases	Gastro-esophageal reflux disease (K21)	k__Bacteria;p__Bacteroidetes;c__Bacteroidia;o__Bacteroidales;f__Tannerellaceae;g__Parabacteroides;s__Parabacteroides sp. D13	0.347965	2.0896e-05	0.0253031	BMI, Age, gender, usual stool type
Diseases	Gastro-esophageal reflux disease (K21)	k__Bacteria;p__Bacteroidetes;c__Bacteroidia;o__Bacteroidales;f__Bacteroidaceae;g__Bacteroides;s__Bacteroides intestinalis CAG:315	0.356652	2.16997e-05	0.0262575	BMI, Age, gender, usual stool type
Diseases	Gastro-esophageal reflux disease (K21)	k__Bacteria;p__Bacteroidetes;c__Bacteroidia;o__Bacteroidales;f__Bacteroidaceae;g__Bacteroides;s__Bacteroides thetaiotaomicron	0.369435	2.17803e-05	0.0263488	BMI, Age, gender, usual stool type
Diseases	Gastro-esophageal reflux disease (K21)	k__Bacteria;p__Bacteroidetes;c__Bacteroidia;o__Bacteroidales;f__Bacteroidaceae;g__Bacteroides;s__Bacteroides sp. CAG:598	0.320124	2.36321e-05	0.0285431	BMI, Age, gender, usual stool type
Diseases	Gastro-esophageal reflux disease (K21)	k__Bacteria;p__Bacteroidetes;c__Bacteroidia;o__Bacteroidales;f__Bacteroidaceae;g__Bacteroides;s__Bacteroides ovatus	0.378238	2.5635e-05	0.0309167	BMI, Age, gender, usual stool type
Diseases	Gastro-esophageal reflux disease (K21)	k__Bacteria;p__Bacteroidetes;c__Bacteroidia;o__Bacteroidales;f__Tannerellaceae;g__Tannerella;s__Tannerella sp. 6_1_58FAA_CT1	0.314709	2.65195e-05	0.0319596	BMI, Age, gender, usual stool type
Diseases	Gastro-esophageal reflux disease (K21)	k__Bacteria;p__Bacteroidetes;c__Bacteroidia;o__Bacteroidales;f__Bacteroidaceae;g__Bacteroides;s__Bacteroides finegoldii	0.413223	2.857e-05	0.0343891	BMI, Age, gender, usual stool type
Diseases	Gastro-esophageal reflux disease (K21)	k__Bacteria;p__Bacteroidetes;c__Bacteroidia;o__Bacteroidales;f__Bacteroidaceae;g__Bacteroides;s__Bacteroides sp. 2_2_4	0.401373	2.87601e-05	0.0346031	BMI, Age, gender, usual stool type
Diseases	Gastro-esophageal reflux disease (K21)	k__Bacteria;p__Bacteroidetes;c__Bacteroidia;o__Bacteroidales;f__Bacteroidaceae;g__Bacteroides;s__Bacteroides uniformis CAG:3	0.357939	3.19128e-05	0.0383084	BMI, Age, gender, usual stool type
Diseases	Gastro-esophageal reflux disease (K21)	k__Bacteria;p__Lentisphaerae;c__Unclassified;o__Unclassified;f__Unclassified;g__Unclassified;s__Lentisphaerae bacterium	-0.626857	3.27282e-05	0.0389085	BMI, Age, gender, usual stool type
Diseases	Gastro-esophageal reflux disease (K21)	k__Bacteria;p__Bacteroidetes;c__Bacteroidia;o__Bacteroidales;f__Bacteroidaceae;g__Bacteroides;s__Bacteroides sp. 3_1_23	0.342793	3.28162e-05	0.0393492	BMI, Age, gender, usual stool type
Diseases	Gastro-esophageal reflux disease (K21)	k__Bacteria;p__Bacteroidetes;c__Bacteroidia;o__Bacteroidales;f__Bacteroidaceae;g__Bacteroides;s__Bacteroides intestinalis	0.362165	3.29048e-05	0.0394715	BMI, Age, gender, usual stool type
Diseases	Gastro-esophageal reflux disease (K21)	k__Bacteria;p__Unclassified;c__Unclassified;o__Unclassified;f__Unclassified;g__Unclassified;s__uncultured bacterium	0.222992	3.40025e-05	0.0407466	BMI, Age, gender, usual stool type
Diseases	Gastro-esophageal reflux disease (K21)	k__Bacteria;p__Bacteroidetes;c__Bacteroidia;o__Bacteroidales;f__Bacteroidaceae;g__Bacteroides;s__Bacteroides intestinalis CAG:564	0.328739	3.4119e-05	0.0408759	BMI, Age, gender, usual stool type
Diseases	Gastro-esophageal reflux disease (K21)	k__Bacteria;p__Bacteroidetes;c__Bacteroidia;o__Bacteroidales;f__Bacteroidaceae;g__Bacteroides;s__Bacteroides thetaiotaomicron CAG:40	0.355937	3.66909e-05	0.0438696	BMI, Age, gender, usual stool type
Diseases	Gastro-esophageal reflux disease (K21)	k__Bacteria;p__Bacteroidetes;c__Bacteroidia;o__Bacteroidales;f__Bacteroidaceae;g__Bacteroides;s__Bacteroides dorei	0.391796	3.8263e-05	0.0456986	BMI, Age, gender, usual stool type
Diseases	Gastro-esophageal reflux disease (K21)	k__Bacteria;p__Bacteroidetes;c__Bacteroidia;o__Bacteroidales;f__Bacteroidaceae;g__Bacteroides;s__Bacteroides sp. 1_1_30	0.382598	3.95028e-05	0.0471271	BMI, Age, gender, usual stool type
Diseases	Gastro-esophageal reflux disease (K21)	k__Bacteria;p__Bacteroidetes;c__Bacteroidia;o__Bacteroidales;f__Bacteroidaceae;g__Bacteroides;s__Bacteroides sp. 4_3_47FAA	0.422525	3.95747e-05	0.0472139	BMI, Age, gender, usual stool type
Diseases	Gastro-esophageal reflux disease (K21)	k__Bacteria;p__Bacteroidetes;c__Bacteroidia;o__Bacteroidales;f__Bacteroidaceae;g__Bacteroides;s__Bacteroides clarus CAG:160	0.312049	4.10785e-05	0.0489482	BMI, Age, gender, usual stool type
Diseases	Gastro-esophageal reflux disease (K21)	k__Bacteria;p__Bacteroidetes;c__Bacteroidia;o__Bacteroidales;f__Bacteroidaceae;g__Bacteroides;s__Bacteroides faecichinchillae	0.314598	3.20385e-05	0.0394389	BMI, Age, gender, usual stool type, history of antibiotic usage
Diseases	Gout (M10)	k__Bacteria;p__Bacteroidetes;c__Bacteroidia;o__Bacteroidales;f__Tannerellaceae;g__Parabacteroides;s__Parabacteroides distasonis	1.14624	5.65474e-10	6.95942e-07	BMI, Age, gender, usual stool type
Diseases	Gout (M10)	k__Bacteria;p__Bacteroidetes;c__Bacteroidia;o__Bacteroidales;f__Tannerellaceae;g__Parabacteroides;s__Parabacteroides sp. D13	1.20463	1.28766e-09	1.58311e-06	BMI, Age, gender, usual stool type
Diseases	Gout (M10)	k__Bacteria;p__Bacteroidetes;c__Bacteroidia;o__Bacteroidales;f__Bacteroidaceae;g__Bacteroides;s__Bacteroides ovatus	1.28406	3.98171e-09	4.8875e-06	BMI, Age, gender, usual stool type
Diseases	Gout (M10)	k__Bacteria;p__Bacteroidetes;c__Bacteroidia;o__Bacteroidales;f__Bacteroidaceae;g__Bacteroides;s__Bacteroides sp. 2_1_33B	1.29331	4.74869e-09	5.82443e-06	BMI, Age, gender, usual stool type
Diseases	Gout (M10)	k__Bacteria;p__Proteobacteria;c__Gammaproteobacteria;o__Pseudomonadales;f__Pseudomonadaceae;g__Pseudomonas;s__Pseudomonas chlororaphis	1.37994	6.04823e-09	7.40474e-06	BMI, Age, gender, usual stool type
Diseases	Gout (M10)	k__Bacteria;p__Bacteroidetes;c__Bacteroidia;o__Bacteroidales;f__Bacteroidaceae;g__Bacteroides;s__Bacteroides sp. 2_2_4	1.34727	7.38252e-09	9.03883e-06	BMI, Age, gender, usual stool type
Diseases	Gout (M10)	k__Bacteria;p__Bacteroidetes;c__Bacteroidia;o__Bacteroidales;f__Bacteroidaceae;g__Bacteroides;s__Bacteroides faecis CAG:32	1.145	8.75839e-09	1.07058e-05	BMI, Age, gender, usual stool type
Diseases	Gout (M10)	k__Bacteria;p__Bacteroidetes;c__Bacteroidia;o__Bacteroidales;f__Tannerellaceae;g__Parabacteroides;s__Parabacteroides sp. 20_3	1.21689	1.001e-08	1.2212e-05	BMI, Age, gender, usual stool type
Diseases	Gout (M10)	k__Bacteria;p__Bacteroidetes;c__Bacteroidia;o__Bacteroidales;f__Bacteroidaceae;g__Bacteroides;s__Bacteroides sp. 3_1_40A	1.36854	1.03989e-08	1.26828e-05	BMI, Age, gender, usual stool type
Diseases	Gout (M10)	k__Bacteria;p__Proteobacteria;c__Gammaproteobacteria;o__Pseudomonadales;f__Moraxellaceae;g__Acinetobacter;s__Acinetobacter baumannii	0.6523	1.06363e-08	1.29604e-05	BMI, Age, gender, usual stool type
Diseases	Gout (M10)	k__Bacteria;p__Bacteroidetes;c__Bacteroidia;o__Bacteroidales;f__Odoribacteraceae;g__Odoribacter;s__Odoribacter splanchnicus	1.04648	1.08525e-08	1.32261e-05	BMI, Age, gender, usual stool type
Diseases	Gout (M10)	k__Bacteria;p__Bacteroidetes;c__Bacteroidia;o__Bacteroidales;f__Bacteroidaceae;g__Bacteroides;s__Bacteroides fragilis	1.13001	1.1112e-08	1.35327e-05	BMI, Age, gender, usual stool type
Diseases	Gout (M10)	k__Bacteria;p__Proteobacteria;c__Betaproteobacteria;o__Burkholderiales;f__Alcaligenaceae;g__Bordetella;s__Bordetella pertussis	0.609871	1.22174e-08	1.48545e-05	BMI, Age, gender, usual stool type
Diseases	Gout (M10)	k__Bacteria;p__Bacteroidetes;c__Bacteroidia;o__Bacteroidales;f__Bacteroidaceae;g__Bacteroides;s__Bacteroides sp. 3_1_19	1.40747	1.22862e-08	1.49408e-05	BMI, Age, gender, usual stool type
Diseases	Gout (M10)	k__Bacteria;p__Bacteroidetes;c__Bacteroidia;o__Bacteroidales;f__Bacteroidaceae;g__Bacteroides;s__Bacteroides fragilis CAG:558	1.03403	1.24224e-08	1.51011e-05	BMI, Age, gender, usual stool type
Diseases	Gout (M10)	k__Bacteria;p__Firmicutes;c__Unclassified;o__Unclassified;f__Unclassified;g__Unclassified;s__Firmicutes bacterium CAG:176_59_8	-1.81712	1.24942e-08	1.51125e-05	BMI, Age, gender, usual stool type
Diseases	Gout (M10)	k__Bacteria;p__Bacteroidetes;c__Bacteroidia;o__Bacteroidales;f__Bacteroidaceae;g__Bacteroides;s__Bacteroides nordii	1.02587	1.29518e-08	1.57357e-05	BMI, Age, gender, usual stool type
Diseases	Gout (M10)	k__Bacteria;p__Firmicutes;c__Unclassified;o__Unclassified;f__Unclassified;g__Unclassified;s__Firmicutes bacterium CAG:176_63_11	-1.55427	1.53318e-08	1.86058e-05	BMI, Age, gender, usual stool type
Diseases	Gout (M10)	k__Bacteria;p__Bacteroidetes;c__Bacteroidia;o__Bacteroidales;f__Porphyromonadaceae;g__Porphyromonas;s__Porphyromonas sp. 31_2	1.31207	1.67804e-08	2.0346e-05	BMI, Age, gender, usual stool type
Diseases	Gout (M10)	k__Bacteria;p__Bacteroidetes;c__Bacteroidia;o__Bacteroidales;f__Bacteroidaceae;g__Bacteroides;s__Bacteroides faecichinchillae	1.03912	1.87714e-08	2.27383e-05	BMI, Age, gender, usual stool type
Diseases	Gout (M10)	k__Bacteria;p__Firmicutes;c__Clostridia;o__Clostridiales;f__Lachnospiraceae;g__Blautia;s__Blautia sp. CAG:237	0.873913	2.99549e-08	3.61874e-05	BMI, Age, gender, usual stool type
Diseases	Gout (M10)	k__Bacteria;p__Bacteroidetes;c__Bacteroidia;o__Bacteroidales;f__Bacteroidaceae;g__Bacteroides;s__Bacteroides sp. OM05-10AA	1.38789	3.31218e-08	3.99903e-05	BMI, Age, gender, usual stool type
Diseases	Gout (M10)	k__Bacteria;p__Bacteroidetes;c__Bacteroidia;o__Bacteroidales;f__Tannerellaceae;g__Parabacteroides;s__Parabacteroides sp. CAG:2	1.10021	4.09814e-08	4.93841e-05	BMI, Age, gender, usual stool type
Diseases	Gout (M10)	k__Bacteria;p__Bacteroidetes;c__Bacteroidia;o__Bacteroidales;f__Bacteroidaceae;g__Bacteroides;s__Bacteroides sp. 1_1_30	1.23982	4.16573e-08	5.01977e-05	BMI, Age, gender, usual stool type
Diseases	Gout (M10)	k__Bacteria;p__Bacteroidetes;c__Bacteroidia;o__Bacteroidales;f__Bacteroidaceae;g__Bacteroides;s__Bacteroides dorei	1.26582	4.34502e-08	5.23486e-05	BMI, Age, gender, usual stool type
Diseases	Gout (M10)	k__Bacteria;p__Bacteroidetes;c__Bacteroidia;o__Bacteroidales;f__Bacteroidaceae;g__Bacteroides;s__Bacteroides sp. D2	1.47452	4.50032e-08	5.41285e-05	BMI, Age, gender, usual stool type
Diseases	Gout (M10)	k__Bacteria;p__Proteobacteria;c__Gammaproteobacteria;o__Chromatiales;f__Chromatiaceae;g__Thiocapsa;s__Thiocapsa sp. KS1	0.601652	5.27607e-08	6.33221e-05	BMI, Age, gender, usual stool type
Diseases	Gout (M10)	k__Bacteria;p__Bacteroidetes;c__Bacteroidia;o__Bacteroidales;f__Bacteroidaceae;g__Bacteroides;s__Bacteroides clarus	1.33037	5.67579e-08	6.811e-05	BMI, Age, gender, usual stool type
Diseases	Gout (M10)	k__Bacteria;p__Bacteroidetes;c__Bacteroidia;o__Bacteroidales;f__Bacteroidaceae;g__Bacteroides;s__Bacteroides sp. 9_1_42FAA	0.989842	5.69433e-08	6.83236e-05	BMI, Age, gender, usual stool type
Diseases	Gout (M10)	k__Bacteria;p__Bacteroidetes;c__Bacteroidia;o__Bacteroidales;f__Bacteroidaceae;g__Bacteroides;s__Bacteroides thetaiotaomicron CAG:40	1.13641	5.82226e-08	6.98256e-05	BMI, Age, gender, usual stool type
Diseases	Gout (M10)	k__Bacteria;p__Bacteroidetes;c__Bacteroidia;o__Bacteroidales;f__Rikenellaceae;g__Alistipes;s__Alistipes finegoldii CAG:68	0.828485	6.28285e-08	7.52431e-05	BMI, Age, gender, usual stool type
Diseases	Gout (M10)	k__Bacteria;p__Bacteroidetes;c__Bacteroidia;o__Bacteroidales;f__Bacteroidaceae;g__Bacteroides;s__Bacteroides sp. D22	1.34091	6.569e-08	7.85883e-05	BMI, Age, gender, usual stool type
Diseases	Gout (M10)	k__Bacteria;p__Bacteroidetes;c__Bacteroidia;o__Bacteroidales;f__Rikenellaceae;g__Alistipes;s__Alistipes finegoldii	1.24548	7.05568e-08	8.42973e-05	BMI, Age, gender, usual stool type
Diseases	Gout (M10)	k__Bacteria;p__Bacteroidetes;c__Bacteroidia;o__Bacteroidales;f__Bacteroidaceae;g__Bacteroides;s__Bacteroides dorei CAG:222	1.09912	7.23964e-08	8.64518e-05	BMI, Age, gender, usual stool type
Diseases	Gout (M10)	k__Bacteria;p__Bacteroidetes;c__Bacteroidia;o__Bacteroidales;f__Bacteroidaceae;g__Bacteroides;s__Bacteroides sp. 3_1_23	1.07755	7.7355e-08	9.22775e-05	BMI, Age, gender, usual stool type
Diseases	Gout (M10)	k__Bacteria;p__Proteobacteria;c__Gammaproteobacteria;o__Pseudomonadales;f__Pseudomonadaceae;g__Pseudomonas;s__Pseudomonas syringae group genomosp. 3	0.634842	8.28928e-08	9.87001e-05	BMI, Age, gender, usual stool type
Diseases	Gout (M10)	k__Bacteria;p__Proteobacteria;c__Alphaproteobacteria;o__Rhodospirillales;f__Rhodospirillaceae;g__Nitrospirillum;s__Nitrospirillum amazonense	0.570931	8.46837e-08	0.000100758	BMI, Age, gender, usual stool type
Diseases	Gout (M10)	k__Bacteria;p__Proteobacteria;c__Gammaproteobacteria;o__Xanthomonadales;f__Xanthomonadaceae;g__Stenotrophomonas;s__Stenotrophomonas maltophilia	0.683543	8.94957e-08	0.000106215	BMI, Age, gender, usual stool type
Diseases	Gout (M10)	k__Bacteria;p__Bacteroidetes;c__Bacteroidia;o__Bacteroidales;f__Rikenellaceae;g__Alistipes;s__Alistipes sp. 58_9_plus	1.07433	9.32747e-08	0.000110856	BMI, Age, gender, usual stool type
Diseases	Gout (M10)	k__Bacteria;p__Bacteroidetes;c__Bacteroidia;o__Bacteroidales;f__Bacteroidaceae;g__Bacteroides;s__Bacteroides sp. HMSC068A09	1.47629	9.6507e-08	0.000114568	BMI, Age, gender, usual stool type
Diseases	Gout (M10)	k__Bacteria;p__Proteobacteria;c__Gammaproteobacteria;o__Enterobacterales;f__Enterobacteriaceae;g__Cronobacter;s__Cronobacter dublinensis	0.749279	1.02373e-07	0.000121421	BMI, Age, gender, usual stool type
Diseases	Gout (M10)	k__Bacteria;p__Bacteroidetes;c__Bacteroidia;o__Bacteroidales;f__Rikenellaceae;g__Alistipes;s__Alistipes sp. HGB5	1.19348	1.04452e-07	0.000123894	BMI, Age, gender, usual stool type
Diseases	Gout (M10)	k__Bacteria;p__Bacteroidetes;c__Bacteroidia;o__Bacteroidales;f__Bacteroidaceae;g__Bacteroides;s__Bacteroides clarus CAG:160	0.981481	1.10249e-07	0.000130654	BMI, Age, gender, usual stool type
Diseases	Gout (M10)	k__Bacteria;p__Firmicutes;c__Unclassified;o__Unclassified;f__Unclassified;g__Unclassified;s__Firmicutes bacterium CAG:272_52_7	-1.90501	1.18258e-07	0.000133597	BMI, Age, gender, usual stool type
Diseases	Gout (M10)	k__Bacteria;p__Bacteroidetes;c__Bacteroidia;o__Bacteroidales;f__Unclassified;g__Unclassified;s__Bacteroidales bacterium Barb7	0.843407	1.15941e-07	0.000137215	BMI, Age, gender, usual stool type
Diseases	Gout (M10)	k__Bacteria;p__Proteobacteria;c__Gammaproteobacteria;o__Oceanospirillales;f__Halomonadaceae;g__Zymobacter;s__Zymobacter palmae	0.688558	1.17306e-07	0.000138716	BMI, Age, gender, usual stool type
Diseases	Gout (M10)	k__Bacteria;p__Proteobacteria;c__Betaproteobacteria;o__Burkholderiales;f__Alcaligenaceae;g__Achromobacter;s__Achromobacter xylosoxidans	0.629324	1.19695e-07	0.000141291	BMI, Age, gender, usual stool type
Diseases	Gout (M10)	k__Eukaryota;p__Arthropoda;c__Arachnida;o__Araneae;f__Araneidae;g__Nephila;s__Nephila clavipes	0.509296	1.24255e-07	0.000146543	BMI, Age, gender, usual stool type
Diseases	Gout (M10)	k__Bacteria;p__Bacteroidetes;c__Bacteroidia;o__Bacteroidales;f__Bacteroidaceae;g__Bacteroides;s__Bacteroides thetaiotaomicron	1.11774	1.25228e-07	0.000147903	BMI, Age, gender, usual stool type
Diseases	Gout (M10)	k__Bacteria;p__Bacteroidetes;c__Bacteroidia;o__Bacteroidales;f__Bacteroidaceae;g__Bacteroides;s__Bacteroides fragilis CAG:47	1.01645	1.30031e-07	0.000153372	BMI, Age, gender, usual stool type
Diseases	Gout (M10)	k__Bacteria;p__Proteobacteria;c__Gammaproteobacteria;o__Enterobacterales;f__Enterobacteriaceae;g__Cronobacter;s__Cronobacter sakazakii	0.585029	1.33017e-07	0.000156712	BMI, Age, gender, usual stool type
Diseases	Gout (M10)	k__Bacteria;p__Bacteroidetes;c__Bacteroidia;o__Bacteroidales;f__Bacteroidaceae;g__Bacteroides;s__Bacteroides caccae CAG:21	0.952787	1.36251e-07	0.000160514	BMI, Age, gender, usual stool type
Diseases	Gout (M10)	k__Bacteria;p__Bacteroidetes;c__Bacteroidia;o__Bacteroidales;f__Bacteroidaceae;g__Bacteroides;s__Bacteroides xylanisolvens	0.862041	1.40182e-07	0.000165044	BMI, Age, gender, usual stool type
Diseases	Gout (M10)	k__Bacteria;p__Bacteroidetes;c__Bacteroidia;o__Bacteroidales;f__Tannerellaceae;g__Parabacteroides;s__Parabacteroides johnsonii CAG:246	0.869627	1.5095e-07	0.000177362	BMI, Age, gender, usual stool type
Diseases	Gout (M10)	k__Bacteria;p__Bacteroidetes;c__Flavobacteriia;o__Flavobacteriales;f__Flavobacteriaceae;g__Ornithobacterium;s__Ornithobacterium rhinotracheale	0.925316	1.56838e-07	0.000184037	BMI, Age, gender, usual stool type
Diseases	Gout (M10)	k__Bacteria;p__Bacteroidetes;c__Bacteroidia;o__Bacteroidales;f__Tannerellaceae;g__Parabacteroides;s__Parabacteroides johnsonii	1.18706	1.67606e-07	0.000196393	BMI, Age, gender, usual stool type
Diseases	Gout (M10)	k__Bacteria;p__Bacteroidetes;c__Bacteroidia;o__Bacteroidales;f__Bacteroidaceae;g__Bacteroides;s__Bacteroides intestinalis CAG:315	1.06614	1.75968e-07	0.000205933	BMI, Age, gender, usual stool type
Diseases	Gout (M10)	k__Bacteria;p__Bacteroidetes;c__Bacteroidia;o__Bacteroidales;f__Unclassified;g__Unclassified;s__Bacteroidales bacterium Barb6XT	0.892719	1.80092e-07	0.000210559	BMI, Age, gender, usual stool type
Diseases	Gout (M10)	k__Bacteria;p__Bacteroidetes;c__Bacteroidia;o__Bacteroidales;f__Tannerellaceae;g__Parabacteroides;s__Parabacteroides merdae CAG:48	0.865109	1.82702e-07	0.000213573	BMI, Age, gender, usual stool type
Diseases	Gout (M10)	k__Bacteria;p__Bacteroidetes;c__Bacteroidia;o__Bacteroidales;f__Bacteroidaceae;g__Bacteroides;s__Bacteroides intestinalis CAG:564	1.00402	1.91165e-07	0.00022317	BMI, Age, gender, usual stool type
Diseases	Gout (M10)	k__Bacteria;p__Bacteroidetes;c__Bacteroidia;o__Bacteroidales;f__Bacteroidaceae;g__Bacteroides;s__Bacteroides eggerthii CAG:109	0.925992	1.96696e-07	0.000229419	BMI, Age, gender, usual stool type
Diseases	Gout (M10)	k__Bacteria;p__Proteobacteria;c__Gammaproteobacteria;o__Pseudomonadales;f__Pseudomonadaceae;g__Pseudomonas;s__Pseudomonas aeruginosa	0.455193	2.11775e-07	0.000246487	BMI, Age, gender, usual stool type
Diseases	Gout (M10)	k__Bacteria;p__Bacteroidetes;c__Bacteroidia;o__Bacteroidales;f__Bacteroidaceae;g__Bacteroides;s__Bacteroides sp. 3_1_13	1.36045	2.15606e-07	0.000250737	BMI, Age, gender, usual stool type
Diseases	Gout (M10)	k__Bacteria;p__Proteobacteria;c__Alphaproteobacteria;o__Rhizobiales;f__Rhizobiaceae;g__Rhizobium;s__Rhizobium freirei	0.558025	2.18512e-07	0.000254149	BMI, Age, gender, usual stool type
Diseases	Gout (M10)	k__Bacteria;p__Proteobacteria;c__Betaproteobacteria;o__Burkholderiales;f__Burkholderiaceae;g__Burkholderia;s__Burkholderia pseudomallei	0.515718	2.34083e-07	0.000271782	BMI, Age, gender, usual stool type
Diseases	Gout (M10)	k__Bacteria;p__Bacteroidetes;c__Bacteroidia;o__Bacteroidales;f__Bacteroidaceae;g__Bacteroides;s__Bacteroides sartorii	1.15172	2.34948e-07	0.000272791	BMI, Age, gender, usual stool type
Diseases	Gout (M10)	k__Bacteria;p__Bacteroidetes;c__Bacteroidia;o__Bacteroidales;f__Bacteroidaceae;g__Bacteroides;s__Bacteroides sp. 4_3_47FAA	1.29155	2.36849e-07	0.000274962	BMI, Age, gender, usual stool type
Diseases	Gout (M10)	k__Bacteria;p__Bacteroidetes;c__Bacteroidia;o__Bacteroidales;f__Bacteroidaceae;g__Bacteroides;s__Bacteroides sp. 1_1_14	1.30192	2.47796e-07	0.000287295	BMI, Age, gender, usual stool type
Diseases	Gout (M10)	k__Bacteria;p__Bacteroidetes;c__Bacteroidia;o__Bacteroidales;f__Bacteroidaceae;g__Bacteroides;s__Bacteroides vulgatus	1.17678	2.66252e-07	0.000308171	BMI, Age, gender, usual stool type
Diseases	Gout (M10)	k__Bacteria;p__Bacteroidetes;c__Bacteroidia;o__Bacteroidales;f__Odoribacteraceae;g__Odoribacter;s__Odoribacter splanchnicus CAG:14	0.834821	2.7189e-07	0.000314594	BMI, Age, gender, usual stool type
Diseases	Gout (M10)	k__Bacteria;p__Bacteroidetes;c__Bacteroidia;o__Bacteroidales;f__Bacteroidaceae;g__Bacteroides;s__Bacteroides sp. AM56-10ce	1.49808	2.77157e-07	0.000320423	BMI, Age, gender, usual stool type
Diseases	Gout (M10)	k__Bacteria;p__Bacteroidetes;c__Bacteroidia;o__Bacteroidales;f__Porphyromonadaceae;g__Unclassified;s__Porphyromonadaceae bacterium KA00676	1.00121	2.84313e-07	0.000328522	BMI, Age, gender, usual stool type
Diseases	Gout (M10)	k__Bacteria;p__Firmicutes;c__Clostridia;o__Clostridiales;f__Ruminococcaceae;g__Unclassified;s__Ruminococcaceae bacterium Marseille-P2935	-0.815885	2.91124e-07	0.000332926	BMI, Age, gender, usual stool type
Diseases	Gout (M10)	k__Bacteria;p__Bacteroidetes;c__Bacteroidia;o__Bacteroidales;f__Bacteroidaceae;g__Bacteroides;s__Bacteroides sp. 2_1_22	1.17964	3.24598e-07	0.000374108	BMI, Age, gender, usual stool type
Diseases	Gout (M10)	k__Bacteria;p__Bacteroidetes;c__Bacteroidia;o__Bacteroidales;f__Bacteroidaceae;g__Bacteroides;s__Bacteroides stercoris CAG:120	0.967772	3.34079e-07	0.000384937	BMI, Age, gender, usual stool type
Diseases	Gout (M10)	k__Bacteria;p__Proteobacteria;c__Betaproteobacteria;o__Rhodocyclales;f__Zoogloeaceae;g__Thauera;s__Thauera phenylacetica	0.903488	3.37447e-07	0.00038867	BMI, Age, gender, usual stool type
Diseases	Gout (M10)	k__Bacteria;p__Proteobacteria;c__Gammaproteobacteria;o__Xanthomonadales;f__Xanthomonadaceae;g__Xanthomonas;s__Xanthomonas citri	0.476883	3.48345e-07	0.000401048	BMI, Age, gender, usual stool type
Diseases	Gout (M10)	k__Bacteria;p__Bacteroidetes;c__Bacteroidia;o__Bacteroidales;f__Bacteroidaceae;g__Bacteroides;s__Bacteroides sp. D1	1.18062	3.62306e-07	0.000416675	BMI, Age, gender, usual stool type
Diseases	Gout (M10)	k__Bacteria;p__Bacteroidetes;c__Bacteroidia;o__Bacteroidales;f__Unclassified;g__Unclassified;s__Bacteroidales bacterium Barb6	0.844706	3.74966e-07	0.000431093	BMI, Age, gender, usual stool type
Diseases	Gout (M10)	k__Bacteria;p__Bacteroidetes;c__Bacteroidia;o__Bacteroidales;f__Rikenellaceae;g__Alistipes;s__Alistipes sp. CAG:29	1.05266	4.08332e-07	0.000468698	BMI, Age, gender, usual stool type
Diseases	Gout (M10)	k__Bacteria;p__Actinobacteria;c__Coriobacteriia;o__Eggerthellales;f__Eggerthellaceae;g__Eggerthella;s__Eggerthella sp. CAG:1427	0.473223	4.13595e-07	0.000474731	BMI, Age, gender, usual stool type
Diseases	Gout (M10)	k__Bacteria;p__Proteobacteria;c__Alphaproteobacteria;o__Rhizobiales;f__Rhizobiaceae;g__Rhizobium;s__Rhizobium etli	0.436663	4.19848e-07	0.00048185	BMI, Age, gender, usual stool type
Diseases	Gout (M10)	k__Bacteria;p__Tenericutes;c__Mollicutes;o__Anaeroplasmatales;f__Anaeroplasmataceae;g__Anaeroplasma;s__Anaeroplasma bactoclasticum	-2.10704	4.50319e-07	0.000498441	BMI, Age, gender, usual stool type
Diseases	Gout (M10)	k__Bacteria;p__Proteobacteria;c__Betaproteobacteria;o__Burkholderiales;f__Burkholderiaceae;g__Cupriavidus;s__Cupriavidus taiwanensis	0.483443	6.74056e-07	0.000768035	BMI, Age, gender, usual stool type
Diseases	Gout (M10)	k__Bacteria;p__Bacteroidetes;c__Bacteroidia;o__Bacteroidales;f__Bacteroidaceae;g__Bacteroides;s__Bacteroides uniformis CAG:3	1.03848	6.90813e-07	0.000787383	BMI, Age, gender, usual stool type
Diseases	Gout (M10)	k__Bacteria;p__Bacteroidetes;c__Bacteroidia;o__Bacteroidales;f__Rikenellaceae;g__Alistipes;s__Alistipes sp. CHKCI003	0.81617	7.22412e-07	0.000822434	BMI, Age, gender, usual stool type
Diseases	Gout (M10)	k__Bacteria;p__Cyanobacteria;c__Unclassified;o__Nostocales;f__Tolypothrichaceae;g__Tolypothrix;s__Tolypothrix campylonemoides	0.50184	7.8866e-07	0.000896349	BMI, Age, gender, usual stool type
Diseases	Gout (M10)	k__Bacteria;p__Bacteroidetes;c__Bacteroidia;o__Bacteroidales;f__Bacteroidaceae;g__Bacteroides;s__Bacteroides sp. CAG:754	0.812356	7.91038e-07	0.000898852	BMI, Age, gender, usual stool type
Diseases	Gout (M10)	k__Bacteria;p__Firmicutes;c__Clostridia;o__Clostridiales;f__Catabacteriaceae;g__Catabacter;s__Catabacter hongkongensis	-1.03713	8.33718e-07	0.000900781	BMI, Age, gender, usual stool type
Diseases	Gout (M10)	k__Bacteria;p__Bacteroidetes;c__Bacteroidia;o__Bacteroidales;f__Bacteroidaceae;g__Bacteroides;s__Bacteroides vulgatus CAG:6	1.1246	8.25586e-07	0.000936986	BMI, Age, gender, usual stool type
Diseases	Gout (M10)	k__Bacteria;p__Proteobacteria;c__Betaproteobacteria;o__Burkholderiales;f__Burkholderiaceae;g__Burkholderia;s__Burkholderia mallei	0.672063	8.36432e-07	0.000946715	BMI, Age, gender, usual stool type
Diseases	Gout (M10)	k__Bacteria;p__Bacteroidetes;c__Bacteroidia;o__Bacteroidales;f__Bacteroidaceae;g__Bacteroides;s__Bacteroides sp. CF01-10NS	1.47503	8.3832e-07	0.000949562	BMI, Age, gender, usual stool type
Diseases	Gout (M10)	k__Bacteria;p__Bacteroidetes;c__Bacteroidia;o__Bacteroidales;f__Bacteroidaceae;g__Bacteroides;s__Bacteroides finegoldii CAG:203	0.90021	9.6542e-07	0.00109251	BMI, Age, gender, usual stool type
Diseases	Gout (M10)	k__Bacteria;p__Firmicutes;c__Clostridia;o__Clostridiales;f__Lachnospiraceae;g__Dorea;s__Dorea sp. 42_8	0.855786	1.04646e-06	0.00117959	BMI, Age, gender, usual stool type
Diseases	Gout (M10)	k__Bacteria;p__Proteobacteria;c__Betaproteobacteria;o__Burkholderiales;f__Comamonadaceae;g__Hydrogenophaga;s__Hydrogenophaga sp. T4	0.548455	1.09337e-06	0.00123134	BMI, Age, gender, usual stool type
Diseases	Gout (M10)	k__Bacteria;p__Proteobacteria;c__Gammaproteobacteria;o__Enterobacterales;f__Enterobacteriaceae;g__Salmonella;s__Salmonella enterica	0.641223	1.10477e-06	0.00124629	BMI, Age, gender, usual stool type
Diseases	Gout (M10)	k__Bacteria;p__Firmicutes;c__Clostridia;o__Clostridiales;f__Ruminococcaceae;g__Papillibacter;s__Papillibacter cinnamivorans	-0.798767	1.17848e-06	0.00130054	BMI, Age, gender, usual stool type
Diseases	Gout (M10)	k__Bacteria;p__Bacteroidetes;c__Bacteroidia;o__Bacteroidales;f__Bacteroidaceae;g__Bacteroides;s__Bacteroides finegoldii	1.16475	1.22897e-06	0.00138319	BMI, Age, gender, usual stool type
Diseases	Gout (M10)	k__Bacteria;p__Bacteroidetes;c__Bacteroidia;o__Bacteroidales;f__Bacteroidaceae;g__Bacteroides;s__Bacteroides sp. AM37-9	1.40249	1.26228e-06	0.00141609	BMI, Age, gender, usual stool type
Diseases	Gout (M10)	k__Bacteria;p__Bacteroidetes;c__Bacteroidia;o__Bacteroidales;f__Bacteroidaceae;g__Bacteroides;s__Bacteroides sp. KFT8	1.25468	1.29409e-06	0.00145245	BMI, Age, gender, usual stool type
Diseases	Gout (M10)	k__Bacteria;p__Firmicutes;c__Clostridia;o__Unclassified;f__Unclassified;g__Unclassified;s__Clostridia bacterium	-0.917589	1.35503e-06	0.00151876	BMI, Age, gender, usual stool type
Diseases	Gout (M10)	k__Bacteria;p__Proteobacteria;c__Betaproteobacteria;o__Burkholderiales;f__Burkholderiaceae;g__Ralstonia;s__Ralstonia solanacearum	0.513007	1.38521e-06	0.00155023	BMI, Age, gender, usual stool type
Diseases	Gout (M10)	k__Bacteria;p__Firmicutes;c__Clostridia;o__Clostridiales;f__Unclassified;g__Unclassified;s__Clostridiales bacterium 43-6	-1.30915	1.43048e-06	0.00155909	BMI, Age, gender, usual stool type
Diseases	Gout (M10)	k__Bacteria;p__Unclassified;c__Unclassified;o__Unclassified;f__Unclassified;g__Unclassified;s__uncultured bacterium MedeBAC46A06	1.14619	1.39457e-06	0.0015595	BMI, Age, gender, usual stool type
Diseases	Gout (M10)	k__Bacteria;p__Proteobacteria;c__Gammaproteobacteria;o__Xanthomonadales;f__Xanthomonadaceae;g__Xanthomonas;s__Xanthomonas phaseoli	0.568234	1.42327e-06	0.00159135	BMI, Age, gender, usual stool type
Diseases	Gout (M10)	k__Bacteria;p__Firmicutes;c__Clostridia;o__Clostridiales;f__Lachnospiraceae;g__Blautia;s__[Ruminococcus] torques	0.786998	1.42545e-06	0.00159699	BMI, Age, gender, usual stool type
Diseases	Gout (M10)	k__Bacteria;p__Firmicutes;c__Unclassified;o__Unclassified;f__Unclassified;g__Unclassified;s__Firmicutes bacterium CAG:449	-1.75811	1.49547e-06	0.00165162	BMI, Age, gender, usual stool type
Diseases	Gout (M10)	k__Bacteria;p__Bacteroidetes;c__Bacteroidia;o__Bacteroidales;f__Bacteroidaceae;g__Bacteroides;s__Bacteroides coprophilus CAG:333	1.10723	1.4818e-06	0.00165696	BMI, Age, gender, usual stool type
Diseases	Gout (M10)	k__Bacteria;p__Proteobacteria;c__Betaproteobacteria;o__Neisseriales;f__Neisseriaceae;g__Neisseria;s__Neisseria meningitidis	0.490066	1.51704e-06	0.00169521	BMI, Age, gender, usual stool type
Diseases	Gout (M10)	k__Bacteria;p__Bacteroidetes;c__Bacteroidia;o__Bacteroidales;f__Bacteroidaceae;g__Bacteroides;s__Bacteroides fluxus	0.900521	1.56316e-06	0.00174538	BMI, Age, gender, usual stool type
Diseases	Gout (M10)	k__Bacteria;p__Bacteroidetes;c__Bacteroidia;o__Bacteroidales;f__Rikenellaceae;g__Alistipes;s__Alistipes sp. CAG:53	0.772807	1.60631e-06	0.00179185	BMI, Age, gender, usual stool type
Diseases	Gout (M10)	k__Bacteria;p__Bacteroidetes;c__Bacteroidia;o__Bacteroidales;f__Bacteroidaceae;g__Bacteroides;s__Bacteroides sp. CAG:189	0.932655	1.61821e-06	0.00180463	BMI, Age, gender, usual stool type
Diseases	Gout (M10)	k__Bacteria;p__Bacteroidetes;c__Bacteroidia;o__Bacteroidales;f__Bacteroidaceae;g__Bacteroides;s__Bacteroides sp. CAG:598	0.882614	1.64534e-06	0.001834	BMI, Age, gender, usual stool type
Diseases	Gout (M10)	k__Bacteria;p__Proteobacteria;c__Betaproteobacteria;o__Burkholderiales;f__Comamonadaceae;g__Variovorax;s__Variovorax sp. WDL1	0.755879	1.70803e-06	0.00189926	BMI, Age, gender, usual stool type
Diseases	Gout (M10)	k__Bacteria;p__Bacteroidetes;c__Bacteroidia;o__Bacteroidales;f__Bacteroidaceae;g__Bacteroides;s__Bacteroides oleiciplenus	1.07446	1.70795e-06	0.00190081	BMI, Age, gender, usual stool type
Diseases	Gout (M10)	k__Bacteria;p__Firmicutes;c__Clostridia;o__Clostridiales;f__Eubacteriaceae;g__Eubacterium;s__Eubacterium sp. CAG:841	-1.5014	1.74985e-06	0.00193569	BMI, Age, gender, usual stool type
Diseases	Gout (M10)	k__Bacteria;p__Firmicutes;c__Erysipelotrichia;o__Erysipelotrichales;f__Erysipelotrichaceae;g__Coprobacillus;s__Coprobacillus sp. CAG:698	-2.32467	1.85878e-06	0.00201095	BMI, Age, gender, usual stool type
Diseases	Gout (M10)	k__Bacteria;p__Bacteroidetes;c__Bacteroidia;o__Bacteroidales;f__Bacteroidaceae;g__Bacteroides;s__Bacteroides sp. AF17-1	1.48256	1.84461e-06	0.00201344	BMI, Age, gender, usual stool type
Diseases	Gout (M10)	k__Bacteria;p__Bacteroidetes;c__Bacteroidia;o__Bacteroidales;f__Bacteroidaceae;g__Bacteroides;s__Bacteroides ovatus CAG:22	0.926617	1.82344e-06	0.00202616	BMI, Age, gender, usual stool type
Diseases	Gout (M10)	k__Bacteria;p__Bacteroidetes;c__Bacteroidia;o__Bacteroidales;f__Odoribacteraceae;g__Odoribacter;s__Odoribacter sp. 43_10	0.952297	1.84411e-06	0.0020441	BMI, Age, gender, usual stool type
Diseases	Gout (M10)	k__Bacteria;p__Bacteroidetes;c__Bacteroidia;o__Bacteroidales;f__Porphyromonadaceae;g__Porphyromonas;s__Porphyromonas gingivalis	0.715156	1.96749e-06	0.00218101	BMI, Age, gender, usual stool type
Diseases	Gout (M10)	k__Bacteria;p__Bacteroidetes;c__Bacteroidia;o__Bacteroidales;f__Bacteroidaceae;g__Bacteroides;s__Bacteroides uniformis	1.06592	2.13345e-06	0.00236059	BMI, Age, gender, usual stool type
Diseases	Gout (M10)	k__Bacteria;p__Bacteroidetes;c__Bacteroidia;o__Bacteroidales;f__Bacteroidaceae;g__Bacteroides;s__Bacteroides stercoris	1.40103	2.23381e-06	0.00246761	BMI, Age, gender, usual stool type
Diseases	Gout (M10)	k__Bacteria;p__Bacteroidetes;c__Bacteroidia;o__Bacteroidales;f__Bacteroidaceae;g__Bacteroides;s__Bacteroides sp. 3_1_33FAA	0.993971	2.24714e-06	0.00248297	BMI, Age, gender, usual stool type
Diseases	Gout (M10)	k__Bacteria;p__Firmicutes;c__Unclassified;o__Unclassified;f__Unclassified;g__Unclassified;s__Firmicutes bacterium CAG:345	-2.35694	2.62895e-06	0.00285958	BMI, Age, gender, usual stool type
Diseases	Gout (M10)	k__Bacteria;p__Bacteroidetes;c__Cytophagia;o__Cytophagales;f__Flammeovirgaceae;g__Cesiribacter;s__Cesiribacter andamanensis	0.74084	2.66842e-06	0.00293379	BMI, Age, gender, usual stool type
Diseases	Gout (M10)	k__Bacteria;p__Proteobacteria;c__Gammaproteobacteria;o__Enterobacterales;f__Enterobacteriaceae;g__Shigella;s__Shigella flexneri	0.93144	3.1132e-06	0.00341071	BMI, Age, gender, usual stool type
Diseases	Gout (M10)	k__Bacteria;p__Bacteroidetes;c__Bacteroidia;o__Bacteroidales;f__Bacteroidaceae;g__Bacteroides;s__Bacteroides sp. 43_46	1.46493	3.12155e-06	0.00341623	BMI, Age, gender, usual stool type
Diseases	Gout (M10)	k__Bacteria;p__Bacteroidetes;c__Bacteroidia;o__Bacteroidales;f__Tannerellaceae;g__Tannerella;s__Tannerella sp. 6_1_58FAA_CT1	0.84934	3.13096e-06	0.00343068	BMI, Age, gender, usual stool type
Diseases	Gout (M10)	k__Bacteria;p__Bacteroidetes;c__Bacteroidia;o__Bacteroidales;f__Tannerellaceae;g__Tannerella;s__Tannerella sp. CAG:118	0.865478	3.1393e-06	0.00343855	BMI, Age, gender, usual stool type
Diseases	Gout (M10)	k__Bacteria;p__Actinobacteria;c__Actinobacteria;o__Corynebacteriales;f__Mycobacteriaceae;g__Mycobacteroides;s__Mycobacteroides abscessus	0.412152	3.31351e-06	0.0036247	BMI, Age, gender, usual stool type
Diseases	Gout (M10)	k__Bacteria;p__Bacteroidetes;c__Bacteroidia;o__Bacteroidales;f__Porphyromonadaceae;g__Porphyromonas;s__Porphyromonas crevioricanis	0.901511	3.33068e-06	0.0036411	BMI, Age, gender, usual stool type
Diseases	Gout (M10)	k__Bacteria;p__Proteobacteria;c__Gammaproteobacteria;o__Enterobacterales;f__Yersiniaceae;g__Serratia;s__Serratia marcescens	0.463882	3.38026e-06	0.00369327	BMI, Age, gender, usual stool type
Diseases	Gout (M10)	k__Bacteria;p__Proteobacteria;c__Betaproteobacteria;o__Burkholderiales;f__Sutterellaceae;g__Sutterella;s__Sutterella wadsworthensis CAG:135	0.934368	3.8181e-06	0.00415899	BMI, Age, gender, usual stool type
Diseases	Gout (M10)	k__Bacteria;p__Proteobacteria;c__Alphaproteobacteria;o__Rhizobiales;f__Rhizobiaceae;g__Agrobacterium;s__Agrobacterium tumefaciens	0.613706	3.88039e-06	0.00420774	BMI, Age, gender, usual stool type
Diseases	Gout (M10)	k__Bacteria;p__Proteobacteria;c__Gammaproteobacteria;o__Enterobacterales;f__Enterobacteriaceae;g__Enterobacter;s__Enterobacter ludwigii	0.662877	3.88867e-06	0.00423279	BMI, Age, gender, usual stool type
Diseases	Gout (M10)	k__Bacteria;p__Proteobacteria;c__Gammaproteobacteria;o__Vibrionales;f__Vibrionaceae;g__Vibrio;s__Vibrio cholerae	0.579042	3.89193e-06	0.00423521	BMI, Age, gender, usual stool type
Diseases	Gout (M10)	k__Viruses;p__Unclassified;c__Unclassified;o__Unclassified;f__Unclassified;g__Unclassified;s__unidentified phage	-0.713899	3.9692e-06	0.00430258	BMI, Age, gender, usual stool type
Diseases	Gout (M10)	k__Bacteria;p__Bacteroidetes;c__Bacteroidia;o__Bacteroidales;f__Bacteroidaceae;g__Bacteroides;s__Bacteroides sp. CAG:661	0.694329	4.24146e-06	0.00460753	BMI, Age, gender, usual stool type
Diseases	Gout (M10)	k__Bacteria;p__Firmicutes;c__Clostridia;o__Clostridiales;f__Ruminococcaceae;g__Ruminococcus;s__Ruminococcus sp. CAG:60	0.513007	4.31455e-06	0.00468122	BMI, Age, gender, usual stool type
Diseases	Gout (M10)	k__Bacteria;p__Bacteroidetes;c__Bacteroidia;o__Bacteroidales;f__Rikenellaceae;g__Alistipes;s__Alistipes sp. CAG:268	0.807927	4.57831e-06	0.00496113	BMI, Age, gender, usual stool type
Diseases	Gout (M10)	k__Bacteria;p__Firmicutes;c__Clostridia;o__Clostridiales;f__Ruminococcaceae;g__Neglecta;s__Neglecta timonensis	-0.645398	4.71152e-06	0.00506277	BMI, Age, gender, usual stool type
Diseases	Gout (M10)	k__Bacteria;p__Firmicutes;c__Bacilli;o__Lactobacillales;f__Streptococcaceae;g__Streptococcus;s__Streptococcus parasanguinis	0.943309	4.7252e-06	0.00511294	BMI, Age, gender, usual stool type
Diseases	Gout (M10)	k__Bacteria;p__Bacteroidetes;c__Bacteroidia;o__Bacteroidales;f__Unclassified;g__Unclassified;s__Bacteroidales bacterium Barb4	0.72599	4.83704e-06	0.00523303	BMI, Age, gender, usual stool type
Diseases	Gout (M10)	k__Bacteria;p__Bacteroidetes;c__Bacteroidia;o__Bacteroidales;f__Bacteroidaceae;g__Bacteroides;s__Bacteroides sp. HPS0048	1.07303	5.04408e-06	0.0054493	BMI, Age, gender, usual stool type
Diseases	Gout (M10)	k__Bacteria;p__Proteobacteria;c__Betaproteobacteria;o__Burkholderiales;f__Alcaligenaceae;g__Bordetella;s__Bordetella hinzii	0.569677	5.20879e-06	0.00548617	BMI, Age, gender, usual stool type
Diseases	Gout (M10)	k__Bacteria;p__Bacteroidetes;c__Bacteroidia;o__Bacteroidales;f__Bacteroidaceae;g__Bacteroides;s__Bacteroides sp. AR29	1.33828	5.455e-06	0.00588354	BMI, Age, gender, usual stool type
Diseases	Gout (M10)	k__Bacteria;p__Firmicutes;c__Unclassified;o__Unclassified;f__Unclassified;g__Unclassified;s__Firmicutes bacterium CAG:24053_14	-0.647211	5.59599e-06	0.00602997	BMI, Age, gender, usual stool type
Diseases	Gout (M10)	k__Bacteria;p__Bacteroidetes;c__Bacteroidia;o__Bacteroidales;f__Bacteroidaceae;g__Bacteroides;s__Bacteroides sp. HMSC067B03	1.26858	6.04306e-06	0.00649925	BMI, Age, gender, usual stool type
Diseases	Gout (M10)	k__Bacteria;p__Bacteroidetes;c__Bacteroidia;o__Bacteroidales;f__Bacteroidaceae;g__Bacteroides;s__Bacteroides caccae	1.24999	6.25924e-06	0.00673084	BMI, Age, gender, usual stool type
Diseases	Gout (M10)	k__Bacteria;p__Proteobacteria;c__Alphaproteobacteria;o__Rhizobiales;f__Rhizobiaceae;g__Agrobacterium;s__Agrobacterium genomosp. 5	0.697859	6.30502e-06	0.00676451	BMI, Age, gender, usual stool type
Diseases	Gout (M10)	k__Bacteria;p__Bacteroidetes;c__Bacteroidia;o__Bacteroidales;f__Bacteroidaceae;g__Bacteroides;s__Bacteroides cellulosilyticus CAG:158	0.839478	7.11732e-06	0.00762861	BMI, Age, gender, usual stool type
Diseases	Gout (M10)	k__Bacteria;p__Bacteroidetes;c__Bacteroidia;o__Bacteroidales;f__Bacteroidaceae;g__Bacteroides;s__Bacteroides sp. CAG:702	0.800736	7.60579e-06	0.00814023	BMI, Age, gender, usual stool type
Diseases	Gout (M10)	k__Bacteria;p__Bacteroidetes;c__Bacteroidia;o__Bacteroidales;f__Dysgonamonadaceae;g__Dysgonomonas;s__uncultured Dysgonomonas sp.	0.858222	8.33695e-06	0.00889695	BMI, Age, gender, usual stool type
Diseases	Gout (M10)	k__Bacteria;p__Bacteroidetes;c__Bacteroidia;o__Bacteroidales;f__Bacteroidaceae;g__Bacteroides;s__Bacteroides sp. AM54-2NS	1.18755	8.49845e-06	0.00906092	BMI, Age, gender, usual stool type
Diseases	Gout (M10)	k__Bacteria;p__Firmicutes;c__Clostridia;o__Clostridiales;f__Clostridiaceae;g__Clostridium;s__Clostridium sp. CAG:389	-1.59656	9.31688e-06	0.00976211	BMI, Age, gender, usual stool type
Diseases	Gout (M10)	k__Bacteria;p__Firmicutes;c__Clostridia;o__Clostridiales;f__Clostridiaceae;g__Clostridium;s__Clostridium sp. 28_12	-2.42932	9.65325e-06	0.00984655	BMI, Age, gender, usual stool type
Diseases	Gout (M10)	k__Bacteria;p__Bacteroidetes;c__Bacteroidia;o__Bacteroidales;f__Tannerellaceae;g__Tannerella;s__Tannerella sp. CAG:51	0.894954	9.86746e-06	0.0104934	BMI, Age, gender, usual stool type
Diseases	Gout (M10)	k__Bacteria;p__Actinobacteria;c__Actinobacteria;o__Bifidobacteriales;f__Bifidobacteriaceae;g__Bifidobacterium;s__Bifidobacterium animalis	0.459167	9.88442e-06	0.0104978	BMI, Age, gender, usual stool type
Diseases	Gout (M10)	k__Bacteria;p__Firmicutes;c__Clostridia;o__Clostridiales;f__Ruminococcaceae;g__Unclassified;s__Ruminococcaceae bacterium FB2012	-1.18544	1.03224e-05	0.0106457	BMI, Age, gender, usual stool type
Diseases	Gout (M10)	k__Bacteria;p__Firmicutes;c__Erysipelotrichia;o__Erysipelotrichales;f__Erysipelotrichaceae;g__Coprobacillus;s__Coprobacillus sp. CAG:826	-2.15442	1.02888e-05	0.0106929	BMI, Age, gender, usual stool type
Diseases	Gout (M10)	k__Bacteria;p__Proteobacteria;c__Betaproteobacteria;o__Burkholderiales;f__Burkholderiaceae;g__Cupriavidus;s__Cupriavidus oxalaticus	0.531532	1.02328e-05	0.0108627	BMI, Age, gender, usual stool type
Diseases	Gout (M10)	k__Bacteria;p__Proteobacteria;c__Deltaproteobacteria;o__Desulfovibrionales;f__Desulfovibrionaceae;g__Bilophila;s__Bilophila sp. 4_1_30	1.44129	1.06354e-05	0.0112755	BMI, Age, gender, usual stool type
Diseases	Gout (M10)	k__Bacteria;p__Proteobacteria;c__Gammaproteobacteria;o__Enterobacterales;f__Enterobacteriaceae;g__Cronobacter;s__Cronobacter universalis	0.682792	1.06525e-05	0.0112868	BMI, Age, gender, usual stool type
Diseases	Gout (M10)	k__Bacteria;p__Bacteroidetes;c__Bacteroidia;o__Bacteroidales;f__Tannerellaceae;g__Parabacteroides;s__Parabacteroides merdae	1.13219	1.23209e-05	0.0130281	BMI, Age, gender, usual stool type
Diseases	Gout (M10)	k__Bacteria;p__Bacteroidetes;c__Bacteroidia;o__Bacteroidales;f__Bacteroidaceae;g__Bacteroides;s__Bacteroides sp. AF32-8BH	1.1825	1.23928e-05	0.0130711	BMI, Age, gender, usual stool type
Diseases	Gout (M10)	k__Bacteria;p__Bacteroidetes;c__Bacteroidia;o__Bacteroidales;f__Bacteroidaceae;g__Bacteroides;s__Bacteroides sp. OF03-11BH	1.16399	1.26628e-05	0.0133493	BMI, Age, gender, usual stool type
Diseases	Gout (M10)	k__Bacteria;p__Firmicutes;c__Clostridia;o__Clostridiales;f__Clostridiaceae;g__Clostridium;s__Clostridium sp. 26_22	-1.6533	1.32793e-05	0.0137277	BMI, Age, gender, usual stool type
Diseases	Gout (M10)	k__Bacteria;p__Bacteroidetes;c__Bacteroidia;o__Bacteroidales;f__Bacteroidaceae;g__Bacteroides;s__Bacteroides acidifaciens	1.1991	1.34038e-05	0.0141162	BMI, Age, gender, usual stool type
Diseases	Gout (M10)	k__Bacteria;p__Firmicutes;c__Clostridia;o__Clostridiales;f__Lachnospiraceae;g__Dorea;s__Dorea longicatena	0.561435	1.34304e-05	0.0141555	BMI, Age, gender, usual stool type
Diseases	Gout (M10)	k__Bacteria;p__Firmicutes;c__Clostridia;o__Clostridiales;f__Ruminococcaceae;g__Anaerotruncus;s__Anaerotruncus sp. CAG:390	-0.775634	1.35866e-05	0.0143104	BMI, Age, gender, usual stool type
Diseases	Gout (M10)	k__Bacteria;p__Bacteroidetes;c__Bacteroidia;o__Bacteroidales;f__Unclassified;g__Unclassified;s__Bacteroidales bacterium WCE2008	-3.11571	1.47714e-05	0.0151816	BMI, Age, gender, usual stool type
Diseases	Gout (M10)	k__Bacteria;p__Firmicutes;c__Unclassified;o__Unclassified;f__Unclassified;g__Unclassified;s__Firmicutes bacterium CAG:176	-1.03272	1.47239e-05	0.0154735	BMI, Age, gender, usual stool type
Diseases	Gout (M10)	k__Bacteria;p__Actinobacteria;c__Actinobacteria;o__Micrococcales;f__Microbacteriaceae;g__Curtobacterium;s__Curtobacterium sp. ER1_6	0.398413	1.49495e-05	0.0156914	BMI, Age, gender, usual stool type
Diseases	Gout (M10)	k__Bacteria;p__Firmicutes;c__Clostridia;o__Clostridiales;f__Peptococcaceae;g__Dehalobacter;s__Dehalobacter sp. FTH1	-1.25427	1.65582e-05	0.0162584	BMI, Age, gender, usual stool type
Diseases	Gout (M10)	k__Bacteria;p__Bacteroidetes;c__Bacteroidia;o__Bacteroidales;f__Tannerellaceae;g__Parabacteroides;s__Parabacteroides sp. D26	0.993067	1.58071e-05	0.016561	BMI, Age, gender, usual stool type
Diseases	Gout (M10)	k__Bacteria;p__Bacteroidetes;c__Bacteroidia;o__Bacteroidales;f__Bacteroidaceae;g__Bacteroides;s__Bacteroides sp. 4_1_36	1.11571	1.58723e-05	0.0166405	BMI, Age, gender, usual stool type
Diseases	Gout (M10)	k__Bacteria;p__Actinobacteria;c__Actinobacteria;o__Corynebacteriales;f__Mycobacteriaceae;g__Mycobacterium;s__Mycobacterium tuberculosis	0.368765	1.72595e-05	0.0180413	BMI, Age, gender, usual stool type
Diseases	Gout (M10)	k__Bacteria;p__Bacteroidetes;c__Bacteroidia;o__Bacteroidales;f__Rikenellaceae;g__Alistipes;s__Alistipes sp. CAG:157	0.702228	1.84053e-05	0.0192113	BMI, Age, gender, usual stool type
Diseases	Gout (M10)	k__Bacteria;p__Firmicutes;c__Clostridia;o__Clostridiales;f__Clostridiaceae;g__Clostridium;s__Clostridium sp. CAG:505	0.39855	1.86719e-05	0.0194372	BMI, Age, gender, usual stool type
Diseases	Gout (M10)	k__Bacteria;p__Firmicutes;c__Unclassified;o__Unclassified;f__Unclassified;g__Unclassified;s__Firmicutes bacterium HGW-Firmicutes-16	-0.709348	2.05051e-05	0.0211286	BMI, Age, gender, usual stool type
Diseases	Gout (M10)	k__Bacteria;p__Proteobacteria;c__Betaproteobacteria;o__Unclassified;f__Unclassified;g__Candidatus Accumulibacter;s__Candidatus Accumulibacter sp. SK-11	0.422311	2.0787e-05	0.0215903	BMI, Age, gender, usual stool type
Diseases	Gout (M10)	k__Bacteria;p__Firmicutes;c__Clostridia;o__Clostridiales;f__Clostridiaceae;g__Clostridium;s__Clostridium sp. CAG:356	-1.56347	2.15492e-05	0.0220197	BMI, Age, gender, usual stool type
Diseases	Gout (M10)	k__Bacteria;p__Bacteroidetes;c__Bacteroidia;o__Bacteroidales;f__Tannerellaceae;g__Parabacteroides;s__Parabacteroides sp. AM17-47	0.731893	2.25168e-05	0.0233293	BMI, Age, gender, usual stool type
Diseases	Gout (M10)	k__Bacteria;p__Bacteroidetes;c__Bacteroidia;o__Bacteroidales;f__Prevotellaceae;g__Prevotella;s__Prevotella sp. F0091	0.683877	2.28263e-05	0.0236661	BMI, Age, gender, usual stool type
Diseases	Gout (M10)	k__Bacteria;p__Bacteroidetes;c__Bacteroidia;o__Bacteroidales;f__Bacteroidaceae;g__Bacteroides;s__Bacteroides sp. AF34-31BH	1.25201	2.28887e-05	0.0237095	BMI, Age, gender, usual stool type
Diseases	Gout (M10)	k__Bacteria;p__Bacteroidetes;c__Bacteroidia;o__Bacteroidales;f__Bacteroidaceae;g__Bacteroides;s__Bacteroides sp. AF25-17LB	1.26821	2.41063e-05	0.0247755	BMI, Age, gender, usual stool type
Diseases	Gout (M10)	k__Bacteria;p__Bacteroidetes;c__Bacteroidia;o__Bacteroidales;f__Rikenellaceae;g__Alistipes;s__Alistipes putredinis CAG:67	0.990096	2.52912e-05	0.0261574	BMI, Age, gender, usual stool type
Diseases	Gout (M10)	k__Bacteria;p__Firmicutes;c__Unclassified;o__Unclassified;f__Unclassified;g__Unclassified;s__Firmicutes bacterium CAG:110	-0.694665	2.55961e-05	0.0264452	BMI, Age, gender, usual stool type
Diseases	Gout (M10)	k__Bacteria;p__Proteobacteria;c__Betaproteobacteria;o__Burkholderiales;f__Sutterellaceae;g__Sutterella;s__Sutterella sp. CAG:351	0.527375	2.57578e-05	0.0266019	BMI, Age, gender, usual stool type
Diseases	Gout (M10)	k__Bacteria;p__Bacteroidetes;c__Bacteroidia;o__Bacteroidales;f__Bacteroidaceae;g__Bacteroides;s__Bacteroides caecimuris	0.893684	2.71872e-05	0.0280272	BMI, Age, gender, usual stool type
Diseases	Gout (M10)	k__Bacteria;p__Firmicutes;c__Clostridia;o__Clostridiales;f__Clostridiales Family XIII. Incertae Sedis;g__Unclassified;s__Clostridiales Family XIII bacterium	-1.56649	2.86973e-05	0.0288569	BMI, Age, gender, usual stool type
Diseases	Gout (M10)	k__Bacteria;p__Bacteroidetes;c__Bacteroidia;o__Bacteroidales;f__Rikenellaceae;g__Rikenella;s__Rikenella microfusus	0.836774	3.01089e-05	0.0308948	BMI, Age, gender, usual stool type
Diseases	Gout (M10)	k__Bacteria;p__Proteobacteria;c__Gammaproteobacteria;o__Enterobacterales;f__Enterobacteriaceae;g__Citrobacter;s__Citrobacter koseri	0.687851	3.17949e-05	0.032556	BMI, Age, gender, usual stool type
Diseases	Gout (M10)	k__Bacteria;p__Firmicutes;c__Clostridia;o__Clostridiales;f__Oscillospiraceae;g__Oscillibacter;s__Oscillibacter sp. CAG:241_62_21	-0.908729	3.31758e-05	0.0338825	BMI, Age, gender, usual stool type
Diseases	Gout (M10)	k__Bacteria;p__Firmicutes;c__Clostridia;o__Clostridiales;f__Lachnospiraceae;g__Lachnoclostridium;s__[Clostridium] clostridioforme	0.502782	3.31193e-05	0.0339014	BMI, Age, gender, usual stool type
Diseases	Gout (M10)	k__Bacteria;p__Bacteroidetes;c__Bacteroidia;o__Bacteroidales;f__Prevotellaceae;g__Prevotella;s__Prevotella sp. CAG:755	0.656788	3.37817e-05	0.0345745	BMI, Age, gender, usual stool type
Diseases	Gout (M10)	k__Bacteria;p__Firmicutes;c__Clostridia;o__Clostridiales;f__Clostridiaceae;g__Clostridium;s__Clostridium sp. CAG:269	-2.11873	3.48199e-05	0.0349923	BMI, Age, gender, usual stool type
Diseases	Gout (M10)	k__Bacteria;p__Firmicutes;c__Clostridia;o__Clostridiales;f__Clostridiaceae;g__Clostridium;s__Clostridium sp. CAG:575	-1.46511	3.57342e-05	0.0351673	BMI, Age, gender, usual stool type
Diseases	Gout (M10)	k__Bacteria;p__Firmicutes;c__Clostridia;o__Clostridiales;f__Clostridiaceae;g__Clostridium;s__Clostridium sp. 26_21	-1.70674	3.60323e-05	0.0356189	BMI, Age, gender, usual stool type
Diseases	Gout (M10)	k__Bacteria;p__Bacteroidetes;c__Bacteroidia;o__Bacteroidales;f__Bacteroidaceae;g__Bacteroides;s__Bacteroides sp. D20	1.10601	3.52832e-05	0.0360525	BMI, Age, gender, usual stool type
Diseases	Gout (M10)	k__Eukaryota;p__Nematoda;c__Chromadorea;o__Rhabditida;f__Rhabditidae;g__Diploscapter;s__Diploscapter pachys	0.415173	3.78062e-05	0.0384967	BMI, Age, gender, usual stool type
Diseases	Gout (M10)	k__Bacteria;p__Proteobacteria;c__Gammaproteobacteria;o__Enterobacterales;f__Enterobacteriaceae;g__Shigella;s__Shigella sonnei	0.706566	3.89395e-05	0.0396312	BMI, Age, gender, usual stool type
Diseases	Gout (M10)	k__Bacteria;p__Firmicutes;c__Clostridia;o__Clostridiales;f__Hungateiclostridiaceae;g__Pseudoclostridium;s__Pseudoclostridium thermosuccinogenes	-0.910106	4.02636e-05	0.0398337	BMI, Age, gender, usual stool type
Diseases	Gout (M10)	k__Bacteria;p__Firmicutes;c__Clostridia;o__Clostridiales;f__Clostridiaceae;g__Clostridium;s__Clostridium sp. CAG:349	-1.93972	3.91966e-05	0.0398393	BMI, Age, gender, usual stool type
Diseases	Gout (M10)	k__Bacteria;p__Bacteroidetes;c__Bacteroidia;o__Bacteroidales;f__Bacteroidaceae;g__Bacteroides;s__Bacteroides sp. OM08-17BH	1.02692	4.06276e-05	0.0412369	BMI, Age, gender, usual stool type
Diseases	Gout (M10)	k__Bacteria;p__Bacteroidetes;c__Bacteroidia;o__Bacteroidales;f__Prevotellaceae;g__Alloprevotella;s__Prevotella sp. oral taxon 473	0.679313	4.23932e-05	0.0429506	BMI, Age, gender, usual stool type
Diseases	Gout (M10)	k__Bacteria;p__Firmicutes;c__Clostridia;o__Clostridiales;f__Unclassified;g__Unclassified;s__Clostridiales bacterium GWF2_38_85	-0.981205	4.46967e-05	0.0432367	BMI, Age, gender, usual stool type
Diseases	Gout (M10)	k__Bacteria;p__Bacteroidetes;c__Bacteroidia;o__Bacteroidales;f__Bacteroidaceae;g__Bacteroides;s__Bacteroides sp. CAG:144	0.842826	4.29717e-05	0.0435729	BMI, Age, gender, usual stool type
Diseases	Gout (M10)	k__Bacteria;p__Firmicutes;c__Unclassified;o__Unclassified;f__Unclassified;g__Unclassified;s__Firmicutes bacterium CAG:124	-0.852655	4.52781e-05	0.0458061	BMI, Age, gender, usual stool type
Diseases	Gout (M10)	k__Bacteria;p__Firmicutes;c__Clostridia;o__Clostridiales;f__Unclassified;g__Unclassified;s__Clostridiales bacterium 59_14	-0.583567	4.66628e-05	0.0470839	BMI, Age, gender, usual stool type
Diseases	Gout (M10)	k__Bacteria;p__Firmicutes;c__Clostridia;o__Clostridiales;f__Hungateiclostridiaceae;g__Petroclostridium;s__Petroclostridium xylanilyticum	-0.924275	4.96449e-05	0.0485535	BMI, Age, gender, usual stool type
Diseases	Gout (M10)	k__Bacteria;p__Bacteroidetes;c__Bacteroidia;o__Bacteroidales;f__Tannerellaceae;g__Parabacteroides;s__Parabacteroides distasonis	1.00974	3.77891e-08	4.64866e-05	BMI, Age, gender, usual stool type, history of antibiotic usage
Diseases	Gout (M10)	k__Bacteria;p__Bacteroidetes;c__Bacteroidia;o__Bacteroidales;f__Tannerellaceae;g__Parabacteroides;s__Parabacteroides sp. D13	1.06266	7.12884e-08	8.75902e-05	BMI, Age, gender, usual stool type, history of antibiotic usage
Diseases	Gout (M10)	k__Bacteria;p__Bacteroidetes;c__Bacteroidia;o__Bacteroidales;f__Bacteroidaceae;g__Bacteroides;s__Bacteroides ovatus	1.13806	1.59611e-07	0.000195713	BMI, Age, gender, usual stool type, history of antibiotic usage
Diseases	Gout (M10)	k__Bacteria;p__Bacteroidetes;c__Bacteroidia;o__Bacteroidales;f__Odoribacteraceae;g__Odoribacter;s__Odoribacter splanchnicus	0.956132	1.75663e-07	0.000215151	BMI, Age, gender, usual stool type, history of antibiotic usage
Diseases	Gout (M10)	k__Bacteria;p__Firmicutes;c__Unclassified;o__Unclassified;f__Unclassified;g__Unclassified;s__Firmicutes bacterium CAG:176_63_11	-1.4281	2.05245e-07	0.000250968	BMI, Age, gender, usual stool type, history of antibiotic usage
Diseases	Gout (M10)	k__Bacteria;p__Bacteroidetes;c__Bacteroidia;o__Bacteroidales;f__Bacteroidaceae;g__Bacteroides;s__Bacteroides sp. 2_1_33B	1.13639	2.25441e-07	0.000275508	BMI, Age, gender, usual stool type, history of antibiotic usage
Diseases	Gout (M10)	k__Bacteria;p__Proteobacteria;c__Gammaproteobacteria;o__Pseudomonadales;f__Pseudomonadaceae;g__Pseudomonas;s__Pseudomonas chlororaphis	1.22004	2.37644e-07	0.000290281	BMI, Age, gender, usual stool type, history of antibiotic usage
Diseases	Gout (M10)	k__Bacteria;p__Proteobacteria;c__Betaproteobacteria;o__Burkholderiales;f__Alcaligenaceae;g__Bordetella;s__Bordetella pertussis	0.552357	2.40392e-07	0.000293639	BMI, Age, gender, usual stool type, history of antibiotic usage
Diseases	Gout (M10)	k__Bacteria;p__Bacteroidetes;c__Bacteroidia;o__Bacteroidales;f__Bacteroidaceae;g__Bacteroides;s__Bacteroides sp. D2	1.39604	2.47092e-07	0.000301706	BMI, Age, gender, usual stool type, history of antibiotic usage
Diseases	Gout (M10)	k__Bacteria;p__Firmicutes;c__Unclassified;o__Unclassified;f__Unclassified;g__Unclassified;s__Firmicutes bacterium CAG:176_59_8	-1.64437	2.51374e-07	0.000305305	BMI, Age, gender, usual stool type, history of antibiotic usage
Diseases	Gout (M10)	k__Bacteria;p__Proteobacteria;c__Gammaproteobacteria;o__Pseudomonadales;f__Moraxellaceae;g__Acinetobacter;s__Acinetobacter baumannii	0.579829	3.32606e-07	0.000405224	BMI, Age, gender, usual stool type, history of antibiotic usage
Diseases	Gout (M10)	k__Bacteria;p__Firmicutes;c__Clostridia;o__Clostridiales;f__Lachnospiraceae;g__Blautia;s__Blautia sp. CAG:237	0.799573	4.02786e-07	0.00048967	BMI, Age, gender, usual stool type, history of antibiotic usage
Diseases	Gout (M10)	k__Bacteria;p__Bacteroidetes;c__Bacteroidia;o__Bacteroidales;f__Bacteroidaceae;g__Bacteroides;s__Bacteroides nordii	0.910258	4.06807e-07	0.000494813	BMI, Age, gender, usual stool type, history of antibiotic usage
Diseases	Gout (M10)	k__Bacteria;p__Bacteroidetes;c__Bacteroidia;o__Bacteroidales;f__Bacteroidaceae;g__Bacteroides;s__Bacteroides faecis CAG:32	1.00116	4.11504e-07	0.000500475	BMI, Age, gender, usual stool type, history of antibiotic usage
Diseases	Gout (M10)	k__Bacteria;p__Bacteroidetes;c__Bacteroidia;o__Bacteroidales;f__Bacteroidaceae;g__Bacteroides;s__Bacteroides sp. 2_2_4	1.15819	5.18511e-07	0.000628957	BMI, Age, gender, usual stool type, history of antibiotic usage
Diseases	Gout (M10)	k__Bacteria;p__Firmicutes;c__Clostridia;o__Clostridiales;f__Ruminococcaceae;g__Unclassified;s__Ruminococcaceae bacterium Marseille-P2935	-0.800519	5.72675e-07	0.00068672	BMI, Age, gender, usual stool type, history of antibiotic usage
Diseases	Gout (M10)	k__Bacteria;p__Bacteroidetes;c__Bacteroidia;o__Bacteroidales;f__Rikenellaceae;g__Alistipes;s__Alistipes sp. 58_9_plus	1.00819	5.90138e-07	0.000714782	BMI, Age, gender, usual stool type, history of antibiotic usage
Diseases	Gout (M10)	k__Bacteria;p__Bacteroidetes;c__Bacteroidia;o__Bacteroidales;f__Bacteroidaceae;g__Bacteroides;s__Bacteroides fragilis CAG:558	0.899398	6.09458e-07	0.000737842	BMI, Age, gender, usual stool type, history of antibiotic usage
Diseases	Gout (M10)	k__Bacteria;p__Bacteroidetes;c__Bacteroidia;o__Bacteroidales;f__Bacteroidaceae;g__Bacteroides;s__Bacteroides sp. 3_1_19	1.22106	6.38071e-07	0.000771988	BMI, Age, gender, usual stool type, history of antibiotic usage
Diseases	Gout (M10)	k__Bacteria;p__Bacteroidetes;c__Bacteroidia;o__Bacteroidales;f__Bacteroidaceae;g__Bacteroides;s__Bacteroides sp. 3_1_40A	1.1777	6.64051e-07	0.000803095	BMI, Age, gender, usual stool type, history of antibiotic usage
Diseases	Gout (M10)	k__Bacteria;p__Bacteroidetes;c__Bacteroidia;o__Bacteroidales;f__Bacteroidaceae;g__Bacteroides;s__Bacteroides sp. OM05-10AA	1.24376	7.04332e-07	0.000851384	BMI, Age, gender, usual stool type, history of antibiotic usage
Diseases	Gout (M10)	k__Bacteria;p__Bacteroidetes;c__Bacteroidia;o__Bacteroidales;f__Porphyromonadaceae;g__Porphyromonas;s__Porphyromonas sp. 31_2	1.13715	8.31618e-07	0.00100279	BMI, Age, gender, usual stool type, history of antibiotic usage
Diseases	Gout (M10)	k__Bacteria;p__Proteobacteria;c__Betaproteobacteria;o__Burkholderiales;f__Alcaligenaceae;g__Achromobacter;s__Achromobacter xylosoxidans	0.582465	1.01186e-06	0.00121799	BMI, Age, gender, usual stool type, history of antibiotic usage
Diseases	Gout (M10)	k__Bacteria;p__Bacteroidetes;c__Bacteroidia;o__Bacteroidales;f__Bacteroidaceae;g__Bacteroides;s__Bacteroides fragilis	0.953377	1.04535e-06	0.00125932	BMI, Age, gender, usual stool type, history of antibiotic usage
Diseases	Gout (M10)	k__Bacteria;p__Firmicutes;c__Unclassified;o__Unclassified;f__Unclassified;g__Unclassified;s__Firmicutes bacterium CAG:272_52_7	-1.74817	1.17775e-06	0.00134731	BMI, Age, gender, usual stool type, history of antibiotic usage
Diseases	Gout (M10)	k__Eukaryota;p__Arthropoda;c__Arachnida;o__Araneae;f__Araneidae;g__Nephila;s__Nephila clavipes	0.467072	1.27994e-06	0.00153518	BMI, Age, gender, usual stool type, history of antibiotic usage
Diseases	Gout (M10)	k__Bacteria;p__Bacteroidetes;c__Bacteroidia;o__Bacteroidales;f__Bacteroidaceae;g__Bacteroides;s__Bacteroides faecichinchillae	0.884851	1.30323e-06	0.00156457	BMI, Age, gender, usual stool type, history of antibiotic usage
Diseases	Gout (M10)	k__Bacteria;p__Bacteroidetes;c__Bacteroidia;o__Bacteroidales;f__Tannerellaceae;g__Parabacteroides;s__Parabacteroides sp. 20_3	1.01051	1.31351e-06	0.00157681	BMI, Age, gender, usual stool type, history of antibiotic usage
Diseases	Gout (M10)	k__Bacteria;p__Bacteroidetes;c__Bacteroidia;o__Bacteroidales;f__Tannerellaceae;g__Parabacteroides;s__Parabacteroides sp. CAG:2	0.965021	1.32307e-06	0.00158753	BMI, Age, gender, usual stool type, history of antibiotic usage
Diseases	Gout (M10)	k__Bacteria;p__Proteobacteria;c__Gammaproteobacteria;o__Chromatiales;f__Chromatiaceae;g__Thiocapsa;s__Thiocapsa sp. KS1	0.530176	1.47244e-06	0.0017632	BMI, Age, gender, usual stool type, history of antibiotic usage
Diseases	Gout (M10)	k__Bacteria;p__Proteobacteria;c__Betaproteobacteria;o__Burkholderiales;f__Burkholderiaceae;g__Burkholderia;s__Burkholderia pseudomallei	0.481666	1.47972e-06	0.0017725	BMI, Age, gender, usual stool type, history of antibiotic usage
Diseases	Gout (M10)	k__Bacteria;p__Bacteroidetes;c__Bacteroidia;o__Bacteroidales;f__Bacteroidaceae;g__Bacteroides;s__Bacteroides clarus	1.17424	1.51151e-06	0.00181005	BMI, Age, gender, usual stool type, history of antibiotic usage
Diseases	Gout (M10)	k__Bacteria;p__Proteobacteria;c__Betaproteobacteria;o__Burkholderiales;f__Sutterellaceae;g__Sutterella;s__Sutterella wadsworthensis CAG:135	0.971102	1.78686e-06	0.00213257	BMI, Age, gender, usual stool type, history of antibiotic usage
Diseases	Gout (M10)	k__Bacteria;p__Proteobacteria;c__Gammaproteobacteria;o__Xanthomonadales;f__Xanthomonadaceae;g__Stenotrophomonas;s__Stenotrophomonas maltophilia	0.608598	1.82621e-06	0.00217481	BMI, Age, gender, usual stool type, history of antibiotic usage
Diseases	Gout (M10)	k__Bacteria;p__Bacteroidetes;c__Bacteroidia;o__Bacteroidales;f__Rikenellaceae;g__Alistipes;s__Alistipes finegoldii CAG:68	0.724944	1.95554e-06	0.00232992	BMI, Age, gender, usual stool type, history of antibiotic usage
Diseases	Gout (M10)	k__Bacteria;p__Bacteroidetes;c__Bacteroidia;o__Bacteroidales;f__Bacteroidaceae;g__Bacteroides;s__Bacteroides sp. D22	1.17417	1.99407e-06	0.00237394	BMI, Age, gender, usual stool type, history of antibiotic usage
Diseases	Gout (M10)	k__Bacteria;p__Bacteroidetes;c__Bacteroidia;o__Bacteroidales;f__Bacteroidaceae;g__Bacteroides;s__Bacteroides sp. 1_1_30	1.06576	2.01011e-06	0.00239306	BMI, Age, gender, usual stool type, history of antibiotic usage
Diseases	Gout (M10)	k__Bacteria;p__Bacteroidetes;c__Bacteroidia;o__Bacteroidales;f__Bacteroidaceae;g__Bacteroides;s__Bacteroides thetaiotaomicron CAG:40	0.989444	2.03301e-06	0.00241995	BMI, Age, gender, usual stool type, history of antibiotic usage
Diseases	Gout (M10)	k__Bacteria;p__Proteobacteria;c__Gammaproteobacteria;o__Pseudomonadales;f__Pseudomonadaceae;g__Pseudomonas;s__Pseudomonas syringae group genomosp. 3	0.558919	2.15738e-06	0.00256288	BMI, Age, gender, usual stool type, history of antibiotic usage
Diseases	Gout (M10)	k__Bacteria;p__Proteobacteria;c__Gammaproteobacteria;o__Oceanospirillales;f__Halomonadaceae;g__Zymobacter;s__Zymobacter palmae	0.612901	2.29056e-06	0.002719	BMI, Age, gender, usual stool type, history of antibiotic usage
Diseases	Gout (M10)	k__Bacteria;p__Bacteroidetes;c__Bacteroidia;o__Bacteroidales;f__Bacteroidaceae;g__Bacteroides;s__Bacteroides dorei CAG:222	0.958462	2.3437e-06	0.00278102	BMI, Age, gender, usual stool type, history of antibiotic usage
Diseases	Gout (M10)	k__Bacteria;p__Firmicutes;c__Clostridia;o__Clostridiales;f__Catabacteriaceae;g__Catabacter;s__Catabacter hongkongensis	-0.995593	2.66429e-06	0.00298489	BMI, Age, gender, usual stool type, history of antibiotic usage
Diseases	Gout (M10)	k__Bacteria;p__Proteobacteria;c__Alphaproteobacteria;o__Rhodospirillales;f__Rhodospirillaceae;g__Nitrospirillum;s__Nitrospirillum amazonense	0.497931	2.64496e-06	0.00312634	BMI, Age, gender, usual stool type, history of antibiotic usage
Diseases	Gout (M10)	k__Bacteria;p__Bacteroidetes;c__Bacteroidia;o__Bacteroidales;f__Bacteroidaceae;g__Bacteroides;s__Bacteroides caccae CAG:21	0.843226	2.90432e-06	0.00343101	BMI, Age, gender, usual stool type, history of antibiotic usage
Diseases	Gout (M10)	k__Bacteria;p__Proteobacteria;c__Alphaproteobacteria;o__Rhizobiales;f__Rhizobiaceae;g__Rhizobium;s__Rhizobium freirei	0.502816	2.98402e-06	0.00351758	BMI, Age, gender, usual stool type, history of antibiotic usage
Diseases	Gout (M10)	k__Bacteria;p__Proteobacteria;c__Betaproteobacteria;o__Burkholderiales;f__Burkholderiaceae;g__Burkholderia;s__Burkholderia mallei	0.639782	3.03321e-06	0.00356404	BMI, Age, gender, usual stool type, history of antibiotic usage
Diseases	Gout (M10)	k__Bacteria;p__Bacteroidetes;c__Bacteroidia;o__Bacteroidales;f__Bacteroidaceae;g__Bacteroides;s__Bacteroides sp. AM56-10ce	1.36175	3.0525e-06	0.0035889	BMI, Age, gender, usual stool type, history of antibiotic usage
Diseases	Gout (M10)	k__Bacteria;p__Bacteroidetes;c__Bacteroidia;o__Bacteroidales;f__Bacteroidaceae;g__Bacteroides;s__Bacteroides sp. 3_1_23	0.928585	3.10473e-06	0.00365736	BMI, Age, gender, usual stool type, history of antibiotic usage
Diseases	Gout (M10)	k__Bacteria;p__Proteobacteria;c__Gammaproteobacteria;o__Enterobacterales;f__Enterobacteriaceae;g__Cronobacter;s__Cronobacter sakazakii	0.515074	3.15642e-06	0.00371321	BMI, Age, gender, usual stool type, history of antibiotic usage
Diseases	Gout (M10)	k__Bacteria;p__Bacteroidetes;c__Bacteroidia;o__Bacteroidales;f__Bacteroidaceae;g__Bacteroides;s__Bacteroides dorei	1.063	3.22905e-06	0.00380393	BMI, Age, gender, usual stool type, history of antibiotic usage
Diseases	Gout (M10)	k__Bacteria;p__Firmicutes;c__Clostridia;o__Clostridiales;f__Ruminococcaceae;g__Papillibacter;s__Papillibacter cinnamivorans	-0.767972	3.32918e-06	0.00383328	BMI, Age, gender, usual stool type, history of antibiotic usage
Diseases	Gout (M10)	k__Bacteria;p__Firmicutes;c__Clostridia;o__Unclassified;f__Unclassified;g__Unclassified;s__Clostridia bacterium	-0.887803	3.32204e-06	0.00390179	BMI, Age, gender, usual stool type, history of antibiotic usage
Diseases	Gout (M10)	k__Bacteria;p__Bacteroidetes;c__Bacteroidia;o__Bacteroidales;f__Bacteroidaceae;g__Bacteroides;s__Bacteroides sp. 9_1_42FAA	0.838398	3.38857e-06	0.00398233	BMI, Age, gender, usual stool type, history of antibiotic usage
Diseases	Gout (M10)	k__Bacteria;p__Proteobacteria;c__Gammaproteobacteria;o__Pseudomonadales;f__Pseudomonadaceae;g__Pseudomonas;s__Pseudomonas aeruginosa	0.406395	3.49507e-06	0.00410032	BMI, Age, gender, usual stool type, history of antibiotic usage
Diseases	Gout (M10)	k__Bacteria;p__Bacteroidetes;c__Bacteroidia;o__Bacteroidales;f__Bacteroidaceae;g__Bacteroides;s__Bacteroides sp. HMSC068A09	1.27429	3.5796e-06	0.00419279	BMI, Age, gender, usual stool type, history of antibiotic usage
Diseases	Gout (M10)	k__Bacteria;p__Bacteroidetes;c__Bacteroidia;o__Bacteroidales;f__Unclassified;g__Unclassified;s__Bacteroidales bacterium Barb7	0.733592	3.57527e-06	0.00419355	BMI, Age, gender, usual stool type, history of antibiotic usage
Diseases	Gout (M10)	k__Bacteria;p__Bacteroidetes;c__Bacteroidia;o__Bacteroidales;f__Bacteroidaceae;g__Bacteroides;s__Bacteroides sp. 3_1_13	1.21302	3.64246e-06	0.00426219	BMI, Age, gender, usual stool type, history of antibiotic usage
Diseases	Gout (M10)	k__Bacteria;p__Bacteroidetes;c__Bacteroidia;o__Bacteroidales;f__Bacteroidaceae;g__Bacteroides;s__Bacteroides xylanisolvens	0.754976	3.64329e-06	0.00426964	BMI, Age, gender, usual stool type, history of antibiotic usage
Diseases	Gout (M10)	k__Bacteria;p__Bacteroidetes;c__Bacteroidia;o__Bacteroidales;f__Bacteroidaceae;g__Bacteroides;s__Bacteroides clarus CAG:160	0.850184	3.71568e-06	0.00435035	BMI, Age, gender, usual stool type, history of antibiotic usage
Diseases	Gout (M10)	k__Bacteria;p__Bacteroidetes;c__Bacteroidia;o__Bacteroidales;f__Rikenellaceae;g__Alistipes;s__Alistipes finegoldii	1.056	3.91784e-06	0.00457514	BMI, Age, gender, usual stool type, history of antibiotic usage
Diseases	Gout (M10)	k__Bacteria;p__Proteobacteria;c__Gammaproteobacteria;o__Enterobacterales;f__Enterobacteriaceae;g__Cronobacter;s__Cronobacter dublinensis	0.644781	3.96941e-06	0.00463236	BMI, Age, gender, usual stool type, history of antibiotic usage
Diseases	Gout (M10)	k__Bacteria;p__Bacteroidetes;c__Bacteroidia;o__Bacteroidales;f__Tannerellaceae;g__Parabacteroides;s__Parabacteroides johnsonii CAG:246	0.760258	3.99908e-06	0.00466578	BMI, Age, gender, usual stool type, history of antibiotic usage
Diseases	Gout (M10)	k__Bacteria;p__Bacteroidetes;c__Bacteroidia;o__Bacteroidales;f__Unclassified;g__Unclassified;s__Bacteroidales bacterium Barb6XT	0.785498	4.06989e-06	0.00474616	BMI, Age, gender, usual stool type, history of antibiotic usage
Diseases	Gout (M10)	k__Bacteria;p__Bacteroidetes;c__Bacteroidia;o__Bacteroidales;f__Rikenellaceae;g__Alistipes;s__Alistipes sp. HGB5	1.02391	4.26623e-06	0.00496534	BMI, Age, gender, usual stool type, history of antibiotic usage
Diseases	Gout (M10)	k__Bacteria;p__Proteobacteria;c__Gammaproteobacteria;o__Xanthomonadales;f__Xanthomonadaceae;g__Xanthomonas;s__Xanthomonas citri	0.430103	4.30816e-06	0.00501406	BMI, Age, gender, usual stool type, history of antibiotic usage
Diseases	Gout (M10)	k__Bacteria;p__Bacteroidetes;c__Bacteroidia;o__Bacteroidales;f__Odoribacteraceae;g__Odoribacter;s__Odoribacter splanchnicus CAG:14	0.745087	4.31557e-06	0.00502229	BMI, Age, gender, usual stool type, history of antibiotic usage
Diseases	Gout (M10)	k__Bacteria;p__Bacteroidetes;c__Bacteroidia;o__Bacteroidales;f__Bacteroidaceae;g__Bacteroides;s__Bacteroides thetaiotaomicron	0.964591	4.40529e-06	0.00512017	BMI, Age, gender, usual stool type, history of antibiotic usage
Diseases	Gout (M10)	k__Bacteria;p__Bacteroidetes;c__Bacteroidia;o__Bacteroidales;f__Bacteroidaceae;g__Bacteroides;s__Bacteroides fragilis CAG:47	0.877146	4.53843e-06	0.00527172	BMI, Age, gender, usual stool type, history of antibiotic usage
Diseases	Gout (M10)	k__Bacteria;p__Proteobacteria;c__Alphaproteobacteria;o__Rhizobiales;f__Rhizobiaceae;g__Rhizobium;s__Rhizobium etli	0.393765	5.04844e-06	0.00584525	BMI, Age, gender, usual stool type, history of antibiotic usage
Diseases	Gout (M10)	k__Bacteria;p__Bacteroidetes;c__Bacteroidia;o__Bacteroidales;f__Bacteroidaceae;g__Bacteroides;s__Bacteroides eggerthii CAG:109	0.807477	5.17553e-06	0.00598875	BMI, Age, gender, usual stool type, history of antibiotic usage
Diseases	Gout (M10)	k__Bacteria;p__Proteobacteria;c__Betaproteobacteria;o__Burkholderiales;f__Burkholderiaceae;g__Cupriavidus;s__Cupriavidus taiwanensis	0.443816	5.29381e-06	0.0061212	BMI, Age, gender, usual stool type, history of antibiotic usage
Diseases	Gout (M10)	k__Bacteria;p__Bacteroidetes;c__Bacteroidia;o__Bacteroidales;f__Bacteroidaceae;g__Bacteroides;s__Bacteroides intestinalis CAG:564	0.868809	5.83421e-06	0.00672915	BMI, Age, gender, usual stool type, history of antibiotic usage
Diseases	Gout (M10)	k__Bacteria;p__Bacteroidetes;c__Flavobacteriia;o__Flavobacteriales;f__Flavobacteriaceae;g__Ornithobacterium;s__Ornithobacterium rhinotracheale	0.791626	6.14898e-06	0.00708083	BMI, Age, gender, usual stool type, history of antibiotic usage
Diseases	Gout (M10)	k__Bacteria;p__Bacteroidetes;c__Bacteroidia;o__Bacteroidales;f__Bacteroidaceae;g__Bacteroides;s__Bacteroides intestinalis CAG:315	0.916107	6.21301e-06	0.00715481	BMI, Age, gender, usual stool type, history of antibiotic usage
Diseases	Gout (M10)	k__Bacteria;p__Bacteroidetes;c__Bacteroidia;o__Bacteroidales;f__Tannerellaceae;g__Parabacteroides;s__Parabacteroides merdae CAG:48	0.743798	6.32967e-06	0.00728508	BMI, Age, gender, usual stool type, history of antibiotic usage
Diseases	Gout (M10)	k__Bacteria;p__Firmicutes;c__Clostridia;o__Clostridiales;f__Unclassified;g__Unclassified;s__Clostridiales bacterium 43-6	-1.22991	6.77879e-06	0.00757444	BMI, Age, gender, usual stool type, history of antibiotic usage
Diseases	Gout (M10)	k__Bacteria;p__Bacteroidetes;c__Bacteroidia;o__Bacteroidales;f__Tannerellaceae;g__Parabacteroides;s__Parabacteroides johnsonii	1.01266	6.81106e-06	0.00782347	BMI, Age, gender, usual stool type, history of antibiotic usage
Diseases	Gout (M10)	k__Bacteria;p__Tenericutes;c__Mollicutes;o__Anaeroplasmatales;f__Anaeroplasmataceae;g__Anaeroplasma;s__Anaeroplasma bactoclasticum	-1.87141	7.3084e-06	0.00804654	BMI, Age, gender, usual stool type, history of antibiotic usage
Diseases	Gout (M10)	k__Bacteria;p__Bacteroidetes;c__Bacteroidia;o__Bacteroidales;f__Bacteroidaceae;g__Bacteroides;s__Bacteroides sp. KFT8	1.1683	7.0235e-06	0.00805645	BMI, Age, gender, usual stool type, history of antibiotic usage
Diseases	Gout (M10)	k__Bacteria;p__Bacteroidetes;c__Bacteroidia;o__Bacteroidales;f__Bacteroidaceae;g__Bacteroides;s__Bacteroides sp. CF01-10NS	1.34417	7.33589e-06	0.0083995	BMI, Age, gender, usual stool type, history of antibiotic usage
Diseases	Gout (M10)	k__Bacteria;p__Bacteroidetes;c__Bacteroidia;o__Bacteroidales;f__Odoribacteraceae;g__Odoribacter;s__Odoribacter sp. 43_10	0.898009	7.39017e-06	0.00845138	BMI, Age, gender, usual stool type, history of antibiotic usage
Diseases	Gout (M10)	k__Bacteria;p__Bacteroidetes;c__Bacteroidia;o__Bacteroidales;f__Bacteroidaceae;g__Bacteroides;s__Bacteroides sp. 1_1_14	1.1231	7.55597e-06	0.00865186	BMI, Age, gender, usual stool type, history of antibiotic usage
Diseases	Gout (M10)	k__Bacteria;p__Bacteroidetes;c__Bacteroidia;o__Bacteroidales;f__Unclassified;g__Unclassified;s__Bacteroidales bacterium Barb6	0.740584	7.81884e-06	0.00894799	BMI, Age, gender, usual stool type, history of antibiotic usage
Diseases	Gout (M10)	k__Bacteria;p__Proteobacteria;c__Betaproteobacteria;o__Rhodocyclales;f__Zoogloeaceae;g__Thauera;s__Thauera phenylacetica	0.787623	7.97754e-06	0.00911447	BMI, Age, gender, usual stool type, history of antibiotic usage
Diseases	Gout (M10)	k__Bacteria;p__Bacteroidetes;c__Bacteroidia;o__Bacteroidales;f__Bacteroidaceae;g__Bacteroides;s__Bacteroides stercoris CAG:120	0.839832	8.58318e-06	0.00979814	BMI, Age, gender, usual stool type, history of antibiotic usage
Diseases	Gout (M10)	k__Bacteria;p__Cyanobacteria;c__Unclassified;o__Nostocales;f__Tolypothrichaceae;g__Tolypothrix;s__Tolypothrix campylonemoides	0.45175	8.7964e-06	0.0100296	BMI, Age, gender, usual stool type, history of antibiotic usage
Diseases	Gout (M10)	k__Bacteria;p__Bacteroidetes;c__Bacteroidia;o__Bacteroidales;f__Bacteroidaceae;g__Bacteroides;s__Bacteroides sp. D1	1.02332	9.33406e-06	0.010615	BMI, Age, gender, usual stool type, history of antibiotic usage
Diseases	Gout (M10)	k__Bacteria;p__Bacteroidetes;c__Bacteroidia;o__Bacteroidales;f__Bacteroidaceae;g__Bacteroides;s__Bacteroides vulgatus	1.00432	9.64854e-06	0.0109738	BMI, Age, gender, usual stool type, history of antibiotic usage
Diseases	Gout (M10)	k__Bacteria;p__Bacteroidetes;c__Bacteroidia;o__Bacteroidales;f__Bacteroidaceae;g__Bacteroides;s__Bacteroides sartorii	0.977437	9.65873e-06	0.0109839	BMI, Age, gender, usual stool type, history of antibiotic usage
Diseases	Gout (M10)	k__Bacteria;p__Bacteroidetes;c__Bacteroidia;o__Bacteroidales;f__Porphyromonadaceae;g__Unclassified;s__Porphyromonadaceae bacterium KA00676	0.855179	9.86239e-06	0.011198	BMI, Age, gender, usual stool type, history of antibiotic usage
Diseases	Gout (M10)	k__Bacteria;p__Actinobacteria;c__Coriobacteriia;o__Eggerthellales;f__Eggerthellaceae;g__Eggerthella;s__Eggerthella sp. CAG:1427	0.410517	1.02147e-05	0.0115966	BMI, Age, gender, usual stool type, history of antibiotic usage
Diseases	Gout (M10)	k__Bacteria;p__Firmicutes;c__Clostridia;o__Clostridiales;f__Ruminococcaceae;g__Neglecta;s__Neglecta timonensis	-0.625336	1.04703e-05	0.0117714	BMI, Age, gender, usual stool type, history of antibiotic usage
Diseases	Gout (M10)	k__Bacteria;p__Proteobacteria;c__Betaproteobacteria;o__Burkholderiales;f__Comamonadaceae;g__Hydrogenophaga;s__Hydrogenophaga sp. T4	0.494298	1.12704e-05	0.0127496	BMI, Age, gender, usual stool type, history of antibiotic usage
Diseases	Gout (M10)	k__Bacteria;p__Bacteroidetes;c__Bacteroidia;o__Bacteroidales;f__Bacteroidaceae;g__Bacteroides;s__Bacteroides sp. CAG:754	0.719859	1.17377e-05	0.013279	BMI, Age, gender, usual stool type, history of antibiotic usage
Diseases	Gout (M10)	k__Bacteria;p__Bacteroidetes;c__Bacteroidia;o__Bacteroidales;f__Rikenellaceae;g__Alistipes;s__Alistipes sp. CHKCI003	0.719861	1.18576e-05	0.0134074	BMI, Age, gender, usual stool type, history of antibiotic usage
Diseases	Gout (M10)	k__Bacteria;p__Bacteroidetes;c__Bacteroidia;o__Bacteroidales;f__Bacteroidaceae;g__Bacteroides;s__Bacteroides sp. 2_1_22	1.00099	1.23551e-05	0.0139507	BMI, Age, gender, usual stool type, history of antibiotic usage
Diseases	Gout (M10)	k__Bacteria;p__Bacteroidetes;c__Bacteroidia;o__Bacteroidales;f__Bacteroidaceae;g__Bacteroides;s__Bacteroides sp. 4_3_47FAA	1.07733	1.29969e-05	0.0146601	BMI, Age, gender, usual stool type, history of antibiotic usage
Diseases	Gout (M10)	k__Bacteria;p__Proteobacteria;c__Betaproteobacteria;o__Burkholderiales;f__Burkholderiaceae;g__Ralstonia;s__Ralstonia solanacearum	0.463721	1.30161e-05	0.0146703	BMI, Age, gender, usual stool type, history of antibiotic usage
Diseases	Gout (M10)	k__Bacteria;p__Proteobacteria;c__Gammaproteobacteria;o__Enterobacterales;f__Enterobacteriaceae;g__Salmonella;s__Salmonella enterica	0.573566	1.30292e-05	0.0146977	BMI, Age, gender, usual stool type, history of antibiotic usage
Diseases	Gout (M10)	k__Bacteria;p__Bacteroidetes;c__Bacteroidia;o__Bacteroidales;f__Bacteroidaceae;g__Bacteroides;s__Bacteroides finegoldii CAG:203	0.795899	1.43517e-05	0.0161481	BMI, Age, gender, usual stool type, history of antibiotic usage
Diseases	Gout (M10)	k__Bacteria;p__Firmicutes;c__Unclassified;o__Unclassified;f__Unclassified;g__Unclassified;s__Firmicutes bacterium CAG:449	-1.58532	1.46892e-05	0.0163206	BMI, Age, gender, usual stool type, history of antibiotic usage
Diseases	Gout (M10)	k__Viruses;p__Unclassified;c__Unclassified;o__Unclassified;f__Unclassified;g__Unclassified;s__unidentified phage	-0.671456	1.55417e-05	0.0173625	BMI, Age, gender, usual stool type, history of antibiotic usage
Diseases	Gout (M10)	k__Bacteria;p__Bacteroidetes;c__Bacteroidia;o__Bacteroidales;f__Porphyromonadaceae;g__Porphyromonas;s__Porphyromonas gingivalis	0.650178	1.57267e-05	0.017646	BMI, Age, gender, usual stool type, history of antibiotic usage
Diseases	Gout (M10)	k__Bacteria;p__Firmicutes;c__Clostridia;o__Clostridiales;f__Eubacteriaceae;g__Eubacterium;s__Eubacterium sp. CAG:841	-1.34904	1.76031e-05	0.019557	BMI, Age, gender, usual stool type, history of antibiotic usage
Diseases	Gout (M10)	k__Bacteria;p__Firmicutes;c__Unclassified;o__Unclassified;f__Unclassified;g__Unclassified;s__Firmicutes bacterium CAG:24053_14	-0.6136	1.82326e-05	0.0203503	BMI, Age, gender, usual stool type, history of antibiotic usage
Diseases	Gout (M10)	k__Bacteria;p__Bacteroidetes;c__Bacteroidia;o__Bacteroidales;f__Bacteroidaceae;g__Bacteroides;s__Bacteroides uniformis CAG:3	0.890965	1.83852e-05	0.0205501	BMI, Age, gender, usual stool type, history of antibiotic usage
Diseases	Gout (M10)	k__Bacteria;p__Bacteroidetes;c__Bacteroidia;o__Bacteroidales;f__Rikenellaceae;g__Alistipes;s__Alistipes sp. CAG:29	0.880061	1.88177e-05	0.021017	BMI, Age, gender, usual stool type, history of antibiotic usage
Diseases	Gout (M10)	k__Bacteria;p__Bacteroidetes;c__Bacteroidia;o__Bacteroidales;f__Bacteroidaceae;g__Bacteroides;s__Bacteroides sp. CAG:189	0.830014	1.94411e-05	0.0216801	BMI, Age, gender, usual stool type, history of antibiotic usage
Diseases	Gout (M10)	k__Bacteria;p__Proteobacteria;c__Gammaproteobacteria;o__Xanthomonadales;f__Xanthomonadaceae;g__Xanthomonas;s__Xanthomonas phaseoli	0.502011	1.98641e-05	0.0221093	BMI, Age, gender, usual stool type, history of antibiotic usage
Diseases	Gout (M10)	k__Bacteria;p__Proteobacteria;c__Betaproteobacteria;o__Neisseriales;f__Neisseriaceae;g__Neisseria;s__Neisseria meningitidis	0.433958	2.00935e-05	0.0223848	BMI, Age, gender, usual stool type, history of antibiotic usage
Diseases	Gout (M10)	k__Bacteria;p__Bacteroidetes;c__Bacteroidia;o__Bacteroidales;f__Bacteroidaceae;g__Bacteroides;s__Bacteroides sp. 43_46	1.34189	2.02823e-05	0.0225767	BMI, Age, gender, usual stool type, history of antibiotic usage
Diseases	Gout (M10)	k__Bacteria;p__Bacteroidetes;c__Bacteroidia;o__Bacteroidales;f__Bacteroidaceae;g__Bacteroides;s__Bacteroides sp. AM37-9	1.2282	2.09091e-05	0.0232382	BMI, Age, gender, usual stool type, history of antibiotic usage
Diseases	Gout (M10)	k__Bacteria;p__Bacteroidetes;c__Bacteroidia;o__Bacteroidales;f__Bacteroidaceae;g__Bacteroides;s__Bacteroides vulgatus CAG:6	0.964434	2.12437e-05	0.0236319	BMI, Age, gender, usual stool type, history of antibiotic usage
Diseases	Gout (M10)	k__Bacteria;p__Bacteroidetes;c__Bacteroidia;o__Bacteroidales;f__Bacteroidaceae;g__Bacteroides;s__Bacteroides coprophilus CAG:333	0.974696	2.17826e-05	0.0242128	BMI, Age, gender, usual stool type, history of antibiotic usage
Diseases	Gout (M10)	k__Bacteria;p__Proteobacteria;c__Betaproteobacteria;o__Burkholderiales;f__Comamonadaceae;g__Variovorax;s__Variovorax sp. WDL1	0.667465	2.31173e-05	0.0256061	BMI, Age, gender, usual stool type, history of antibiotic usage
Diseases	Gout (M10)	k__Bacteria;p__Firmicutes;c__Erysipelotrichia;o__Erysipelotrichales;f__Erysipelotrichaceae;g__Coprobacillus;s__Coprobacillus sp. CAG:698	-2.05901	2.40262e-05	0.0257906	BMI, Age, gender, usual stool type, history of antibiotic usage
Diseases	Gout (M10)	k__Bacteria;p__Proteobacteria;c__Gammaproteobacteria;o__Enterobacterales;f__Enterobacteriaceae;g__Enterobacter;s__Enterobacter ludwigii	0.608949	2.32712e-05	0.025809	BMI, Age, gender, usual stool type, history of antibiotic usage
Diseases	Gout (M10)	k__Bacteria;p__Firmicutes;c__Clostridia;o__Clostridiales;f__Lachnospiraceae;g__Dorea;s__Dorea sp. 42_8	0.731787	2.66875e-05	0.0294337	BMI, Age, gender, usual stool type, history of antibiotic usage
Diseases	Gout (M10)	k__Bacteria;p__Bacteroidetes;c__Bacteroidia;o__Bacteroidales;f__Bacteroidaceae;g__Bacteroides;s__Bacteroides ovatus CAG:22	0.813906	2.66611e-05	0.029458	BMI, Age, gender, usual stool type, history of antibiotic usage
Diseases	Gout (M10)	k__Bacteria;p__Bacteroidetes;c__Bacteroidia;o__Bacteroidales;f__Bacteroidaceae;g__Bacteroides;s__Bacteroides sp. CAG:598	0.770484	2.71926e-05	0.0300237	BMI, Age, gender, usual stool type, history of antibiotic usage
Diseases	Gout (M10)	k__Bacteria;p__Firmicutes;c__Clostridia;o__Clostridiales;f__Lachnospiraceae;g__Blautia;s__[Ruminococcus] torques	0.681155	2.79275e-05	0.0308037	BMI, Age, gender, usual stool type, history of antibiotic usage
Diseases	Gout (M10)	k__Bacteria;p__Firmicutes;c__Unclassified;o__Unclassified;f__Unclassified;g__Unclassified;s__Firmicutes bacterium HGW-Firmicutes-16	-0.700983	2.87613e-05	0.031378	BMI, Age, gender, usual stool type, history of antibiotic usage
Diseases	Gout (M10)	k__Bacteria;p__Bacteroidetes;c__Bacteroidia;o__Bacteroidales;f__Bacteroidaceae;g__Bacteroides;s__Bacteroides finegoldii	0.996409	3.0012e-05	0.0330329	BMI, Age, gender, usual stool type, history of antibiotic usage
Diseases	Gout (M10)	k__Bacteria;p__Bacteroidetes;c__Cytophagia;o__Cytophagales;f__Flammeovirgaceae;g__Cesiribacter;s__Cesiribacter andamanensis	0.656521	3.12475e-05	0.0342924	BMI, Age, gender, usual stool type, history of antibiotic usage
Diseases	Gout (M10)	k__Bacteria;p__Firmicutes;c__Clostridia;o__Clostridiales;f__Ruminococcaceae;g__Unclassified;s__Ruminococcaceae bacterium FB2012	-1.12167	3.29602e-05	0.0349779	BMI, Age, gender, usual stool type, history of antibiotic usage
Diseases	Gout (M10)	k__Bacteria;p__Bacteroidetes;c__Bacteroidia;o__Bacteroidales;f__Rikenellaceae;g__Alistipes;s__Alistipes sp. CAG:53	0.666282	3.26075e-05	0.0357714	BMI, Age, gender, usual stool type, history of antibiotic usage
Diseases	Gout (M10)	k__Bacteria;p__Proteobacteria;c__Betaproteobacteria;o__Burkholderiales;f__Alcaligenaceae;g__Bordetella;s__Bordetella hinzii	0.518831	3.38177e-05	0.036079	BMI, Age, gender, usual stool type, history of antibiotic usage
Diseases	Gout (M10)	k__Bacteria;p__Proteobacteria;c__Deltaproteobacteria;o__Desulfovibrionales;f__Desulfovibrionaceae;g__Bilophila;s__Bilophila sp. 4_1_30	1.36423	3.31739e-05	0.0363442	BMI, Age, gender, usual stool type, history of antibiotic usage
Diseases	Gout (M10)	k__Bacteria;p__Bacteroidetes;c__Bacteroidia;o__Bacteroidales;f__Bacteroidaceae;g__Bacteroides;s__Bacteroides stercoris	1.22424	3.40694e-05	0.0373069	BMI, Age, gender, usual stool type, history of antibiotic usage
Diseases	Gout (M10)	k__Bacteria;p__Proteobacteria;c__Gammaproteobacteria;o__Enterobacterales;f__Enterobacteriaceae;g__Shigella;s__Shigella flexneri	0.826102	3.49273e-05	0.0382101	BMI, Age, gender, usual stool type, history of antibiotic usage
Diseases	Gout (M10)	k__Bacteria;p__Actinobacteria;c__Actinobacteria;o__Corynebacteriales;f__Mycobacteriaceae;g__Mycobacteroides;s__Mycobacteroides abscessus	0.366616	3.50224e-05	0.0383075	BMI, Age, gender, usual stool type, history of antibiotic usage
Diseases	Gout (M10)	k__Bacteria;p__Bacteroidetes;c__Bacteroidia;o__Bacteroidales;f__Bacteroidaceae;g__Bacteroides;s__Bacteroides fluxus	0.770594	3.59254e-05	0.0392574	BMI, Age, gender, usual stool type, history of antibiotic usage
Diseases	Gout (M10)	k__Bacteria;p__Bacteroidetes;c__Bacteroidia;o__Bacteroidales;f__Bacteroidaceae;g__Bacteroides;s__Bacteroides oleiciplenus	0.920812	3.72701e-05	0.0406587	BMI, Age, gender, usual stool type, history of antibiotic usage
Diseases	Gout (M10)	k__Bacteria;p__Firmicutes;c__Clostridia;o__Clostridiales;f__Peptococcaceae;g__Dehalobacter;s__Dehalobacter sp. FTH1	-1.19791	4.59282e-05	0.0459783	BMI, Age, gender, usual stool type, history of antibiotic usage
Diseases	Gout (M10)	k__Bacteria;p__Bacteroidetes;c__Bacteroidia;o__Bacteroidales;f__Bacteroidaceae;g__Bacteroides;s__Bacteroides sp. HPS0048	0.962739	4.28777e-05	0.0464987	BMI, Age, gender, usual stool type, history of antibiotic usage
Diseases	Gout (M10)	k__Bacteria;p__Bacteroidetes;c__Bacteroidia;o__Bacteroidales;f__Bacteroidaceae;g__Bacteroides;s__Bacteroides sp. AF17-1	1.26114	4.38488e-05	0.046604	BMI, Age, gender, usual stool type, history of antibiotic usage
Diseases	Gout (M10)	k__Bacteria;p__Firmicutes;c__Clostridia;o__Clostridiales;f__Clostridiaceae;g__Clostridium;s__Clostridium sp. CAG:389	-1.47821	4.39419e-05	0.0468174	BMI, Age, gender, usual stool type, history of antibiotic usage
Diseases	Gout (M10)	k__Bacteria;p__Proteobacteria;c__Gammaproteobacteria;o__Enterobacterales;f__Yersiniaceae;g__Serratia;s__Serratia marcescens	0.407687	4.31874e-05	0.0468593	BMI, Age, gender, usual stool type, history of antibiotic usage
Diseases	Gout (M10)	k__Bacteria;p__Unclassified;c__Unclassified;o__Unclassified;f__Unclassified;g__Unclassified;s__uncultured bacterium MedeBAC46A06	0.962694	4.37676e-05	0.0473908	BMI, Age, gender, usual stool type, history of antibiotic usage
Diseases	Hypertensive heart disease (I11)	k__Bacteria;p__Proteobacteria;c__Gammaproteobacteria;o__Enterobacterales;f__Enterobacteriaceae;g__Enterobacter;s__Enterobacter ludwigii	0.41102	1.58225e-08	1.94699e-05	BMI, Age, gender, usual stool type
Diseases	Hypertensive heart disease (I11)	k__Bacteria;p__Proteobacteria;c__Gammaproteobacteria;o__Pseudomonadales;f__Pseudomonadaceae;g__Pseudomonas;s__Pseudomonas putida	0.313499	1.9264e-08	2.36989e-05	BMI, Age, gender, usual stool type
Diseases	Hypertensive heart disease (I11)	k__Bacteria;p__Proteobacteria;c__Gammaproteobacteria;o__Oceanospirillales;f__Halomonadaceae;g__Zymobacter;s__Zymobacter palmae	0.356579	6.29511e-08	7.73167e-05	BMI, Age, gender, usual stool type
Diseases	Hypertensive heart disease (I11)	k__Bacteria;p__Proteobacteria;c__Gammaproteobacteria;o__Enterobacterales;f__Enterobacteriaceae;g__Shigella;s__Shigella flexneri	0.544282	7.62309e-08	9.35605e-05	BMI, Age, gender, usual stool type
Diseases	Hypertensive heart disease (I11)	k__Bacteria;p__Bacteroidetes;c__Cytophagia;o__Cytophagales;f__Flammeovirgaceae;g__Cesiribacter;s__Cesiribacter andamanensis	0.429485	7.89987e-08	9.6934e-05	BMI, Age, gender, usual stool type
Diseases	Hypertensive heart disease (I11)	k__Eukaryota;p__Ascomycota;c__Sordariomycetes;o__Hypocreales;f__Cordycipitaceae;g__Beauveria;s__Beauveria bassiana	0.254143	1.181e-07	0.000144717	BMI, Age, gender, usual stool type
Diseases	Hypertensive heart disease (I11)	k__Bacteria;p__Proteobacteria;c__Gammaproteobacteria;o__Enterobacterales;f__Enterobacteriaceae;g__Enterobacter;s__Enterobacter cloacae	0.283471	1.48144e-07	0.000181399	BMI, Age, gender, usual stool type
Diseases	Hypertensive heart disease (I11)	k__Bacteria;p__Proteobacteria;c__Gammaproteobacteria;o__Xanthomonadales;f__Xanthomonadaceae;g__Xanthomonas;s__Xanthomonas phaseoli	0.311974	1.79414e-07	0.000219426	BMI, Age, gender, usual stool type
Diseases	Hypertensive heart disease (I11)	k__Bacteria;p__Bacteroidetes;c__Bacteroidia;o__Bacteroidales;f__Bacteroidaceae;g__Bacteroides;s__Bacteroides thetaiotaomicron	0.557723	1.99908e-07	0.000244429	BMI, Age, gender, usual stool type
Diseases	Hypertensive heart disease (I11)	k__Bacteria;p__Proteobacteria;c__Betaproteobacteria;o__Burkholderiales;f__Burkholderiaceae;g__Ralstonia;s__Ralstonia solanacearum	0.279919	2.08584e-07	0.000254926	BMI, Age, gender, usual stool type
Diseases	Hypertensive heart disease (I11)	k__Bacteria;p__Proteobacteria;c__Gammaproteobacteria;o__Enterobacterales;f__Enterobacteriaceae;g__Salmonella;s__Salmonella enterica	0.343189	2.70215e-07	0.000329908	BMI, Age, gender, usual stool type
Diseases	Hypertensive heart disease (I11)	k__Bacteria;p__Cyanobacteria;c__Unclassified;o__Nostocales;f__Tolypothrichaceae;g__Tolypothrix;s__Tolypothrix campylonemoides	0.262877	3.37121e-07	0.000411068	BMI, Age, gender, usual stool type
Diseases	Hypertensive heart disease (I11)	k__Bacteria;p__Bacteroidetes;c__Bacteroidia;o__Bacteroidales;f__Bacteroidaceae;g__Bacteroides;s__Bacteroides intestinalis CAG:564	0.497456	3.64392e-07	0.000444148	BMI, Age, gender, usual stool type
Diseases	Hypertensive heart disease (I11)	k__Bacteria;p__Proteobacteria;c__Gammaproteobacteria;o__Pseudomonadales;f__Pseudomonadaceae;g__Pseudomonas;s__Pseudomonas amygdali	0.305064	4.03781e-07	0.000491873	BMI, Age, gender, usual stool type
Diseases	Hypertensive heart disease (I11)	k__Bacteria;p__Proteobacteria;c__Gammaproteobacteria;o__Enterobacterales;f__Enterobacteriaceae;g__Shigella;s__Shigella sonnei	0.434468	5.96081e-07	0.000725005	BMI, Age, gender, usual stool type
Diseases	Hypertensive heart disease (I11)	k__Bacteria;p__Bacteroidetes;c__Bacteroidia;o__Bacteroidales;f__Bacteroidaceae;g__Bacteroides;s__Bacteroides thetaiotaomicron CAG:40	0.529081	6.48987e-07	0.000788923	BMI, Age, gender, usual stool type
Diseases	Hypertensive heart disease (I11)	k__Bacteria;p__Proteobacteria;c__Gammaproteobacteria;o__Enterobacterales;f__Enterobacteriaceae;g__Cronobacter;s__Cronobacter sakazakii	0.277354	8.26712e-07	0.00100279	BMI, Age, gender, usual stool type
Diseases	Hypertensive heart disease (I11)	k__Bacteria;p__Bacteroidetes;c__Bacteroidia;o__Bacteroidales;f__Bacteroidaceae;g__Bacteroides;s__Bacteroides fragilis	0.494328	8.56487e-07	0.00103897	BMI, Age, gender, usual stool type
Diseases	Hypertensive heart disease (I11)	k__Bacteria;p__Proteobacteria;c__Betaproteobacteria;o__Burkholderiales;f__Burkholderiaceae;g__Cupriavidus;s__Cupriavidus taiwanensis	0.242328	9.10291e-07	0.00110339	BMI, Age, gender, usual stool type
Diseases	Hypertensive heart disease (I11)	k__Bacteria;p__Proteobacteria;c__Gammaproteobacteria;o__Pseudomonadales;f__Moraxellaceae;g__Acinetobacter;s__Acinetobacter baumannii	0.28369	9.58825e-07	0.0011618	BMI, Age, gender, usual stool type
Diseases	Hypertensive heart disease (I11)	k__Bacteria;p__Bacteroidetes;c__Bacteroidia;o__Bacteroidales;f__Bacteroidaceae;g__Bacteroides;s__Bacteroides intestinalis CAG:315	0.503614	1.16041e-06	0.00140362	BMI, Age, gender, usual stool type
Diseases	Hypertensive heart disease (I11)	k__Bacteria;p__Actinobacteria;c__Actinobacteria;o__Micrococcales;f__Micrococcaceae;g__Rothia;s__Rothia mucilaginosa	0.2426	1.31411e-06	0.00158751	BMI, Age, gender, usual stool type
Diseases	Hypertensive heart disease (I11)	k__Bacteria;p__Firmicutes;c__Unclassified;o__Unclassified;f__Unclassified;g__Unclassified;s__Firmicutes bacterium CAG:345	-1.21608	1.38599e-06	0.00166426	BMI, Age, gender, usual stool type
Diseases	Hypertensive heart disease (I11)	k__Bacteria;p__Proteobacteria;c__Gammaproteobacteria;o__Enterobacterales;f__Yersiniaceae;g__Serratia;s__Serratia marcescens	0.243246	1.55085e-06	0.00186924	BMI, Age, gender, usual stool type
Diseases	Hypertensive heart disease (I11)	k__Bacteria;p__Bacteroidetes;c__Bacteroidia;o__Bacteroidales;f__Rikenellaceae;g__Alistipes;s__Alistipes sp. CAG:157	0.398396	1.63557e-06	0.0019712	BMI, Age, gender, usual stool type
Diseases	Hypertensive heart disease (I11)	k__Eukaryota;p__Streptophyta;c__Unclassified;o__Malpighiales;f__Euphorbiaceae;g__Ricinus;s__Ricinus communis	0.321758	1.84198e-06	0.00220701	BMI, Age, gender, usual stool type
Diseases	Hypertensive heart disease (I11)	k__Bacteria;p__Unclassified;c__Unclassified;o__Unclassified;f__Unclassified;g__Unclassified;s__uncultured bacterium MedeBAC46A06	0.57423	1.8469e-06	0.00222042	BMI, Age, gender, usual stool type
Diseases	Hypertensive heart disease (I11)	k__Eukaryota;p__Arthropoda;c__Arachnida;o__Araneae;f__Araneidae;g__Nephila;s__Nephila clavipes	0.232904	1.88936e-06	0.00227047	BMI, Age, gender, usual stool type
Diseases	Hypertensive heart disease (I11)	k__Bacteria;p__Bacteroidetes;c__Bacteroidia;o__Bacteroidales;f__Unclassified;g__Unclassified;s__Bacteroidales bacterium Barb6	0.401598	1.92556e-06	0.00231594	BMI, Age, gender, usual stool type
Diseases	Hypertensive heart disease (I11)	k__Bacteria;p__Bacteroidetes;c__Bacteroidia;o__Bacteroidales;f__Unclassified;g__Unclassified;s__Bacteroidales bacterium Barb7	0.381848	2.27447e-06	0.00272841	BMI, Age, gender, usual stool type
Diseases	Hypertensive heart disease (I11)	k__Bacteria;p__Bacteroidetes;c__Bacteroidia;o__Bacteroidales;f__Bacteroidaceae;g__Bacteroides;s__Bacteroides sp. D1	0.555297	2.43086e-06	0.00290526	BMI, Age, gender, usual stool type
Diseases	Hypertensive heart disease (I11)	k__Bacteria;p__Proteobacteria;c__Gammaproteobacteria;o__Enterobacterales;f__Enterobacteriaceae;g__Cronobacter;s__Cronobacter universalis	0.370406	2.45203e-06	0.00293077	BMI, Age, gender, usual stool type
Diseases	Hypertensive heart disease (I11)	k__Bacteria;p__Bacteroidetes;c__Bacteroidia;o__Bacteroidales;f__Bacteroidaceae;g__Bacteroides;s__Bacteroides nordii	0.431107	2.53832e-06	0.00303831	BMI, Age, gender, usual stool type
Diseases	Hypertensive heart disease (I11)	k__Bacteria;p__Firmicutes;c__Bacilli;o__Lactobacillales;f__Streptococcaceae;g__Streptococcus;s__Streptococcus pneumoniae	0.201631	2.57325e-06	0.00307756	BMI, Age, gender, usual stool type
Diseases	Hypertensive heart disease (I11)	k__Bacteria;p__Proteobacteria;c__Betaproteobacteria;o__Neisseriales;f__Neisseriaceae;g__Neisseria;s__Neisseria meningitidis	0.242666	2.6909e-06	0.00321335	BMI, Age, gender, usual stool type
Diseases	Hypertensive heart disease (I11)	k__Bacteria;p__Bacteroidetes;c__Bacteroidia;o__Bacteroidales;f__Bacteroidaceae;g__Bacteroides;s__Bacteroides sp. CAG:189	0.462477	2.76412e-06	0.0033001	BMI, Age, gender, usual stool type
Diseases	Hypertensive heart disease (I11)	k__Bacteria;p__Bacteroidetes;c__Bacteroidia;o__Bacteroidales;f__Porphyromonadaceae;g__Porphyromonas;s__Porphyromonas crevioricanis	0.460798	2.80985e-06	0.00335184	BMI, Age, gender, usual stool type
Diseases	Hypertensive heart disease (I11)	k__Bacteria;p__Bacteroidetes;c__Bacteroidia;o__Bacteroidales;f__Bacteroidaceae;g__Bacteroides;s__Bacteroides uniformis CAG:3	0.495614	3.02585e-06	0.00360908	BMI, Age, gender, usual stool type
Diseases	Hypertensive heart disease (I11)	k__Bacteria;p__Proteobacteria;c__Gammaproteobacteria;o__Pseudomonadales;f__Pseudomonadaceae;g__Pseudomonas;s__Pseudomonas aeruginosa	0.207562	3.12286e-06	0.00371865	BMI, Age, gender, usual stool type
Diseases	Hypertensive heart disease (I11)	k__Bacteria;p__Bacteroidetes;c__Bacteroidia;o__Bacteroidales;f__Bacteroidaceae;g__Bacteroides;s__Bacteroides sp. AM54-2NS	0.631123	3.14424e-06	0.00373403	BMI, Age, gender, usual stool type
Diseases	Hypertensive heart disease (I11)	k__Bacteria;p__Bacteroidetes;c__Bacteroidia;o__Bacteroidales;f__Tannerellaceae;g__Parabacteroides;s__Parabacteroides merdae CAG:48	0.392105	3.1904e-06	0.00379868	BMI, Age, gender, usual stool type
Diseases	Hypertensive heart disease (I11)	k__Bacteria;p__Bacteroidetes;c__Bacteroidia;o__Bacteroidales;f__Bacteroidaceae;g__Bacteroides;s__Bacteroides clarus CAG:160	0.43612	3.36653e-06	0.0040013	BMI, Age, gender, usual stool type
Diseases	Hypertensive heart disease (I11)	k__Bacteria;p__Bacteroidetes;c__Bacteroidia;o__Bacteroidales;f__Tannerellaceae;g__Parabacteroides;s__Parabacteroides johnsonii CAG:246	0.390524	3.38373e-06	0.00402014	BMI, Age, gender, usual stool type
Diseases	Hypertensive heart disease (I11)	k__Bacteria;p__Bacteroidetes;c__Bacteroidia;o__Bacteroidales;f__Bacteroidaceae;g__Bacteroides;s__Bacteroides caccae CAG:21	0.426109	3.43075e-06	0.0040739	BMI, Age, gender, usual stool type
Diseases	Hypertensive heart disease (I11)	k__Bacteria;p__Tenericutes;c__Mollicutes;o__Mycoplasmatales;f__Mycoplasmataceae;g__Mycoplasma;s__Mycoplasma sp. CAG:956	-1.11788	3.51746e-06	0.00410902	BMI, Age, gender, usual stool type
Diseases	Hypertensive heart disease (I11)	k__Bacteria;p__Proteobacteria;c__Alphaproteobacteria;o__Rhizobiales;f__Rhizobiaceae;g__Rhizobium;s__Rhizobium freirei	0.253023	3.64503e-06	0.00432073	BMI, Age, gender, usual stool type
Diseases	Hypertensive heart disease (I11)	k__Bacteria;p__Bacteroidetes;c__Bacteroidia;o__Bacteroidales;f__Bacteroidaceae;g__Bacteroides;s__Bacteroides fluxus	0.439896	3.75327e-06	0.00444476	BMI, Age, gender, usual stool type
Diseases	Hypertensive heart disease (I11)	k__Bacteria;p__Bacteroidetes;c__Bacteroidia;o__Bacteroidales;f__Bacteroidaceae;g__Bacteroides;s__Bacteroides stercoris CAG:120	0.444824	3.80375e-06	0.00450212	BMI, Age, gender, usual stool type
Diseases	Hypertensive heart disease (I11)	k__Bacteria;p__Proteobacteria;c__Gammaproteobacteria;o__Vibrionales;f__Vibrionaceae;g__Vibrio;s__Vibrio cholerae	0.29367	3.88677e-06	0.00459792	BMI, Age, gender, usual stool type
Diseases	Hypertensive heart disease (I11)	k__Bacteria;p__Bacteroidetes;c__Bacteroidia;o__Bacteroidales;f__Unclassified;g__Unclassified;s__Bacteroidales bacterium Barb4	0.371348	4.01071e-06	0.0047404	BMI, Age, gender, usual stool type
Diseases	Hypertensive heart disease (I11)	k__Bacteria;p__Actinobacteria;c__Actinobacteria;o__Corynebacteriales;f__Mycobacteriaceae;g__Mycobacterium;s__Mycobacterium tuberculosis	0.199996	4.28778e-06	0.00505963	BMI, Age, gender, usual stool type
Diseases	Hypertensive heart disease (I11)	k__Bacteria;p__Proteobacteria;c__Betaproteobacteria;o__Burkholderiales;f__Alcaligenaceae;g__Achromobacter;s__Achromobacter xylosoxidans	0.277355	4.31653e-06	0.00509191	BMI, Age, gender, usual stool type
Diseases	Hypertensive heart disease (I11)	k__Bacteria;p__Proteobacteria;c__Gammaproteobacteria;o__Chromatiales;f__Chromatiaceae;g__Thiocapsa;s__Thiocapsa sp. KS1	0.257151	4.64312e-06	0.00546889	BMI, Age, gender, usual stool type
Diseases	Hypertensive heart disease (I11)	k__Bacteria;p__Bacteroidetes;c__Bacteroidia;o__Bacteroidales;f__Bacteroidaceae;g__Bacteroides;s__Bacteroides eggerthii CAG:109	0.412725	4.92426e-06	0.00579198	BMI, Age, gender, usual stool type
Diseases	Hypertensive heart disease (I11)	k__Bacteria;p__Proteobacteria;c__Gammaproteobacteria;o__Enterobacterales;f__Enterobacteriaceae;g__Cronobacter;s__Cronobacter dublinensis	0.326266	4.98665e-06	0.00586398	BMI, Age, gender, usual stool type
Diseases	Hypertensive heart disease (I11)	k__Bacteria;p__Proteobacteria;c__Gammaproteobacteria;o__Pseudomonadales;f__Pseudomonadaceae;g__Pseudomonas;s__Pseudomonas syringae	0.209286	4.9907e-06	0.00586697	BMI, Age, gender, usual stool type
Diseases	Hypertensive heart disease (I11)	k__Bacteria;p__Firmicutes;c__Clostridia;o__Clostridiales;f__Lachnospiraceae;g__Lachnoclostridium;s__[Clostridium] clostridioforme	0.279851	5.12864e-06	0.00602762	BMI, Age, gender, usual stool type
Diseases	Hypertensive heart disease (I11)	k__Bacteria;p__Bacteroidetes;c__Bacteroidia;o__Bacteroidales;f__Unclassified;g__Unclassified;s__Bacteroidales bacterium Barb6XT	0.395663	5.20241e-06	0.00611176	BMI, Age, gender, usual stool type
Diseases	Hypertensive heart disease (I11)	k__Bacteria;p__Bacteroidetes;c__Bacteroidia;o__Bacteroidales;f__Bacteroidaceae;g__Bacteroides;s__Bacteroides finegoldii CAG:203	0.423433	5.60915e-06	0.00658026	BMI, Age, gender, usual stool type
Diseases	Hypertensive heart disease (I11)	k__Bacteria;p__Firmicutes;c__Unclassified;o__Unclassified;f__Unclassified;g__Unclassified;s__Firmicutes bacterium CAG:176_59_8	-0.722022	6.08297e-06	0.00709475	BMI, Age, gender, usual stool type
Diseases	Hypertensive heart disease (I11)	k__Bacteria;p__Bacteroidetes;c__Bacteroidia;o__Bacteroidales;f__Prevotellaceae;g__Prevotella;s__Prevotella sp. MSX73	0.423191	6.16771e-06	0.00721781	BMI, Age, gender, usual stool type
Diseases	Hypertensive heart disease (I11)	k__Bacteria;p__Proteobacteria;c__Betaproteobacteria;o__Burkholderiales;f__Oxalobacteraceae;g__Unclassified;s__Oxalobacteraceae bacterium IMCC9480	0.36772	6.66193e-06	0.00777864	BMI, Age, gender, usual stool type
Diseases	Hypertensive heart disease (I11)	k__Bacteria;p__Proteobacteria;c__Betaproteobacteria;o__Burkholderiales;f__Alcaligenaceae;g__Bordetella;s__Bordetella pertussis	0.244825	6.73962e-06	0.00787899	BMI, Age, gender, usual stool type
Diseases	Hypertensive heart disease (I11)	k__Bacteria;p__Bacteroidetes;c__Bacteroidia;o__Bacteroidales;f__Bacteroidaceae;g__Bacteroides;s__Bacteroides fragilis CAG:47	0.439345	7.0011e-06	0.00817847	BMI, Age, gender, usual stool type
Diseases	Hypertensive heart disease (I11)	k__Bacteria;p__Unclassified;c__Unclassified;o__Unclassified;f__Unclassified;g__Unclassified;s__uncultured bacterium	0.297386	7.4496e-06	0.00869319	BMI, Age, gender, usual stool type
Diseases	Hypertensive heart disease (I11)	k__Bacteria;p__Proteobacteria;c__Betaproteobacteria;o__Burkholderiales;f__Comamonadaceae;g__Hydrogenophaga;s__Hydrogenophaga sp. T4	0.254865	8.01995e-06	0.00933084	BMI, Age, gender, usual stool type
Diseases	Hypertensive heart disease (I11)	k__Bacteria;p__Bacteroidetes;c__Bacteroidia;o__Bacteroidales;f__Bacteroidaceae;g__Bacteroides;s__Bacteroides xylanisolvens	0.370151	8.47027e-06	0.00985489	BMI, Age, gender, usual stool type
Diseases	Hypertensive heart disease (I11)	k__Bacteria;p__Bacteroidetes;c__Bacteroidia;o__Bacteroidales;f__Bacteroidaceae;g__Bacteroides;s__Bacteroides uniformis	0.50772	8.57537e-06	0.00997408	BMI, Age, gender, usual stool type
Diseases	Hypertensive heart disease (I11)	k__Bacteria;p__Bacteroidetes;c__Bacteroidia;o__Bacteroidales;f__Bacteroidaceae;g__Bacteroides;s__Bacteroides sp. D22	0.557888	9.59007e-06	0.0111158	BMI, Age, gender, usual stool type
Diseases	Hypertensive heart disease (I11)	k__Bacteria;p__Bacteroidetes;c__Bacteroidia;o__Bacteroidales;f__Bacteroidaceae;g__Bacteroides;s__Bacteroides dorei	0.519079	9.79226e-06	0.011352	BMI, Age, gender, usual stool type
Diseases	Hypertensive heart disease (I11)	k__Bacteria;p__Bacteroidetes;c__Bacteroidia;o__Bacteroidales;f__Bacteroidaceae;g__Bacteroides;s__Bacteroides sp. 2_1_22	0.517375	1.01286e-05	0.0117249	BMI, Age, gender, usual stool type
Diseases	Hypertensive heart disease (I11)	k__Bacteria;p__Actinobacteria;c__Actinobacteria;o__Corynebacteriales;f__Mycobacteriaceae;g__Mycobacteroides;s__Mycobacteroides abscessus	0.197895	1.07197e-05	0.0123937	BMI, Age, gender, usual stool type
Diseases	Hypertensive heart disease (I11)	k__Bacteria;p__Bacteroidetes;c__Bacteroidia;o__Bacteroidales;f__Bacteroidaceae;g__Bacteroides;s__Bacteroides sp. 1_1_14	0.563624	1.08986e-05	0.0125937	BMI, Age, gender, usual stool type
Diseases	Hypertensive heart disease (I11)	k__Bacteria;p__Bacteroidetes;c__Bacteroidia;o__Bacteroidales;f__Bacteroidaceae;g__Bacteroides;s__Bacteroides sp. 1_1_30	0.505143	1.09099e-05	0.0126064	BMI, Age, gender, usual stool type
Diseases	Hypertensive heart disease (I11)	k__Bacteria;p__Bacteroidetes;c__Bacteroidia;o__Bacteroidales;f__Odoribacteraceae;g__Odoribacter;s__Odoribacter splanchnicus CAG:14	0.362196	1.11409e-05	0.0128674	BMI, Age, gender, usual stool type
Diseases	Hypertensive heart disease (I11)	k__Bacteria;p__Proteobacteria;c__Gammaproteobacteria;o__Enterobacterales;f__Enterobacteriaceae;g__Klebsiella;s__Klebsiella oxytoca	0.227759	1.1432e-05	0.013185	BMI, Age, gender, usual stool type
Diseases	Hypertensive heart disease (I11)	k__Bacteria;p__Bacteroidetes;c__Bacteroidia;o__Bacteroidales;f__Tannerellaceae;g__Parabacteroides;s__Parabacteroides distasonis	0.412415	1.14846e-05	0.0132576	BMI, Age, gender, usual stool type
Diseases	Hypertensive heart disease (I11)	k__Eukaryota;p__Streptophyta;c__Liliopsida;o__Poales;f__Poaceae;g__Zea;s__Zea mays	0.255904	1.19178e-05	0.0137235	BMI, Age, gender, usual stool type
Diseases	Hypertensive heart disease (I11)	k__Bacteria;p__Bacteroidetes;c__Bacteroidia;o__Bacteroidales;f__Bacteroidaceae;g__Bacteroides;s__Bacteroides faecis CAG:32	0.442185	1.22851e-05	0.0141539	BMI, Age, gender, usual stool type
Diseases	Hypertensive heart disease (I11)	k__Bacteria;p__Proteobacteria;c__Gammaproteobacteria;o__Enterobacterales;f__Enterobacteriaceae;g__Klebsiella;s__Klebsiella pneumoniae	0.429612	1.27243e-05	0.0146454	BMI, Age, gender, usual stool type
Diseases	Hypertensive heart disease (I11)	k__Bacteria;p__Bacteroidetes;c__Bacteroidia;o__Bacteroidales;f__Porphyromonadaceae;g__Unclassified;s__Porphyromonadaceae bacterium KA00676	0.431178	1.32143e-05	0.0151872	BMI, Age, gender, usual stool type
Diseases	Hypertensive heart disease (I11)	k__Bacteria;p__Firmicutes;c__Clostridia;o__Clostridiales;f__Lachnospiraceae;g__Lachnoclostridium;s__[Clostridium] bolteae	0.238598	1.3837e-05	0.0158895	BMI, Age, gender, usual stool type
Diseases	Hypertensive heart disease (I11)	k__Bacteria;p__Bacteroidetes;c__Bacteroidia;o__Bacteroidales;f__Bacteroidaceae;g__Bacteroides;s__Bacteroides sp. AM56-10ce	0.644113	1.39895e-05	0.0160462	BMI, Age, gender, usual stool type
Diseases	Hypertensive heart disease (I11)	k__Bacteria;p__Bacteroidetes;c__Bacteroidia;o__Bacteroidales;f__Bacteroidaceae;g__Bacteroides;s__Bacteroides sp. AR20	0.650259	1.41785e-05	0.0161541	BMI, Age, gender, usual stool type
Diseases	Hypertensive heart disease (I11)	k__Bacteria;p__Bacteroidetes;c__Bacteroidia;o__Bacteroidales;f__Rikenellaceae;g__Alistipes;s__Alistipes sp. CAG:29	0.457361	1.45721e-05	0.0167168	BMI, Age, gender, usual stool type
Diseases	Hypertensive heart disease (I11)	k__Bacteria;p__Bacteroidetes;c__Bacteroidia;o__Bacteroidales;f__Bacteroidaceae;g__Bacteroides;s__Bacteroides sp. 3_1_23	0.441099	1.48592e-05	0.0170397	BMI, Age, gender, usual stool type
Diseases	Hypertensive heart disease (I11)	k__Bacteria;p__Bacteroidetes;c__Bacteroidia;o__Bacteroidales;f__Bacteroidaceae;g__Bacteroides;s__Bacteroides sp. 2_2_4	0.510643	1.6136e-05	0.0184697	BMI, Age, gender, usual stool type
Diseases	Hypertensive heart disease (I11)	k__Bacteria;p__Bacteroidetes;c__Bacteroidia;o__Bacteroidales;f__Bacteroidaceae;g__Bacteroides;s__Bacteroides cellulosilyticus CAG:158	0.408886	1.62436e-05	0.0185887	BMI, Age, gender, usual stool type
Diseases	Hypertensive heart disease (I11)	k__Bacteria;p__Bacteroidetes;c__Bacteroidia;o__Bacteroidales;f__Bacteroidaceae;g__Bacteroides;s__Bacteroides vulgatus	0.498465	1.76129e-05	0.0201202	BMI, Age, gender, usual stool type
Diseases	Hypertensive heart disease (I11)	k__Bacteria;p__Bacteroidetes;c__Bacteroidia;o__Bacteroidales;f__Porphyromonadaceae;g__Porphyromonas;s__Porphyromonas gingivalis	0.327529	1.77037e-05	0.0202178	BMI, Age, gender, usual stool type
Diseases	Hypertensive heart disease (I11)	k__Bacteria;p__Bacteroidetes;c__Bacteroidia;o__Bacteroidales;f__Bacteroidaceae;g__Bacteroides;s__Bacteroides sartorii	0.483184	1.94355e-05	0.0221584	BMI, Age, gender, usual stool type
Diseases	Hypertensive heart disease (I11)	k__Bacteria;p__Firmicutes;c__Clostridia;o__Clostridiales;f__Clostridiaceae;g__Clostridium;s__Clostridium sp. CAG:307_30_263	-0.960366	2.24142e-05	0.025376	BMI, Age, gender, usual stool type
Diseases	Hypertensive heart disease (I11)	k__Bacteria;p__Bacteroidetes;c__Bacteroidia;o__Bacteroidales;f__Bacteroidaceae;g__Bacteroides;s__Bacteroides fragilis CAG:558	0.389706	2.41036e-05	0.0273609	BMI, Age, gender, usual stool type
Diseases	Hypertensive heart disease (I11)	k__Bacteria;p__Firmicutes;c__Clostridia;o__Clostridiales;f__Ruminococcaceae;g__Ruminococcus;s__Ruminococcus sp. CAG:60	0.23879	2.49444e-05	0.0282628	BMI, Age, gender, usual stool type
Diseases	Hypertensive heart disease (I11)	k__Bacteria;p__Bacteroidetes;c__Bacteroidia;o__Bacteroidales;f__Rikenellaceae;g__Alistipes;s__Alistipes finegoldii CAG:68	0.327869	2.4922e-05	0.0282744	BMI, Age, gender, usual stool type
Diseases	Hypertensive heart disease (I11)	k__Bacteria;p__Firmicutes;c__Clostridia;o__Clostridiales;f__Clostridiaceae;g__Clostridium;s__Clostridium sp. KLE 1755	0.210453	2.54739e-05	0.028801	BMI, Age, gender, usual stool type
Diseases	Hypertensive heart disease (I11)	k__Bacteria;p__Proteobacteria;c__Gammaproteobacteria;o__Enterobacterales;f__Enterobacteriaceae;g__Escherichia;s__Escherichia coli	0.495304	2.59117e-05	0.0293641	BMI, Age, gender, usual stool type
Diseases	Hypertensive heart disease (I11)	k__Bacteria;p__Proteobacteria;c__Alphaproteobacteria;o__Rhizobiales;f__Rhizobiaceae;g__Rhizobium;s__Rhizobium etli	0.184302	2.604e-05	0.0294696	BMI, Age, gender, usual stool type
Diseases	Hypertensive heart disease (I11)	k__Bacteria;p__Firmicutes;c__Clostridia;o__Clostridiales;f__Lachnospiraceae;g__Blautia;s__Blautia sp. CAG:37	0.222911	2.72739e-05	0.0308396	BMI, Age, gender, usual stool type
Diseases	Hypertensive heart disease (I11)	k__Bacteria;p__Proteobacteria;c__Gammaproteobacteria;o__Enterobacterales;f__Enterobacteriaceae;g__Citrobacter;s__Citrobacter koseri	0.352108	2.73868e-05	0.0309027	BMI, Age, gender, usual stool type
Diseases	Hypertensive heart disease (I11)	k__Bacteria;p__Proteobacteria;c__Gammaproteobacteria;o__Pseudomonadales;f__Pseudomonadaceae;g__Pseudomonas;s__Pseudomonas syringae group genomosp. 3	0.251647	2.86505e-05	0.0323526	BMI, Age, gender, usual stool type
Diseases	Hypertensive heart disease (I11)	k__Bacteria;p__Bacteroidetes;c__Bacteroidia;o__Bacteroidales;f__Bacteroidaceae;g__Bacteroides;s__Bacteroides ovatus CAG:22	0.411173	3.01784e-05	0.0340518	BMI, Age, gender, usual stool type
Diseases	Hypertensive heart disease (I11)	k__Bacteria;p__Bacteroidetes;c__Bacteroidia;o__Bacteroidales;f__Bacteroidaceae;g__Bacteroides;s__Bacteroides dorei CAG:222	0.432395	3.04288e-05	0.0343109	BMI, Age, gender, usual stool type
Diseases	Hypertensive heart disease (I11)	k__Bacteria;p__Proteobacteria;c__Alphaproteobacteria;o__Rhodospirillales;f__Rhodospirillaceae;g__Nitrospirillum;s__Nitrospirillum amazonense	0.225431	3.11693e-05	0.0351081	BMI, Age, gender, usual stool type
Diseases	Hypertensive heart disease (I11)	k__Bacteria;p__Actinobacteria;c__Coriobacteriia;o__Eggerthellales;f__Eggerthellaceae;g__Eggerthella;s__Eggerthella sp. CAG:1427	0.197362	3.20806e-05	0.0361279	BMI, Age, gender, usual stool type
Diseases	Hypertensive heart disease (I11)	k__Bacteria;p__Bacteroidetes;c__Bacteroidia;o__Bacteroidales;f__Bacteroidaceae;g__Bacteroides;s__Bacteroides sp. 3_1_40A	0.50512	3.2277e-05	0.0363488	BMI, Age, gender, usual stool type
Diseases	Hypertensive heart disease (I11)	k__Bacteria;p__Firmicutes;c__Clostridia;o__Clostridiales;f__Ruminococcaceae;g__Ruminococcus;s__Ruminococcus sp. CAG:353	-0.743542	3.54632e-05	0.0397863	BMI, Age, gender, usual stool type
Diseases	Hypertensive heart disease (I11)	k__Bacteria;p__Bacteroidetes;c__Bacteroidia;o__Bacteroidales;f__Bacteroidaceae;g__Bacteroides;s__Bacteroides sp. CAG:633	0.353138	3.96147e-05	0.0443419	BMI, Age, gender, usual stool type
Diseases	Hypertensive heart disease (I11)	k__Bacteria;p__Bacteroidetes;c__Bacteroidia;o__Bacteroidales;f__Bacteroidaceae;g__Bacteroides;s__Bacteroides sp. CAG:702	0.372398	4.08626e-05	0.0456837	BMI, Age, gender, usual stool type
Diseases	Hypertensive heart disease (I11)	k__Bacteria;p__Proteobacteria;c__Gammaproteobacteria;o__Xanthomonadales;f__Xanthomonadaceae;g__Xanthomonas;s__Xanthomonas citri	0.194693	4.20431e-05	0.0469108	BMI, Age, gender, usual stool type
Diseases	Hypertensive heart disease (I11)	k__Bacteria;p__Firmicutes;c__Clostridia;o__Clostridiales;f__Clostridiaceae;g__Clostridium;s__Clostridium sp. CAG:43	0.25465	4.24748e-05	0.0473923	BMI, Age, gender, usual stool type
Diseases	Hypertensive heart disease (I11)	k__Bacteria;p__Bacteroidetes;c__Bacteroidia;o__Bacteroidales;f__Bacteroidaceae;g__Bacteroides;s__Bacteroides ovatus	0.453983	4.26088e-05	0.0475579	BMI, Age, gender, usual stool type
Diseases	Hypertensive heart disease (I11)	k__Bacteria;p__Proteobacteria;c__Betaproteobacteria;o__Burkholderiales;f__Burkholderiaceae;g__Burkholderia;s__Burkholderia pseudomallei	0.206901	4.41302e-05	0.0491803	BMI, Age, gender, usual stool type
Diseases	Hypertensive heart disease (I11)	k__Bacteria;p__Bacteroidetes;c__Bacteroidia;o__Bacteroidales;f__Bacteroidaceae;g__Bacteroides;s__Bacteroides sp. AR29	0.609877	4.43953e-05	0.0494571	BMI, Age, gender, usual stool type
Diseases	Hypertensive heart disease (I11)	k__Bacteria;p__Firmicutes;c__Bacilli;o__Bacillales;f__Paenibacillaceae;g__Paenibacillus;s__Paenibacillus sp. P22	0.151138	4.48246e-05	0.0499131	BMI, Age, gender, usual stool type
Diseases	Hypertensive heart disease (I11)	k__Bacteria;p__Proteobacteria;c__Gammaproteobacteria;o__Enterobacterales;f__Enterobacteriaceae;g__Enterobacter;s__Enterobacter ludwigii	0.394633	5.47601e-08	6.73782e-05	BMI, Age, gender, usual stool type, history of antibiotic usage
Diseases	Hypertensive heart disease (I11)	k__Bacteria;p__Proteobacteria;c__Gammaproteobacteria;o__Pseudomonadales;f__Pseudomonadaceae;g__Pseudomonas;s__Pseudomonas putida	0.302897	5.60249e-08	6.89308e-05	BMI, Age, gender, usual stool type, history of antibiotic usage
Diseases	Hypertensive heart disease (I11)	k__Eukaryota;p__Ascomycota;c__Sordariomycetes;o__Hypocreales;f__Cordycipitaceae;g__Beauveria;s__Beauveria bassiana	0.244215	3.50607e-07	0.000430208	BMI, Age, gender, usual stool type, history of antibiotic usage
Diseases	Hypertensive heart disease (I11)	k__Bacteria;p__Proteobacteria;c__Gammaproteobacteria;o__Oceanospirillales;f__Halomonadaceae;g__Zymobacter;s__Zymobacter palmae	0.333557	3.51932e-07	0.000431915	BMI, Age, gender, usual stool type, history of antibiotic usage
Diseases	Hypertensive heart disease (I11)	k__Bacteria;p__Proteobacteria;c__Gammaproteobacteria;o__Enterobacterales;f__Enterobacteriaceae;g__Shigella;s__Shigella flexneri	0.512507	3.65398e-07	0.000448355	BMI, Age, gender, usual stool type, history of antibiotic usage
Diseases	Hypertensive heart disease (I11)	k__Bacteria;p__Bacteroidetes;c__Cytophagia;o__Cytophagales;f__Flammeovirgaceae;g__Cesiribacter;s__Cesiribacter andamanensis	0.404043	3.84828e-07	0.000472041	BMI, Age, gender, usual stool type, history of antibiotic usage
Diseases	Hypertensive heart disease (I11)	k__Bacteria;p__Proteobacteria;c__Gammaproteobacteria;o__Enterobacterales;f__Enterobacteriaceae;g__Enterobacter;s__Enterobacter cloacae	0.270194	5.18285e-07	0.000634929	BMI, Age, gender, usual stool type, history of antibiotic usage
Diseases	Hypertensive heart disease (I11)	k__Bacteria;p__Proteobacteria;c__Betaproteobacteria;o__Burkholderiales;f__Burkholderiaceae;g__Ralstonia;s__Ralstonia solanacearum	0.264887	8.26521e-07	0.00101078	BMI, Age, gender, usual stool type, history of antibiotic usage
Diseases	Hypertensive heart disease (I11)	k__Bacteria;p__Proteobacteria;c__Gammaproteobacteria;o__Xanthomonadales;f__Xanthomonadaceae;g__Xanthomonas;s__Xanthomonas phaseoli	0.29194	9.0085e-07	0.00110138	BMI, Age, gender, usual stool type, history of antibiotic usage
Diseases	Hypertensive heart disease (I11)	k__Bacteria;p__Proteobacteria;c__Gammaproteobacteria;o__Enterobacterales;f__Enterobacteriaceae;g__Salmonella;s__Salmonella enterica	0.322609	1.19482e-06	0.00145957	BMI, Age, gender, usual stool type, history of antibiotic usage
Diseases	Hypertensive heart disease (I11)	k__Bacteria;p__Proteobacteria;c__Gammaproteobacteria;o__Pseudomonadales;f__Pseudomonadaceae;g__Pseudomonas;s__Pseudomonas amygdali	0.290411	1.34104e-06	0.00163668	BMI, Age, gender, usual stool type, history of antibiotic usage
Diseases	Hypertensive heart disease (I11)	k__Bacteria;p__Cyanobacteria;c__Unclassified;o__Nostocales;f__Tolypothrichaceae;g__Tolypothrix;s__Tolypothrix campylonemoides	0.247582	1.4073e-06	0.00171695	BMI, Age, gender, usual stool type, history of antibiotic usage
Diseases	Hypertensive heart disease (I11)	k__Bacteria;p__Bacteroidetes;c__Bacteroidia;o__Bacteroidales;f__Bacteroidaceae;g__Bacteroides;s__Bacteroides thetaiotaomicron	0.511421	1.43916e-06	0.00175559	BMI, Age, gender, usual stool type, history of antibiotic usage
Diseases	Hypertensive heart disease (I11)	k__Bacteria;p__Bacteroidetes;c__Bacteroidia;o__Bacteroidales;f__Bacteroidaceae;g__Bacteroides;s__Bacteroides intestinalis CAG:564	0.456539	2.4148e-06	0.00293911	BMI, Age, gender, usual stool type, history of antibiotic usage
Diseases	Hypertensive heart disease (I11)	k__Bacteria;p__Proteobacteria;c__Gammaproteobacteria;o__Enterobacterales;f__Enterobacteriaceae;g__Shigella;s__Shigella sonnei	0.4072	2.58619e-06	0.00314654	BMI, Age, gender, usual stool type, history of antibiotic usage
Diseases	Hypertensive heart disease (I11)	k__Bacteria;p__Proteobacteria;c__Betaproteobacteria;o__Burkholderiales;f__Burkholderiaceae;g__Cupriavidus;s__Cupriavidus taiwanensis	0.230067	2.98435e-06	0.00362754	BMI, Age, gender, usual stool type, history of antibiotic usage
Diseases	Hypertensive heart disease (I11)	k__Bacteria;p__Actinobacteria;c__Actinobacteria;o__Micrococcales;f__Micrococcaceae;g__Rothia;s__Rothia mucilaginosa	0.231417	3.82188e-06	0.00463779	BMI, Age, gender, usual stool type, history of antibiotic usage
Diseases	Hypertensive heart disease (I11)	k__Bacteria;p__Bacteroidetes;c__Bacteroidia;o__Bacteroidales;f__Bacteroidaceae;g__Bacteroides;s__Bacteroides thetaiotaomicron CAG:40	0.484407	4.18287e-06	0.00507236	BMI, Age, gender, usual stool type, history of antibiotic usage
Diseases	Hypertensive heart disease (I11)	k__Bacteria;p__Proteobacteria;c__Gammaproteobacteria;o__Enterobacterales;f__Enterobacteriaceae;g__Cronobacter;s__Cronobacter sakazakii	0.256039	4.52256e-06	0.00547994	BMI, Age, gender, usual stool type, history of antibiotic usage
Diseases	Hypertensive heart disease (I11)	k__Eukaryota;p__Streptophyta;c__Unclassified;o__Malpighiales;f__Euphorbiaceae;g__Ricinus;s__Ricinus communis	0.307855	4.83033e-06	0.00583925	BMI, Age, gender, usual stool type, history of antibiotic usage
Diseases	Hypertensive heart disease (I11)	k__Bacteria;p__Proteobacteria;c__Gammaproteobacteria;o__Pseudomonadales;f__Moraxellaceae;g__Acinetobacter;s__Acinetobacter baumannii	0.261436	5.30749e-06	0.00642324	BMI, Age, gender, usual stool type, history of antibiotic usage
Diseases	Hypertensive heart disease (I11)	k__Eukaryota;p__Arthropoda;c__Arachnida;o__Araneae;f__Araneidae;g__Nephila;s__Nephila clavipes	0.21976	6.51334e-06	0.00786257	BMI, Age, gender, usual stool type, history of antibiotic usage
Diseases	Hypertensive heart disease (I11)	k__Bacteria;p__Proteobacteria;c__Gammaproteobacteria;o__Enterobacterales;f__Yersiniaceae;g__Serratia;s__Serratia marcescens	0.226224	6.99312e-06	0.00843828	BMI, Age, gender, usual stool type, history of antibiotic usage
Diseases	Hypertensive heart disease (I11)	k__Bacteria;p__Bacteroidetes;c__Bacteroidia;o__Bacteroidales;f__Bacteroidaceae;g__Bacteroides;s__Bacteroides intestinalis CAG:315	0.458187	7.69953e-06	0.00928681	BMI, Age, gender, usual stool type, history of antibiotic usage
Diseases	Hypertensive heart disease (I11)	k__Bacteria;p__Firmicutes;c__Unclassified;o__Unclassified;f__Unclassified;g__Unclassified;s__Firmicutes bacterium CAG:345	-1.11569	7.91534e-06	0.00947799	BMI, Age, gender, usual stool type, history of antibiotic usage
Diseases	Hypertensive heart disease (I11)	k__Bacteria;p__Bacteroidetes;c__Bacteroidia;o__Bacteroidales;f__Bacteroidaceae;g__Bacteroides;s__Bacteroides fragilis	0.44089	7.92194e-06	0.0095512	BMI, Age, gender, usual stool type, history of antibiotic usage
Diseases	Hypertensive heart disease (I11)	k__Bacteria;p__Bacteroidetes;c__Bacteroidia;o__Bacteroidales;f__Rikenellaceae;g__Alistipes;s__Alistipes sp. CAG:157	0.36802	8.19426e-06	0.00987309	BMI, Age, gender, usual stool type, history of antibiotic usage
Diseases	Hypertensive heart disease (I11)	k__Bacteria;p__Bacteroidetes;c__Bacteroidia;o__Bacteroidales;f__Unclassified;g__Unclassified;s__Bacteroidales bacterium Barb6	0.369917	9.91225e-06	0.0119061	BMI, Age, gender, usual stool type, history of antibiotic usage
Diseases	Hypertensive heart disease (I11)	k__Bacteria;p__Firmicutes;c__Bacilli;o__Lactobacillales;f__Streptococcaceae;g__Streptococcus;s__Streptococcus pneumoniae	0.188638	9.96462e-06	0.0119619	BMI, Age, gender, usual stool type, history of antibiotic usage
Diseases	Hypertensive heart disease (I11)	k__Bacteria;p__Bacteroidetes;c__Bacteroidia;o__Bacteroidales;f__Bacteroidaceae;g__Bacteroides;s__Bacteroides sp. CAG:189	0.431166	1.12557e-05	0.0134797	BMI, Age, gender, usual stool type, history of antibiotic usage
Diseases	Hypertensive heart disease (I11)	k__Bacteria;p__Proteobacteria;c__Betaproteobacteria;o__Neisseriales;f__Neisseriaceae;g__Neisseria;s__Neisseria meningitidis	0.225578	1.15244e-05	0.0137883	BMI, Age, gender, usual stool type, history of antibiotic usage
Diseases	Hypertensive heart disease (I11)	k__Bacteria;p__Tenericutes;c__Mollicutes;o__Mycoplasmatales;f__Mycoplasmataceae;g__Mycoplasma;s__Mycoplasma sp. CAG:956	-1.04926	1.2394e-05	0.0145772	BMI, Age, gender, usual stool type, history of antibiotic usage
Diseases	Hypertensive heart disease (I11)	k__Bacteria;p__Unclassified;c__Unclassified;o__Unclassified;f__Unclassified;g__Unclassified;s__uncultured bacterium MedeBAC46A06	0.519046	1.27126e-05	0.0151636	BMI, Age, gender, usual stool type, history of antibiotic usage
Diseases	Hypertensive heart disease (I11)	k__Bacteria;p__Proteobacteria;c__Betaproteobacteria;o__Burkholderiales;f__Alcaligenaceae;g__Achromobacter;s__Achromobacter xylosoxidans	0.262622	1.2989e-05	0.0154929	BMI, Age, gender, usual stool type, history of antibiotic usage
Diseases	Hypertensive heart disease (I11)	k__Bacteria;p__Bacteroidetes;c__Bacteroidia;o__Bacteroidales;f__Unclassified;g__Unclassified;s__Bacteroidales bacterium Barb7	0.348435	1.3264e-05	0.0158356	BMI, Age, gender, usual stool type, history of antibiotic usage
Diseases	Hypertensive heart disease (I11)	k__Bacteria;p__Bacteroidetes;c__Bacteroidia;o__Bacteroidales;f__Bacteroidaceae;g__Bacteroides;s__Bacteroides nordii	0.395571	1.34268e-05	0.016018	BMI, Age, gender, usual stool type, history of antibiotic usage
Diseases	Hypertensive heart disease (I11)	k__Bacteria;p__Proteobacteria;c__Gammaproteobacteria;o__Enterobacterales;f__Enterobacteriaceae;g__Cronobacter;s__Cronobacter universalis	0.339104	1.34861e-05	0.0160574	BMI, Age, gender, usual stool type, history of antibiotic usage
Diseases	Hypertensive heart disease (I11)	k__Bacteria;p__Proteobacteria;c__Gammaproteobacteria;o__Pseudomonadales;f__Pseudomonadaceae;g__Pseudomonas;s__Pseudomonas aeruginosa	0.192587	1.35579e-05	0.0161714	BMI, Age, gender, usual stool type, history of antibiotic usage
Diseases	Hypertensive heart disease (I11)	k__Bacteria;p__Bacteroidetes;c__Bacteroidia;o__Bacteroidales;f__Bacteroidaceae;g__Bacteroides;s__Bacteroides sp. D1	0.507562	1.37078e-05	0.0163135	BMI, Age, gender, usual stool type, history of antibiotic usage
Diseases	Hypertensive heart disease (I11)	k__Bacteria;p__Bacteroidetes;c__Bacteroidia;o__Bacteroidales;f__Porphyromonadaceae;g__Porphyromonas;s__Porphyromonas crevioricanis	0.424245	1.39435e-05	0.0166027	BMI, Age, gender, usual stool type, history of antibiotic usage
Diseases	Hypertensive heart disease (I11)	k__Bacteria;p__Bacteroidetes;c__Bacteroidia;o__Bacteroidales;f__Bacteroidaceae;g__Bacteroides;s__Bacteroides sp. AM54-2NS	0.584198	1.41537e-05	0.0168167	BMI, Age, gender, usual stool type, history of antibiotic usage
Diseases	Hypertensive heart disease (I11)	k__Bacteria;p__Proteobacteria;c__Alphaproteobacteria;o__Rhizobiales;f__Rhizobiaceae;g__Rhizobium;s__Rhizobium freirei	0.236004	1.43071e-05	0.0170334	BMI, Age, gender, usual stool type, history of antibiotic usage
Diseases	Hypertensive heart disease (I11)	k__Bacteria;p__Proteobacteria;c__Gammaproteobacteria;o__Pseudomonadales;f__Pseudomonadaceae;g__Pseudomonas;s__Pseudomonas syringae	0.197575	1.55914e-05	0.0185105	BMI, Age, gender, usual stool type, history of antibiotic usage
Diseases	Hypertensive heart disease (I11)	k__Bacteria;p__Proteobacteria;c__Betaproteobacteria;o__Burkholderiales;f__Oxalobacteraceae;g__Unclassified;s__Oxalobacteraceae bacterium IMCC9480	0.35205	1.59986e-05	0.0189675	BMI, Age, gender, usual stool type, history of antibiotic usage
Diseases	Hypertensive heart disease (I11)	k__Bacteria;p__Bacteroidetes;c__Bacteroidia;o__Bacteroidales;f__Unclassified;g__Unclassified;s__Bacteroidales bacterium Barb4	0.345674	1.60942e-05	0.0191083	BMI, Age, gender, usual stool type, history of antibiotic usage
Diseases	Hypertensive heart disease (I11)	k__Bacteria;p__Actinobacteria;c__Actinobacteria;o__Corynebacteriales;f__Mycobacteriaceae;g__Mycobacterium;s__Mycobacterium tuberculosis	0.186792	1.62037e-05	0.0192169	BMI, Age, gender, usual stool type, history of antibiotic usage
Diseases	Hypertensive heart disease (I11)	k__Bacteria;p__Bacteroidetes;c__Bacteroidia;o__Bacteroidales;f__Bacteroidaceae;g__Bacteroides;s__Bacteroides caccae CAG:21	0.392568	1.64589e-05	0.0195279	BMI, Age, gender, usual stool type, history of antibiotic usage
Diseases	Hypertensive heart disease (I11)	k__Bacteria;p__Proteobacteria;c__Gammaproteobacteria;o__Vibrionales;f__Vibrionaceae;g__Vibrio;s__Vibrio cholerae	0.271683	1.72363e-05	0.0204053	BMI, Age, gender, usual stool type, history of antibiotic usage
Diseases	Hypertensive heart disease (I11)	k__Bacteria;p__Bacteroidetes;c__Bacteroidia;o__Bacteroidales;f__Prevotellaceae;g__Prevotella;s__Prevotella sp. MSX73	0.401136	1.76192e-05	0.0208416	BMI, Age, gender, usual stool type, history of antibiotic usage
Diseases	Hypertensive heart disease (I11)	k__Bacteria;p__Bacteroidetes;c__Bacteroidia;o__Bacteroidales;f__Bacteroidaceae;g__Bacteroides;s__Bacteroides uniformis CAG:3	0.450984	1.77375e-05	0.0209983	BMI, Age, gender, usual stool type, history of antibiotic usage
Diseases	Hypertensive heart disease (I11)	k__Bacteria;p__Bacteroidetes;c__Bacteroidia;o__Bacteroidales;f__Tannerellaceae;g__Parabacteroides;s__Parabacteroides johnsonii CAG:246	0.357185	1.81365e-05	0.0214521	BMI, Age, gender, usual stool type, history of antibiotic usage
Diseases	Hypertensive heart disease (I11)	k__Bacteria;p__Bacteroidetes;c__Bacteroidia;o__Bacteroidales;f__Tannerellaceae;g__Parabacteroides;s__Parabacteroides merdae CAG:48	0.355305	1.97309e-05	0.0232717	BMI, Age, gender, usual stool type, history of antibiotic usage
Diseases	Hypertensive heart disease (I11)	k__Bacteria;p__Bacteroidetes;c__Bacteroidia;o__Bacteroidales;f__Bacteroidaceae;g__Bacteroides;s__Bacteroides clarus CAG:160	0.396183	1.9943e-05	0.0235139	BMI, Age, gender, usual stool type, history of antibiotic usage
Diseases	Hypertensive heart disease (I11)	k__Bacteria;p__Bacteroidetes;c__Bacteroidia;o__Bacteroidales;f__Bacteroidaceae;g__Bacteroides;s__Bacteroides stercoris CAG:120	0.405947	2.07586e-05	0.0244434	BMI, Age, gender, usual stool type, history of antibiotic usage
Diseases	Hypertensive heart disease (I11)	k__Bacteria;p__Bacteroidetes;c__Bacteroidia;o__Bacteroidales;f__Bacteroidaceae;g__Bacteroides;s__Bacteroides fluxus	0.400649	2.11204e-05	0.0248596	BMI, Age, gender, usual stool type, history of antibiotic usage
Diseases	Hypertensive heart disease (I11)	k__Bacteria;p__Proteobacteria;c__Gammaproteobacteria;o__Chromatiales;f__Chromatiaceae;g__Thiocapsa;s__Thiocapsa sp. KS1	0.235256	2.38427e-05	0.0279807	BMI, Age, gender, usual stool type, history of antibiotic usage
Diseases	Hypertensive heart disease (I11)	k__Bacteria;p__Bacteroidetes;c__Bacteroidia;o__Bacteroidales;f__Bacteroidaceae;g__Bacteroides;s__Bacteroides finegoldii CAG:203	0.391593	2.3986e-05	0.0281356	BMI, Age, gender, usual stool type, history of antibiotic usage
Diseases	Hypertensive heart disease (I11)	k__Bacteria;p__Firmicutes;c__Unclassified;o__Unclassified;f__Unclassified;g__Unclassified;s__Firmicutes bacterium CAG:176_59_8	-0.668257	2.54091e-05	0.0296745	BMI, Age, gender, usual stool type, history of antibiotic usage
Diseases	Hypertensive heart disease (I11)	k__Bacteria;p__Bacteroidetes;c__Bacteroidia;o__Bacteroidales;f__Unclassified;g__Unclassified;s__Bacteroidales bacterium Barb6XT	0.362891	2.53816e-05	0.0297367	BMI, Age, gender, usual stool type, history of antibiotic usage
Diseases	Hypertensive heart disease (I11)	k__Bacteria;p__Firmicutes;c__Clostridia;o__Clostridiales;f__Lachnospiraceae;g__Lachnoclostridium;s__[Clostridium] clostridioforme	0.256385	2.54791e-05	0.0298505	BMI, Age, gender, usual stool type, history of antibiotic usage
Diseases	Hypertensive heart disease (I11)	k__Bacteria;p__Bacteroidetes;c__Bacteroidia;o__Bacteroidales;f__Bacteroidaceae;g__Bacteroides;s__Bacteroides eggerthii CAG:109	0.376613	2.60477e-05	0.0304978	BMI, Age, gender, usual stool type, history of antibiotic usage
Diseases	Hypertensive heart disease (I11)	k__Bacteria;p__Proteobacteria;c__Betaproteobacteria;o__Burkholderiales;f__Alcaligenaceae;g__Bordetella;s__Bordetella pertussis	0.226925	2.72852e-05	0.031912	BMI, Age, gender, usual stool type, history of antibiotic usage
Diseases	Hypertensive heart disease (I11)	k__Bacteria;p__Proteobacteria;c__Betaproteobacteria;o__Burkholderiales;f__Comamonadaceae;g__Hydrogenophaga;s__Hydrogenophaga sp. T4	0.238193	2.8086e-05	0.0328342	BMI, Age, gender, usual stool type, history of antibiotic usage
Diseases	Hypertensive heart disease (I11)	k__Bacteria;p__Proteobacteria;c__Gammaproteobacteria;o__Enterobacterales;f__Enterobacteriaceae;g__Klebsiella;s__Klebsiella oxytoca	0.21618	3.03632e-05	0.035432	BMI, Age, gender, usual stool type, history of antibiotic usage
Diseases	Hypertensive heart disease (I11)	k__Bacteria;p__Proteobacteria;c__Gammaproteobacteria;o__Enterobacterales;f__Enterobacteriaceae;g__Cronobacter;s__Cronobacter dublinensis	0.294507	3.06549e-05	0.0357833	BMI, Age, gender, usual stool type, history of antibiotic usage
Diseases	Hypertensive heart disease (I11)	k__Bacteria;p__Bacteroidetes;c__Bacteroidia;o__Bacteroidales;f__Bacteroidaceae;g__Bacteroides;s__Bacteroides sp. AR20	0.623418	3.14725e-05	0.036446	BMI, Age, gender, usual stool type, history of antibiotic usage
Diseases	Hypertensive heart disease (I11)	k__Bacteria;p__Proteobacteria;c__Gammaproteobacteria;o__Enterobacterales;f__Enterobacteriaceae;g__Klebsiella;s__Klebsiella pneumoniae	0.404399	3.81206e-05	0.0443462	BMI, Age, gender, usual stool type, history of antibiotic usage
Diseases	Hypertensive heart disease (I11)	k__Bacteria;p__Actinobacteria;c__Actinobacteria;o__Corynebacteriales;f__Mycobacteriaceae;g__Mycobacteroides;s__Mycobacteroides abscessus	0.18398	3.93916e-05	0.0457648	BMI, Age, gender, usual stool type, history of antibiotic usage
Diseases	Hypertensive heart disease (I11)	k__Bacteria;p__Bacteroidetes;c__Bacteroidia;o__Bacteroidales;f__Bacteroidaceae;g__Bacteroides;s__Bacteroides fragilis CAG:47	0.396966	4.05432e-05	0.0470611	BMI, Age, gender, usual stool type, history of antibiotic usage
Diseases	Hypertensive heart disease (I11)	k__Bacteria;p__Unclassified;c__Unclassified;o__Unclassified;f__Unclassified;g__Unclassified;s__uncultured bacterium	0.269351	4.14056e-05	0.0480517	BMI, Age, gender, usual stool type, history of antibiotic usage
Diseases	Hypertensive heart disease (I11)	k__Bacteria;p__Bacteroidetes;c__Bacteroidia;o__Bacteroidales;f__Bacteroidaceae;g__Bacteroides;s__Bacteroides xylanisolvens	0.33743	4.23717e-05	0.0491417	BMI, Age, gender, usual stool type, history of antibiotic usage
Diseases	Irritable bowel syndrome (K58)	k__Bacteria;p__Proteobacteria;c__Betaproteobacteria;o__Burkholderiales;f__Burkholderiaceae;g__Ralstonia;s__Ralstonia solanacearum	0.327562	2.78747e-06	0.00343057	BMI, Age, gender, usual stool type
Diseases	Irritable bowel syndrome (K58)	k__Bacteria;p__Actinobacteria;c__Coriobacteriia;o__Eggerthellales;f__Eggerthellaceae;g__Eggerthella;s__Eggerthella sp. CAG:1427	0.275381	7.52415e-06	0.00923874	BMI, Age, gender, usual stool type
Diseases	Irritable bowel syndrome (K58)	k__Bacteria;p__Firmicutes;c__Clostridia;o__Clostridiales;f__Lachnospiraceae;g__Lachnoclostridium;s__[Clostridium] bolteae	0.317529	8.0769e-06	0.00991199	BMI, Age, gender, usual stool type
Diseases	Irritable bowel syndrome (K58)	k__Bacteria;p__Bacteroidetes;c__Bacteroidia;o__Bacteroidales;f__Bacteroidaceae;g__Bacteroides;s__Bacteroides sp. AM54-2NS	0.776348	9.45861e-06	0.0115979	BMI, Age, gender, usual stool type
Diseases	Irritable bowel syndrome (K58)	k__Eukaryota;p__Streptophyta;c__Liliopsida;o__Poales;f__Poaceae;g__Zea;s__Zea mays	0.332915	1.09899e-05	0.0134641	BMI, Age, gender, usual stool type
Diseases	Irritable bowel syndrome (K58)	k__Bacteria;p__Proteobacteria;c__Betaproteobacteria;o__Burkholderiales;f__Burkholderiaceae;g__Burkholderia;s__Burkholderia cenocepacia	0.348029	1.17853e-05	0.0144325	BMI, Age, gender, usual stool type
Diseases	Irritable bowel syndrome (K58)	k__Bacteria;p__Firmicutes;c__Clostridia;o__Clostridiales;f__Clostridiaceae;g__Clostridium;s__Clostridium sp. KLE 1755	0.28366	1.18183e-05	0.0144747	BMI, Age, gender, usual stool type
Diseases	Irritable bowel syndrome (K58)	k__Bacteria;p__Firmicutes;c__Clostridia;o__Clostridiales;f__Clostridiaceae;g__Clostridium;s__Clostridium sp. CAG:568	-1.53467	1.55728e-05	0.0190014	BMI, Age, gender, usual stool type
Diseases	Irritable bowel syndrome (K58)	k__Bacteria;p__Firmicutes;c__Erysipelotrichia;o__Erysipelotrichales;f__Erysipelotrichaceae;g__Coprobacillus;s__Coprobacillus sp. CAG:826	-1.35532	2.10288e-05	0.0255704	BMI, Age, gender, usual stool type
Diseases	Irritable bowel syndrome (K58)	k__Bacteria;p__Bacteroidetes;c__Bacteroidia;o__Bacteroidales;f__Bacteroidaceae;g__Bacteroides;s__Bacteroides xylanisolvens	0.457581	2.17572e-05	0.0265656	BMI, Age, gender, usual stool type
Diseases	Irritable bowel syndrome (K58)	k__Bacteria;p__Bacteroidetes;c__Bacteroidia;o__Bacteroidales;f__Bacteroidaceae;g__Bacteroides;s__Bacteroides sp. D22	0.691706	2.29465e-05	0.027996	BMI, Age, gender, usual stool type
Diseases	Irritable bowel syndrome (K58)	k__Bacteria;p__Bacteroidetes;c__Bacteroidia;o__Bacteroidales;f__Bacteroidaceae;g__Bacteroides;s__Bacteroides sp. 3_1_13	0.728934	2.4512e-05	0.0298858	BMI, Age, gender, usual stool type
Diseases	Irritable bowel syndrome (K58)	k__Bacteria;p__Proteobacteria;c__Gammaproteobacteria;o__Enterobacterales;f__Enterobacteriaceae;g__Cronobacter;s__Cronobacter universalis	0.427665	2.71079e-05	0.0330202	BMI, Age, gender, usual stool type
Diseases	Irritable bowel syndrome (K58)	k__Bacteria;p__Firmicutes;c__Clostridia;o__Clostridiales;f__Lachnospiraceae;g__Lachnoclostridium;s__[Clostridium] clostridioforme	0.332121	3.00772e-05	0.0366115	BMI, Age, gender, usual stool type
Diseases	Irritable bowel syndrome (K58)	k__Bacteria;p__Lentisphaerae;c__Lentisphaeria;o__Victivallales;f__Unclassified;g__Unclassified;s__Victivallales bacterium CCUG 44730	-1.15765	3.81615e-05	0.0463344	BMI, Age, gender, usual stool type
Diseases	Irritable bowel syndrome (K58)	k__Bacteria;p__Firmicutes;c__Clostridia;o__Clostridiales;f__Ruminococcaceae;g__Ruminococcus;s__Ruminococcus sp. CAG:379	0.251625	3.82147e-05	0.046411	BMI, Age, gender, usual stool type
Diseases	Irritable bowel syndrome (K58)	k__Bacteria;p__Proteobacteria;c__Betaproteobacteria;o__Burkholderiales;f__Burkholderiaceae;g__Ralstonia;s__Ralstonia solanacearum	0.294756	2.52348e-05	0.0310587	BMI, Age, gender, usual stool type, history of antibiotic usage
Diseases	Major depressive disorder, recurrent (F33)	k__Bacteria;p__Bacteroidetes;c__Bacteroidia;o__Bacteroidales;f__Bacteroidaceae;g__Bacteroides;s__Bacteroides cellulosilyticus	0.642266	5.43472e-06	0.00669014	BMI, Age, gender, usual stool type
Diseases	Major depressive disorder, recurrent (F33)	k__Bacteria;p__Bacteroidetes;c__Bacteroidia;o__Bacteroidales;f__Bacteroidaceae;g__Bacteroides;s__Bacteroides cellulosilyticus	0.586278	2.84738e-05	0.0350513	BMI, Age, gender, usual stool type, history of antibiotic usage
Diseases	Malignant neoplasm of colon (C18)	k__Bacteria;p__Firmicutes;c__Clostridia;o__Clostridiales;f__Clostridiaceae;g__Clostridium;s__Clostridium sp. AM34-11AC	1.32939	5.0523e-07	0.000621917	BMI, Age, gender, usual stool type
Diseases	Malignant neoplasm of colon (C18)	k__Bacteria;p__Proteobacteria;c__Betaproteobacteria;o__Unclassified;f__Unclassified;g__Candidatus Accumulibacter;s__Candidatus Accumulibacter sp. BA-91	0.814938	4.22415e-06	0.00519497	BMI, Age, gender, usual stool type
Diseases	Malignant neoplasm of colon (C18)	k__Bacteria;p__Proteobacteria;c__Gammaproteobacteria;o__Pseudomonadales;f__Moraxellaceae;g__Acinetobacter;s__Acinetobacter baumannii	0.848545	1.01545e-05	0.0124766	BMI, Age, gender, usual stool type
Diseases	Malignant neoplasm of colon (C18)	k__Eukaryota;p__Arthropoda;c__Arachnida;o__Araneae;f__Araneidae;g__Nephila;s__Nephila clavipes	0.696817	1.77368e-05	0.0217693	BMI, Age, gender, usual stool type
Diseases	Malignant neoplasm of colon (C18)	k__Bacteria;p__Proteobacteria;c__Deltaproteobacteria;o__Myxococcales;f__Archangiaceae;g__Stigmatella;s__Stigmatella aurantiaca	0.638902	2.35551e-05	0.0288925	BMI, Age, gender, usual stool type
Diseases	Malignant neoplasm of colon (C18)	k__Bacteria;p__Firmicutes;c__Clostridia;o__Clostridiales;f__Clostridiaceae;g__Clostridium;s__Clostridium sp. AM34-11AC	1.31303	6.85243e-07	0.000843505	BMI, Age, gender, usual stool type, history of antibiotic usage
Diseases	Malignant neoplasm of colon (C18)	k__Bacteria;p__Proteobacteria;c__Betaproteobacteria;o__Unclassified;f__Unclassified;g__Candidatus Accumulibacter;s__Candidatus Accumulibacter sp. BA-91	0.798539	6.26847e-06	0.00770911	BMI, Age, gender, usual stool type, history of antibiotic usage
Diseases	Malignant neoplasm of colon (C18)	k__Bacteria;p__Proteobacteria;c__Gammaproteobacteria;o__Pseudomonadales;f__Moraxellaceae;g__Acinetobacter;s__Acinetobacter baumannii	0.813735	1.91197e-05	0.0234898	BMI, Age, gender, usual stool type, history of antibiotic usage
Diseases	Malignant neoplasm of colon (C18)	k__Eukaryota;p__Arthropoda;c__Arachnida;o__Araneae;f__Araneidae;g__Nephila;s__Nephila clavipes	0.67603	2.87852e-05	0.0353293	BMI, Age, gender, usual stool type, history of antibiotic usage
Diseases	Other anxiety disorders (F41)	k__Bacteria;p__Bacteroidetes;c__Bacteroidia;o__Bacteroidales;f__Bacteroidaceae;g__Bacteroides;s__Bacteroides thetaiotaomicron	0.477202	6.45914e-07	0.000795039	BMI, Age, gender, usual stool type
Diseases	Other anxiety disorders (F41)	k__Bacteria;p__Bacteroidetes;c__Bacteroidia;o__Bacteroidales;f__Bacteroidaceae;g__Bacteroides;s__Bacteroides sp. AF37-16AC	0.693897	1.03757e-06	0.00127584	BMI, Age, gender, usual stool type
Diseases	Other anxiety disorders (F41)	k__Bacteria;p__Bacteroidetes;c__Bacteroidia;o__Bacteroidales;f__Tannerellaceae;g__Parabacteroides;s__Parabacteroides sp. D25	0.558821	1.65348e-06	0.00203122	BMI, Age, gender, usual stool type
Diseases	Other anxiety disorders (F41)	k__Bacteria;p__Bacteroidetes;c__Bacteroidia;o__Bacteroidales;f__Bacteroidaceae;g__Bacteroides;s__Bacteroides dorei	0.49489	2.36838e-06	0.00290686	BMI, Age, gender, usual stool type
Diseases	Other anxiety disorders (F41)	k__Bacteria;p__Firmicutes;c__Clostridia;o__Clostridiales;f__Lachnospiraceae;g__Blautia;s__Blautia sp. CAG:237	0.336714	2.53767e-06	0.00311062	BMI, Age, gender, usual stool type
Diseases	Other anxiety disorders (F41)	k__Bacteria;p__Bacteroidetes;c__Bacteroidia;o__Bacteroidales;f__Bacteroidaceae;g__Bacteroides;s__Bacteroides sp. 3_1_40A	0.509213	2.69944e-06	0.00330891	BMI, Age, gender, usual stool type
Diseases	Other anxiety disorders (F41)	k__Bacteria;p__Firmicutes;c__Clostridia;o__Clostridiales;f__Ruminococcaceae;g__Ruminococcus;s__Ruminococcus sp. CAG:177	-0.748811	3.03942e-06	0.00372076	BMI, Age, gender, usual stool type
Diseases	Other anxiety disorders (F41)	k__Bacteria;p__Bacteroidetes;c__Bacteroidia;o__Bacteroidales;f__Bacteroidaceae;g__Bacteroides;s__Bacteroides sp. 1_1_14	0.533484	3.14146e-06	0.00384402	BMI, Age, gender, usual stool type
Diseases	Other anxiety disorders (F41)	k__Bacteria;p__Bacteroidetes;c__Bacteroidia;o__Bacteroidales;f__Bacteroidaceae;g__Bacteroides;s__Bacteroides sp. 4_3_47FAA	0.52716	3.2807e-06	0.00401295	BMI, Age, gender, usual stool type
Diseases	Other anxiety disorders (F41)	k__Bacteria;p__Bacteroidetes;c__Bacteroidia;o__Bacteroidales;f__Bacteroidaceae;g__Bacteroides;s__Bacteroides uniformis	0.473141	3.45095e-06	0.00421885	BMI, Age, gender, usual stool type
Diseases	Other anxiety disorders (F41)	k__Bacteria;p__Bacteroidetes;c__Bacteroidia;o__Bacteroidales;f__Bacteroidaceae;g__Bacteroides;s__Bacteroides sp. 4_1_36	0.536294	4.66446e-06	0.00569184	BMI, Age, gender, usual stool type
Diseases	Other anxiety disorders (F41)	k__Bacteria;p__Bacteroidetes;c__Bacteroidia;o__Bacteroidales;f__Bacteroidaceae;g__Bacteroides;s__Bacteroides nordii	0.373542	5.06798e-06	0.00618082	BMI, Age, gender, usual stool type
Diseases	Other anxiety disorders (F41)	k__Bacteria;p__Bacteroidetes;c__Bacteroidia;o__Bacteroidales;f__Bacteroidaceae;g__Bacteroides;s__Bacteroides thetaiotaomicron CAG:40	0.428514	6.56155e-06	0.00798849	BMI, Age, gender, usual stool type
Diseases	Other anxiety disorders (F41)	k__Bacteria;p__Bacteroidetes;c__Bacteroidia;o__Bacteroidales;f__Bacteroidaceae;g__Bacteroides;s__Bacteroides sp. D20	0.542333	7.59268e-06	0.00923	BMI, Age, gender, usual stool type
Diseases	Other anxiety disorders (F41)	k__Bacteria;p__Bacteroidetes;c__Bacteroidia;o__Bacteroidales;f__Bacteroidaceae;g__Bacteroides;s__Bacteroides sp. D22	0.503576	7.74856e-06	0.00941679	BMI, Age, gender, usual stool type
Diseases	Other anxiety disorders (F41)	k__Bacteria;p__Bacteroidetes;c__Bacteroidia;o__Bacteroidales;f__Bacteroidaceae;g__Bacteroides;s__Bacteroides intestinalis CAG:315	0.413832	7.8608e-06	0.00955153	BMI, Age, gender, usual stool type
Diseases	Other anxiety disorders (F41)	k__Bacteria;p__Firmicutes;c__Clostridia;o__Clostridiales;f__Unclassified;g__Unclassified;s__Clostridiales bacterium Marseille-P2846	-0.399611	8.51176e-06	0.0103292	BMI, Age, gender, usual stool type
Diseases	Other anxiety disorders (F41)	k__Bacteria;p__Bacteroidetes;c__Bacteroidia;o__Bacteroidales;f__Bacteroidaceae;g__Bacteroides;s__Bacteroides sp. AR29	0.592751	8.83836e-06	0.0107296	BMI, Age, gender, usual stool type
Diseases	Other anxiety disorders (F41)	k__Bacteria;p__Bacteroidetes;c__Bacteroidia;o__Bacteroidales;f__Bacteroidaceae;g__Bacteroides;s__Bacteroides finegoldii	0.473201	1.38917e-05	0.0168145	BMI, Age, gender, usual stool type
Diseases	Other anxiety disorders (F41)	k__Bacteria;p__Bacteroidetes;c__Bacteroidia;o__Bacteroidales;f__Bacteroidaceae;g__Bacteroides;s__Bacteroides ovatus	0.429648	1.45264e-05	0.0175705	BMI, Age, gender, usual stool type
Diseases	Other anxiety disorders (F41)	k__Bacteria;p__Bacteroidetes;c__Bacteroidia;o__Bacteroidales;f__Bacteroidaceae;g__Bacteroides;s__Bacteroides sp. AF25-17LB	0.582652	1.66771e-05	0.0201124	BMI, Age, gender, usual stool type
Diseases	Other anxiety disorders (F41)	k__Bacteria;p__Bacteroidetes;c__Bacteroidia;o__Bacteroidales;f__Bacteroidaceae;g__Bacteroides;s__Bacteroides fragilis	0.385166	1.79942e-05	0.0217029	BMI, Age, gender, usual stool type
Diseases	Other anxiety disorders (F41)	k__Bacteria;p__Bacteroidetes;c__Bacteroidia;o__Bacteroidales;f__Bacteroidaceae;g__Bacteroides;s__Bacteroides sp. 2_2_4	0.453419	1.82455e-05	0.0219967	BMI, Age, gender, usual stool type
Diseases	Other anxiety disorders (F41)	k__Bacteria;p__Firmicutes;c__Clostridia;o__Clostridiales;f__Eubacteriaceae;g__Eubacterium;s__Eubacterium sp. CAG:841	-0.604655	1.93534e-05	0.0232479	BMI, Age, gender, usual stool type
Diseases	Other anxiety disorders (F41)	k__Bacteria;p__Bacteroidetes;c__Bacteroidia;o__Bacteroidales;f__Bacteroidaceae;g__Bacteroides;s__Bacteroides clarus CAG:160	0.357317	2.05364e-05	0.0247043	BMI, Age, gender, usual stool type
Diseases	Other anxiety disorders (F41)	k__Bacteria;p__Bacteroidetes;c__Bacteroidia;o__Bacteroidales;f__Bacteroidaceae;g__Bacteroides;s__Bacteroides uniformis CAG:3	0.403364	2.1351e-05	0.0256653	BMI, Age, gender, usual stool type
Diseases	Other anxiety disorders (F41)	k__Bacteria;p__Cyanobacteria;c__Unclassified;o__Nostocales;f__Hapalosiphonaceae;g__Fischerella;s__Fischerella thermalis	0.56936	2.19078e-05	0.0262663	BMI, Age, gender, usual stool type
Diseases	Other anxiety disorders (F41)	k__Bacteria;p__Firmicutes;c__Clostridia;o__Clostridiales;f__Eubacteriaceae;g__Eubacterium;s__Eubacterium sp. AM28-29	-0.807733	2.28067e-05	0.0271842	BMI, Age, gender, usual stool type
Diseases	Other anxiety disorders (F41)	k__Bacteria;p__Firmicutes;c__Clostridia;o__Clostridiales;f__Clostridiaceae;g__Clostridium;s__Clostridium sp. CAG:226	-0.456126	2.40651e-05	0.0288252	BMI, Age, gender, usual stool type
Diseases	Other anxiety disorders (F41)	k__Bacteria;p__Bacteroidetes;c__Bacteroidia;o__Bacteroidales;f__Bacteroidaceae;g__Bacteroides;s__Bacteroides cellulosilyticus CAG:158	0.35764	2.44957e-05	0.0293631	BMI, Age, gender, usual stool type
Diseases	Other anxiety disorders (F41)	k__Bacteria;p__Unclassified;c__Unclassified;o__Unclassified;f__Unclassified;g__Unclassified;s__uncultured bacterium MedeBAC46A06	0.452745	2.58378e-05	0.0309119	BMI, Age, gender, usual stool type
Diseases	Other anxiety disorders (F41)	k__Bacteria;p__Firmicutes;c__Clostridia;o__Clostridiales;f__Ruminococcaceae;g__Ruminococcus;s__Ruminococcus sp. CAG:60	0.212593	2.66198e-05	0.0318248	BMI, Age, gender, usual stool type
Diseases	Other anxiety disorders (F41)	k__Bacteria;p__Firmicutes;c__Clostridia;o__Clostridiales;f__Eubacteriaceae;g__Eubacterium;s__Eubacterium sp. AF22-8LB	-0.864393	2.75817e-05	0.0322898	BMI, Age, gender, usual stool type
Diseases	Other anxiety disorders (F41)	k__Bacteria;p__Bacteroidetes;c__Bacteroidia;o__Bacteroidales;f__Bacteroidaceae;g__Bacteroides;s__Bacteroides fluxus	0.356743	2.72925e-05	0.0326346	BMI, Age, gender, usual stool type
Diseases	Other anxiety disorders (F41)	k__Bacteria;p__Bacteroidetes;c__Bacteroidia;o__Bacteroidales;f__Bacteroidaceae;g__Bacteroides;s__Bacteroides sartorii	0.423953	2.74874e-05	0.0328649	BMI, Age, gender, usual stool type
Diseases	Other anxiety disorders (F41)	k__Bacteria;p__Bacteroidetes;c__Bacteroidia;o__Bacteroidales;f__Bacteroidaceae;g__Bacteroides;s__Bacteroides sp. AF34-31BH	0.56242	2.75636e-05	0.0328944	BMI, Age, gender, usual stool type
Diseases	Other anxiety disorders (F41)	k__Bacteria;p__Cyanobacteria;c__Unclassified;o__Oscillatoriales;f__Microcoleaceae;g__Trichodesmium;s__Trichodesmium erythraeum	0.307728	2.99449e-05	0.0356754	BMI, Age, gender, usual stool type
Diseases	Other anxiety disorders (F41)	k__Bacteria;p__Bacteroidetes;c__Bacteroidia;o__Bacteroidales;f__Tannerellaceae;g__Tannerella;s__Tannerella sp. 6_1_58FAA_CT1	0.344675	3.02338e-05	0.0360609	BMI, Age, gender, usual stool type
Diseases	Other anxiety disorders (F41)	k__Bacteria;p__Bacteroidetes;c__Bacteroidia;o__Bacteroidales;f__Bacteroidaceae;g__Bacteroides;s__Bacteroides dorei CAG:222	0.38637	3.0413e-05	0.0362667	BMI, Age, gender, usual stool type
Diseases	Other anxiety disorders (F41)	k__Bacteria;p__Bacteroidetes;c__Bacteroidia;o__Bacteroidales;f__Bacteroidaceae;g__Bacteroides;s__Bacteroides sp. 3_1_33FAA	0.397019	3.1059e-05	0.0370148	BMI, Age, gender, usual stool type
Diseases	Other anxiety disorders (F41)	k__Bacteria;p__Bacteroidetes;c__Bacteroidia;o__Bacteroidales;f__Bacteroidaceae;g__Bacteroides;s__Bacteroides sp. D1	0.436759	3.39493e-05	0.0403146	BMI, Age, gender, usual stool type
Diseases	Other anxiety disorders (F41)	k__Bacteria;p__Bacteroidetes;c__Bacteroidia;o__Bacteroidales;f__Bacteroidaceae;g__Bacteroides;s__Bacteroides stercoris CAG:120	0.355881	3.53875e-05	0.0420377	BMI, Age, gender, usual stool type
Diseases	Other anxiety disorders (F41)	k__Bacteria;p__Bacteroidetes;c__Bacteroidia;o__Bacteroidales;f__Bacteroidaceae;g__Bacteroides;s__Bacteroides oleiciplenus	0.420254	3.63776e-05	0.0431672	BMI, Age, gender, usual stool type
Diseases	Other anxiety disorders (F41)	k__Bacteria;p__Bacteroidetes;c__Bacteroidia;o__Bacteroidales;f__Bacteroidaceae;g__Bacteroides;s__Bacteroides finegoldii CAG:203	0.343657	3.75481e-05	0.0445218	BMI, Age, gender, usual stool type
Diseases	Other anxiety disorders (F41)	k__Bacteria;p__Bacteroidetes;c__Bacteroidia;o__Bacteroidales;f__Bacteroidaceae;g__Bacteroides;s__Bacteroides vulgatus	0.427702	3.76489e-05	0.0446356	BMI, Age, gender, usual stool type
Diseases	Other anxiety disorders (F41)	k__Bacteria;p__Bacteroidetes;c__Bacteroidia;o__Bacteroidales;f__Tannerellaceae;g__Parabacteroides;s__Parabacteroides sp. CAG:2	0.37456	3.90099e-05	0.0462034	BMI, Age, gender, usual stool type
Diseases	Other anxiety disorders (F41)	k__Bacteria;p__Actinobacteria;c__Coriobacteriia;o__Eggerthellales;f__Eggerthellaceae;g__Eggerthella;s__Eggerthella sp. 51_9	-0.708597	4.14893e-05	0.0483072	BMI, Age, gender, usual stool type
Diseases	Other anxiety disorders (F41)	k__Bacteria;p__Firmicutes;c__Unclassified;o__Unclassified;f__Unclassified;g__Unclassified;s__Firmicutes bacterium CAG:176_59_8	-0.587144	4.25221e-05	0.0499157	BMI, Age, gender, usual stool type
Diseases	Other anxiety disorders (F41)	k__Bacteria;p__Firmicutes;c__Clostridia;o__Clostridiales;f__Ruminococcaceae;g__Ruminococcus;s__Ruminococcus sp. CAG:177	-0.708118	1.17403e-05	0.0144516	BMI, Age, gender, usual stool type, history of antibiotic usage
Diseases	Other anxiety disorders (F41)	k__Bacteria;p__Bacteroidetes;c__Bacteroidia;o__Bacteroidales;f__Bacteroidaceae;g__Bacteroides;s__Bacteroides thetaiotaomicron	0.394732	3.58207e-05	0.0440185	BMI, Age, gender, usual stool type, history of antibiotic usage
Diseases	Other anxiety disorders (F41)	k__Bacteria;p__Firmicutes;c__Clostridia;o__Clostridiales;f__Lachnospiraceae;g__Blautia;s__Blautia sp. CAG:237	0.296337	3.65503e-05	0.0449086	BMI, Age, gender, usual stool type, history of antibiotic usage
Diseases	Self reported mental health status OK (N0Y1)	k__Bacteria;p__Proteobacteria;c__Alphaproteobacteria;o__Rhodospirillales;f__Acetobacteraceae;g__Acidiphilium;s__Acidiphilium sp. CAG:727	0.514581	2.33946e-06	0.0028781	BMI, Age, gender, usual stool type
Diseases	Self reported mental health status OK (N0Y1)	k__Bacteria;p__Firmicutes;c__Unclassified;o__Unclassified;f__Unclassified;g__Unclassified;s__Firmicutes bacterium CAG:345	0.747905	6.24009e-06	0.0076635	BMI, Age, gender, usual stool type
Diseases	Self reported mental health status OK (N0Y1)	k__Bacteria;p__Lentisphaerae;c__Unclassified;o__Unclassified;f__Unclassified;g__Unclassified;s__Lentisphaerae bacterium	0.554447	6.45583e-06	0.00791026	BMI, Age, gender, usual stool type
Diseases	Self reported mental health status OK (N0Y1)	k__Bacteria;p__Tenericutes;c__Mollicutes;o__Anaeroplasmatales;f__Anaeroplasmataceae;g__Anaeroplasma;s__Anaeroplasma bactoclasticum	0.595252	6.89703e-06	0.0084471	BMI, Age, gender, usual stool type
Diseases	Self reported mental health status OK (N0Y1)	k__Bacteria;p__Bacteroidetes;c__Bacteroidia;o__Bacteroidales;f__Tannerellaceae;g__Parabacteroides;s__Parabacteroides sp. D13	-0.286462	1.58501e-05	0.0194382	BMI, Age, gender, usual stool type
Diseases	Self reported mental health status OK (N0Y1)	k__Bacteria;p__Firmicutes;c__Clostridia;o__Clostridiales;f__Clostridiaceae;g__Clostridium;s__Clostridium sp. CAG:568	0.769443	1.75799e-05	0.0215044	BMI, Age, gender, usual stool type
Diseases	Self reported mental health status OK (N0Y1)	k__Bacteria;p__Bacteroidetes;c__Bacteroidia;o__Bacteroidales;f__Tannerellaceae;g__Parabacteroides;s__Parabacteroides distasonis	-0.262767	2.13577e-05	0.0261469	BMI, Age, gender, usual stool type
Diseases	Self reported mental health status OK (N0Y1)	k__Bacteria;p__Bacteroidetes;c__Bacteroidia;o__Bacteroidales;f__Bacteroidaceae;g__Bacteroides;s__Bacteroides dorei CAG:222	-0.288801	2.27126e-05	0.0277902	BMI, Age, gender, usual stool type
Diseases	Self reported mental health status OK (N0Y1)	k__Bacteria;p__Lentisphaerae;c__Lentisphaeria;o__Victivallales;f__Victivallaceae;g__Victivallis;s__Victivallis vadensis	0.506585	2.77974e-05	0.0339377	BMI, Age, gender, usual stool type
Diseases	Self reported mental health status OK (N0Y1)	k__Bacteria;p__Bacteroidetes;c__Bacteroidia;o__Bacteroidales;f__Bacteroidaceae;g__Bacteroides;s__Bacteroides dorei	-0.321422	3.14727e-05	0.0384005	BMI, Age, gender, usual stool type
Diseases	Self reported mental health status OK (N0Y1)	k__Bacteria;p__Firmicutes;c__Clostridia;o__Clostridiales;f__Ruminococcaceae;g__Faecalibacterium;s__Faecalibacterium sp. CAG:1138	0.447223	3.28641e-05	0.040077	BMI, Age, gender, usual stool type
Diseases	Self reported mental health status OK (N0Y1)	k__Bacteria;p__Bacteroidetes;c__Bacteroidia;o__Bacteroidales;f__Bacteroidaceae;g__Bacteroides;s__Bacteroides sp. 3_1_19	-0.34252	3.3589e-05	0.0409534	BMI, Age, gender, usual stool type
Diseases	Self reported mental health status OK (N0Y1)	k__Bacteria;p__Firmicutes;c__Clostridia;o__Clostridiales;f__Clostridiaceae;g__Clostridium;s__Clostridium sp. CAG:7	-0.287674	3.38083e-05	0.0412001	BMI, Age, gender, usual stool type
Diseases	Self reported mental health status OK (N0Y1)	k__Bacteria;p__Proteobacteria;c__Alphaproteobacteria;o__Rhodospirillales;f__Acetobacteraceae;g__Acidiphilium;s__Acidiphilium sp. CAG:727	0.476815	1.10663e-05	0.0136146	BMI, Age, gender, usual stool type, history of antibiotic usage
Diseases	Self reported mental health status OK (N0Y1)	k__Bacteria;p__Lentisphaerae;c__Unclassified;o__Unclassified;f__Unclassified;g__Unclassified;s__Lentisphaerae bacterium	0.52048	2.17879e-05	0.0267349	BMI, Age, gender, usual stool type, history of antibiotic usage
Diseases	Self reported mental health status OK (N0Y1)	k__Bacteria;p__Tenericutes;c__Mollicutes;o__Anaeroplasmatales;f__Anaeroplasmataceae;g__Anaeroplasma;s__Anaeroplasma bactoclasticum	0.543696	3.59313e-05	0.0439839	BMI, Age, gender, usual stool type, history of antibiotic usage
Diseases	Self reported mental health status OK (N0Y1)	k__Bacteria;p__Firmicutes;c__Unclassified;o__Unclassified;f__Unclassified;g__Unclassified;s__Firmicutes bacterium CAG:345	0.67614	3.81502e-05	0.0468214	BMI, Age, gender, usual stool type, history of antibiotic usage
Diseases	Self reported physical health status OK (N0Y1)	k__Bacteria;p__Firmicutes;c__Clostridia;o__Clostridiales;f__Clostridiaceae;g__Clostridium;s__Clostridium sp. CAG:302	0.785867	3.61025e-06	0.00444099	BMI, Age, gender, usual stool type
Diseases	Self reported physical health status OK (N0Y1)	k__Bacteria;p__Bacteroidetes;c__Bacteroidia;o__Bacteroidales;f__Tannerellaceae;g__Parabacteroides;s__Parabacteroides merdae	-0.410512	4.43821e-06	0.00545825	BMI, Age, gender, usual stool type
Diseases	Self reported physical health status OK (N0Y1)	k__Bacteria;p__Firmicutes;c__Clostridia;o__Clostridiales;f__Lachnospiraceae;g__Anaerotignum;s__Anaerotignum lactatifermentans	-0.251763	9.14287e-06	0.0112217	BMI, Age, gender, usual stool type
Diseases	Self reported physical health status OK (N0Y1)	k__Bacteria;p__Tenericutes;c__Mollicutes;o__Anaeroplasmatales;f__Anaeroplasmataceae;g__Anaeroplasma;s__Anaeroplasma bactoclasticum	0.60204	1.0533e-05	0.0128815	BMI, Age, gender, usual stool type
Diseases	Self reported physical health status OK (N0Y1)	k__Bacteria;p__Firmicutes;c__Unclassified;o__Unclassified;f__Unclassified;g__Unclassified;s__Firmicutes bacterium CAG:321_26_22	0.626709	1.08077e-05	0.0132496	BMI, Age, gender, usual stool type
Diseases	Self reported physical health status OK (N0Y1)	k__Bacteria;p__Unclassified;c__Unclassified;o__Unclassified;f__Unclassified;g__Unclassified;s__uncultured bacterium	-0.196912	1.33114e-05	0.0163207	BMI, Age, gender, usual stool type
Diseases	Self reported physical health status OK (N0Y1)	k__Bacteria;p__Bacteroidetes;c__Bacteroidia;o__Bacteroidales;f__Bacteroidaceae;g__Bacteroides;s__Bacteroides sp. 4_3_47FAA	-0.371818	1.68459e-05	0.0206249	BMI, Age, gender, usual stool type
Diseases	Self reported physical health status OK (N0Y1)	k__Bacteria;p__Proteobacteria;c__Gammaproteobacteria;o__Pseudomonadales;f__Pseudomonadaceae;g__Pseudomonas;s__Pseudomonas chlororaphis	-0.347741	2.32818e-05	0.0284296	BMI, Age, gender, usual stool type
Diseases	Self reported physical health status OK (N0Y1)	k__Bacteria;p__Firmicutes;c__Clostridia;o__Clostridiales;f__Oscillospiraceae;g__Oscillibacter;s__Oscillibacter sp. KLE 1728	-0.233708	2.66019e-05	0.0324642	BMI, Age, gender, usual stool type
Diseases	Self reported physical health status OK (N0Y1)	k__Bacteria;p__Bacteroidetes;c__Bacteroidia;o__Bacteroidales;f__Bacteroidaceae;g__Bacteroides;s__Bacteroides sartorii	-0.323661	2.66862e-05	0.032574	BMI, Age, gender, usual stool type
Diseases	Self reported physical health status OK (N0Y1)	k__Bacteria;p__Bacteroidetes;c__Bacteroidia;o__Bacteroidales;f__Bacteroidaceae;g__Bacteroides;s__Bacteroides sp. AF34-31BH	-0.429878	2.67154e-05	0.0325775	BMI, Age, gender, usual stool type
Diseases	Self reported physical health status OK (N0Y1)	k__Bacteria;p__Firmicutes;c__Clostridia;o__Clostridiales;f__Clostridiaceae;g__Clostridium;s__Clostridium sp. CAG:417	0.718936	2.75873e-05	0.0335384	BMI, Age, gender, usual stool type
Diseases	Self reported physical health status OK (N0Y1)	k__Bacteria;p__Bacteroidetes;c__Bacteroidia;o__Bacteroidales;f__Bacteroidaceae;g__Bacteroides;s__Bacteroides uniformis	-0.322197	3.39857e-05	0.0413857	BMI, Age, gender, usual stool type
Diseases	Self reported physical health status OK (N0Y1)	k__Bacteria;p__Bacteroidetes;c__Bacteroidia;o__Bacteroidales;f__Bacteroidaceae;g__Bacteroides;s__Bacteroides sp. D20	-0.381786	3.58611e-05	0.0436411	BMI, Age, gender, usual stool type
Diseases	Self reported physical health status OK (N0Y1)	k__Bacteria;p__Bacteroidetes;c__Bacteroidia;o__Bacteroidales;f__Bacteroidaceae;g__Bacteroides;s__Bacteroides sp. AF29-11	-0.423009	3.77799e-05	0.0459117	BMI, Age, gender, usual stool type
Diseases	Self reported physical health status OK (N0Y1)	k__Bacteria;p__Firmicutes;c__Clostridia;o__Clostridiales;f__Clostridiaceae;g__Clostridium;s__Clostridium sp. CAG:245	0.61629	3.99705e-05	0.0484763	BMI, Age, gender, usual stool type
Diseases	Self reported physical health status OK (N0Y1)	k__Bacteria;p__Firmicutes;c__Clostridia;o__Clostridiales;f__Clostridiaceae;g__Clostridium;s__Clostridium sp. CAG:302	0.748349	1.15412e-05	0.0142064	BMI, Age, gender, usual stool type, history of antibiotic usage
Diseases	Self reported physical health status OK (N0Y1)	k__Bacteria;p__Firmicutes;c__Unclassified;o__Unclassified;f__Unclassified;g__Unclassified;s__Firmicutes bacterium CAG:321_26_22	0.593956	3.37072e-05	0.041447	BMI, Age, gender, usual stool type, history of antibiotic usage
Diseases	Type 1 diabetes mellitus (E10)	k__Bacteria;p__Proteobacteria;c__Gammaproteobacteria;o__Enterobacterales;f__Enterobacteriaceae;g__Escherichia;s__Escherichia coli	2.72734	1.18865e-06	0.00146218	BMI, Age, gender, usual stool type
Diseases	Type 1 diabetes mellitus (E10)	k__Bacteria;p__Proteobacteria;c__Gammaproteobacteria;o__Enterobacterales;f__Enterobacteriaceae;g__Cronobacter;s__Cronobacter malonaticus	1.15359	2.00146e-06	0.00245977	BMI, Age, gender, usual stool type
Diseases	Type 1 diabetes mellitus (E10)	k__Bacteria;p__Firmicutes;c__Clostridia;o__Clostridiales;f__Clostridiaceae;g__Clostridium;s__Clostridium sp. CAG:413	1.68669	2.75842e-06	0.00338825	BMI, Age, gender, usual stool type
Diseases	Type 1 diabetes mellitus (E10)	k__Bacteria;p__Firmicutes;c__Clostridia;o__Clostridiales;f__Ruminococcaceae;g__Ruminococcus;s__Ruminococcus sp. CAG:382	1.70962	4.96131e-06	0.00608741	BMI, Age, gender, usual stool type
Diseases	Type 1 diabetes mellitus (E10)	k__Bacteria;p__Firmicutes;c__Clostridia;o__Clostridiales;f__Lachnospiraceae;g__Unclassified;s__Lachnospiraceae bacterium 10-1	1.62059	1.71243e-05	0.0209738	BMI, Age, gender, usual stool type
Diseases	Type 1 diabetes mellitus (E10)	k__Bacteria;p__Firmicutes;c__Clostridia;o__Clostridiales;f__Clostridiaceae;g__Clostridium;s__Clostridium sp. CAG:632	1.87993	2.33759e-05	0.028608	BMI, Age, gender, usual stool type
Diseases	Type 1 diabetes mellitus (E10)	k__Bacteria;p__Firmicutes;c__Clostridia;o__Clostridiales;f__Ruminococcaceae;g__Flavonifractor;s__Flavonifractor sp. An306	1.12032	2.57508e-05	0.031509	BMI, Age, gender, usual stool type
Diseases	Type 1 diabetes mellitus (E10)	k__Bacteria;p__Proteobacteria;c__Gammaproteobacteria;o__Enterobacterales;f__Enterobacteriaceae;g__Escherichia;s__Escherichia coli	2.65218	2.17448e-06	0.00267359	BMI, Age, gender, usual stool type, history of antibiotic usage
Diseases	Type 1 diabetes mellitus (E10)	k__Bacteria;p__Firmicutes;c__Clostridia;o__Clostridiales;f__Ruminococcaceae;g__Ruminococcus;s__Ruminococcus sp. CAG:382	1.76579	2.22487e-06	0.00273509	BMI, Age, gender, usual stool type, history of antibiotic usage
Diseases	Type 1 diabetes mellitus (E10)	k__Bacteria;p__Firmicutes;c__Clostridia;o__Clostridiales;f__Clostridiaceae;g__Clostridium;s__Clostridium sp. CAG:413	1.65988	3.93785e-06	0.00483297	BMI, Age, gender, usual stool type, history of antibiotic usage
Diseases	Type 1 diabetes mellitus (E10)	k__Bacteria;p__Proteobacteria;c__Gammaproteobacteria;o__Enterobacterales;f__Enterobacteriaceae;g__Cronobacter;s__Cronobacter malonaticus	1.10993	4.24735e-06	0.00521188	BMI, Age, gender, usual stool type, history of antibiotic usage
Diseases	Type 1 diabetes mellitus (E10)	k__Bacteria;p__Firmicutes;c__Clostridia;o__Clostridiales;f__Lachnospiraceae;g__Unclassified;s__Lachnospiraceae bacterium 10-1	1.66998	8.97568e-06	0.0109979	BMI, Age, gender, usual stool type, history of antibiotic usage
Diseases	Type 1 diabetes mellitus (E10)	k__Bacteria;p__Firmicutes;c__Clostridia;o__Clostridiales;f__Clostridiaceae;g__Clostridium;s__Clostridium sp. CAG:632	1.92601	1.43863e-05	0.0176128	BMI, Age, gender, usual stool type, history of antibiotic usage
Diseases	Type 1 diabetes mellitus (E10)	k__Bacteria;p__Firmicutes;c__Clostridia;o__Clostridiales;f__Ruminococcaceae;g__Flavonifractor;s__Flavonifractor sp. An306	1.09236	3.98093e-05	0.0486673	BMI, Age, gender, usual stool type, history of antibiotic usage
Diseases	Type 2 diabetes mellitus (E11)	k__Bacteria;p__Proteobacteria;c__Gammaproteobacteria;o__Enterobacterales;f__Enterobacteriaceae;g__Escherichia;s__Escherichia coli	1.88544	1.01955e-21	1.25506e-18	BMI, Age, gender, usual stool type
Diseases	Type 2 diabetes mellitus (E11)	k__Bacteria;p__Proteobacteria;c__Gammaproteobacteria;o__Enterobacterales;f__Enterobacteriaceae;g__Shigella;s__Shigella sonnei	1.17606	8.59556e-16	1.05725e-12	BMI, Age, gender, usual stool type
Diseases	Type 2 diabetes mellitus (E11)	k__Bacteria;p__Proteobacteria;c__Gammaproteobacteria;o__Enterobacterales;f__Enterobacteriaceae;g__Shigella;s__Shigella flexneri	1.27112	8.36456e-14	1.028e-10	BMI, Age, gender, usual stool type
Diseases	Type 2 diabetes mellitus (E11)	k__Bacteria;p__Firmicutes;c__Clostridia;o__Clostridiales;f__Lachnospiraceae;g__Lachnoclostridium;s__[Clostridium] clostridioforme	0.704643	8.99172e-12	1.10418e-08	BMI, Age, gender, usual stool type
Diseases	Type 2 diabetes mellitus (E11)	k__Bacteria;p__Firmicutes;c__Clostridia;o__Clostridiales;f__Peptostreptococcaceae;g__Romboutsia;s__Romboutsia timonensis	-1.71493	2.15794e-10	2.64713e-07	BMI, Age, gender, usual stool type
Diseases	Type 2 diabetes mellitus (E11)	k__Bacteria;p__Proteobacteria;c__Gammaproteobacteria;o__Enterobacterales;f__Enterobacteriaceae;g__Citrobacter;s__Citrobacter koseri	0.866977	8.48542e-10	1.04035e-06	BMI, Age, gender, usual stool type
Diseases	Type 2 diabetes mellitus (E11)	k__Bacteria;p__Proteobacteria;c__Gammaproteobacteria;o__Enterobacterales;f__Enterobacteriaceae;g__Salmonella;s__Salmonella enterica	0.643735	1.0765e-08	1.3187e-05	BMI, Age, gender, usual stool type
Diseases	Type 2 diabetes mellitus (E11)	k__Bacteria;p__Firmicutes;c__Clostridia;o__Clostridiales;f__Lachnospiraceae;g__Lachnoclostridium;s__[Clostridium] bolteae	0.50731	4.20037e-08	5.14094e-05	BMI, Age, gender, usual stool type
Diseases	Type 2 diabetes mellitus (E11)	k__Bacteria;p__Firmicutes;c__Clostridia;o__Clostridiales;f__Unclassified;g__Unclassified;s__Clostridiales bacterium VE202-03	0.563716	2.77061e-07	0.000338694	BMI, Age, gender, usual stool type
Diseases	Type 2 diabetes mellitus (E11)	k__Bacteria;p__Firmicutes;c__Clostridia;o__Clostridiales;f__Peptostreptococcaceae;g__Intestinibacter;s__Intestinibacter bartlettii	-1.08241	5.84504e-07	0.000713727	BMI, Age, gender, usual stool type
Diseases	Type 2 diabetes mellitus (E11)	k__Bacteria;p__Proteobacteria;c__Gammaproteobacteria;o__Enterobacterales;f__Enterobacteriaceae;g__Klebsiella;s__Klebsiella oxytoca	0.436376	6.26642e-07	0.000765301	BMI, Age, gender, usual stool type
Diseases	Type 2 diabetes mellitus (E11)	k__Bacteria;p__Bacteroidetes;c__Bacteroidia;o__Bacteroidales;f__Bacteroidaceae;g__Bacteroides;s__Bacteroides sp. AF14-46	-1.48458	3.17426e-06	0.00386766	BMI, Age, gender, usual stool type
Diseases	Type 2 diabetes mellitus (E11)	k__Bacteria;p__Firmicutes;c__Clostridia;o__Clostridiales;f__Ruminococcaceae;g__Flavonifractor;s__Flavonifractor plautii	0.337766	3.94885e-06	0.00481075	BMI, Age, gender, usual stool type
Diseases	Type 2 diabetes mellitus (E11)	k__Bacteria;p__Proteobacteria;c__Gammaproteobacteria;o__Enterobacterales;f__Enterobacteriaceae;g__Enterobacter;s__Enterobacter cloacae	0.418642	4.37354e-06	0.0053253	BMI, Age, gender, usual stool type
Diseases	Type 2 diabetes mellitus (E11)	k__Bacteria;p__Firmicutes;c__Clostridia;o__Clostridiales;f__Clostridiaceae;g__Unclassified;s__Clostridiaceae bacterium OM08-6BH	-0.545004	5.65912e-06	0.00688171	BMI, Age, gender, usual stool type
Diseases	Type 2 diabetes mellitus (E11)	k__Bacteria;p__Firmicutes;c__Clostridia;o__Clostridiales;f__Clostridiaceae;g__Hungatella;s__Hungatella hathewayi	0.364582	7.04596e-06	0.00856345	BMI, Age, gender, usual stool type
Diseases	Type 2 diabetes mellitus (E11)	k__Bacteria;p__Firmicutes;c__Unclassified;o__Unclassified;f__Unclassified;g__Unclassified;s__Firmicutes bacterium AF16-15	-0.677122	1.16711e-05	0.0141593	BMI, Age, gender, usual stool type
Diseases	Type 2 diabetes mellitus (E11)	k__Bacteria;p__Firmicutes;c__Clostridia;o__Clostridiales;f__Ruminococcaceae;g__Ruminococcus;s__Ruminococcus albus	-0.607505	1.7185e-05	0.0208027	BMI, Age, gender, usual stool type
Diseases	Type 2 diabetes mellitus (E11)	k__Bacteria;p__Firmicutes;c__Clostridia;o__Clostridiales;f__Oscillospiraceae;g__Unclassified;s__Oscillospiraceae bacterium VE202-24	0.561086	1.86798e-05	0.022638	BMI, Age, gender, usual stool type
Diseases	Type 2 diabetes mellitus (E11)	k__Bacteria;p__Proteobacteria;c__Gammaproteobacteria;o__Enterobacterales;f__Enterobacteriaceae;g__Cronobacter;s__Cronobacter malonaticus	0.363403	2.39316e-05	0.028972	BMI, Age, gender, usual stool type
Diseases	Type 2 diabetes mellitus (E11)	k__Bacteria;p__Firmicutes;c__Unclassified;o__Unclassified;f__Unclassified;g__Unclassified;s__Firmicutes bacterium CAG:24	-0.68457	2.52695e-05	0.0305906	BMI, Age, gender, usual stool type
Diseases	Type 2 diabetes mellitus (E11)	k__Bacteria;p__Proteobacteria;c__Deltaproteobacteria;o__Myxococcales;f__Archangiaceae;g__Stigmatella;s__Stigmatella aurantiaca	0.317015	3.74572e-05	0.0452855	BMI, Age, gender, usual stool type
Diseases	Type 2 diabetes mellitus (E11)	k__Bacteria;p__Proteobacteria;c__Gammaproteobacteria;o__Enterobacterales;f__Enterobacteriaceae;g__Escherichia;s__Escherichia coli	1.84358	7.19063e-21	8.85167e-18	BMI, Age, gender, usual stool type, history of antibiotic usage
Diseases	Type 2 diabetes mellitus (E11)	k__Bacteria;p__Proteobacteria;c__Gammaproteobacteria;o__Enterobacterales;f__Enterobacteriaceae;g__Shigella;s__Shigella sonnei	1.12999	8.2402e-15	1.01354e-11	BMI, Age, gender, usual stool type, history of antibiotic usage
Diseases	Type 2 diabetes mellitus (E11)	k__Bacteria;p__Proteobacteria;c__Gammaproteobacteria;o__Enterobacterales;f__Enterobacteriaceae;g__Shigella;s__Shigella flexneri	1.21676	7.12072e-13	8.75136e-10	BMI, Age, gender, usual stool type, history of antibiotic usage
Diseases	Type 2 diabetes mellitus (E11)	k__Bacteria;p__Firmicutes;c__Clostridia;o__Clostridiales;f__Lachnospiraceae;g__Lachnoclostridium;s__[Clostridium] clostridioforme	0.664343	9.13213e-11	1.12117e-07	BMI, Age, gender, usual stool type, history of antibiotic usage
Diseases	Type 2 diabetes mellitus (E11)	k__Bacteria;p__Firmicutes;c__Clostridia;o__Clostridiales;f__Peptostreptococcaceae;g__Romboutsia;s__Romboutsia timonensis	-1.69362	3.89342e-10	4.77687e-07	BMI, Age, gender, usual stool type, history of antibiotic usage
Diseases	Type 2 diabetes mellitus (E11)	k__Bacteria;p__Proteobacteria;c__Gammaproteobacteria;o__Enterobacterales;f__Enterobacteriaceae;g__Citrobacter;s__Citrobacter koseri	0.830584	3.85148e-09	4.72195e-06	BMI, Age, gender, usual stool type, history of antibiotic usage
Diseases	Type 2 diabetes mellitus (E11)	k__Bacteria;p__Proteobacteria;c__Gammaproteobacteria;o__Enterobacterales;f__Enterobacteriaceae;g__Salmonella;s__Salmonella enterica	0.607827	5.88138e-08	7.20382e-05	BMI, Age, gender, usual stool type, history of antibiotic usage
Diseases	Type 2 diabetes mellitus (E11)	k__Bacteria;p__Firmicutes;c__Clostridia;o__Clostridiales;f__Lachnospiraceae;g__Lachnoclostridium;s__[Clostridium] bolteae	0.472522	2.73508e-07	0.000334613	BMI, Age, gender, usual stool type, history of antibiotic usage
Diseases	Type 2 diabetes mellitus (E11)	k__Bacteria;p__Firmicutes;c__Clostridia;o__Clostridiales;f__Peptostreptococcaceae;g__Intestinibacter;s__Intestinibacter bartlettii	-1.1005	3.98685e-07	0.000487326	BMI, Age, gender, usual stool type, history of antibiotic usage
Diseases	Type 2 diabetes mellitus (E11)	k__Bacteria;p__Firmicutes;c__Clostridia;o__Clostridiales;f__Unclassified;g__Unclassified;s__Clostridiales bacterium VE202-03	0.540106	8.3663e-07	0.00102225	BMI, Age, gender, usual stool type, history of antibiotic usage
Diseases	Type 2 diabetes mellitus (E11)	k__Bacteria;p__Bacteroidetes;c__Bacteroidia;o__Bacteroidales;f__Bacteroidaceae;g__Bacteroides;s__Bacteroides sp. AF14-46	-1.52468	1.77156e-06	0.0021619	BMI, Age, gender, usual stool type, history of antibiotic usage
Diseases	Type 2 diabetes mellitus (E11)	k__Bacteria;p__Proteobacteria;c__Gammaproteobacteria;o__Enterobacterales;f__Enterobacteriaceae;g__Klebsiella;s__Klebsiella oxytoca	0.416252	1.95151e-06	0.00238138	BMI, Age, gender, usual stool type, history of antibiotic usage
Diseases	Type 2 diabetes mellitus (E11)	k__Bacteria;p__Firmicutes;c__Unclassified;o__Unclassified;f__Unclassified;g__Unclassified;s__Firmicutes bacterium AF16-15	-0.692492	7.65212e-06	0.00931622	BMI, Age, gender, usual stool type, history of antibiotic usage
Diseases	Type 2 diabetes mellitus (E11)	k__Bacteria;p__Firmicutes;c__Clostridia;o__Clostridiales;f__Clostridiaceae;g__Unclassified;s__Clostridiaceae bacterium OM08-6BH	-0.526346	1.18859e-05	0.0144532	BMI, Age, gender, usual stool type, history of antibiotic usage
Diseases	Type 2 diabetes mellitus (E11)	k__Bacteria;p__Proteobacteria;c__Gammaproteobacteria;o__Enterobacterales;f__Enterobacteriaceae;g__Enterobacter;s__Enterobacter cloacae	0.395062	1.40745e-05	0.0171118	BMI, Age, gender, usual stool type, history of antibiotic usage
Diseases	Type 2 diabetes mellitus (E11)	k__Bacteria;p__Firmicutes;c__Clostridia;o__Clostridiales;f__Ruminococcaceae;g__Flavonifractor;s__Flavonifractor plautii	0.316482	1.44613e-05	0.0175796	BMI, Age, gender, usual stool type, history of antibiotic usage
Diseases	Type 2 diabetes mellitus (E11)	k__Bacteria;p__Firmicutes;c__Unclassified;o__Unclassified;f__Unclassified;g__Unclassified;s__Firmicutes bacterium CAG:24	-0.699907	1.72092e-05	0.0209042	BMI, Age, gender, usual stool type, history of antibiotic usage
Diseases	Type 2 diabetes mellitus (E11)	k__Bacteria;p__Firmicutes;c__Clostridia;o__Clostridiales;f__Clostridiaceae;g__Hungatella;s__Hungatella hathewayi	0.337248	2.96699e-05	0.0359806	BMI, Age, gender, usual stool type, history of antibiotic usage
Diseases	Type 2 diabetes mellitus (E11)	k__Bacteria;p__Proteobacteria;c__Gammaproteobacteria;o__Enterobacterales;f__Enterobacteriaceae;g__Escherichia;s__Escherichia coli	2.02576	1.35424e-14	1.66707e-11	gender, Age_at_MBsample, BMI, usualStoolType_category, metformin
Diseases	Type 2 diabetes mellitus (E11)	k__Bacteria;p__Proteobacteria;c__Gammaproteobacteria;o__Enterobacterales;f__Enterobacteriaceae;g__Shigella;s__Shigella sonnei	1.39692	9.31735e-13	1.14603e-09	gender, Age_at_MBsample, BMI, usualStoolType_category, metformin
Diseases	Type 2 diabetes mellitus (E11)	k__Bacteria;p__Proteobacteria;c__Gammaproteobacteria;o__Enterobacterales;f__Enterobacteriaceae;g__Shigella;s__Shigella flexneri	1.56973	5.85265e-12	7.19291e-09	gender, Age_at_MBsample, BMI, usualStoolType_category, metformin
Diseases	Type 2 diabetes mellitus (E11)	k__Bacteria;p__Proteobacteria;c__Gammaproteobacteria;o__Enterobacterales;f__Enterobacteriaceae;g__Salmonella;s__Salmonella enterica	0.875789	6.41669e-09	7.87568e-06	gender, Age_at_MBsample, BMI, usualStoolType_category, metformin
Diseases	Type 2 diabetes mellitus (E11)	k__Bacteria;p__Firmicutes;c__Clostridia;o__Clostridiales;f__Unclassified;g__Unclassified;s__Clostridiales bacterium VE202-03	0.846346	8.3359e-09	1.02253e-05	gender, Age_at_MBsample, BMI, usualStoolType_category, metformin
Diseases	Type 2 diabetes mellitus (E11)	k__Bacteria;p__Proteobacteria;c__Gammaproteobacteria;o__Enterobacterales;f__Enterobacteriaceae;g__Citrobacter;s__Citrobacter koseri	1.0852	1.00194e-08	1.2288e-05	gender, Age_at_MBsample, BMI, usualStoolType_category, metformin
Diseases	Type 2 diabetes mellitus (E11)	k__Bacteria;p__Proteobacteria;c__Gammaproteobacteria;o__Enterobacterales;f__Enterobacteriaceae;g__Klebsiella;s__Klebsiella oxytoca	0.636523	5.84214e-08	7.15329e-05	gender, Age_at_MBsample, BMI, usualStoolType_category, metformin
Diseases	Type 2 diabetes mellitus (E11)	k__Bacteria;p__Firmicutes;c__Clostridia;o__Clostridiales;f__Lachnospiraceae;g__Lachnoclostridium;s__[Clostridium] clostridioforme	0.750006	5.85161e-08	7.16471e-05	gender, Age_at_MBsample, BMI, usualStoolType_category, metformin
Diseases	Type 2 diabetes mellitus (E11)	k__Bacteria;p__Firmicutes;c__Clostridia;o__Clostridiales;f__Ruminococcaceae;g__Flavonifractor;s__Flavonifractor plautii	0.48111	9.46755e-07	0.00115751	gender, Age_at_MBsample, BMI, usualStoolType_category, metformin
Diseases	Type 2 diabetes mellitus (E11)	k__Bacteria;p__Proteobacteria;c__Gammaproteobacteria;o__Enterobacterales;f__Enterobacteriaceae;g__Cronobacter;s__Cronobacter malonaticus	0.560393	1.16616e-06	0.0014246	gender, Age_at_MBsample, BMI, usualStoolType_category, metformin
Diseases	Type 2 diabetes mellitus (E11)	k__Bacteria;p__Proteobacteria;c__Gammaproteobacteria;o__Enterobacterales;f__Enterobacteriaceae;g__Enterobacter;s__Enterobacter cloacae	0.587307	1.54143e-06	0.00188221	gender, Age_at_MBsample, BMI, usualStoolType_category, metformin
Diseases	Type 2 diabetes mellitus (E11)	k__Bacteria;p__Firmicutes;c__Clostridia;o__Clostridiales;f__Clostridiaceae;g__Hungatella;s__Hungatella hathewayi	0.514562	2.24904e-06	0.00274351	gender, Age_at_MBsample, BMI, usualStoolType_category, metformin
Diseases	Type 2 diabetes mellitus (E11)	k__Bacteria;p__Firmicutes;c__Clostridia;o__Clostridiales;f__Clostridiaceae;g__Clostridium;s__Clostridium sp. ATCC BAA-442	0.606859	2.92503e-06	0.00356587	gender, Age_at_MBsample, BMI, usualStoolType_category, metformin
Diseases	Type 2 diabetes mellitus (E11)	k__Bacteria;p__Firmicutes;c__Clostridia;o__Clostridiales;f__Lachnospiraceae;g__Lachnoclostridium;s__[Clostridium] bolteae	0.566889	4.79731e-06	0.00584315	gender, Age_at_MBsample, BMI, usualStoolType_category, metformin
Diseases	Type 2 diabetes mellitus (E11)	k__Eukaryota;p__Arthropoda;c__Arachnida;o__Araneae;f__Araneidae;g__Nephila;s__Nephila clavipes	0.459586	3.30715e-05	0.0402316	gender, Age_at_MBsample, BMI, usualStoolType_category, metformin
Diseases	Ulcerative colitis (K51)	k__Bacteria;p__Firmicutes;c__Clostridia;o__Clostridiales;f__Clostridiaceae;g__Butyricicoccus;s__uncultured Butyricicoccus sp.	1.19028	5.80402e-10	7.14434e-07	BMI, Age, gender, usual stool type
Diseases	Ulcerative colitis (K51)	k__Bacteria;p__Firmicutes;c__Clostridia;o__Clostridiales;f__Ruminococcaceae;g__Flavonifractor;s__Flavonifractor plautii	1.26638	7.47671e-09	9.19513e-06	BMI, Age, gender, usual stool type
Diseases	Ulcerative colitis (K51)	k__Bacteria;p__Firmicutes;c__Clostridia;o__Clostridiales;f__Lachnospiraceae;g__Tyzzerella;s__Tyzzerella nexilis	1.30711	1.84707e-08	2.26964e-05	BMI, Age, gender, usual stool type
Diseases	Ulcerative colitis (K51)	k__Bacteria;p__Firmicutes;c__Unclassified;o__Unclassified;f__Unclassified;g__Unclassified;s__Firmicutes bacterium CAG:94	1.09513	3.51594e-08	4.31673e-05	BMI, Age, gender, usual stool type
Diseases	Ulcerative colitis (K51)	k__Bacteria;p__Firmicutes;c__Clostridia;o__Clostridiales;f__Ruminococcaceae;g__Pseudoflavonifractor;s__Pseudoflavonifractor capillosus	1.27431	1.58351e-07	0.000194218	BMI, Age, gender, usual stool type
Diseases	Ulcerative colitis (K51)	k__Bacteria;p__Firmicutes;c__Unclassified;o__Unclassified;f__Unclassified;g__Unclassified;s__Firmicutes bacterium CAG:114	1.06275	4.51423e-07	0.000553227	BMI, Age, gender, usual stool type
Diseases	Ulcerative colitis (K51)	k__Bacteria;p__Proteobacteria;c__Gammaproteobacteria;o__Pseudomonadales;f__Pseudomonadaceae;g__Pseudomonas;s__Pseudomonas putida	1.36302	1.40303e-06	0.00171713	BMI, Age, gender, usual stool type
Diseases	Ulcerative colitis (K51)	k__Eukaryota;p__Arthropoda;c__Arachnida;o__Araneae;f__Araneidae;g__Nephila;s__Nephila clavipes	1.17304	2.09214e-06	0.00255837	BMI, Age, gender, usual stool type
Diseases	Ulcerative colitis (K51)	k__Bacteria;p__Firmicutes;c__Clostridia;o__Clostridiales;f__Clostridiaceae;g__Clostridium;s__Clostridium sp. ATCC BAA-442	1.35958	2.73133e-06	0.00333704	BMI, Age, gender, usual stool type
Diseases	Ulcerative colitis (K51)	k__Bacteria;p__Firmicutes;c__Clostridia;o__Clostridiales;f__Clostridiaceae;g__Clostridium;s__Clostridium sp. M62_1	1.1916	3.43964e-06	0.00419807	BMI, Age, gender, usual stool type
Diseases	Ulcerative colitis (K51)	k__Bacteria;p__Firmicutes;c__Clostridia;o__Clostridiales;f__Ruminococcaceae;g__Unclassified;s__Ruminococcaceae bacterium AM28-23LB	1.18608	3.89137e-06	0.00474704	BMI, Age, gender, usual stool type
Diseases	Ulcerative colitis (K51)	k__Bacteria;p__Firmicutes;c__Clostridia;o__Clostridiales;f__Unclassified;g__Unclassified;s__Clostridiales bacterium VE202-03	1.4957	5.35517e-06	0.00652397	BMI, Age, gender, usual stool type
Diseases	Ulcerative colitis (K51)	k__Bacteria;p__Proteobacteria;c__Gammaproteobacteria;o__Enterobacterales;f__Enterobacteriaceae;g__Cronobacter;s__Cronobacter malonaticus	1.15746	7.02296e-06	0.00854483	BMI, Age, gender, usual stool type
Diseases	Ulcerative colitis (K51)	k__Bacteria;p__Firmicutes;c__Clostridia;o__Clostridiales;f__Clostridiaceae;g__Clostridium;s__Clostridium sp. AM34-11AC	1.80078	8.10942e-06	0.00986384	BMI, Age, gender, usual stool type
Diseases	Ulcerative colitis (K51)	k__Bacteria;p__Proteobacteria;c__Betaproteobacteria;o__Neisseriales;f__Neisseriaceae;g__Neisseria;s__Neisseria sp. HMSC06F02	1.11067	1.00737e-05	0.0122358	BMI, Age, gender, usual stool type
Diseases	Ulcerative colitis (K51)	k__Bacteria;p__Firmicutes;c__Clostridia;o__Clostridiales;f__Clostridiaceae;g__Clostridium;s__Clostridium sp. SN20	1.32215	1.20712e-05	0.0146509	BMI, Age, gender, usual stool type
Diseases	Ulcerative colitis (K51)	k__Bacteria;p__Firmicutes;c__Clostridia;o__Clostridiales;f__Peptostreptococcaceae;g__Clostridioides;s__Clostridioides difficile	0.873218	1.36076e-05	0.0165105	BMI, Age, gender, usual stool type
Diseases	Ulcerative colitis (K51)	k__Bacteria;p__Firmicutes;c__Clostridia;o__Clostridiales;f__Lachnospiraceae;g__Lachnoclostridium;s__[Clostridium] bolteae	1.20284	1.48116e-05	0.0179601	BMI, Age, gender, usual stool type
Diseases	Ulcerative colitis (K51)	k__Bacteria;p__Firmicutes;c__Clostridia;o__Clostridiales;f__Lachnospiraceae;g__Lachnoclostridium;s__[Clostridium] clostridioforme	1.32787	1.92655e-05	0.0233252	BMI, Age, gender, usual stool type
Diseases	Ulcerative colitis (K51)	k__Bacteria;p__Firmicutes;c__Clostridia;o__Clostridiales;f__Clostridiaceae;g__Clostridium;s__Clostridium sp. CAG:81	1.41649	1.93189e-05	0.0233871	BMI, Age, gender, usual stool type
Diseases	Ulcerative colitis (K51)	k__Bacteria;p__Proteobacteria;c__Gammaproteobacteria;o__Enterobacterales;f__Enterobacteriaceae;g__Klebsiella;s__Klebsiella oxytoca	1.09155	3.26369e-05	0.0394044	BMI, Age, gender, usual stool type
Diseases	Ulcerative colitis (K51)	k__Bacteria;p__Firmicutes;c__Clostridia;o__Clostridiales;f__Clostridiaceae;g__Butyricicoccus;s__uncultured Butyricicoccus sp.	1.18879	4.5714e-10	5.6271e-07	BMI, Age, gender, usual stool type, history of antibiotic usage
Diseases	Ulcerative colitis (K51)	k__Bacteria;p__Firmicutes;c__Clostridia;o__Clostridiales;f__Ruminococcaceae;g__Flavonifractor;s__Flavonifractor plautii	1.26488	6.42465e-09	7.90133e-06	BMI, Age, gender, usual stool type, history of antibiotic usage
Diseases	Ulcerative colitis (K51)	k__Bacteria;p__Firmicutes;c__Clostridia;o__Clostridiales;f__Lachnospiraceae;g__Tyzzerella;s__Tyzzerella nexilis	1.30566	1.64849e-08	2.02564e-05	BMI, Age, gender, usual stool type, history of antibiotic usage
Diseases	Ulcerative colitis (K51)	k__Bacteria;p__Firmicutes;c__Unclassified;o__Unclassified;f__Unclassified;g__Unclassified;s__Firmicutes bacterium CAG:94	1.09419	3.3351e-08	4.09464e-05	BMI, Age, gender, usual stool type, history of antibiotic usage
Diseases	Ulcerative colitis (K51)	k__Bacteria;p__Firmicutes;c__Clostridia;o__Clostridiales;f__Ruminococcaceae;g__Pseudoflavonifractor;s__Pseudoflavonifractor capillosus	1.27239	1.33263e-07	0.00016345	BMI, Age, gender, usual stool type, history of antibiotic usage
Diseases	Ulcerative colitis (K51)	k__Bacteria;p__Firmicutes;c__Unclassified;o__Unclassified;f__Unclassified;g__Unclassified;s__Firmicutes bacterium CAG:114	1.06189	4.39358e-07	0.000538437	BMI, Age, gender, usual stool type, history of antibiotic usage
Diseases	Ulcerative colitis (K51)	k__Bacteria;p__Proteobacteria;c__Gammaproteobacteria;o__Pseudomonadales;f__Pseudomonadaceae;g__Pseudomonas;s__Pseudomonas putida	1.36164	1.34704e-06	0.00164849	BMI, Age, gender, usual stool type, history of antibiotic usage
Diseases	Ulcerative colitis (K51)	k__Eukaryota;p__Arthropoda;c__Arachnida;o__Araneae;f__Araneidae;g__Nephila;s__Nephila clavipes	1.1714	1.91326e-06	0.00233975	BMI, Age, gender, usual stool type, history of antibiotic usage
Diseases	Ulcerative colitis (K51)	k__Bacteria;p__Firmicutes;c__Clostridia;o__Clostridiales;f__Clostridiaceae;g__Clostridium;s__Clostridium sp. ATCC BAA-442	1.35728	2.38387e-06	0.00291309	BMI, Age, gender, usual stool type, history of antibiotic usage
Diseases	Ulcerative colitis (K51)	k__Bacteria;p__Firmicutes;c__Clostridia;o__Clostridiales;f__Clostridiaceae;g__Clostridium;s__Clostridium sp. M62_1	1.19023	3.27763e-06	0.00400031	BMI, Age, gender, usual stool type, history of antibiotic usage
Diseases	Ulcerative colitis (K51)	k__Bacteria;p__Firmicutes;c__Clostridia;o__Clostridiales;f__Ruminococcaceae;g__Unclassified;s__Ruminococcaceae bacterium AM28-23LB	1.18617	3.90558e-06	0.00476318	BMI, Age, gender, usual stool type, history of antibiotic usage
Diseases	Ulcerative colitis (K51)	k__Bacteria;p__Firmicutes;c__Clostridia;o__Clostridiales;f__Unclassified;g__Unclassified;s__Clostridiales bacterium VE202-03	1.49399	5.12869e-06	0.00624823	BMI, Age, gender, usual stool type, history of antibiotic usage
Diseases	Ulcerative colitis (K51)	k__Bacteria;p__Proteobacteria;c__Gammaproteobacteria;o__Enterobacterales;f__Enterobacteriaceae;g__Cronobacter;s__Cronobacter malonaticus	1.15557	6.34296e-06	0.00771823	BMI, Age, gender, usual stool type, history of antibiotic usage
Diseases	Ulcerative colitis (K51)	k__Bacteria;p__Firmicutes;c__Clostridia;o__Clostridiales;f__Clostridiaceae;g__Clostridium;s__Clostridium sp. AM34-11AC	1.79945	8.04856e-06	0.00978711	BMI, Age, gender, usual stool type, history of antibiotic usage
Diseases	Ulcerative colitis (K51)	k__Bacteria;p__Proteobacteria;c__Betaproteobacteria;o__Neisseriales;f__Neisseriaceae;g__Neisseria;s__Neisseria sp. HMSC06F02	1.10976	9.96149e-06	0.012094	BMI, Age, gender, usual stool type, history of antibiotic usage
Diseases	Ulcerative colitis (K51)	k__Bacteria;p__Firmicutes;c__Clostridia;o__Clostridiales;f__Clostridiaceae;g__Clostridium;s__Clostridium sp. SN20	1.31995	1.09718e-05	0.0133155	BMI, Age, gender, usual stool type, history of antibiotic usage
Diseases	Ulcerative colitis (K51)	k__Bacteria;p__Firmicutes;c__Clostridia;o__Clostridiales;f__Peptostreptococcaceae;g__Clostridioides;s__Clostridioides difficile	0.871207	1.11304e-05	0.0135111	BMI, Age, gender, usual stool type, history of antibiotic usage
Diseases	Ulcerative colitis (K51)	k__Bacteria;p__Firmicutes;c__Clostridia;o__Clostridiales;f__Lachnospiraceae;g__Lachnoclostridium;s__[Clostridium] bolteae	1.2004	1.28003e-05	0.0155243	BMI, Age, gender, usual stool type, history of antibiotic usage
Diseases	Ulcerative colitis (K51)	k__Bacteria;p__Firmicutes;c__Clostridia;o__Clostridiales;f__Lachnospiraceae;g__Lachnoclostridium;s__[Clostridium] clostridioforme	1.32501	1.64473e-05	0.0199181	BMI, Age, gender, usual stool type, history of antibiotic usage
Diseases	Ulcerative colitis (K51)	k__Bacteria;p__Firmicutes;c__Clostridia;o__Clostridiales;f__Clostridiaceae;g__Clostridium;s__Clostridium sp. CAG:81	1.41421	1.78767e-05	0.0216404	BMI, Age, gender, usual stool type, history of antibiotic usage
Diseases	Ulcerative colitis (K51)	k__Bacteria;p__Proteobacteria;c__Gammaproteobacteria;o__Enterobacterales;f__Enterobacteriaceae;g__Klebsiella;s__Klebsiella oxytoca	1.0901	3.13516e-05	0.0378472	BMI, Age, gender, usual stool type, history of antibiotic usage
Diseases	Vitamin B12 deficiency anemia (D51)	k__Bacteria;p__Firmicutes;c__Bacilli;o__Lactobacillales;f__Streptococcaceae;g__Streptococcus;s__Streptococcus salivarius	1.67666	1.29639e-06	0.00159572	BMI, Age, gender, usual stool type
Diseases	Vitamin B12 deficiency anemia (D51)	k__Bacteria;p__Firmicutes;c__Clostridia;o__Clostridiales;f__Unclassified;g__Unclassified;s__butyrate-producing bacterium SS3_4	0.891461	2.93484e-06	0.00360763	BMI, Age, gender, usual stool type
Diseases	Vitamin B12 deficiency anemia (D51)	k__Bacteria;p__Firmicutes;c__Clostridia;o__Clostridiales;f__Clostridiaceae;g__Clostridium;s__Clostridium sp. CAG:81	0.735343	3.10865e-06	0.00382116	BMI, Age, gender, usual stool type
Diseases	Vitamin B12 deficiency anemia (D51)	k__Bacteria;p__Proteobacteria;c__Gammaproteobacteria;o__Enterobacterales;f__Enterobacteriaceae;g__Escherichia;s__Escherichia coli	1.29445	4.88714e-06	0.00600183	BMI, Age, gender, usual stool type
Diseases	Vitamin B12 deficiency anemia (D51)	k__Bacteria;p__Firmicutes;c__Negativicutes;o__Veillonellales;f__Veillonellaceae;g__Veillonella;s__Veillonella parvula	1.62076	9.34618e-06	0.0114669	BMI, Age, gender, usual stool type
Diseases	Vitamin B12 deficiency anemia (D51)	k__Bacteria;p__Proteobacteria;c__Gammaproteobacteria;o__Enterobacterales;f__Enterobacteriaceae;g__Shigella;s__Shigella sonnei	0.91015	1.41109e-05	0.0173008	BMI, Age, gender, usual stool type
Diseases	Vitamin B12 deficiency anemia (D51)	k__Bacteria;p__Firmicutes;c__Bacilli;o__Lactobacillales;f__Streptococcaceae;g__Streptococcus;s__Streptococcus salivarius	1.66664	1.46888e-06	0.00180804	BMI, Age, gender, usual stool type, history of antibiotic usage
Diseases	Vitamin B12 deficiency anemia (D51)	k__Bacteria;p__Firmicutes;c__Clostridia;o__Clostridiales;f__Unclassified;g__Unclassified;s__butyrate-producing bacterium SS3_4	0.887299	3.23786e-06	0.00398071	BMI, Age, gender, usual stool type, history of antibiotic usage
Diseases	Vitamin B12 deficiency anemia (D51)	k__Bacteria;p__Firmicutes;c__Clostridia;o__Clostridiales;f__Clostridiaceae;g__Clostridium;s__Clostridium sp. CAG:81	0.725142	3.76288e-06	0.00462489	BMI, Age, gender, usual stool type, history of antibiotic usage
Diseases	Vitamin B12 deficiency anemia (D51)	k__Bacteria;p__Proteobacteria;c__Gammaproteobacteria;o__Enterobacterales;f__Enterobacteriaceae;g__Escherichia;s__Escherichia coli	1.27976	5.81293e-06	0.0071386	BMI, Age, gender, usual stool type, history of antibiotic usage
Diseases	Vitamin B12 deficiency anemia (D51)	k__Bacteria;p__Firmicutes;c__Negativicutes;o__Veillonellales;f__Veillonellaceae;g__Veillonella;s__Veillonella parvula	1.60817	1.06712e-05	0.0130928	BMI, Age, gender, usual stool type, history of antibiotic usage
Diseases	Vitamin B12 deficiency anemia (D51)	k__Bacteria;p__Proteobacteria;c__Gammaproteobacteria;o__Enterobacterales;f__Enterobacteriaceae;g__Shigella;s__Shigella sonnei	0.895038	1.7119e-05	0.0209884	BMI, Age, gender, usual stool type, history of antibiotic usage
Medications	Agomelatine (N06AX22)	k__Bacteria;p__Firmicutes;c__Clostridia;o__Clostridiales;f__Lachnospiraceae;g__Anaerotignum;s__Anaerotignum lactatifermentans	1.43936	2.82836e-05	0.0348517	BMI, Age, gender, usual stool type
Medications	Allopurinol (M04AA01)	k__Bacteria;p__Firmicutes;c__Clostridia;o__Clostridiales;f__Clostridiaceae;g__Butyricicoccus;s__Butyricicoccus porcorum	-0.755235	3.34483e-05	0.0411897	BMI, Age, gender, usual stool type
Medications	Alprazolam (N05BA12)	k__Bacteria;p__Firmicutes;c__Clostridia;o__Clostridiales;f__Clostridiaceae;g__Clostridium;s__Clostridium botulinum	-0.669564	9.40554e-06	0.0115772	BMI, Age, gender, usual stool type
Medications	Alprazolam (N05BA12)	k__Bacteria;p__Bacteroidetes;c__Bacteroidia;o__Bacteroidales;f__Bacteroidaceae;g__Bacteroides;s__Bacteroides sp. CAG:1076	1.31882	1.90048e-05	0.0233746	BMI, Age, gender, usual stool type
Medications	Aminosalicylic acid and similar agents (A07EC)	k__Bacteria;p__Proteobacteria;c__Gammaproteobacteria;o__Enterobacterales;f__Enterobacteriaceae;g__Cronobacter;s__Cronobacter malonaticus	0.840319	1.00254e-05	0.0123575	BMI, Age, gender, usual stool type
Medications	Aminosalicylic acid and similar agents (A07EC)	k__Bacteria;p__Proteobacteria;c__Gammaproteobacteria;o__Enterobacterales;f__Enterobacteriaceae;g__Klebsiella;s__Klebsiella oxytoca	0.815666	3.07543e-05	0.037857	BMI, Age, gender, usual stool type
Medications	Aminosalicylic acid and similar agents (A07EC)	k__Bacteria;p__Firmicutes;c__Unclassified;o__Unclassified;f__Unclassified;g__Unclassified;s__Firmicutes bacterium CAG:94	0.62303	3.6739e-05	0.0451999	BMI, Age, gender, usual stool type
Medications	Amlodipine (C08CA01)	k__Bacteria;p__Proteobacteria;c__Betaproteobacteria;o__Burkholderiales;f__Sutterellaceae;g__Parasutterella;s__Parasutterella excrementihominis CAG:233	1.29986	3.11341e-05	0.0383243	BMI, Age, gender, usual stool type
Medications	Antiinfectives and antiseptics, excl. combinations with corticosteroids (G01A)	k__Bacteria;p__Proteobacteria;c__Gammaproteobacteria;o__Enterobacterales;f__Enterobacteriaceae;g__Cronobacter;s__Cronobacter malonaticus	0.824965	1.24512e-05	0.0153269	BMI, Age, gender, usual stool type
Medications	Blood glucose lowering drugs, excl. insulins (A10B)	k__Bacteria;p__Proteobacteria;c__Gammaproteobacteria;o__Enterobacterales;f__Enterobacteriaceae;g__Escherichia;s__Escherichia coli	2.57652	1.27837e-09	1.57332e-06	BMI, Age, gender, usual stool type
Medications	Blood glucose lowering drugs, excl. insulins (A10B)	k__Bacteria;p__Firmicutes;c__Clostridia;o__Clostridiales;f__Lachnospiraceae;g__Lachnoclostridium;s__[Clostridium] bolteae	1.08692	4.05839e-08	4.98846e-05	BMI, Age, gender, usual stool type
Medications	Blood glucose lowering drugs, excl. insulins (A10B)	k__Bacteria;p__Firmicutes;c__Clostridia;o__Clostridiales;f__Unclassified;g__Unclassified;s__Clostridiales bacterium VE202-03	1.24489	1.13966e-07	0.0001399	BMI, Age, gender, usual stool type
Medications	Blood glucose lowering drugs, excl. insulins (A10B)	k__Bacteria;p__Proteobacteria;c__Gammaproteobacteria;o__Enterobacterales;f__Enterobacteriaceae;g__Shigella;s__Shigella sonnei	1.58298	4.81594e-07	0.000590271	BMI, Age, gender, usual stool type
Medications	Blood glucose lowering drugs, excl. insulins (A10B)	k__Bacteria;p__Proteobacteria;c__Gammaproteobacteria;o__Enterobacterales;f__Enterobacteriaceae;g__Shigella;s__Shigella flexneri	1.76425	1.43625e-06	0.00175725	BMI, Age, gender, usual stool type
Medications	Blood glucose lowering drugs, excl. insulins (A10B)	k__Bacteria;p__Firmicutes;c__Clostridia;o__Clostridiales;f__Clostridiaceae;g__Unclassified;s__Clostridiaceae bacterium OM08-6BH	-1.26163	1.58107e-06	0.00193155	BMI, Age, gender, usual stool type
Medications	Blood glucose lowering drugs, excl. insulins (A10B)	k__Bacteria;p__Firmicutes;c__Clostridia;o__Clostridiales;f__Peptostreptococcaceae;g__Paeniclostridium;s__Paeniclostridium sordellii	-2.40224	2.93311e-06	0.00357581	BMI, Age, gender, usual stool type
Medications	Blood glucose lowering drugs, excl. insulins (A10B)	k__Bacteria;p__Firmicutes;c__Clostridia;o__Clostridiales;f__Lachnospiraceae;g__Lachnoclostridium;s__[Clostridium] clostridioforme	1.02726	3.64353e-06	0.00444956	BMI, Age, gender, usual stool type
Medications	Blood glucose lowering drugs, excl. insulins (A10B)	k__Bacteria;p__Firmicutes;c__Clostridia;o__Clostridiales;f__Peptostreptococcaceae;g__Romboutsia;s__Romboutsia timonensis	-2.46942	2.23616e-05	0.0271906	BMI, Age, gender, usual stool type
Medications	Blood glucose lowering drugs, excl. insulins (A10B)	k__Bacteria;p__Firmicutes;c__Clostridia;o__Clostridiales;f__Ruminococcaceae;g__Ruminococcus;s__Ruminococcus sp. AF37-20	-2.64818	2.39281e-05	0.0288898	BMI, Age, gender, usual stool type
Medications	Blood glucose lowering drugs, excl. insulins (A10B)	k__Bacteria;p__Firmicutes;c__Clostridia;o__Clostridiales;f__Ruminococcaceae;g__Ruminococcus;s__Ruminococcus sp. AM28-13	-3.08601	2.92543e-05	0.0353566	BMI, Age, gender, usual stool type
Medications	Corticosteroids, combinations with antiseptics (D07B)	k__Eukaryota;p__Ascomycota;c__Sordariomycetes;o__Glomerellales;f__Plectosphaerellaceae;g__Verticillium;s__Verticillium longisporum	1.35454	1.49554e-05	0.0184395	BMI, Age, gender, usual stool type
Medications	Dihydropyridine derivatives (C08CA)	k__Bacteria;p__Bacteroidetes;c__Bacteroidia;o__Bacteroidales;f__Bacteroidaceae;g__Bacteroides;s__Bacteroides gallinarum	2.68879	1.63209e-06	0.00200871	BMI, Age, gender, usual stool type
Medications	Dihydropyridine derivatives (C08CA)	k__Bacteria;p__Firmicutes;c__Clostridia;o__Clostridiales;f__Lachnospiraceae;g__Anaerotignum;s__Anaerotignum lactatifermentans	1.73369	4.58281e-06	0.00563524	BMI, Age, gender, usual stool type
Medications	Esomeprazole (A02BC05)	k__Bacteria;p__Firmicutes;c__Bacilli;o__Lactobacillales;f__Streptococcaceae;g__Streptococcus;s__Streptococcus parasanguinis	1.2163	5.12954e-08	6.31446e-05	BMI, Age, gender, usual stool type
Medications	Esomeprazole (A02BC05)	k__Bacteria;p__Firmicutes;c__Bacilli;o__Lactobacillales;f__Streptococcaceae;g__Streptococcus;s__Streptococcus salivarius	1.48531	1.41597e-06	0.00174164	BMI, Age, gender, usual stool type
Medications	Esomeprazole (A02BC05)	k__Bacteria;p__Firmicutes;c__Negativicutes;o__Veillonellales;f__Veillonellaceae;g__Veillonella;s__Veillonella parvula	1.39365	1.78526e-05	0.0219404	BMI, Age, gender, usual stool type
Medications	Fluticasone furoate (R01AD12)	k__Bacteria;p__Firmicutes;c__Clostridia;o__Clostridiales;f__Lachnospiraceae;g__Coprococcus;s__Coprococcus comes	1.09258	8.70557e-06	0.0107166	BMI, Age, gender, usual stool type
Medications	Gabapentin (N03AX12)	k__Bacteria;p__Firmicutes;c__Clostridia;o__Clostridiales;f__Ruminococcaceae;g__Ruminococcus;s__Ruminococcus sp. AF18-29	-3.66393	4.40483e-06	0.00533257	BMI, Age, gender, usual stool type
Medications	Gabapentin (N03AX12)	k__Bacteria;p__Firmicutes;c__Clostridia;o__Clostridiales;f__Ruminococcaceae;g__Ruminococcus;s__Ruminococcus sp. HUN007	-2.47641	5.69505e-06	0.00690592	BMI, Age, gender, usual stool type
Medications	Gabapentin (N03AX12)	k__Bacteria;p__Firmicutes;c__Clostridia;o__Clostridiales;f__Ruminococcaceae;g__Ruminococcus;s__Ruminococcus albus	-1.56171	5.91953e-06	0.00725245	BMI, Age, gender, usual stool type
Medications	Gabapentin (N03AX12)	k__Bacteria;p__Bacteroidetes;c__Bacteroidia;o__Bacteroidales;f__Prevotellaceae;g__Prevotella;s__Prevotella sp. CAG:485	1.3438	6.27279e-06	0.00769337	BMI, Age, gender, usual stool type
Medications	Gabapentin (N03AX12)	k__Bacteria;p__Firmicutes;c__Clostridia;o__Clostridiales;f__Oscillospiraceae;g__Oscillibacter;s__Oscillibacter sp. KLE 1728	1.46505	1.55534e-05	0.0190324	BMI, Age, gender, usual stool type
Medications	Gabapentin (N03AX12)	k__Bacteria;p__Proteobacteria;c__Gammaproteobacteria;o__Vibrionales;f__Vibrionaceae;g__Vibrio;s__Vibrio cholerae	1.13479	1.73631e-05	0.0212372	BMI, Age, gender, usual stool type
Medications	Gabapentin (N03AX12)	k__Bacteria;p__Firmicutes;c__Clostridia;o__Clostridiales;f__Unclassified;g__Lawsonibacter;s__Lawsonibacter asaccharolyticus	1.12578	2.85417e-05	0.0348236	BMI, Age, gender, usual stool type
Medications	Gabapentin (N03AX12)	k__Bacteria;p__Proteobacteria;c__Betaproteobacteria;o__Burkholderiales;f__Burkholderiaceae;g__Ralstonia;s__Ralstonia solanacearum	0.936695	2.88832e-05	0.0352275	BMI, Age, gender, usual stool type
Medications	Gabapentin (N03AX12)	k__Bacteria;p__Bacteroidetes;c__Bacteroidia;o__Bacteroidales;f__Tannerellaceae;g__Parabacteroides;s__Parabacteroides merdae CAG:48	1.44075	3.80863e-05	0.0463654	BMI, Age, gender, usual stool type
Medications	Glucocorticoids (H02AB)	k__Bacteria;p__Firmicutes;c__Clostridia;o__Clostridiales;f__Lachnospiraceae;g__Blautia;s__Blautia sp. CAG:237	1.13403	2.23238e-06	0.00274655	BMI, Age, gender, usual stool type
Medications	Glucocorticoids (H02AB)	k__Bacteria;p__Bacteroidetes;c__Bacteroidia;o__Bacteroidales;f__Bacteroidaceae;g__Bacteroides;s__Bacteroides sp. AF29-11	1.99294	9.0035e-06	0.0110613	BMI, Age, gender, usual stool type
Medications	Glucocorticoids (H02AB)	k__Bacteria;p__Bacteroidetes;c__Bacteroidia;o__Bacteroidales;f__Bacteroidaceae;g__Bacteroides;s__Bacteroides sp. D20	1.76481	1.37456e-05	0.0168684	BMI, Age, gender, usual stool type
Medications	Glucocorticoids (H02AB)	k__Bacteria;p__Firmicutes;c__Clostridia;o__Clostridiales;f__Lachnospiraceae;g__Blautia;s__Blautia wexlerae	0.761744	1.89024e-05	0.0231752	BMI, Age, gender, usual stool type
Medications	Glucocorticoids (H02AB)	k__Bacteria;p__Firmicutes;c__Erysipelotrichia;o__Erysipelotrichales;f__Erysipelotrichaceae;g__Coprobacillus;s__Coprobacillus sp. CAG:698	-3.17849	2.14634e-05	0.0260977	BMI, Age, gender, usual stool type
Medications	Glucocorticoids (H02AB)	k__Bacteria;p__Bacteroidetes;c__Bacteroidia;o__Bacteroidales;f__Bacteroidaceae;g__Bacteroides;s__Bacteroides uniformis	1.41743	3.34968e-05	0.0410047	BMI, Age, gender, usual stool type
Medications	Insulins and analogues for injection, long-acting (A10AE)	k__Bacteria;p__Proteobacteria;c__Gammaproteobacteria;o__Enterobacterales;f__Enterobacteriaceae;g__Escherichia;s__Escherichia coli	2.95175	1.91572e-08	2.36149e-05	BMI, Age, gender, usual stool type
Medications	Insulins and analogues for injection, long-acting (A10AE)	k__Bacteria;p__Proteobacteria;c__Gammaproteobacteria;o__Enterobacterales;f__Enterobacteriaceae;g__Shigella;s__Shigella sonnei	1.82748	2.3817e-06	0.00292954	BMI, Age, gender, usual stool type
Medications	Insulins and analogues for injection, long-acting (A10AE)	k__Bacteria;p__Proteobacteria;c__Gammaproteobacteria;o__Enterobacterales;f__Enterobacteriaceae;g__Cronobacter;s__Cronobacter malonaticus	1.01976	6.68169e-06	0.00820134	BMI, Age, gender, usual stool type
Medications	Insulins and analogues for injection, long-acting (A10AE)	k__Bacteria;p__Proteobacteria;c__Gammaproteobacteria;o__Enterobacterales;f__Enterobacteriaceae;g__Shigella;s__Shigella flexneri	2.00721	9.44859e-06	0.0115926	BMI, Age, gender, usual stool type
Medications	Insulins and analogues for injection, long-acting (A10AE)	k__Bacteria;p__Firmicutes;c__Clostridia;o__Clostridiales;f__Clostridiaceae;g__Clostridium;s__Clostridium sp. CAG:62_40_43	-2.97306	4.07522e-05	0.0498307	BMI, Age, gender, usual stool type
Medications	Mebeverine (A03AA04)	k__Bacteria;p__Proteobacteria;c__Gammaproteobacteria;o__Enterobacterales;f__Enterobacteriaceae;g__Escherichia;s__Escherichia coli	2.02131	7.56469e-06	0.0093119	BMI, Age, gender, usual stool type
Medications	Mebeverine (A03AA04)	k__Bacteria;p__Proteobacteria;c__Gammaproteobacteria;o__Enterobacterales;f__Enterobacteriaceae;g__Shigella;s__Shigella sonnei	1.38187	3.53915e-05	0.0435246	BMI, Age, gender, usual stool type
Medications	Metformin (A10BA02)	k__Bacteria;p__Proteobacteria;c__Gammaproteobacteria;o__Enterobacterales;f__Enterobacteriaceae;g__Escherichia;s__Escherichia coli	1.53267	9.22587e-09	1.13513e-05	BMI, Age, gender, usual stool type
Medications	Metformin (A10BA02)	k__Bacteria;p__Firmicutes;c__Clostridia;o__Clostridiales;f__Peptostreptococcaceae;g__Romboutsia;s__Romboutsia timonensis	-2.04655	2.22071e-08	2.73001e-05	BMI, Age, gender, usual stool type
Medications	Metformin (A10BA02)	k__Bacteria;p__Firmicutes;c__Clostridia;o__Clostridiales;f__Peptostreptococcaceae;g__Intestinibacter;s__Intestinibacter bartlettii	-1.58791	3.92995e-08	4.83023e-05	BMI, Age, gender, usual stool type
Medications	Metformin (A10BA02)	k__Bacteria;p__Firmicutes;c__Clostridia;o__Clostridiales;f__Ruminococcaceae;g__Ruminococcus;s__Ruminococcus sp. AF37-20	-1.80998	9.95648e-07	0.00122209	BMI, Age, gender, usual stool type
Medications	Metformin (A10BA02)	k__Bacteria;p__Firmicutes;c__Clostridia;o__Clostridiales;f__Clostridiaceae;g__Unclassified;s__Clostridiaceae bacterium OM08-6BH	-0.7532	2.81948e-06	0.00345916	BMI, Age, gender, usual stool type
Medications	Metformin (A10BA02)	k__Bacteria;p__Firmicutes;c__Clostridia;o__Clostridiales;f__Lachnospiraceae;g__Lachnoclostridium;s__[Clostridium] clostridioforme	0.580741	3.10869e-05	0.0380588	BMI, Age, gender, usual stool type
Medications	Metformin (A10BA02)	k__Bacteria;p__Firmicutes;c__Clostridia;o__Clostridiales;f__Oscillospiraceae;g__Oscillibacter;s__Oscillibacter sp. 57_20	-0.91336	3.97746e-05	0.0486425	BMI, Age, gender, usual stool type
Medications	Metoprolol (C07AB02)	k__Bacteria;p__Bacteroidetes;c__Bacteroidia;o__Bacteroidales;f__Tannerellaceae;g__Parabacteroides;s__Parabacteroides sp. AM17-47	0.713361	5.53114e-10	6.80884e-07	BMI, Age, gender, usual stool type
Medications	Metoprolol (C07AB02)	k__Bacteria;p__Bacteroidetes;c__Bacteroidia;o__Bacteroidales;f__Tannerellaceae;g__Parabacteroides;s__Parabacteroides merdae CAG:48	0.648352	4.67976e-09	5.75607e-06	BMI, Age, gender, usual stool type
Medications	Metoprolol (C07AB02)	k__Bacteria;p__Bacteroidetes;c__Bacteroidia;o__Bacteroidales;f__Bacteroidaceae;g__Bacteroides;s__Bacteroides nordii	0.691333	9.61318e-09	1.18135e-05	BMI, Age, gender, usual stool type
Medications	Metoprolol (C07AB02)	k__Bacteria;p__Bacteroidetes;c__Bacteroidia;o__Bacteroidales;f__Tannerellaceae;g__Parabacteroides;s__Parabacteroides merdae	0.983939	1.21112e-08	1.48729e-05	BMI, Age, gender, usual stool type
Medications	Metoprolol (C07AB02)	k__Bacteria;p__Bacteroidetes;c__Bacteroidia;o__Bacteroidales;f__Bacteroidaceae;g__Bacteroides;s__Bacteroides sp. 3_1_23	0.749316	2.19344e-08	2.69068e-05	BMI, Age, gender, usual stool type
Medications	Metoprolol (C07AB02)	k__Bacteria;p__Firmicutes;c__Clostridia;o__Clostridiales;f__Lachnospiraceae;g__Dorea;s__Dorea sp. 42_8	0.648335	2.83796e-08	3.47762e-05	BMI, Age, gender, usual stool type
Medications	Metoprolol (C07AB02)	k__Bacteria;p__Bacteroidetes;c__Bacteroidia;o__Bacteroidales;f__Tannerellaceae;g__Tannerella;s__Tannerella sp. 6_1_58FAA_CT1	0.670774	3.41711e-08	4.18451e-05	BMI, Age, gender, usual stool type
Medications	Metoprolol (C07AB02)	k__Bacteria;p__Bacteroidetes;c__Bacteroidia;o__Bacteroidales;f__Tannerellaceae;g__Parabacteroides;s__Parabacteroides johnsonii CAG:246	0.60888	3.65086e-08	4.46882e-05	BMI, Age, gender, usual stool type
Medications	Metoprolol (C07AB02)	k__Bacteria;p__Bacteroidetes;c__Bacteroidia;o__Bacteroidales;f__Tannerellaceae;g__Parabacteroides;s__Parabacteroides sp. 20_3	0.776875	4.36591e-08	5.33948e-05	BMI, Age, gender, usual stool type
Medications	Metoprolol (C07AB02)	k__Bacteria;p__Bacteroidetes;c__Bacteroidia;o__Bacteroidales;f__Rikenellaceae;g__Alistipes;s__Alistipes finegoldii CAG:68	0.5516	6.91376e-08	8.44449e-05	BMI, Age, gender, usual stool type
Medications	Metoprolol (C07AB02)	k__Bacteria;p__Bacteroidetes;c__Cytophagia;o__Cytophagales;f__Flammeovirgaceae;g__Cesiribacter;s__Cesiribacter andamanensis	0.561045	9.9943e-08	0.000121867	BMI, Age, gender, usual stool type
Medications	Metoprolol (C07AB02)	k__Bacteria;p__Bacteroidetes;c__Bacteroidia;o__Bacteroidales;f__Bacteroidaceae;g__Bacteroides;s__Bacteroides sp. 4_3_47FAA	0.885416	1.11604e-07	0.000136086	BMI, Age, gender, usual stool type
Medications	Metoprolol (C07AB02)	k__Viruses;p__Unclassified;c__Unclassified;o__Caudovirales;f__Siphoviridae;g__Unclassified;s__Siphoviridae sp.	-1.55647	1.33249e-07	0.000161308	BMI, Age, gender, usual stool type
Medications	Metoprolol (C07AB02)	k__Bacteria;p__Bacteroidetes;c__Bacteroidia;o__Bacteroidales;f__Rikenellaceae;g__Alistipes;s__Alistipes sp. HGB5	0.78974	1.37084e-07	0.000166903	BMI, Age, gender, usual stool type
Medications	Metoprolol (C07AB02)	k__Bacteria;p__Bacteroidetes;c__Bacteroidia;o__Bacteroidales;f__Unclassified;g__Unclassified;s__Bacteroidales bacterium Barb7	0.559669	1.40109e-07	0.000170568	BMI, Age, gender, usual stool type
Medications	Metoprolol (C07AB02)	k__Bacteria;p__Proteobacteria;c__Alphaproteobacteria;o__Rhodospirillales;f__Rhodospirillaceae;g__Nitrospirillum;s__Nitrospirillum amazonense	0.371296	1.82795e-07	0.000222031	BMI, Age, gender, usual stool type
Medications	Metoprolol (C07AB02)	k__Bacteria;p__Bacteroidetes;c__Bacteroidia;o__Bacteroidales;f__Rikenellaceae;g__Alistipes;s__Alistipes sp. CHKCI003	0.572146	1.96654e-07	0.000238751	BMI, Age, gender, usual stool type
Medications	Metoprolol (C07AB02)	k__Bacteria;p__Bacteroidetes;c__Bacteroidia;o__Bacteroidales;f__Rikenellaceae;g__Alistipes;s__Alistipes sp. CAG:53	0.558578	2.05445e-07	0.000249335	BMI, Age, gender, usual stool type
Medications	Metoprolol (C07AB02)	k__Bacteria;p__Proteobacteria;c__Betaproteobacteria;o__Burkholderiales;f__Alcaligenaceae;g__Bordetella;s__Bordetella hinzii	0.423448	2.09552e-07	0.00025405	BMI, Age, gender, usual stool type
Medications	Metoprolol (C07AB02)	k__Bacteria;p__Bacteroidetes;c__Bacteroidia;o__Bacteroidales;f__Porphyromonadaceae;g__Porphyromonas;s__Porphyromonas gingivalis	0.516876	2.61335e-07	0.000316424	BMI, Age, gender, usual stool type
Medications	Metoprolol (C07AB02)	k__Bacteria;p__Bacteroidetes;c__Bacteroidia;o__Bacteroidales;f__Tannerellaceae;g__Parabacteroides;s__Parabacteroides johnsonii	0.779065	2.74447e-07	0.000332247	BMI, Age, gender, usual stool type
Medications	Metoprolol (C07AB02)	k__Bacteria;p__Proteobacteria;c__Alphaproteobacteria;o__Rhizobiales;f__Rhizobiaceae;g__Agrobacterium;s__Agrobacterium deltaense	0.410115	3.65776e-07	0.000440438	BMI, Age, gender, usual stool type
Medications	Metoprolol (C07AB02)	k__Bacteria;p__Proteobacteria;c__Betaproteobacteria;o__Rhodocyclales;f__Zoogloeaceae;g__Thauera;s__Thauera phenylacetica	0.601575	3.88576e-07	0.000467482	BMI, Age, gender, usual stool type
Medications	Metoprolol (C07AB02)	k__Bacteria;p__Bacteroidetes;c__Bacteroidia;o__Bacteroidales;f__Bacteroidaceae;g__Bacteroides;s__Bacteroides dorei	0.78391	3.87955e-07	0.00046815	BMI, Age, gender, usual stool type
Medications	Metoprolol (C07AB02)	k__Bacteria;p__Proteobacteria;c__Gammaproteobacteria;o__Pseudomonadales;f__Moraxellaceae;g__Acinetobacter;s__Acinetobacter baumannii	0.386569	3.95843e-07	0.000477045	BMI, Age, gender, usual stool type
Medications	Metoprolol (C07AB02)	k__Bacteria;p__Unclassified;c__Unclassified;o__Unclassified;f__Unclassified;g__Unclassified;s__bacterium HR39	0.396902	4.30655e-07	0.000517071	BMI, Age, gender, usual stool type
Medications	Metoprolol (C07AB02)	k__Bacteria;p__Bacteroidetes;c__Bacteroidia;o__Bacteroidales;f__Unclassified;g__Unclassified;s__Bacteroidales bacterium Barb6XT	0.577526	4.32767e-07	0.00052082	BMI, Age, gender, usual stool type
Medications	Metoprolol (C07AB02)	k__Bacteria;p__Bacteroidetes;c__Bacteroidia;o__Bacteroidales;f__Tannerellaceae;g__Parabacteroides;s__Parabacteroides distasonis	0.623967	4.55175e-07	0.000547308	BMI, Age, gender, usual stool type
Medications	Metoprolol (C07AB02)	k__Bacteria;p__Proteobacteria;c__Betaproteobacteria;o__Burkholderiales;f__Alcaligenaceae;g__Bordetella;s__Bordetella pertussis	0.360767	4.63505e-07	0.000556925	BMI, Age, gender, usual stool type
Medications	Metoprolol (C07AB02)	k__Bacteria;p__Bacteroidetes;c__Bacteroidia;o__Bacteroidales;f__Bacteroidaceae;g__Bacteroides;s__Bacteroides sp. 3_1_40A	0.805207	4.71889e-07	0.000566731	BMI, Age, gender, usual stool type
Medications	Metoprolol (C07AB02)	k__Bacteria;p__Bacteroidetes;c__Bacteroidia;o__Bacteroidales;f__Bacteroidaceae;g__Bacteroides;s__Bacteroides caccae CAG:21	0.60822	4.7685e-07	0.00057253	BMI, Age, gender, usual stool type
Medications	Metoprolol (C07AB02)	k__Bacteria;p__Unclassified;c__Unclassified;o__Unclassified;f__Unclassified;g__Unclassified;s__uncultured bacterium MedeBAC46A06	0.797516	4.80966e-07	0.000577326	BMI, Age, gender, usual stool type
Medications	Metoprolol (C07AB02)	k__Bacteria;p__Bacteroidetes;c__Bacteroidia;o__Bacteroidales;f__Rikenellaceae;g__Alistipes;s__Alistipes putredinis CAG:67	0.788677	4.94103e-07	0.000592676	BMI, Age, gender, usual stool type
Medications	Metoprolol (C07AB02)	k__Bacteria;p__Bacteroidetes;c__Bacteroidia;o__Bacteroidales;f__Tannerellaceae;g__Parabacteroides;s__Parabacteroides sp. D13	0.667028	5.07719e-07	0.000608731	BMI, Age, gender, usual stool type
Medications	Metoprolol (C07AB02)	k__Bacteria;p__Bacteroidetes;c__Bacteroidia;o__Bacteroidales;f__Tannerellaceae;g__Parabacteroides;s__Parabacteroides sp. CAG:2	0.672718	5.17965e-07	0.000620923	BMI, Age, gender, usual stool type
Medications	Metoprolol (C07AB02)	k__Bacteria;p__Proteobacteria;c__Betaproteobacteria;o__Burkholderiales;f__Comamonadaceae;g__Hydrogenophaga;s__Hydrogenophaga sp. T4	0.376705	5.42059e-07	0.000649309	BMI, Age, gender, usual stool type
Medications	Metoprolol (C07AB02)	k__Bacteria;p__Bacteroidetes;c__Bacteroidia;o__Bacteroidales;f__Porphyromonadaceae;g__Porphyromonas;s__Porphyromonas sp. 31_2	0.776822	5.51427e-07	0.000660404	BMI, Age, gender, usual stool type
Medications	Metoprolol (C07AB02)	k__Bacteria;p__Proteobacteria;c__Gammaproteobacteria;o__Xanthomonadales;f__Xanthomonadaceae;g__Stenotrophomonas;s__Stenotrophomonas maltophilia	0.422542	7.74376e-07	0.000922143	BMI, Age, gender, usual stool type
Medications	Metoprolol (C07AB02)	k__Bacteria;p__Bacteroidetes;c__Bacteroidia;o__Bacteroidales;f__Unclassified;g__Unclassified;s__Bacteroidales bacterium Barb6	0.545971	8.81989e-07	0.00105086	BMI, Age, gender, usual stool type
Medications	Metoprolol (C07AB02)	k__Bacteria;p__Bacteroidetes;c__Bacteroidia;o__Bacteroidales;f__Porphyromonadaceae;g__Porphyromonas;s__Porphyromonas crevioricanis	0.63584	9.07623e-07	0.00108019	BMI, Age, gender, usual stool type
Medications	Metoprolol (C07AB02)	k__Bacteria;p__Bacteroidetes;c__Bacteroidia;o__Bacteroidales;f__Rikenellaceae;g__Alistipes;s__Alistipes sp. CAG:157	0.537058	9.18959e-07	0.00109417	BMI, Age, gender, usual stool type
Medications	Metoprolol (C07AB02)	k__Bacteria;p__Bacteroidetes;c__Bacteroidia;o__Bacteroidales;f__Bacteroidaceae;g__Bacteroides;s__Bacteroides faecis CAG:32	0.652657	9.38959e-07	0.0011176	BMI, Age, gender, usual stool type
Medications	Metoprolol (C07AB02)	k__Bacteria;p__Bacteroidetes;c__Bacteroidia;o__Bacteroidales;f__Bacteroidaceae;g__Bacteroides;s__Bacteroides fragilis CAG:558	0.594575	9.77845e-07	0.00116303	BMI, Age, gender, usual stool type
Medications	Metoprolol (C07AB02)	k__Bacteria;p__Bacteroidetes;c__Bacteroidia;o__Bacteroidales;f__Bacteroidaceae;g__Bacteroides;s__Bacteroides fragilis	0.642935	1.16879e-06	0.00138611	BMI, Age, gender, usual stool type
Medications	Metoprolol (C07AB02)	k__Bacteria;p__Bacteroidetes;c__Bacteroidia;o__Bacteroidales;f__Bacteroidaceae;g__Bacteroides;s__Bacteroides ovatus	0.709245	1.17523e-06	0.00139361	BMI, Age, gender, usual stool type
Medications	Metoprolol (C07AB02)	k__Bacteria;p__Bacteroidetes;c__Bacteroidia;o__Bacteroidales;f__Bacteroidaceae;g__Bacteroides;s__Bacteroides fragilis CAG:47	0.625176	1.19183e-06	0.00141216	BMI, Age, gender, usual stool type
Medications	Metoprolol (C07AB02)	k__Bacteria;p__Proteobacteria;c__Gammaproteobacteria;o__Pseudomonadales;f__Pseudomonadaceae;g__Pseudomonas;s__Pseudomonas aeruginosa	0.284144	1.24982e-06	0.00147994	BMI, Age, gender, usual stool type
Medications	Metoprolol (C07AB02)	k__Bacteria;p__Proteobacteria;c__Betaproteobacteria;o__Burkholderiales;f__Burkholderiaceae;g__Burkholderia;s__Burkholderia pseudomallei	0.322033	1.35727e-06	0.00160484	BMI, Age, gender, usual stool type
Medications	Metoprolol (C07AB02)	k__Bacteria;p__Bacteroidetes;c__Bacteroidia;o__Bacteroidales;f__Bacteroidaceae;g__Bacteroides;s__Bacteroides sp. 1_1_14	0.812348	1.45345e-06	0.00171587	BMI, Age, gender, usual stool type
Medications	Metoprolol (C07AB02)	k__Bacteria;p__Bacteroidetes;c__Bacteroidia;o__Bacteroidales;f__Bacteroidaceae;g__Bacteroides;s__Bacteroides faecichinchillae	0.594637	1.49317e-06	0.00176172	BMI, Age, gender, usual stool type
Medications	Metoprolol (C07AB02)	k__Bacteria;p__Bacteroidetes;c__Bacteroidia;o__Bacteroidales;f__Rikenellaceae;g__Alistipes;s__Alistipes sp. CAG:29	0.666701	1.57642e-06	0.00185815	BMI, Age, gender, usual stool type
Medications	Metoprolol (C07AB02)	k__Bacteria;p__Bacteroidetes;c__Flavobacteriia;o__Flavobacteriales;f__Flavobacteriaceae;g__Ornithobacterium;s__Ornithobacterium rhinotracheale	0.565965	1.58337e-06	0.00186518	BMI, Age, gender, usual stool type
Medications	Metoprolol (C07AB02)	k__Bacteria;p__Bacteroidetes;c__Bacteroidia;o__Bacteroidales;f__Bacteroidaceae;g__Bacteroides;s__Bacteroides clarus CAG:160	0.593081	1.58784e-06	0.00187124	BMI, Age, gender, usual stool type
Medications	Metoprolol (C07AB02)	k__Bacteria;p__Bacteroidetes;c__Bacteroidia;o__Bacteroidales;f__Unclassified;g__Unclassified;s__Bacteroidales bacterium Barb4	0.507362	1.71334e-06	0.00201502	BMI, Age, gender, usual stool type
Medications	Metoprolol (C07AB02)	k__Bacteria;p__Bacteroidetes;c__Bacteroidia;o__Bacteroidales;f__Bacteroidaceae;g__Bacteroides;s__Bacteroides sp. 1_1_30	0.725239	1.76623e-06	0.00207086	BMI, Age, gender, usual stool type
Medications	Metoprolol (C07AB02)	k__Bacteria;p__Bacteroidetes;c__Bacteroidia;o__Bacteroidales;f__Bacteroidaceae;g__Bacteroides;s__Bacteroides sp. 9_1_42FAA	0.581884	1.8124e-06	0.00212881	BMI, Age, gender, usual stool type
Medications	Metoprolol (C07AB02)	k__Bacteria;p__Bacteroidetes;c__Bacteroidia;o__Bacteroidales;f__Bacteroidaceae;g__Bacteroides;s__Bacteroides thetaiotaomicron	0.674482	1.82311e-06	0.00214082	BMI, Age, gender, usual stool type
Medications	Metoprolol (C07AB02)	k__Bacteria;p__Bacteroidetes;c__Bacteroidia;o__Bacteroidales;f__Bacteroidaceae;g__Bacteroides;s__Bacteroides sp. 2_1_33B	0.704557	1.85974e-06	0.0021829	BMI, Age, gender, usual stool type
Medications	Metoprolol (C07AB02)	k__Bacteria;p__Bacteroidetes;c__Bacteroidia;o__Bacteroidales;f__Rikenellaceae;g__Alistipes;s__Alistipes sp. CAG:268	0.559827	1.97685e-06	0.0023171	BMI, Age, gender, usual stool type
Medications	Metoprolol (C07AB02)	k__Bacteria;p__Proteobacteria;c__Gammaproteobacteria;o__Pseudomonadales;f__Pseudomonadaceae;g__Pseudomonas;s__Pseudomonas syringae group genomosp. 3	0.3734	2.38402e-06	0.00278547	BMI, Age, gender, usual stool type
Medications	Metoprolol (C07AB02)	k__Bacteria;p__Proteobacteria;c__Betaproteobacteria;o__Burkholderiales;f__Burkholderiaceae;g__Burkholderia;s__Burkholderia cenocepacia	0.380307	2.3896e-06	0.00278958	BMI, Age, gender, usual stool type
Medications	Metoprolol (C07AB02)	k__Bacteria;p__Firmicutes;c__Clostridia;o__Clostridiales;f__Ruminococcaceae;g__Anaerotruncus;s__Anaerotruncus sp. CAG:390	-0.561219	2.41781e-06	0.0028236	BMI, Age, gender, usual stool type
Medications	Metoprolol (C07AB02)	k__Bacteria;p__Bacteroidetes;c__Bacteroidia;o__Bacteroidales;f__Porphyromonadaceae;g__Unclassified;s__Porphyromonadaceae bacterium KA00676	0.61095	2.70849e-06	0.0031533	BMI, Age, gender, usual stool type
Medications	Metoprolol (C07AB02)	k__Bacteria;p__Bacteroidetes;c__Bacteroidia;o__Bacteroidales;f__Bacteroidaceae;g__Bacteroides;s__Bacteroides eggerthii CAG:109	0.557857	2.73888e-06	0.00319373	BMI, Age, gender, usual stool type
Medications	Metoprolol (C07AB02)	k__Bacteria;p__Proteobacteria;c__Gammaproteobacteria;o__Chromatiales;f__Chromatiaceae;g__Thiocapsa;s__Thiocapsa sp. KS1	0.346605	2.7453e-06	0.00319799	BMI, Age, gender, usual stool type
Medications	Metoprolol (C07AB02)	k__Bacteria;p__Cyanobacteria;c__Unclassified;o__Nostocales;f__Tolypothrichaceae;g__Tolypothrix;s__Tolypothrix campylonemoides	0.317314	2.97553e-06	0.00346209	BMI, Age, gender, usual stool type
Medications	Metoprolol (C07AB02)	k__Bacteria;p__Bacteroidetes;c__Bacteroidia;o__Bacteroidales;f__Bacteroidaceae;g__Bacteroides;s__Bacteroides sartorii	0.694762	3.08247e-06	0.00358398	BMI, Age, gender, usual stool type
Medications	Metoprolol (C07AB02)	k__Bacteria;p__Bacteroidetes;c__Bacteroidia;o__Bacteroidales;f__Prevotellaceae;g__Prevotella;s__Prevotella sp. CAG:755	0.492967	3.12955e-06	0.00363791	BMI, Age, gender, usual stool type
Medications	Metoprolol (C07AB02)	k__Bacteria;p__Bacteroidetes;c__Bacteroidia;o__Bacteroidales;f__Bacteroidaceae;g__Bacteroides;s__Bacteroides sp. OM05-10AA	0.782181	3.24494e-06	0.00376667	BMI, Age, gender, usual stool type
Medications	Metoprolol (C07AB02)	k__Bacteria;p__Unclassified;c__Unclassified;o__Unclassified;f__Unclassified;g__Unclassified;s__uncultured bacterium	0.406641	3.27146e-06	0.00379845	BMI, Age, gender, usual stool type
Medications	Metoprolol (C07AB02)	k__Bacteria;p__Bacteroidetes;c__Bacteroidia;o__Bacteroidales;f__Bacteroidaceae;g__Bacteroides;s__Bacteroides vulgatus CAG:6	0.708997	3.30603e-06	0.00383641	BMI, Age, gender, usual stool type
Medications	Metoprolol (C07AB02)	k__Bacteria;p__Bacteroidetes;c__Bacteroidia;o__Bacteroidales;f__Tannerellaceae;g__Tannerella;s__Tannerella sp. CAG:51	0.628552	3.33854e-06	0.00387368	BMI, Age, gender, usual stool type
Medications	Metoprolol (C07AB02)	k__Bacteria;p__Bacteroidetes;c__Bacteroidia;o__Bacteroidales;f__Bacteroidaceae;g__Bacteroides;s__Bacteroides intestinalis CAG:564	0.595784	3.77239e-06	0.00436508	BMI, Age, gender, usual stool type
Medications	Metoprolol (C07AB02)	k__Bacteria;p__Bacteroidetes;c__Bacteroidia;o__Bacteroidales;f__Bacteroidaceae;g__Bacteroides;s__Bacteroides sp. HMSC068A09	0.850036	4.40716e-06	0.00507936	BMI, Age, gender, usual stool type
Medications	Metoprolol (C07AB02)	k__Bacteria;p__Proteobacteria;c__Deltaproteobacteria;o__Myxococcales;f__Archangiaceae;g__Stigmatella;s__Stigmatella aurantiaca	0.275001	4.46506e-06	0.00514648	BMI, Age, gender, usual stool type
Medications	Metoprolol (C07AB02)	k__Bacteria;p__Bacteroidetes;c__Bacteroidia;o__Bacteroidales;f__Bacteroidaceae;g__Bacteroides;s__Bacteroides thetaiotaomicron CAG:40	0.642049	4.57432e-06	0.00527215	BMI, Age, gender, usual stool type
Medications	Metoprolol (C07AB02)	k__Bacteria;p__Bacteroidetes;c__Bacteroidia;o__Bacteroidales;f__Prevotellaceae;g__Prevotella;s__Prevotella sp. F0091	0.493847	4.64298e-06	0.00534628	BMI, Age, gender, usual stool type
Medications	Metoprolol (C07AB02)	k__Bacteria;p__Actinobacteria;c__Actinobacteria;o__Streptomycetales;f__Streptomycetaceae;g__Streptomyces;s__Streptomyces sp. Tu6071	0.300407	4.97806e-06	0.00572338	BMI, Age, gender, usual stool type
Medications	Metoprolol (C07AB02)	k__Bacteria;p__Bacteroidetes;c__Bacteroidia;o__Bacteroidales;f__Bacteroidaceae;g__Bacteroides;s__Bacteroides sp. 2_1_22	0.735894	5.39127e-06	0.00577904	BMI, Age, gender, usual stool type
Medications	Metoprolol (C07AB02)	k__Bacteria;p__Bacteroidetes;c__Bacteroidia;o__Bacteroidales;f__Rikenellaceae;g__Alistipes;s__Alistipes putredinis	1.03992	5.05511e-06	0.0058139	BMI, Age, gender, usual stool type
Medications	Metoprolol (C07AB02)	k__Bacteria;p__Firmicutes;c__Clostridia;o__Clostridiales;f__Ruminococcaceae;g__Ruminococcus;s__Ruminococcus sp. CAG:724	-0.702649	5.2264e-06	0.00600062	BMI, Age, gender, usual stool type
Medications	Metoprolol (C07AB02)	k__Bacteria;p__Firmicutes;c__Clostridia;o__Clostridiales;f__Eubacteriaceae;g__Eubacterium;s__Eubacterium sp. CAG:841	-0.946829	5.48785e-06	0.00628281	BMI, Age, gender, usual stool type
Medications	Metoprolol (C07AB02)	k__Bacteria;p__Proteobacteria;c__Betaproteobacteria;o__Burkholderiales;f__Burkholderiaceae;g__Cupriavidus;s__Cupriavidus taiwanensis	0.295238	5.61318e-06	0.00643368	BMI, Age, gender, usual stool type
Medications	Metoprolol (C07AB02)	k__Bacteria;p__Bacteroidetes;c__Bacteroidia;o__Bacteroidales;f__Bacteroidaceae;g__Bacteroides;s__Bacteroides vulgatus	0.691601	6.05616e-06	0.00693553	BMI, Age, gender, usual stool type
Medications	Metoprolol (C07AB02)	k__Bacteria;p__Proteobacteria;c__Gammaproteobacteria;o__Enterobacterales;f__Enterobacteriaceae;g__Cronobacter;s__Cronobacter dublinensis	0.424438	6.49985e-06	0.00741993	BMI, Age, gender, usual stool type
Medications	Metoprolol (C07AB02)	k__Bacteria;p__Bacteroidetes;c__Bacteroidia;o__Bacteroidales;f__Bacteroidaceae;g__Bacteroides;s__Bacteroides finegoldii CAG:203	0.553106	6.67693e-06	0.00762087	BMI, Age, gender, usual stool type
Medications	Metoprolol (C07AB02)	k__Bacteria;p__Bacteroidetes;c__Bacteroidia;o__Bacteroidales;f__Bacteroidaceae;g__Bacteroides;s__Bacteroides xylanisolvens	0.492833	6.71682e-06	0.00766613	BMI, Age, gender, usual stool type
Medications	Metoprolol (C07AB02)	k__Bacteria;p__Proteobacteria;c__Betaproteobacteria;o__Burkholderiales;f__Alcaligenaceae;g__Achromobacter;s__Achromobacter xylosoxidans	0.357431	6.95057e-06	0.00791185	BMI, Age, gender, usual stool type
Medications	Metoprolol (C07AB02)	k__Bacteria;p__Bacteroidetes;c__Bacteroidia;o__Bacteroidales;f__Bacteroidaceae;g__Bacteroides;s__Bacteroides sp. 4_1_36	0.773099	7.47722e-06	0.0085004	BMI, Age, gender, usual stool type
Medications	Metoprolol (C07AB02)	k__Bacteria;p__Actinobacteria;c__Actinobacteria;o__Corynebacteriales;f__Mycobacteriaceae;g__Mycobacterium;s__Mycobacterium tuberculosis	0.256505	7.57217e-06	0.00860244	BMI, Age, gender, usual stool type
Medications	Metoprolol (C07AB02)	k__Bacteria;p__Bacteroidetes;c__Bacteroidia;o__Bacteroidales;f__Bacteroidaceae;g__Bacteroides;s__Bacteroides sp. CAG:754	0.491941	7.66115e-06	0.00870557	BMI, Age, gender, usual stool type
Medications	Metoprolol (C07AB02)	k__Bacteria;p__Proteobacteria;c__Gammaproteobacteria;o__Vibrionales;f__Vibrionaceae;g__Vibrio;s__Vibrio cholerae	0.374532	7.75861e-06	0.00881027	BMI, Age, gender, usual stool type
Medications	Metoprolol (C07AB02)	k__Bacteria;p__Proteobacteria;c__Betaproteobacteria;o__Neisseriales;f__Neisseriaceae;g__Neisseria;s__Neisseria meningitidis	0.304203	7.90671e-06	0.0089725	BMI, Age, gender, usual stool type
Medications	Metoprolol (C07AB02)	k__Bacteria;p__Proteobacteria;c__Gammaproteobacteria;o__Pseudomonadales;f__Pseudomonadaceae;g__Pseudomonas;s__Pseudomonas fluorescens	0.278678	8.00766e-06	0.00907419	BMI, Age, gender, usual stool type
Medications	Metoprolol (C07AB02)	k__Bacteria;p__Proteobacteria;c__Gammaproteobacteria;o__Enterobacterales;f__Enterobacteriaceae;g__Cronobacter;s__Cronobacter sakazakii	0.331044	8.02876e-06	0.00910582	BMI, Age, gender, usual stool type
Medications	Metoprolol (C07AB02)	k__Bacteria;p__Bacteroidetes;c__Bacteroidia;o__Bacteroidales;f__Bacteroidaceae;g__Bacteroides;s__Bacteroides intestinalis CAG:315	0.608568	8.23554e-06	0.00933477	BMI, Age, gender, usual stool type
Medications	Metoprolol (C07AB02)	k__Bacteria;p__Actinobacteria;c__Actinobacteria;o__Propionibacteriales;f__Nocardioidaceae;g__Micropruina;s__Micropruina glycogenica	0.339188	8.45139e-06	0.00955684	BMI, Age, gender, usual stool type
Medications	Metoprolol (C07AB02)	k__Bacteria;p__Proteobacteria;c__Gammaproteobacteria;o__Pseudomonadales;f__Pseudomonadaceae;g__Pseudomonas;s__Pseudomonas syringae	0.268707	8.54704e-06	0.00967461	BMI, Age, gender, usual stool type
Medications	Metoprolol (C07AB02)	k__Bacteria;p__Bacteroidetes;c__Bacteroidia;o__Bacteroidales;f__Bacteroidaceae;g__Bacteroides;s__Bacteroides oleiciplenus	0.6663	8.86335e-06	0.0100233	BMI, Age, gender, usual stool type
Medications	Metoprolol (C07AB02)	k__Bacteria;p__Bacteroidetes;c__Bacteroidia;o__Bacteroidales;f__Rikenellaceae;g__Alistipes;s__Alistipes finegoldii	0.686079	9.00521e-06	0.0101795	BMI, Age, gender, usual stool type
Medications	Metoprolol (C07AB02)	k__Bacteria;p__Proteobacteria;c__Gammaproteobacteria;o__Pseudomonadales;f__Pseudomonadaceae;g__Pseudomonas;s__Pseudomonas amygdali	0.352323	9.03831e-06	0.0102124	BMI, Age, gender, usual stool type
Medications	Metoprolol (C07AB02)	k__Bacteria;p__Bacteroidetes;c__Bacteroidia;o__Bacteroidales;f__Tannerellaceae;g__Parabacteroides;s__Parabacteroides sp. merdae-related_45_40	0.982739	9.68826e-06	0.0108577	BMI, Age, gender, usual stool type
Medications	Metoprolol (C07AB02)	k__Bacteria;p__Proteobacteria;c__Betaproteobacteria;o__Burkholderiales;f__Burkholderiaceae;g__Ralstonia;s__Ralstonia solanacearum	0.314037	9.81824e-06	0.0110653	BMI, Age, gender, usual stool type
Medications	Metoprolol (C07AB02)	k__Bacteria;p__Proteobacteria;c__Gammaproteobacteria;o__Enterobacterales;f__Enterobacteriaceae;g__Enterobacter;s__Enterobacter ludwigii	0.42264	1.04935e-05	0.0118098	BMI, Age, gender, usual stool type
Medications	Metoprolol (C07AB02)	k__Bacteria;p__Bacteroidetes;c__Bacteroidia;o__Bacteroidales;f__Tannerellaceae;g__Parabacteroides;s__Parabacteroides sp. D25	0.769578	1.13539e-05	0.0124737	BMI, Age, gender, usual stool type
Medications	Metoprolol (C07AB02)	k__Bacteria;p__Bacteroidetes;c__Bacteroidia;o__Bacteroidales;f__Bacteroidaceae;g__Bacteroides;s__Bacteroides caecimuris	0.623608	1.16089e-05	0.0130332	BMI, Age, gender, usual stool type
Medications	Metoprolol (C07AB02)	k__Bacteria;p__Bacteroidetes;c__Bacteroidia;o__Bacteroidales;f__Bacteroidaceae;g__Bacteroides;s__Bacteroides dorei CAG:222	0.595269	1.29515e-05	0.0144955	BMI, Age, gender, usual stool type
Medications	Metoprolol (C07AB02)	k__Bacteria;p__Bacteroidetes;c__Bacteroidia;o__Bacteroidales;f__Prevotellaceae;g__Prevotella;s__Prevotella saccharolytica	0.453467	1.30239e-05	0.0145767	BMI, Age, gender, usual stool type
Medications	Metoprolol (C07AB02)	k__Bacteria;p__Bacteroidetes;c__Bacteroidia;o__Bacteroidales;f__Bacteroidaceae;g__Bacteroides;s__Bacteroides sp. 3_1_19	0.720647	1.30821e-05	0.0146415	BMI, Age, gender, usual stool type
Medications	Metoprolol (C07AB02)	k__Bacteria;p__Firmicutes;c__Clostridia;o__Clostridiales;f__Oscillospiraceae;g__Oscillibacter;s__Oscillibacter sp. KLE 1728	0.468737	1.31227e-05	0.0146796	BMI, Age, gender, usual stool type
Medications	Metoprolol (C07AB02)	k__Bacteria;p__Bacteroidetes;c__Bacteroidia;o__Bacteroidales;f__Prevotellaceae;g__Prevotella;s__Prevotella sp. CAG:1031	0.518598	1.34198e-05	0.0150106	BMI, Age, gender, usual stool type
Medications	Metoprolol (C07AB02)	k__Bacteria;p__Proteobacteria;c__Betaproteobacteria;o__Burkholderiales;f__Burkholderiaceae;g__Burkholderia;s__Burkholderia mallei	0.396539	1.35714e-05	0.0151537	BMI, Age, gender, usual stool type
Medications	Metoprolol (C07AB02)	k__Bacteria;p__Bacteroidetes;c__Bacteroidia;o__Bacteroidales;f__Odoribacteraceae;g__Odoribacter;s__Odoribacter splanchnicus CAG:14	0.469354	1.53474e-05	0.0170996	BMI, Age, gender, usual stool type
Medications	Metoprolol (C07AB02)	k__Bacteria;p__Bacteroidetes;c__Bacteroidia;o__Bacteroidales;f__Unclassified;g__Unclassified;s__Bacteroidales bacterium 43_8	0.560692	1.63113e-05	0.0181402	BMI, Age, gender, usual stool type
Medications	Metoprolol (C07AB02)	k__Bacteria;p__Proteobacteria;c__Gammaproteobacteria;o__Oceanospirillales;f__Halomonadaceae;g__Zymobacter;s__Zymobacter palmae	0.374102	1.67275e-05	0.0185927	BMI, Age, gender, usual stool type
Medications	Metoprolol (C07AB02)	k__Bacteria;p__Firmicutes;c__Unclassified;o__Unclassified;f__Unclassified;g__Unclassified;s__Firmicutes bacterium CAG:124	-0.600798	1.67375e-05	0.0186057	BMI, Age, gender, usual stool type
Medications	Metoprolol (C07AB02)	k__Bacteria;p__Bacteroidetes;c__Bacteroidia;o__Bacteroidales;f__Bacteroidaceae;g__Bacteroides;s__Bacteroides sp. CAG:189	0.559301	1.68103e-05	0.0186817	BMI, Age, gender, usual stool type
Medications	Metoprolol (C07AB02)	k__Bacteria;p__Proteobacteria;c__Alphaproteobacteria;o__Rhizobiales;f__Rhizobiaceae;g__Rhizobium;s__Rhizobium freirei	0.309347	1.72933e-05	0.0192048	BMI, Age, gender, usual stool type
Medications	Metoprolol (C07AB02)	k__Bacteria;p__Bacteroidetes;c__Bacteroidia;o__Bacteroidales;f__Bacteroidaceae;g__Bacteroides;s__Bacteroides stercoris CAG:120	0.540142	2.04481e-05	0.0226171	BMI, Age, gender, usual stool type
Medications	Metoprolol (C07AB02)	k__Bacteria;p__Bacteroidetes;c__Bacteroidia;o__Bacteroidales;f__Rikenellaceae;g__Rikenella;s__Rikenella microfusus	0.569564	2.10792e-05	0.0232769	BMI, Age, gender, usual stool type
Medications	Metoprolol (C07AB02)	k__Bacteria;p__Cyanobacteria;c__Unclassified;o__Nostocales;f__Hapalosiphonaceae;g__Fischerella;s__Fischerella thermalis	0.848271	2.19897e-05	0.0240673	BMI, Age, gender, usual stool type
Medications	Metoprolol (C07AB02)	k__Bacteria;p__Bacteroidetes;c__Bacteroidia;o__Bacteroidales;f__Bacteroidaceae;g__Bacteroides;s__Bacteroides sp. 2_2_4	0.662738	2.26726e-05	0.024973	BMI, Age, gender, usual stool type
Medications	Metoprolol (C07AB02)	k__Bacteria;p__Proteobacteria;c__Gammaproteobacteria;o__Pseudomonadales;f__Pseudomonadaceae;g__Pseudomonas;s__Pseudomonas putida	0.311515	2.29106e-05	0.0252311	BMI, Age, gender, usual stool type
Medications	Metoprolol (C07AB02)	k__Bacteria;p__Firmicutes;c__Clostridia;o__Clostridiales;f__Clostridiales Family XIII. Incertae Sedis;g__Unclassified;s__Clostridiales Family XIII bacterium	-1.05457	2.46539e-05	0.0267355	BMI, Age, gender, usual stool type
Medications	Metoprolol (C07AB02)	k__Bacteria;p__Bacteroidetes;c__Bacteroidia;o__Bacteroidales;f__Bacteroidaceae;g__Bacteroides;s__Bacteroides caccae	0.779932	2.45787e-05	0.0270772	BMI, Age, gender, usual stool type
Medications	Metoprolol (C07AB02)	k__Bacteria;p__Bacteroidetes;c__Bacteroidia;o__Bacteroidales;f__Rikenellaceae;g__Alistipes;s__Alistipes sp. 56_11	0.624491	2.58114e-05	0.0274131	BMI, Age, gender, usual stool type
Medications	Metoprolol (C07AB02)	k__Bacteria;p__Proteobacteria;c__Gammaproteobacteria;o__Enterobacterales;f__Enterobacteriaceae;g__Salmonella;s__Salmonella enterica	0.369454	2.67414e-05	0.0293874	BMI, Age, gender, usual stool type
Medications	Metoprolol (C07AB02)	k__Bacteria;p__Firmicutes;c__Clostridia;o__Clostridiales;f__Ruminococcaceae;g__Ruminococcus;s__Ruminococcus sp. HUN007	-0.656115	2.8007e-05	0.0302813	BMI, Age, gender, usual stool type
Medications	Metoprolol (C07AB02)	k__Bacteria;p__Bacteroidetes;c__Bacteroidia;o__Bacteroidales;f__Bacteroidaceae;g__Bacteroides;s__Bacteroides sp. D1	0.650229	2.94303e-05	0.0321459	BMI, Age, gender, usual stool type
Medications	Metoprolol (C07AB02)	k__Bacteria;p__Proteobacteria;c__Gammaproteobacteria;o__Enterobacterales;f__Yersiniaceae;g__Serratia;s__Serratia marcescens	0.278521	2.99072e-05	0.0327367	BMI, Age, gender, usual stool type
Medications	Metoprolol (C07AB02)	k__Bacteria;p__Bacteroidetes;c__Bacteroidia;o__Bacteroidales;f__Prevotellaceae;g__Prevotella;s__Prevotella bivia	0.437666	3.02955e-05	0.033173	BMI, Age, gender, usual stool type
Medications	Metoprolol (C07AB02)	k__Bacteria;p__Bacteroidetes;c__Bacteroidia;o__Bacteroidales;f__Tannerellaceae;g__Tannerella;s__Tannerella sp. CAG:118	0.517462	3.04215e-05	0.0333056	BMI, Age, gender, usual stool type
Medications	Metoprolol (C07AB02)	k__Bacteria;p__Firmicutes;c__Clostridia;o__Clostridiales;f__Oscillospiraceae;g__Oscillibacter;s__Oscillibacter sp. PEA192	0.423831	3.0444e-05	0.0333176	BMI, Age, gender, usual stool type
Medications	Metoprolol (C07AB02)	k__Bacteria;p__Proteobacteria;c__Betaproteobacteria;o__Burkholderiales;f__Comamonadaceae;g__Variovorax;s__Variovorax sp. WDL1	0.440608	3.06445e-05	0.0334749	BMI, Age, gender, usual stool type
Medications	Metoprolol (C07AB02)	k__Bacteria;p__Bacteroidetes;c__Bacteroidia;o__Bacteroidales;f__Bacteroidaceae;g__Bacteroides;s__Bacteroides sp. D22	0.703128	3.15299e-05	0.0339982	BMI, Age, gender, usual stool type
Medications	Metoprolol (C07AB02)	k__Bacteria;p__Bacteroidetes;c__Bacteroidia;o__Bacteroidales;f__Bacteroidaceae;g__Bacteroides;s__Bacteroides sp. CAG:598	0.512204	3.16649e-05	0.0346182	BMI, Age, gender, usual stool type
Medications	Metoprolol (C07AB02)	k__Bacteria;p__Bacteroidetes;c__Bacteroidia;o__Bacteroidales;f__Prevotellaceae;g__Prevotella;s__Prevotella amnii	0.48351	3.25278e-05	0.0355279	BMI, Age, gender, usual stool type
Medications	Metoprolol (C07AB02)	k__Bacteria;p__Bacteroidetes;c__Bacteroidia;o__Bacteroidales;f__Bacteroidaceae;g__Bacteroides;s__Bacteroides intestinalis	0.588481	3.3056e-05	0.0360891	BMI, Age, gender, usual stool type
Medications	Metoprolol (C07AB02)	k__Bacteria;p__Bacteroidetes;c__Bacteroidia;o__Bacteroidales;f__Bacteroidaceae;g__Bacteroides;s__Bacteroides finegoldii	0.665617	3.36949e-05	0.0367625	BMI, Age, gender, usual stool type
Medications	Metoprolol (C07AB02)	k__Bacteria;p__Firmicutes;c__Clostridia;o__Clostridiales;f__Lachnospiraceae;g__Butyrivibrio;s__Butyrivibrio crossotus CAG:259	-0.909451	3.56018e-05	0.0387357	BMI, Age, gender, usual stool type
Medications	Metoprolol (C07AB02)	k__Bacteria;p__Firmicutes;c__Unclassified;o__Unclassified;f__Unclassified;g__Unclassified;s__Firmicutes bacterium CAG:176_59_8	-0.870011	3.75871e-05	0.0406552	BMI, Age, gender, usual stool type
Medications	Metoprolol (C07AB02)	k__Bacteria;p__Tenericutes;c__Mollicutes;o__Mycoplasmatales;f__Mycoplasmataceae;g__Mycoplasma;s__Mycoplasma sp. CAG:956	-1.32135	3.99701e-05	0.0425917	BMI, Age, gender, usual stool type
Medications	Metoprolol (C07AB02)	k__Bacteria;p__Proteobacteria;c__Alphaproteobacteria;o__Rhizobiales;f__Rhizobiaceae;g__Rhizobium;s__Rhizobium etli	0.237105	3.97457e-05	0.0431683	BMI, Age, gender, usual stool type
Medications	Metoprolol (C07AB02)	k__Bacteria;p__Firmicutes;c__Clostridia;o__Clostridiales;f__Clostridiaceae;g__Clostridium;s__Clostridium phoceensis	0.441758	4.4062e-05	0.0477134	BMI, Age, gender, usual stool type
Medications	Metoprolol (C07AB02)	k__Bacteria;p__Proteobacteria;c__Alphaproteobacteria;o__Unclassified;f__Unclassified;g__Unclassified;s__uncultured Alphaproteobacteria bacterium	0.779416	4.65142e-05	0.0479986	BMI, Age, gender, usual stool type
Medications	Metoprolol (C07AB02)	k__Bacteria;p__Proteobacteria;c__Betaproteobacteria;o__Unclassified;f__Unclassified;g__Candidatus Accumulibacter;s__Candidatus Accumulibacter sp. SK-11	0.270508	4.47806e-05	0.0484344	BMI, Age, gender, usual stool type
Medications	Metoprolol (C07AB02)	k__Bacteria;p__Actinobacteria;c__Actinobacteria;o__Bifidobacteriales;f__Bifidobacteriaceae;g__Bifidobacterium;s__Bifidobacterium animalis	0.282995	4.52997e-05	0.0490008	BMI, Age, gender, usual stool type
Medications	Metoprolol (C07AB02)	k__Bacteria;p__Proteobacteria;c__Betaproteobacteria;o__Burkholderiales;f__Burkholderiaceae;g__Cupriavidus;s__Cupriavidus sp. HMR-1	0.281701	4.62496e-05	0.0497849	BMI, Age, gender, usual stool type
Medications	Metoprolol (C07AB02)	k__Bacteria;p__Actinobacteria;c__Coriobacteriia;o__Eggerthellales;f__Eggerthellaceae;g__Eggerthella;s__Eggerthella sp. CAG:1427	0.254665	4.61538e-05	0.0499303	BMI, Age, gender, usual stool type
Medications	Nebivolol (C07AB12)	k__Bacteria;p__Bacteroidetes;c__Bacteroidia;o__Bacteroidales;f__Rikenellaceae;g__Alistipes;s__Alistipes sp. CAG:268	0.82264	6.8326e-06	0.00840716	BMI, Age, gender, usual stool type
Medications	Nebivolol (C07AB12)	k__Bacteria;p__Firmicutes;c__Clostridia;o__Clostridiales;f__Clostridiaceae;g__Clostridium;s__Clostridium sp. CAG:451	-1.97681	1.92555e-05	0.0236343	BMI, Age, gender, usual stool type
Medications	Nebivolol (C07AB12)	k__Bacteria;p__Bacteroidetes;c__Bacteroidia;o__Bacteroidales;f__Rikenellaceae;g__Alistipes;s__Alistipes finegoldii	0.998368	3.196e-05	0.0392297	BMI, Age, gender, usual stool type
Medications	Non-selective monoamine reuptake inhibitors (N06AA)	k__Bacteria;p__Firmicutes;c__Clostridia;o__Clostridiales;f__Clostridiaceae;g__Hungatella;s__Hungatella hathewayi	1.04971	3.75887e-08	4.6271e-05	BMI, Age, gender, usual stool type
Medications	Non-selective monoamine reuptake inhibitors (N06AA)	k__Bacteria;p__Firmicutes;c__Clostridia;o__Clostridiales;f__Lachnospiraceae;g__Blautia;s__[Ruminococcus] torques	1.65931	4.61108e-07	0.000567145	BMI, Age, gender, usual stool type
Medications	Non-selective monoamine reuptake inhibitors (N06AA)	k__Bacteria;p__Firmicutes;c__Clostridia;o__Clostridiales;f__Lachnospiraceae;g__Dorea;s__Dorea formicigenerans	1.02649	7.11884e-07	0.000874876	BMI, Age, gender, usual stool type
Medications	Non-selective monoamine reuptake inhibitors (N06AA)	k__Bacteria;p__Firmicutes;c__Clostridia;o__Clostridiales;f__Lachnospiraceae;g__Eisenbergiella;s__Eisenbergiella tayi	1.32152	1.78911e-06	0.00219688	BMI, Age, gender, usual stool type
Medications	Non-selective monoamine reuptake inhibitors (N06AA)	k__Bacteria;p__Firmicutes;c__Clostridia;o__Clostridiales;f__Clostridiaceae;g__Clostridium;s__Clostridium sp. KLE 1755	0.848101	1.91995e-05	0.0235518	BMI, Age, gender, usual stool type
Medications	Non-selective monoamine reuptake inhibitors (N06AA)	k__Bacteria;p__Firmicutes;c__Clostridia;o__Clostridiales;f__Ruminococcaceae;g__Ruminococcus;s__Ruminococcus sp. AM42-11	1.3841	3.56384e-05	0.0436758	BMI, Age, gender, usual stool type
Medications	Omeprazole (A02BC01)	k__Bacteria;p__Firmicutes;c__Bacilli;o__Lactobacillales;f__Streptococcaceae;g__Streptococcus;s__Streptococcus parasanguinis	0.923018	9.76346e-06	0.0120188	BMI, Age, gender, usual stool type
Medications	Organic nitrates (C01DA)	k__Viruses;p__Unclassified;c__Unclassified;o__Unclassified;f__Unclassified;g__Unclassified;s__unidentified phage	-1.63996	1.19065e-05	0.0146782	BMI, Age, gender, usual stool type
Medications	Pantoprazole (A02BC02)	k__Bacteria;p__Firmicutes;c__Bacilli;o__Lactobacillales;f__Streptococcaceae;g__Streptococcus;s__Streptococcus salivarius	1.70858	8.52545e-07	0.00104948	BMI, Age, gender, usual stool type
Medications	Pantoprazole (A02BC02)	k__Bacteria;p__Firmicutes;c__Clostridia;o__Clostridiales;f__Lachnospiraceae;g__Eisenbergiella;s__Eisenbergiella massiliensis	0.599149	3.41698e-05	0.0420271	BMI, Age, gender, usual stool type
Medications	Pregabalin (N03AX16)	k__Bacteria;p__Firmicutes;c__Clostridia;o__Clostridiales;f__Clostridiaceae;g__Hungatella;s__Hungatella hathewayi	0.937592	1.36564e-07	0.00016811	BMI, Age, gender, usual stool type
Medications	Pregabalin (N03AX16)	k__Bacteria;p__Firmicutes;c__Clostridia;o__Clostridiales;f__Lachnospiraceae;g__Anaerotignum;s__Anaerotignum lactatifermentans	1.27664	3.52794e-05	0.0433937	BMI, Age, gender, usual stool type
Medications	Telmisartan (C09CA07)	k__Bacteria;p__Proteobacteria;c__Gammaproteobacteria;o__Enterobacterales;f__Enterobacteriaceae;g__Klebsiella;s__Klebsiella pneumoniae	0.930042	5.04633e-06	0.00621204	BMI, Age, gender, usual stool type
Medications	Telmisartan (C09CA07)	k__Bacteria;p__Bacteroidetes;c__Bacteroidia;o__Bacteroidales;f__Tannerellaceae;g__Parabacteroides;s__Parabacteroides johnsonii	1.05742	9.34091e-06	0.0114893	BMI, Age, gender, usual stool type
Medications	Telmisartan+amlodipine (C09DB04)	k__Bacteria;p__Firmicutes;c__Clostridia;o__Clostridiales;f__Lachnospiraceae;g__Fusicatenibacter;s__Fusicatenibacter sp. 2789STDY5834925	1.17422	1.01783e-05	0.0125454	BMI, Age, gender, usual stool type
Medications	Torasemide (C03CA04)	k__Bacteria;p__Proteobacteria;c__Gammaproteobacteria;o__Enterobacterales;f__Enterobacteriaceae;g__Klebsiella;s__Klebsiella variicola	1.43153	1.65225e-05	0.0203391	BMI, Age, gender, usual stool type
Medications	Venlafaxine (N06AX16)	k__Bacteria;p__Firmicutes;c__Clostridia;o__Clostridiales;f__Eubacteriaceae;g__Eubacterium;s__Eubacterium ramulus	1.56885	2.49527e-09	3.07662e-06	BMI, Age, gender, usual stool type
Medications	Venlafaxine (N06AX16)	k__Bacteria;p__Firmicutes;c__Clostridia;o__Clostridiales;f__Clostridiaceae;g__Clostridium;s__Clostridium sp. OF03-18AA	1.70747	2.60077e-07	0.000320232	BMI, Age, gender, usual stool type
Medications	Venlafaxine (N06AX16)	k__Bacteria;p__Firmicutes;c__Clostridia;o__Clostridiales;f__Lachnospiraceae;g__Blautia;s__Blautia obeum	1.29134	5.2357e-07	0.000644368	BMI, Age, gender, usual stool type
Medications	Venlafaxine (N06AX16)	k__Bacteria;p__Firmicutes;c__Clostridia;o__Clostridiales;f__Eubacteriaceae;g__Eubacterium;s__[Eubacterium] hallii	1.62552	6.00437e-07	0.000738498	BMI, Age, gender, usual stool type
Medications	Venlafaxine (N06AX16)	k__Bacteria;p__Firmicutes;c__Clostridia;o__Clostridiales;f__Clostridiaceae;g__Clostridium;s__Clostridium sp. CAG:7	2.12634	7.76502e-07	0.000954263	BMI, Age, gender, usual stool type
Medications	Venlafaxine (N06AX16)	k__Bacteria;p__Firmicutes;c__Clostridia;o__Clostridiales;f__Lachnospiraceae;g__Fusicatenibacter;s__Fusicatenibacter saccharivorans	1.04209	1.83117e-06	0.00224793	BMI, Age, gender, usual stool type
Medications	Venlafaxine (N06AX16)	k__Bacteria;p__Firmicutes;c__Clostridia;o__Clostridiales;f__Lachnospiraceae;g__Dorea;s__Dorea formicigenerans	1.00481	2.44051e-06	0.00299305	BMI, Age, gender, usual stool type
Medications	Venlafaxine (N06AX16)	k__Bacteria;p__Firmicutes;c__Clostridia;o__Clostridiales;f__Clostridiaceae;g__Clostridium;s__Clostridium sp. CAG:81	1.24581	3.05182e-06	0.00373948	BMI, Age, gender, usual stool type
Medications	Venlafaxine (N06AX16)	k__Bacteria;p__Firmicutes;c__Clostridia;o__Clostridiales;f__Clostridiaceae;g__Clostridium;s__Clostridium sp. SS2_1	1.871	3.77485e-06	0.00462189	BMI, Age, gender, usual stool type
Medications	Venlafaxine (N06AX16)	k__Bacteria;p__Firmicutes;c__Clostridia;o__Clostridiales;f__Lachnospiraceae;g__Blautia;s__Blautia sp. KLE 1732	1.63992	3.917e-06	0.00479562	BMI, Age, gender, usual stool type
Medications	Venlafaxine (N06AX16)	k__Bacteria;p__Firmicutes;c__Clostridia;o__Clostridiales;f__Lachnospiraceae;g__Coprococcus;s__Coprococcus catus	1.25709	1.14804e-05	0.0140296	BMI, Age, gender, usual stool type
Medications	Venlafaxine (N06AX16)	k__Bacteria;p__Firmicutes;c__Clostridia;o__Clostridiales;f__Unclassified;g__Unclassified;s__butyrate-producing bacterium SS3_4	1.40452	1.45561e-05	0.0177706	BMI, Age, gender, usual stool type
Medications	Venlafaxine (N06AX16)	k__Bacteria;p__Firmicutes;c__Clostridia;o__Clostridiales;f__Ruminococcaceae;g__Ruminococcus;s__Ruminococcus sp. CAG:60	1.00241	1.67771e-05	0.0204748	BMI, Age, gender, usual stool type
Medications	Venlafaxine (N06AX16)	k__Bacteria;p__Firmicutes;c__Clostridia;o__Clostridiales;f__Lachnospiraceae;g__Roseburia;s__Roseburia sp. CAG:471	1.21101	2.31883e-05	0.0282661	BMI, Age, gender, usual stool type
Medications	Venlafaxine (N06AX16)	k__Bacteria;p__Firmicutes;c__Clostridia;o__Clostridiales;f__Lachnospiraceae;g__Anaerostipes;s__Anaerostipes hadrus	1.59441	2.79764e-05	0.0340782	BMI, Age, gender, usual stool type
Medications	Venlafaxine (N06AX16)	k__Bacteria;p__Firmicutes;c__Clostridia;o__Clostridiales;f__Lachnospiraceae;g__Blautia;s__Blautia wexlerae	1.01325	3.47223e-05	0.0422602	BMI, Age, gender, usual stool type
Medications	Vitamin b12 and folic acid (B03B)	k__Bacteria;p__Firmicutes;c__Clostridia;o__Clostridiales;f__Unclassified;g__Intestinimonas;s__Intestinimonas massiliensis	1.49383	3.19276e-06	0.00392297	BMI, Age, gender, usual stool type
Medications	Vitamin b12 and folic acid (B03B)	k__Bacteria;p__Proteobacteria;c__Betaproteobacteria;o__Unclassified;f__Unclassified;g__Candidatus Accumulibacter;s__Candidatus Accumulibacter sp. BA-91	1.06822	3.85506e-06	0.00474122	BMI, Age, gender, usual stool type
Medications	Vitamin b12 and folic acid (B03B)	k__Bacteria;p__Firmicutes;c__Clostridia;o__Clostridiales;f__Clostridiaceae;g__Clostridium;s__Clostridium sp. CAG:169	1.02064	9.0551e-06	0.0111215	BMI, Age, gender, usual stool type
Medications	Vitamin b12 and folic acid (B03B)	k__Bacteria;p__Proteobacteria;c__Gammaproteobacteria;o__Enterobacterales;f__Enterobacteriaceae;g__Shigella;s__Shigella sonnei	1.66984	9.47517e-06	0.0116355	BMI, Age, gender, usual stool type
Medications	Vitamin b12 and folic acid (B03B)	k__Bacteria;p__Firmicutes;c__Unclassified;o__Unclassified;f__Unclassified;g__Unclassified;s__Firmicutes bacterium CAG:137	0.818648	1.70694e-05	0.0209216	BMI, Age, gender, usual stool type
Medications	Vitamin b12 and folic acid (B03B)	k__Bacteria;p__Firmicutes;c__Clostridia;o__Clostridiales;f__Clostridiaceae;g__Hungatella;s__Hungatella hathewayi	0.887818	1.99094e-05	0.0243817	BMI, Age, gender, usual stool type
Medications	Vitamin b12 and folic acid (B03B)	k__Bacteria;p__Proteobacteria;c__Gammaproteobacteria;o__Enterobacterales;f__Enterobacteriaceae;g__Enterobacter;s__Enterobacter cloacae	0.997257	2.01222e-05	0.0246423	BMI, Age, gender, usual stool type
Medications	Vitamin b12 and folic acid (B03B)	k__Bacteria;p__Firmicutes;c__Clostridia;o__Clostridiales;f__Ruminococcaceae;g__Unclassified;s__Ruminococcaceae bacterium cv2	1.26971	2.78612e-05	0.03406	BMI, Age, gender, usual stool type
Medications	Vitamin b12 and folic acid (B03B)	k__Bacteria;p__Firmicutes;c__Clostridia;o__Clostridiales;f__Lachnospiraceae;g__Eisenbergiella;s__Eisenbergiella tayi	1.24445	3.67522e-05	0.0448805	BMI, Age, gender, usual stool type
Dietary	Boiled vegetables	k__Bacteria;p__Firmicutes;c__Clostridia;o__Clostridiales;f__Unclassified;g__Lawsonibacter;s__Lawsonibacter asaccharolyticus	-0.0516815	7.69233e-07	0.000946605	BMI, Age, gender, usual stool type
Dietary	Boiled vegetables	k__Bacteria;p__Firmicutes;c__Clostridia;o__Clostridiales;f__Clostridiaceae;g__Clostridium;s__Clostridium sp. CAG:411	0.129025	1.02565e-06	0.00126179	BMI, Age, gender, usual stool type
Dietary	Boiled vegetables	k__Bacteria;p__Firmicutes;c__Clostridia;o__Clostridiales;f__Peptococcaceae;g__Pelotomaculum;s__Pelotomaculum thermopropionicum	-0.0293104	8.34688e-06	0.0102516	BMI, Age, gender, usual stool type
Dietary	Boiled vegetables	k__Bacteria;p__Firmicutes;c__Clostridia;o__Clostridiales;f__Lachnospiraceae;g__Unclassified;s__Lachnospiraceae bacterium OM04-12BH	0.0741027	1.11697e-05	0.013715	BMI, Age, gender, usual stool type
Dietary	Boiled vegetables	k__Bacteria;p__Proteobacteria;c__Gammaproteobacteria;o__Pseudomonadales;f__Pseudomonadaceae;g__Pseudomonas;s__Pseudomonas stutzeri	-0.0363537	1.93291e-05	0.0237003	BMI, Age, gender, usual stool type
Dietary	Boiled vegetables	k__Bacteria;p__Actinobacteria;c__Actinobacteria;o__Bifidobacteriales;f__Bifidobacteriaceae;g__Bifidobacterium;s__Bifidobacterium longum CAG:69	-0.0471487	2.09954e-05	0.0257378	BMI, Age, gender, usual stool type
Dietary	Boiled vegetables	k__Bacteria;p__Proteobacteria;c__Betaproteobacteria;o__Burkholderiales;f__Burkholderiaceae;g__Cupriavidus;s__Cupriavidus taiwanensis	-0.0333876	2.86007e-05	0.0350337	BMI, Age, gender, usual stool type
Dietary	Bread	k__Bacteria;p__Firmicutes;c__Clostridia;o__Clostridiales;f__Clostridiaceae;g__Clostridium;s__Clostridium sp. CAG:58	-0.13532	1.79528e-12	2.20999e-09	BMI, Age, gender, usual stool type
Dietary	Bread	k__Bacteria;p__Firmicutes;c__Clostridia;o__Clostridiales;f__Clostridiaceae;g__Clostridium;s__Clostridium phoceensis	-0.105181	1.49957e-08	1.84401e-05	BMI, Age, gender, usual stool type
Dietary	Bread	k__Bacteria;p__Firmicutes;c__Clostridia;o__Clostridiales;f__Unclassified;g__Lawsonibacter;s__Lawsonibacter asaccharolyticus	-0.0821979	1.98477e-08	2.43961e-05	BMI, Age, gender, usual stool type
Dietary	Bread	k__Bacteria;p__Bacteroidetes;c__Bacteroidia;o__Bacteroidales;f__Porphyromonadaceae;g__Porphyromonas;s__Porphyromonas sp. 31_2	-0.128419	1.49798e-06	0.00183946	BMI, Age, gender, usual stool type
Dietary	Bread	k__Bacteria;p__Firmicutes;c__Clostridia;o__Clostridiales;f__Oscillospiraceae;g__Oscillibacter;s__Oscillibacter sp. KLE 1728	-0.0832326	6.78755e-06	0.0083181	BMI, Age, gender, usual stool type
Dietary	Bread	k__Bacteria;p__Firmicutes;c__Clostridia;o__Clostridiales;f__Oscillospiraceae;g__Oscillibacter;s__Oscillibacter sp. KLE 1745	-0.11208	7.17704e-06	0.00878936	BMI, Age, gender, usual stool type
Dietary	Bread	k__Bacteria;p__Bacteroidetes;c__Bacteroidia;o__Bacteroidales;f__Bacteroidaceae;g__Bacteroides;s__Bacteroides sp. 3_1_19	-0.12737	7.4918e-06	0.00917719	BMI, Age, gender, usual stool type
Dietary	Bread	k__Bacteria;p__Bacteroidetes;c__Bacteroidia;o__Bacteroidales;f__Tannerellaceae;g__Parabacteroides;s__Parabacteroides sp. CAG:2	-0.101383	1.11204e-05	0.0135922	BMI, Age, gender, usual stool type
Dietary	Bread	k__Bacteria;p__Firmicutes;c__Clostridia;o__Clostridiales;f__Oscillospiraceae;g__Oscillibacter;s__Oscillibacter sp. PEA192	-0.0767053	1.13205e-05	0.013835	BMI, Age, gender, usual stool type
Dietary	Bread	k__Bacteria;p__Firmicutes;c__Clostridia;o__Clostridiales;f__Lachnospiraceae;g__Anaerotignum;s__Anaerotignum lactatifermentans	-0.0818207	1.45811e-05	0.0177838	BMI, Age, gender, usual stool type
Dietary	Bread	k__Bacteria;p__Bacteroidetes;c__Bacteroidia;o__Bacteroidales;f__Bacteroidaceae;g__Bacteroides;s__Bacteroides sp. 2_1_33B	-0.109569	1.66623e-05	0.0203069	BMI, Age, gender, usual stool type
Dietary	Bread	k__Bacteria;p__Bacteroidetes;c__Bacteroidia;o__Bacteroidales;f__Bacteroidaceae;g__Bacteroides;s__Bacteroides sp. AF25-17LB	-0.147302	1.88619e-05	0.0229436	BMI, Age, gender, usual stool type
Dietary	Bread	k__Bacteria;p__Firmicutes;c__Clostridia;o__Clostridiales;f__Ruminococcaceae;g__Negativibacillus;s__Negativibacillus massiliensis	-0.102871	1.9328e-05	0.0235114	BMI, Age, gender, usual stool type
Dietary	Bread	k__Bacteria;p__Firmicutes;c__Clostridia;o__Clostridiales;f__Clostridiaceae;g__Clostridium;s__Clostridium sp. CAG:7	-0.101389	2.18544e-05	0.0265746	BMI, Age, gender, usual stool type
Dietary	Bread	k__Bacteria;p__Firmicutes;c__Clostridia;o__Clostridiales;f__Lachnospiraceae;g__Blautia;s__[Ruminococcus] torques	-0.0793156	2.35873e-05	0.0286752	BMI, Age, gender, usual stool type
Dietary	Bread	k__Bacteria;p__Proteobacteria;c__Alphaproteobacteria;o__Rhizobiales;f__Rhizobiaceae;g__Agrobacterium;s__Agrobacterium genomosp. 5	-0.0744437	2.69699e-05	0.0327349	BMI, Age, gender, usual stool type
Dietary	Bread	k__Bacteria;p__Firmicutes;c__Clostridia;o__Clostridiales;f__Oscillospiraceae;g__Unclassified;s__Oscillospiraceae bacterium VE202-24	-0.0738011	2.82859e-05	0.0342987	BMI, Age, gender, usual stool type
Dietary	Bread	k__Bacteria;p__Bacteroidetes;c__Bacteroidia;o__Bacteroidales;f__Tannerellaceae;g__Parabacteroides;s__Parabacteroides sp. D13	-0.0948156	3.35087e-05	0.0406173	BMI, Age, gender, usual stool type
Dietary	Bread	k__Bacteria;p__Proteobacteria;c__Gammaproteobacteria;o__Pseudomonadales;f__Pseudomonadaceae;g__Pseudomonas;s__Pseudomonas chlororaphis	-0.113419	3.36613e-05	0.0407862	BMI, Age, gender, usual stool type
Dietary	Coffee	k__Bacteria;p__Proteobacteria;c__Gammaproteobacteria;o__Pasteurellales;f__Pasteurellaceae;g__Haemophilus;s__Haemophilus parainfluenzae	-0.331359	1.85169e-10	2.27943e-07	BMI, Age, gender, usual stool type
Dietary	Coffee	k__Bacteria;p__Actinobacteria;c__Coriobacteriia;o__Eggerthellales;f__Eggerthellaceae;g__Eggerthella;s__Eggerthella sp. 51_9	0.263431	3.30428e-08	4.06391e-05	BMI, Age, gender, usual stool type
Dietary	Coffee	k__Bacteria;p__Firmicutes;c__Clostridia;o__Clostridiales;f__Unclassified;g__Lawsonibacter;s__Lawsonibacter asaccharolyticus	0.0836667	2.83134e-07	0.000347833	BMI, Age, gender, usual stool type
Dietary	Coffee	k__Bacteria;p__Firmicutes;c__Unclassified;o__Unclassified;f__Unclassified;g__Unclassified;s__Firmicutes bacterium CAG:227	-0.239296	5.56802e-07	0.000683484	BMI, Age, gender, usual stool type
Dietary	Coffee	k__Bacteria;p__Firmicutes;c__Clostridia;o__Clostridiales;f__Clostridiaceae;g__Clostridium;s__Clostridium phoceensis	0.102658	6.80289e-07	0.000834869	BMI, Age, gender, usual stool type
Dietary	Coffee	k__Bacteria;p__Firmicutes;c__Clostridia;o__Clostridiales;f__Lachnospiraceae;g__Anaerotignum;s__Anaerotignum sp. KCTC 15736	-0.193777	1.08128e-05	0.01325	BMI, Age, gender, usual stool type
Dietary	Coffee	k__Bacteria;p__Firmicutes;c__Clostridia;o__Clostridiales;f__Lachnospiraceae;g__Roseburia;s__Roseburia sp. CAG:303	-0.14429	1.11803e-05	0.0136981	BMI, Age, gender, usual stool type
Dietary	Coffee	k__Bacteria;p__Firmicutes;c__Clostridia;o__Clostridiales;f__Lachnospiraceae;g__Roseburia;s__Roseburia sp. CAG:100	-0.139181	2.05823e-05	0.0251675	BMI, Age, gender, usual stool type
Dietary	Coffee	k__Bacteria;p__Bacteroidetes;c__Bacteroidia;o__Bacteroidales;f__Prevotellaceae;g__Prevotella;s__Prevotella sp. 109	0.249595	2.11211e-05	0.0258156	BMI, Age, gender, usual stool type
Dietary	Coffee	k__Bacteria;p__Firmicutes;c__Clostridia;o__Clostridiales;f__Lachnospiraceae;g__Unclassified;s__Lachnospiraceae bacterium A4	-0.0526541	2.35836e-05	0.0288109	BMI, Age, gender, usual stool type
Dietary	Coffee	k__Bacteria;p__Bacteroidetes;c__Bacteroidia;o__Bacteroidales;f__Prevotellaceae;g__Prevotella;s__Prevotella sp. CAG:255	0.163455	2.69014e-05	0.0328517	BMI, Age, gender, usual stool type
Dietary	Coffee	k__Bacteria;p__Firmicutes;c__Clostridia;o__Clostridiales;f__Clostridiaceae;g__Unclassified;s__Clostridiaceae bacterium OM08-6BH	-0.0739109	3.3459e-05	0.0408116	BMI, Age, gender, usual stool type
Dietary	Coffee	k__Bacteria;p__Firmicutes;c__Unclassified;o__Unclassified;f__Unclassified;g__Unclassified;s__Firmicutes bacterium CAG:102	-0.129876	3.82049e-05	0.0465663	BMI, Age, gender, usual stool type
Dietary	Compote, jams	k__Bacteria;p__Firmicutes;c__Clostridia;o__Clostridiales;f__Ruminococcaceae;g__Ruminococcus;s__Ruminococcus sp. CAG:254	0.0933634	2.90724e-05	0.0357881	BMI, Age, gender, usual stool type
Dietary	Dairy	k__Viruses;p__Unclassified;c__Unclassified;o__Caudovirales;f__Siphoviridae;g__Sk1virus;s__Lactococcus phage 936 sensu lato	0.248955	5.07921e-15	6.24794e-12	BMI, Age, gender, usual stool type
Dietary	Dairy	k__Bacteria;p__Firmicutes;c__Bacilli;o__Bacillales;f__Staphylococcaceae;g__Staphylococcus;s__Staphylococcus fleurettii	0.315731	1.31132e-14	1.61297e-11	BMI, Age, gender, usual stool type
Dietary	Dairy	k__Bacteria;p__Firmicutes;c__Bacilli;o__Lactobacillales;f__Streptococcaceae;g__Streptococcus;s__Streptococcus thermophilus	0.118351	1.26452e-09	1.55409e-06	BMI, Age, gender, usual stool type
Dietary	Dairy	k__Bacteria;p__Firmicutes;c__Bacilli;o__Lactobacillales;f__Streptococcaceae;g__Lactococcus;s__Lactococcus lactis	0.0849733	2.36976e-06	0.00291006	BMI, Age, gender, usual stool type
Dietary	Fresh fruit, berries	k__Bacteria;p__Firmicutes;c__Unclassified;o__Unclassified;f__Unclassified;g__Unclassified;s__Firmicutes bacterium CAG:882	0.191868	1.09911e-10	1.35257e-07	BMI, Age, gender, usual stool type
Dietary	Fresh fruit, berries	k__Bacteria;p__Bacteroidetes;c__Bacteroidia;o__Bacteroidales;f__Tannerellaceae;g__Parabacteroides;s__Parabacteroides johnsonii	-0.121285	1.88493e-10	2.31705e-07	BMI, Age, gender, usual stool type
Dietary	Fresh fruit, berries	k__Bacteria;p__Firmicutes;c__Clostridia;o__Clostridiales;f__Clostridiaceae;g__Clostridium;s__Clostridium sp. CAG:230	0.177014	3.11574e-10	3.82652e-07	BMI, Age, gender, usual stool type
Dietary	Fresh fruit, berries	k__Bacteria;p__Firmicutes;c__Clostridia;o__Clostridiales;f__Clostridiaceae;g__Clostridium;s__Clostridium sp. CAG:411	0.169836	4.75939e-10	5.82215e-07	BMI, Age, gender, usual stool type
Dietary	Fresh fruit, berries	k__Bacteria;p__Bacteroidetes;c__Bacteroidia;o__Bacteroidales;f__Tannerellaceae;g__Parabacteroides;s__Parabacteroides timonensis	-0.0978802	1.31354e-09	1.60996e-06	BMI, Age, gender, usual stool type
Dietary	Fresh fruit, berries	k__Eukaryota;p__Arthropoda;c__Arachnida;o__Araneae;f__Araneidae;g__Nephila;s__Nephila clavipes	-0.0485863	1.88212e-09	2.30422e-06	BMI, Age, gender, usual stool type
Dietary	Fresh fruit, berries	k__Bacteria;p__Proteobacteria;c__Gammaproteobacteria;o__Chromatiales;f__Chromatiaceae;g__Thiocapsa;s__Thiocapsa sp. KS1	-0.0555709	2.14435e-09	2.62455e-06	BMI, Age, gender, usual stool type
Dietary	Fresh fruit, berries	k__Bacteria;p__Bacteroidetes;c__Bacteroidia;o__Bacteroidales;f__Tannerellaceae;g__Parabacteroides;s__Parabacteroides merdae CAG:48	-0.0828145	2.73269e-09	3.34127e-06	BMI, Age, gender, usual stool type
Dietary	Fresh fruit, berries	k__Bacteria;p__Proteobacteria;c__Gammaproteobacteria;o__Pseudomonadales;f__Pseudomonadaceae;g__Pseudomonas;s__Pseudomonas aeruginosa	-0.04323	4.3975e-09	5.36482e-06	BMI, Age, gender, usual stool type
Dietary	Fresh fruit, berries	k__Bacteria;p__Proteobacteria;c__Gammaproteobacteria;o__Enterobacterales;f__Yersiniaceae;g__Serratia;s__Serratia marcescens	-0.0488917	5.27969e-09	6.43456e-06	BMI, Age, gender, usual stool type
Dietary	Fresh fruit, berries	k__Bacteria;p__Proteobacteria;c__Betaproteobacteria;o__Neisseriales;f__Neisseriaceae;g__Neisseria;s__Neisseria meningitidis	-0.0494924	7.27229e-09	8.84523e-06	BMI, Age, gender, usual stool type
Dietary	Fresh fruit, berries	k__Bacteria;p__Proteobacteria;c__Betaproteobacteria;o__Burkholderiales;f__Burkholderiaceae;g__Ralstonia;s__Ralstonia solanacearum	-0.0515724	7.43941e-09	9.04698e-06	BMI, Age, gender, usual stool type
Dietary	Fresh fruit, berries	k__Bacteria;p__Firmicutes;c__Clostridia;o__Clostridiales;f__Clostridiaceae;g__Clostridium;s__Clostridium sp. CAG:594	0.213645	8.47209e-09	1.02454e-05	BMI, Age, gender, usual stool type
Dietary	Fresh fruit, berries	k__Bacteria;p__Firmicutes;c__Clostridia;o__Clostridiales;f__Unclassified;g__Lawsonibacter;s__Lawsonibacter asaccharolyticus	-0.0615094	9.43486e-09	1.14589e-05	BMI, Age, gender, usual stool type
Dietary	Fresh fruit, berries	k__Bacteria;p__Firmicutes;c__Clostridia;o__Clostridiales;f__Clostridiaceae;g__Clostridium;s__Clostridium sp. CAG:122	0.155645	9.95396e-09	1.19852e-05	BMI, Age, gender, usual stool type
Dietary	Fresh fruit, berries	k__Bacteria;p__Firmicutes;c__Clostridia;o__Clostridiales;f__Clostridiaceae;g__Clostridium;s__Clostridium sp. CAG:575	0.164823	1.48312e-08	1.77124e-05	BMI, Age, gender, usual stool type
Dietary	Fresh fruit, berries	k__Bacteria;p__Firmicutes;c__Clostridia;o__Clostridiales;f__Eubacteriaceae;g__Eubacterium;s__Eubacterium sp. AF22-9	0.153303	1.5867e-08	1.91715e-05	BMI, Age, gender, usual stool type
Dietary	Fresh fruit, berries	k__Bacteria;p__Proteobacteria;c__Gammaproteobacteria;o__Enterobacterales;f__Enterobacteriaceae;g__Cronobacter;s__Cronobacter sakazakii	-0.0525541	1.70183e-08	2.05869e-05	BMI, Age, gender, usual stool type
Dietary	Fresh fruit, berries	k__Bacteria;p__Firmicutes;c__Clostridia;o__Clostridiales;f__Ruminococcaceae;g__Ruminococcus;s__Ruminococcus flavefaciens	0.0770148	1.83739e-08	2.22032e-05	BMI, Age, gender, usual stool type
Dietary	Fresh fruit, berries	k__Bacteria;p__Bacteroidetes;c__Bacteroidia;o__Bacteroidales;f__Tannerellaceae;g__Parabacteroides;s__Parabacteroides merdae	-0.121917	2.02744e-08	2.44997e-05	BMI, Age, gender, usual stool type
Dietary	Fresh fruit, berries	k__Bacteria;p__Proteobacteria;c__Gammaproteobacteria;o__Pseudomonadales;f__Pseudomonadaceae;g__Pseudomonas;s__Pseudomonas syringae group genomosp. 3	-0.0557847	2.06201e-08	2.48958e-05	BMI, Age, gender, usual stool type
Dietary	Fresh fruit, berries	k__Bacteria;p__Firmicutes;c__Clostridia;o__Clostridiales;f__Eubacteriaceae;g__Eubacterium;s__Eubacterium sp. AM46-8	0.13686	2.26182e-08	2.70872e-05	BMI, Age, gender, usual stool type
Dietary	Fresh fruit, berries	k__Bacteria;p__Bacteroidetes;c__Bacteroidia;o__Bacteroidales;f__Tannerellaceae;g__Parabacteroides;s__Parabacteroides johnsonii CAG:246	-0.0776553	2.38539e-08	2.87707e-05	BMI, Age, gender, usual stool type
Dietary	Fresh fruit, berries	k__Bacteria;p__Firmicutes;c__Clostridia;o__Clostridiales;f__Clostridiaceae;g__Clostridium;s__Clostridium sp. CAG:492	0.191581	3.46816e-08	4.12341e-05	BMI, Age, gender, usual stool type
Dietary	Fresh fruit, berries	k__Bacteria;p__Firmicutes;c__Clostridia;o__Clostridiales;f__Unclassified;g__Unclassified;s__[Bacteroides] pectinophilus	0.0735428	3.43787e-08	4.1318e-05	BMI, Age, gender, usual stool type
Dietary	Fresh fruit, berries	k__Bacteria;p__Candidatus Melainabacteria;c__Unclassified;o__Unclassified;f__Unclassified;g__Unclassified;s__Candidatus Melainabacteria bacterium LEY3_CP_29_8	0.158645	3.60698e-08	4.30786e-05	BMI, Age, gender, usual stool type
Dietary	Fresh fruit, berries	k__Bacteria;p__Actinobacteria;c__Coriobacteriia;o__Eggerthellales;f__Eggerthellaceae;g__Eggerthella;s__Eggerthella sp. CAG:1427	-0.0431951	3.7599e-08	4.51664e-05	BMI, Age, gender, usual stool type
Dietary	Fresh fruit, berries	k__Bacteria;p__Bacteroidetes;c__Bacteroidia;o__Bacteroidales;f__Prevotellaceae;g__Prevotella;s__Prevotella sp. CAG:755	-0.0730254	3.9332e-08	4.7221e-05	BMI, Age, gender, usual stool type
Dietary	Fresh fruit, berries	k__Bacteria;p__Firmicutes;c__Clostridia;o__Clostridiales;f__Clostridiaceae;g__Clostridium;s__Clostridium sp. CAG:451	0.20464	4.82866e-08	5.67886e-05	BMI, Age, gender, usual stool type
Dietary	Fresh fruit, berries	k__Bacteria;p__Firmicutes;c__Clostridia;o__Clostridiales;f__Lachnospiraceae;g__Acetatifactor;s__Acetatifactor muris	0.0597994	4.95534e-08	5.92939e-05	BMI, Age, gender, usual stool type
Dietary	Fresh fruit, berries	k__Bacteria;p__Proteobacteria;c__Gammaproteobacteria;o__Enterobacterales;f__Enterobacteriaceae;g__Cronobacter;s__Cronobacter dublinensis	-0.0644709	5.07114e-08	6.06956e-05	BMI, Age, gender, usual stool type
Dietary	Fresh fruit, berries	k__Bacteria;p__Firmicutes;c__Clostridia;o__Clostridiales;f__Clostridiaceae;g__Clostridium;s__Clostridium sp. 28_17	0.232521	5.24934e-08	6.0818e-05	BMI, Age, gender, usual stool type
Dietary	Fresh fruit, berries	k__Bacteria;p__Firmicutes;c__Clostridia;o__Clostridiales;f__Clostridiaceae;g__Clostridium;s__Clostridium sp. 26_22	0.171695	5.56643e-08	6.60803e-05	BMI, Age, gender, usual stool type
Dietary	Fresh fruit, berries	k__Bacteria;p__Proteobacteria;c__Gammaproteobacteria;o__Oceanospirillales;f__Halomonadaceae;g__Zymobacter;s__Zymobacter palmae	-0.0593293	5.563e-08	6.65221e-05	BMI, Age, gender, usual stool type
Dietary	Fresh fruit, berries	k__Bacteria;p__Firmicutes;c__Clostridia;o__Clostridiales;f__Clostridiaceae;g__Clostridium;s__Clostridium sp. CAG:417	0.227817	5.89464e-08	6.95082e-05	BMI, Age, gender, usual stool type
Dietary	Fresh fruit, berries	k__Bacteria;p__Firmicutes;c__Clostridia;o__Clostridiales;f__Lachnospiraceae;g__Roseburia;s__Roseburia sp. AM59-24XD	0.12166	6.95046e-08	8.27182e-05	BMI, Age, gender, usual stool type
Dietary	Fresh fruit, berries	k__Bacteria;p__Proteobacteria;c__Betaproteobacteria;o__Burkholderiales;f__Alcaligenaceae;g__Achromobacter;s__Achromobacter xylosoxidans	-0.0538645	7.12442e-08	8.48535e-05	BMI, Age, gender, usual stool type
Dietary	Fresh fruit, berries	k__Bacteria;p__Bacteroidetes;c__Bacteroidia;o__Bacteroidales;f__Bacteroidaceae;g__Bacteroides;s__Bacteroides sp. CAG:661	-0.0679824	8.2109e-08	9.77047e-05	BMI, Age, gender, usual stool type
Dietary	Fresh fruit, berries	k__Bacteria;p__Firmicutes;c__Clostridia;o__Clostridiales;f__Clostridiaceae;g__Clostridium;s__Clostridium sp. CAG:440	0.185231	8.67554e-08	0.000102273	BMI, Age, gender, usual stool type
Dietary	Fresh fruit, berries	k__Bacteria;p__Bacteroidetes;c__Bacteroidia;o__Bacteroidales;f__Bacteroidaceae;g__Bacteroides;s__Bacteroides barnesiae	-0.114704	8.61275e-08	0.000102366	BMI, Age, gender, usual stool type
Dietary	Fresh fruit, berries	k__Bacteria;p__Proteobacteria;c__Betaproteobacteria;o__Burkholderiales;f__Alcaligenaceae;g__Bordetella;s__Bordetella pertussis	-0.0481494	8.88772e-08	0.000105619	BMI, Age, gender, usual stool type
Dietary	Fresh fruit, berries	k__Bacteria;p__Proteobacteria;c__Gammaproteobacteria;o__Xanthomonadales;f__Xanthomonadaceae;g__Xanthomonas;s__Xanthomonas citri	-0.0418093	1.04861e-07	0.000124218	BMI, Age, gender, usual stool type
Dietary	Fresh fruit, berries	k__Bacteria;p__Bacteroidetes;c__Bacteroidia;o__Bacteroidales;f__Unclassified;g__Unclassified;s__Bacteroidales bacterium Barb7	-0.0711081	1.05992e-07	0.000125541	BMI, Age, gender, usual stool type
Dietary	Fresh fruit, berries	k__Bacteria;p__Actinobacteria;c__Actinobacteria;o__Corynebacteriales;f__Mycobacteriaceae;g__Mycobacteroides;s__Mycobacteroides abscessus	-0.0395371	1.07735e-07	0.000127569	BMI, Age, gender, usual stool type
Dietary	Fresh fruit, berries	k__Bacteria;p__Bacteroidetes;c__Bacteroidia;o__Bacteroidales;f__Tannerellaceae;g__Parabacteroides;s__Parabacteroides sp. SN4	-0.117663	1.12119e-07	0.000132526	BMI, Age, gender, usual stool type
Dietary	Fresh fruit, berries	k__Bacteria;p__Proteobacteria;c__Gammaproteobacteria;o__Xanthomonadales;f__Xanthomonadaceae;g__Xanthomonas;s__Xanthomonas phaseoli	-0.0525036	1.14438e-07	0.000135328	BMI, Age, gender, usual stool type
Dietary	Fresh fruit, berries	k__Bacteria;p__Firmicutes;c__Clostridia;o__Clostridiales;f__Eubacteriaceae;g__Eubacterium;s__Eubacterium sp. AM49-13BH	0.133424	1.19175e-07	0.00014068	BMI, Age, gender, usual stool type
Dietary	Fresh fruit, berries	k__Bacteria;p__Actinobacteria;c__Actinobacteria;o__Corynebacteriales;f__Mycobacteriaceae;g__Mycobacterium;s__Mycobacterium tuberculosis	-0.0379366	1.38331e-07	0.000163185	BMI, Age, gender, usual stool type
Dietary	Fresh fruit, berries	k__Bacteria;p__Proteobacteria;c__Gammaproteobacteria;o__Pseudomonadales;f__Pseudomonadaceae;g__Pseudomonas;s__Pseudomonas fluorescens	-0.041281	1.44088e-07	0.000169766	BMI, Age, gender, usual stool type
Dietary	Fresh fruit, berries	k__Bacteria;p__Firmicutes;c__Clostridia;o__Clostridiales;f__Clostridiaceae;g__Clostridium;s__Clostridium sp. CAG:343	0.19597	1.49226e-07	0.000175145	BMI, Age, gender, usual stool type
Dietary	Fresh fruit, berries	k__Bacteria;p__Bacteroidetes;c__Bacteroidia;o__Bacteroidales;f__Bacteroidaceae;g__Bacteroides;s__Bacteroides xylanisolvens	-0.0717072	1.88643e-07	0.000221738	BMI, Age, gender, usual stool type
Dietary	Fresh fruit, berries	k__Bacteria;p__Proteobacteria;c__Gammaproteobacteria;o__Enterobacterales;f__Enterobacteriaceae;g__Klebsiella;s__Klebsiella oxytoca	-0.0447762	1.89158e-07	0.000222164	BMI, Age, gender, usual stool type
Dietary	Fresh fruit, berries	k__Bacteria;p__Firmicutes;c__Clostridia;o__Clostridiales;f__Clostridiaceae;g__Clostridium;s__Clostridium sp. CAG:389	0.155066	2.08193e-07	0.000242359	BMI, Age, gender, usual stool type
Dietary	Fresh fruit, berries	k__Bacteria;p__Tenericutes;c__Mollicutes;o__Mycoplasmatales;f__Mycoplasmataceae;g__Mycoplasma;s__Mycoplasma sp. CAG:472	0.216311	2.09029e-07	0.000242444	BMI, Age, gender, usual stool type
Dietary	Fresh fruit, berries	k__Bacteria;p__Proteobacteria;c__Alphaproteobacteria;o__Rhodospirillales;f__Rhodospirillaceae;g__Nitrospirillum;s__Nitrospirillum amazonense	-0.0464677	2.15332e-07	0.000252499	BMI, Age, gender, usual stool type
Dietary	Fresh fruit, berries	k__Bacteria;p__Proteobacteria;c__Betaproteobacteria;o__Burkholderiales;f__Burkholderiaceae;g__Cupriavidus;s__Cupriavidus taiwanensis	-0.0422685	2.34388e-07	0.00027453	BMI, Age, gender, usual stool type
Dietary	Fresh fruit, berries	k__Bacteria;p__Firmicutes;c__Clostridia;o__Clostridiales;f__Clostridiaceae;g__Clostridium;s__Clostridium sp. CAG:307_30_263	0.192691	2.65372e-07	0.000309341	BMI, Age, gender, usual stool type
Dietary	Fresh fruit, berries	k__Bacteria;p__Cyanobacteria;c__Unclassified;o__Nostocales;f__Tolypothrichaceae;g__Tolypothrix;s__Tolypothrix campylonemoides	-0.043864	2.79541e-07	0.000326724	BMI, Age, gender, usual stool type
Dietary	Fresh fruit, berries	k__Bacteria;p__Firmicutes;c__Clostridia;o__Clostridiales;f__Clostridiaceae;g__Clostridium;s__Clostridium sp. CAG:710	0.240392	2.99315e-07	0.000340407	BMI, Age, gender, usual stool type
Dietary	Fresh fruit, berries	k__Bacteria;p__Firmicutes;c__Clostridia;o__Clostridiales;f__Clostridiaceae;g__Clostridium;s__Clostridium sp. CAG:356	0.156126	3.29106e-07	0.000379054	BMI, Age, gender, usual stool type
Dietary	Fresh fruit, berries	k__Bacteria;p__Firmicutes;c__Clostridia;o__Clostridiales;f__Oscillospiraceae;g__Oscillibacter;s__Oscillibacter sp. KLE 1728	-0.0690555	3.28506e-07	0.000382756	BMI, Age, gender, usual stool type
Dietary	Fresh fruit, berries	k__Bacteria;p__Bacteroidetes;c__Bacteroidia;o__Bacteroidales;f__Bacteroidaceae;g__Bacteroides;s__Bacteroides sp. CAG:598	-0.0787457	3.59516e-07	0.000418462	BMI, Age, gender, usual stool type
Dietary	Fresh fruit, berries	k__Bacteria;p__Proteobacteria;c__Alphaproteobacteria;o__Rhizobiales;f__Rhizobiaceae;g__Rhizobium;s__Rhizobium freirei	-0.046035	3.64765e-07	0.000424284	BMI, Age, gender, usual stool type
Dietary	Fresh fruit, berries	k__Bacteria;p__Bacteroidetes;c__Bacteroidia;o__Bacteroidales;f__Tannerellaceae;g__Tannerella;s__Tannerella sp. CAG:51	-0.0864183	3.75924e-07	0.00043724	BMI, Age, gender, usual stool type
Dietary	Fresh fruit, berries	k__Bacteria;p__Firmicutes;c__Clostridia;o__Clostridiales;f__Eubacteriaceae;g__Eubacterium;s__Eubacterium sp. 36_13	0.170101	4.12164e-07	0.000473575	BMI, Age, gender, usual stool type
Dietary	Fresh fruit, berries	k__Bacteria;p__Firmicutes;c__Clostridia;o__Clostridiales;f__Clostridiaceae;g__Clostridium;s__Clostridium sp. 28_12	0.223672	4.3781e-07	0.000494989	BMI, Age, gender, usual stool type
Dietary	Fresh fruit, berries	k__Bacteria;p__Firmicutes;c__Clostridia;o__Clostridiales;f__Clostridiaceae;g__Clostridium;s__Clostridium sp. CAG:571	0.131617	4.50044e-07	0.00052043	BMI, Age, gender, usual stool type
Dietary	Fresh fruit, berries	k__Bacteria;p__Firmicutes;c__Clostridia;o__Clostridiales;f__Clostridiaceae;g__Clostridium;s__Clostridium sp. CAG:433	0.22686	4.55699e-07	0.000523223	BMI, Age, gender, usual stool type
Dietary	Fresh fruit, berries	k__Bacteria;p__Proteobacteria;c__Deltaproteobacteria;o__Myxococcales;f__Archangiaceae;g__Stigmatella;s__Stigmatella aurantiaca	-0.0379965	4.6304e-07	0.000536235	BMI, Age, gender, usual stool type
Dietary	Fresh fruit, berries	k__Bacteria;p__Proteobacteria;c__Gammaproteobacteria;o__Pseudomonadales;f__Pseudomonadaceae;g__Pseudomonas;s__Pseudomonas stutzeri	-0.0438465	5.12121e-07	0.000589417	BMI, Age, gender, usual stool type
Dietary	Fresh fruit, berries	k__Bacteria;p__Firmicutes;c__Bacilli;o__Bacillales;f__Paenibacillaceae;g__Paenibacillus;s__Paenibacillus sp. P22	-0.0307161	5.42111e-07	0.000625872	BMI, Age, gender, usual stool type
Dietary	Fresh fruit, berries	k__Bacteria;p__Proteobacteria;c__Gammaproteobacteria;o__Enterobacterales;f__Enterobacteriaceae;g__Enterobacter;s__Enterobacter ludwigii	-0.0603041	5.72527e-07	0.000659989	BMI, Age, gender, usual stool type
Dietary	Fresh fruit, berries	k__Bacteria;p__Firmicutes;c__Clostridia;o__Clostridiales;f__Lachnospiraceae;g__Roseburia;s__Roseburia sp. CAG:10041_57	0.11783	5.93641e-07	0.000682293	BMI, Age, gender, usual stool type
Dietary	Fresh fruit, berries	k__Bacteria;p__Bacteroidetes;c__Bacteroidia;o__Bacteroidales;f__Bacteroidaceae;g__Bacteroides;s__Bacteroides cellulosilyticus CAG:158	-0.0784001	5.97146e-07	0.000688047	BMI, Age, gender, usual stool type
Dietary	Fresh fruit, berries	k__Bacteria;p__Bacteroidetes;c__Bacteroidia;o__Bacteroidales;f__Bacteroidaceae;g__Bacteroides;s__Bacteroides sp. CAG:702	-0.0750184	5.97817e-07	0.000688743	BMI, Age, gender, usual stool type
Dietary	Fresh fruit, berries	k__Bacteria;p__Tenericutes;c__Mollicutes;o__Mycoplasmatales;f__Mycoplasmataceae;g__Mycoplasma;s__Mycoplasma sp. CAG:877	0.232004	6.25833e-07	0.000696703	BMI, Age, gender, usual stool type
Dietary	Fresh fruit, berries	k__Bacteria;p__Firmicutes;c__Clostridia;o__Clostridiales;f__Clostridiaceae;g__Clostridium;s__Clostridium sp. TF01-11	0.0832516	6.4021e-07	0.00073135	BMI, Age, gender, usual stool type
Dietary	Fresh fruit, berries	k__Bacteria;p__Proteobacteria;c__Betaproteobacteria;o__Burkholderiales;f__Comamonadaceae;g__Hydrogenophaga;s__Hydrogenophaga sp. T4	-0.0470925	6.38979e-07	0.000733561	BMI, Age, gender, usual stool type
Dietary	Fresh fruit, berries	k__Bacteria;p__Firmicutes;c__Clostridia;o__Clostridiales;f__Lachnospiraceae;g__Blautia;s__Blautia sp. AF19-10LB	0.0901455	6.7604e-07	0.000773246	BMI, Age, gender, usual stool type
Dietary	Fresh fruit, berries	k__Bacteria;p__Firmicutes;c__Unclassified;o__Unclassified;f__Unclassified;g__Unclassified;s__Firmicutes bacterium CAG:345	0.207748	6.91823e-07	0.000786899	BMI, Age, gender, usual stool type
Dietary	Fresh fruit, berries	k__Bacteria;p__Proteobacteria;c__Acidithiobacillia;o__Acidithiobacillales;f__Acidithiobacillaceae;g__Acidithiobacillus;s__Acidithiobacillus ferrivorans	-0.0519411	6.98797e-07	0.000799956	BMI, Age, gender, usual stool type
Dietary	Fresh fruit, berries	k__Bacteria;p__Actinobacteria;c__Actinobacteria;o__Bifidobacteriales;f__Bifidobacteriaceae;g__Bifidobacterium;s__Bifidobacterium longum	-0.0962029	7.63131e-07	0.000873497	BMI, Age, gender, usual stool type
Dietary	Fresh fruit, berries	k__Bacteria;p__Firmicutes;c__Clostridia;o__Clostridiales;f__Ruminococcaceae;g__Pseudoflavonifractor;s__Pseudoflavonifractor sp. An184	-0.0521824	8.19625e-07	0.000933919	BMI, Age, gender, usual stool type
Dietary	Fresh fruit, berries	k__Bacteria;p__Proteobacteria;c__Alphaproteobacteria;o__Rhizobiales;f__Rhizobiaceae;g__Rhizobium;s__Rhizobium etli	-0.0357678	8.2102e-07	0.000937181	BMI, Age, gender, usual stool type
Dietary	Fresh fruit, berries	k__Bacteria;p__Proteobacteria;c__Gammaproteobacteria;o__Pseudomonadales;f__Moraxellaceae;g__Acinetobacter;s__Acinetobacter baumannii	-0.0472813	8.31259e-07	0.000948839	BMI, Age, gender, usual stool type
Dietary	Fresh fruit, berries	k__Bacteria;p__Bacteroidetes;c__Bacteroidia;o__Bacteroidales;f__Tannerellaceae;g__Tannerella;s__Tannerella sp. CAG:118	-0.0767847	8.57294e-07	0.000977787	BMI, Age, gender, usual stool type
Dietary	Fresh fruit, berries	k__Bacteria;p__Bacteroidetes;c__Bacteroidia;o__Bacteroidales;f__Unclassified;g__Unclassified;s__Bacteroidales bacterium Barb6	-0.068708	8.82914e-07	0.00100645	BMI, Age, gender, usual stool type
Dietary	Fresh fruit, berries	k__Bacteria;p__Proteobacteria;c__Betaproteobacteria;o__Burkholderiales;f__Burkholderiaceae;g__Cupriavidus;s__Cupriavidus oxalaticus	-0.0497307	8.87994e-07	0.00101128	BMI, Age, gender, usual stool type
Dietary	Fresh fruit, berries	k__Bacteria;p__Bacteroidetes;c__Bacteroidia;o__Bacteroidales;f__Tannerellaceae;g__Parabacteroides;s__Parabacteroides sp. TM07-1AC	-0.105279	9.50711e-07	0.0010793	BMI, Age, gender, usual stool type
Dietary	Fresh fruit, berries	k__Bacteria;p__Bacteroidetes;c__Bacteroidia;o__Bacteroidales;f__Tannerellaceae;g__Tannerella;s__Tannerella sp. 6_1_58FAA_CT1	-0.0750336	9.5917e-07	0.00109051	BMI, Age, gender, usual stool type
Dietary	Fresh fruit, berries	k__Bacteria;p__Unclassified;c__Unclassified;o__Unclassified;f__Unclassified;g__Unclassified;s__uncultured bacterium	-0.0538456	9.7023e-07	0.00110245	BMI, Age, gender, usual stool type
Dietary	Fresh fruit, berries	k__Bacteria;p__Bacteroidetes;c__Bacteroidia;o__Bacteroidales;f__Bacteroidaceae;g__Bacteroides;s__Bacteroides reticulotermitis	-0.082365	9.91607e-07	0.00112575	BMI, Age, gender, usual stool type
Dietary	Fresh fruit, berries	k__Bacteria;p__Firmicutes;c__Clostridia;o__Clostridiales;f__Eubacteriaceae;g__Eubacterium;s__Eubacterium sp. CAG:86	0.148093	1.03237e-06	0.00117087	BMI, Age, gender, usual stool type
Dietary	Fresh fruit, berries	k__Bacteria;p__Firmicutes;c__Unclassified;o__Unclassified;f__Unclassified;g__Unclassified;s__Firmicutes bacterium CAG:582	0.18251	1.04501e-06	0.00117995	BMI, Age, gender, usual stool type
Dietary	Fresh fruit, berries	k__Bacteria;p__Firmicutes;c__Clostridia;o__Clostridiales;f__Clostridiaceae;g__Clostridium;s__Clostridium sp. AF34-13	0.114202	1.1148e-06	0.00119614	BMI, Age, gender, usual stool type
Dietary	Fresh fruit, berries	k__Bacteria;p__Firmicutes;c__Clostridia;o__Clostridiales;f__Lachnospiraceae;g__Unclassified;s__Lachnospiraceae bacterium OM04-12BH	0.0843804	1.0771e-06	0.00122043	BMI, Age, gender, usual stool type
Dietary	Fresh fruit, berries	k__Bacteria;p__Firmicutes;c__Clostridia;o__Clostridiales;f__Ruminococcaceae;g__Faecalibacterium;s__Faecalibacterium sp. CAG:74_58_120	0.1189	1.12433e-06	0.00127303	BMI, Age, gender, usual stool type
Dietary	Fresh fruit, berries	k__Bacteria;p__Tenericutes;c__Mollicutes;o__Mycoplasmatales;f__Mycoplasmataceae;g__Mycoplasma;s__Mycoplasma sp. CAG:956	0.194139	1.20985e-06	0.00134267	BMI, Age, gender, usual stool type
Dietary	Fresh fruit, berries	k__Bacteria;p__Proteobacteria;c__Alphaproteobacteria;o__Rhodobacterales;f__Rhodobacteraceae;g__Pseudooceanicola;s__Pseudooceanicola batsensis	-0.0494191	1.20264e-06	0.00135582	BMI, Age, gender, usual stool type
Dietary	Fresh fruit, berries	k__Bacteria;p__Actinobacteria;c__Actinobacteria;o__Micrococcales;f__Microbacteriaceae;g__Curtobacterium;s__Curtobacterium sp. ER1_6	-0.037424	1.28696e-06	0.00145226	BMI, Age, gender, usual stool type
Dietary	Fresh fruit, berries	k__Bacteria;p__Firmicutes;c__Clostridia;o__Clostridiales;f__Oscillospiraceae;g__Oscillibacter;s__Oscillibacter sp. KLE 1745	-0.0884264	1.32871e-06	0.00149574	BMI, Age, gender, usual stool type
Dietary	Fresh fruit, berries	k__Bacteria;p__Firmicutes;c__Clostridia;o__Clostridiales;f__Lachnospiraceae;g__Roseburia;s__Roseburia sp. CAG:303	0.104152	1.42842e-06	0.00160754	BMI, Age, gender, usual stool type
Dietary	Fresh fruit, berries	k__Bacteria;p__Proteobacteria;c__Gammaproteobacteria;o__Enterobacterales;f__Enterobacteriaceae;g__Salmonella;s__Salmonella enterica	-0.0532897	1.4565e-06	0.00163974	BMI, Age, gender, usual stool type
Dietary	Fresh fruit, berries	k__Bacteria;p__Bacteroidetes;c__Bacteroidia;o__Bacteroidales;f__Unclassified;g__Unclassified;s__Bacteroidales bacterium Barb4	-0.0641848	1.50938e-06	0.00169791	BMI, Age, gender, usual stool type
Dietary	Fresh fruit, berries	k__Bacteria;p__Bacteroidetes;c__Bacteroidia;o__Bacteroidales;f__Bacteroidaceae;g__Bacteroides;s__Bacteroides eggerthii CAG:109	-0.0715566	1.75291e-06	0.00196524	BMI, Age, gender, usual stool type
Dietary	Fresh fruit, berries	k__Bacteria;p__Firmicutes;c__Clostridia;o__Clostridiales;f__Lachnospiraceae;g__Unclassified;s__Lachnospiraceae bacterium	0.0845437	1.77108e-06	0.00198442	BMI, Age, gender, usual stool type
Dietary	Fresh fruit, berries	k__Bacteria;p__Firmicutes;c__Clostridia;o__Clostridiales;f__Clostridiaceae;g__Clostridium;s__Clostridium sp. CAG:921	0.133804	1.89046e-06	0.00208461	BMI, Age, gender, usual stool type
Dietary	Fresh fruit, berries	k__Bacteria;p__Bacteroidetes;c__Bacteroidia;o__Bacteroidales;f__Bacteroidaceae;g__Bacteroides;s__Bacteroides sp. CAG:714	-0.0789907	1.90282e-06	0.00212937	BMI, Age, gender, usual stool type
Dietary	Fresh fruit, berries	k__Bacteria;p__Firmicutes;c__Bacilli;o__Bacillales;f__Bacillaceae;g__Bacillus;s__Bacillus sp. CAG:988	0.172879	2.16217e-06	0.00233769	BMI, Age, gender, usual stool type
Dietary	Fresh fruit, berries	k__Bacteria;p__Actinobacteria;c__Actinobacteria;o__Propionibacteriales;f__Nocardioidaceae;g__Micropruina;s__Micropruina glycogenica	-0.0454469	2.11627e-06	0.00235508	BMI, Age, gender, usual stool type
Dietary	Fresh fruit, berries	k__Bacteria;p__Proteobacteria;c__Alphaproteobacteria;o__Rhodobacterales;f__Rhodobacteraceae;g__Salipiger;s__Salipiger bermudensis	-0.0424621	2.14764e-06	0.00239367	BMI, Age, gender, usual stool type
Dietary	Fresh fruit, berries	k__Bacteria;p__Bacteroidetes;c__Bacteroidia;o__Bacteroidales;f__Bacteroidaceae;g__Bacteroides;s__Bacteroides thetaiotaomicron	-0.084239	2.18033e-06	0.00243393	BMI, Age, gender, usual stool type
Dietary	Fresh fruit, berries	k__Bacteria;p__Bacteroidetes;c__Bacteroidia;o__Bacteroidales;f__Bacteroidaceae;g__Bacteroides;s__Bacteroides clarus CAG:160	-0.073333	2.41043e-06	0.00268375	BMI, Age, gender, usual stool type
Dietary	Fresh fruit, berries	k__Bacteria;p__Bacteroidetes;c__Bacteroidia;o__Bacteroidales;f__Bacteroidaceae;g__Bacteroides;s__Bacteroides ovatus	-0.0862516	2.66249e-06	0.00295664	BMI, Age, gender, usual stool type
Dietary	Fresh fruit, berries	k__Bacteria;p__Proteobacteria;c__Gammaproteobacteria;o__Pseudomonadales;f__Pseudomonadaceae;g__Pseudomonas;s__Pseudomonas syringae	-0.0356327	2.71611e-06	0.00301194	BMI, Age, gender, usual stool type
Dietary	Fresh fruit, berries	k__Bacteria;p__Actinobacteria;c__Coriobacteriia;o__Coriobacteriales;f__Coriobacteriaceae;g__Collinsella;s__Collinsella aerofaciens	-0.0324134	2.72034e-06	0.0030184	BMI, Age, gender, usual stool type
Dietary	Fresh fruit, berries	k__Bacteria;p__Bacteroidetes;c__Bacteroidia;o__Bacteroidales;f__Prevotellaceae;g__Prevotella;s__Prevotella sp. CAG:1124	-0.0734754	2.85042e-06	0.00315908	BMI, Age, gender, usual stool type
Dietary	Fresh fruit, berries	k__Bacteria;p__Actinobacteria;c__Actinobacteria;o__Bifidobacteriales;f__Bifidobacteriaceae;g__Bifidobacterium;s__Bifidobacterium longum CAG:69	-0.0531788	2.97519e-06	0.00327644	BMI, Age, gender, usual stool type
Dietary	Fresh fruit, berries	k__Bacteria;p__Firmicutes;c__Clostridia;o__Clostridiales;f__Lachnospiraceae;g__Blautia;s__Blautia sp. OM07-19	0.0792118	3.12634e-06	0.00343875	BMI, Age, gender, usual stool type
Dietary	Fresh fruit, berries	k__Bacteria;p__Firmicutes;c__Unclassified;o__Unclassified;f__Unclassified;g__Unclassified;s__Firmicutes bacterium CAG:227	0.14649	3.23716e-06	0.00351509	BMI, Age, gender, usual stool type
Dietary	Fresh fruit, berries	k__Bacteria;p__Firmicutes;c__Clostridia;o__Clostridiales;f__Clostridiaceae;g__Clostridium;s__Clostridium sp. CAG:1000	0.198136	3.29516e-06	0.00352705	BMI, Age, gender, usual stool type
Dietary	Fresh fruit, berries	k__Bacteria;p__Firmicutes;c__Unclassified;o__Unclassified;f__Unclassified;g__Unclassified;s__Firmicutes bacterium CAG:884	0.166837	3.26008e-06	0.00353327	BMI, Age, gender, usual stool type
Dietary	Fresh fruit, berries	k__Bacteria;p__Firmicutes;c__Clostridia;o__Clostridiales;f__Clostridiaceae;g__Clostridium;s__Clostridium sp. CAG:465	0.131535	3.38818e-06	0.0036735	BMI, Age, gender, usual stool type
Dietary	Fresh fruit, berries	k__Bacteria;p__Actinobacteria;c__Actinobacteria;o__Bifidobacteriales;f__Bifidobacteriaceae;g__Bifidobacterium;s__Bifidobacterium bifidum	-0.0612468	3.34107e-06	0.00368136	BMI, Age, gender, usual stool type
Dietary	Fresh fruit, berries	k__Bacteria;p__Proteobacteria;c__Betaproteobacteria;o__Burkholderiales;f__Burkholderiaceae;g__Burkholderia;s__Burkholderia pseudomallei	-0.0389563	3.42096e-06	0.003773	BMI, Age, gender, usual stool type
Dietary	Fresh fruit, berries	k__Bacteria;p__Proteobacteria;c__Deltaproteobacteria;o__Desulfovibrionales;f__Desulfovibrionaceae;g__Unclassified;s__Desulfovibrionaceae bacterium	-0.12543	3.64188e-06	0.0040036	BMI, Age, gender, usual stool type
Dietary	Fresh fruit, berries	k__Bacteria;p__Bacteroidetes;c__Bacteroidia;o__Bacteroidales;f__Bacteroidaceae;g__Bacteroides;s__Bacteroides sp. CAG:875	-0.0757075	3.69818e-06	0.00406896	BMI, Age, gender, usual stool type
Dietary	Fresh fruit, berries	k__Bacteria;p__Bacteroidetes;c__Bacteroidia;o__Bacteroidales;f__Bacteroidaceae;g__Bacteroides;s__Bacteroides fluxus	-0.0729125	3.7392e-06	0.0041129	BMI, Age, gender, usual stool type
Dietary	Fresh fruit, berries	k__Bacteria;p__Proteobacteria;c__Betaproteobacteria;o__Burkholderiales;f__Burkholderiaceae;g__Burkholderia;s__Burkholderia cenocepacia	-0.0468537	3.87767e-06	0.00424691	BMI, Age, gender, usual stool type
Dietary	Fresh fruit, berries	k__Bacteria;p__Bacteroidetes;c__Bacteroidia;o__Bacteroidales;f__Bacteroidaceae;g__Bacteroides;s__Bacteroides stercoris CAG:120	-0.0736229	3.91421e-06	0.00429809	BMI, Age, gender, usual stool type
Dietary	Fresh fruit, berries	k__Bacteria;p__Proteobacteria;c__Betaproteobacteria;o__Neisseriales;f__Neisseriaceae;g__Neisseria;s__Neisseria sp. HMSC06F02	-0.0378835	4.3666e-06	0.0047446	BMI, Age, gender, usual stool type
Dietary	Fresh fruit, berries	k__Bacteria;p__Bacteroidetes;c__Flavobacteriia;o__Flavobacteriales;f__Flavobacteriaceae;g__Ornithobacterium;s__Ornithobacterium rhinotracheale	-0.0681809	4.36207e-06	0.00476648	BMI, Age, gender, usual stool type
Dietary	Fresh fruit, berries	k__Bacteria;p__Tenericutes;c__Mollicutes;o__Anaeroplasmatales;f__Anaeroplasmataceae;g__Anaeroplasma;s__Anaeroplasma bactoclasticum	0.15334	4.54152e-06	0.00483439	BMI, Age, gender, usual stool type
Dietary	Fresh fruit, berries	k__Bacteria;p__Bacteroidetes;c__Bacteroidia;o__Bacteroidales;f__Prevotellaceae;g__Prevotella;s__Prevotella sp. CAG:1058	-0.0729614	4.42443e-06	0.00483491	BMI, Age, gender, usual stool type
Dietary	Fresh fruit, berries	k__Bacteria;p__Tenericutes;c__Mollicutes;o__Mycoplasmatales;f__Mycoplasmataceae;g__Mycoplasma;s__Mycoplasma sp. CAG:776	0.175489	4.58403e-06	0.00489276	BMI, Age, gender, usual stool type
Dietary	Fresh fruit, berries	k__Bacteria;p__Bacteroidetes;c__Bacteroidia;o__Bacteroidales;f__Bacteroidaceae;g__Bacteroides;s__Bacteroides thetaiotaomicron CAG:40	-0.0808364	4.53649e-06	0.00495229	BMI, Age, gender, usual stool type
Dietary	Fresh fruit, berries	k__Bacteria;p__Firmicutes;c__Clostridia;o__Clostridiales;f__Clostridiaceae;g__Clostridium;s__Clostridium sp. 26_21	0.160072	4.86282e-06	0.00499416	BMI, Age, gender, usual stool type
Dietary	Fresh fruit, berries	k__Bacteria;p__Bacteroidetes;c__Bacteroidia;o__Bacteroidales;f__Bacteroidaceae;g__Bacteroides;s__Bacteroides fragilis	-0.0763171	4.57584e-06	0.00499675	BMI, Age, gender, usual stool type
Dietary	Fresh fruit, berries	k__Bacteria;p__Actinobacteria;c__Actinobacteria;o__Bifidobacteriales;f__Bifidobacteriaceae;g__Bifidobacterium;s__Bifidobacterium adolescentis CAG:119	-0.0499094	4.61261e-06	0.00502451	BMI, Age, gender, usual stool type
Dietary	Fresh fruit, berries	k__Bacteria;p__Bacteroidetes;c__Bacteroidia;o__Bacteroidales;f__Rikenellaceae;g__Rikenella;s__Rikenella microfusus	-0.0770266	4.83634e-06	0.00525543	BMI, Age, gender, usual stool type
Dietary	Fresh fruit, berries	k__Bacteria;p__Bacteroidetes;c__Bacteroidia;o__Bacteroidales;f__Bacteroidaceae;g__Bacteroides;s__Bacteroides ovatus CAG:22	-0.0745692	4.92784e-06	0.00536313	BMI, Age, gender, usual stool type
Dietary	Fresh fruit, berries	k__Bacteria;p__Bacteroidetes;c__Bacteroidia;o__Bacteroidales;f__Bacteroidaceae;g__Bacteroides;s__Bacteroides cellulosilyticus	-0.0965675	4.9779e-06	0.0054158	BMI, Age, gender, usual stool type
Dietary	Fresh fruit, berries	k__Bacteria;p__Firmicutes;c__Erysipelotrichia;o__Erysipelotrichales;f__Erysipelotrichaceae;g__Coprobacillus;s__Coprobacillus sp. CAG:605	0.194106	5.42071e-06	0.0056877	BMI, Age, gender, usual stool type
Dietary	Fresh fruit, berries	k__Bacteria;p__Bacteroidetes;c__Bacteroidia;o__Bacteroidales;f__Bacteroidaceae;g__Bacteroides;s__Bacteroides fragilis CAG:558	-0.06959	5.31163e-06	0.00576208	BMI, Age, gender, usual stool type
Dietary	Fresh fruit, berries	k__Bacteria;p__Bacteroidetes;c__Bacteroidia;o__Bacteroidales;f__Rikenellaceae;g__Alistipes;s__Alistipes sp. CAG:268	-0.0674207	5.36309e-06	0.00581678	BMI, Age, gender, usual stool type
Dietary	Fresh fruit, berries	k__Bacteria;p__Bacteroidetes;c__Bacteroidia;o__Bacteroidales;f__Bacteroidaceae;g__Bacteroides;s__Bacteroides sp. CAG:633	-0.0645696	5.72099e-06	0.00618886	BMI, Age, gender, usual stool type
Dietary	Fresh fruit, berries	k__Bacteria;p__Proteobacteria;c__Betaproteobacteria;o__Unclassified;f__Unclassified;g__Candidatus Accumulibacter;s__Candidatus Accumulibacter sp. SK-11	-0.0377245	5.99697e-06	0.00646231	BMI, Age, gender, usual stool type
Dietary	Fresh fruit, berries	k__Bacteria;p__Firmicutes;c__Clostridia;o__Clostridiales;f__Oscillospiraceae;g__Unclassified;s__Oscillospiraceae bacterium VE202-24	-0.0583006	6.23313e-06	0.00666962	BMI, Age, gender, usual stool type
Dietary	Fresh fruit, berries	k__Bacteria;p__Proteobacteria;c__Gammaproteobacteria;o__Enterobacterales;f__Enterobacteriaceae;g__Citrobacter;s__Citrobacter koseri	-0.0628079	6.20963e-06	0.0066777	BMI, Age, gender, usual stool type
Dietary	Fresh fruit, berries	k__Bacteria;p__Bacteroidetes;c__Bacteroidia;o__Bacteroidales;f__Rikenellaceae;g__Alistipes;s__Alistipes sp. CAG:157	-0.0621562	6.43336e-06	0.00692556	BMI, Age, gender, usual stool type
Dietary	Fresh fruit, berries	k__Bacteria;p__Bacteroidetes;c__Bacteroidia;o__Bacteroidales;f__Prevotellaceae;g__Prevotella;s__Prevotella sp. CAG:924	-0.0773505	6.46913e-06	0.00696252	BMI, Age, gender, usual stool type
Dietary	Fresh fruit, berries	k__Bacteria;p__Firmicutes;c__Clostridia;o__Clostridiales;f__Clostridiaceae;g__Clostridium;s__Clostridium sp. CAG:43	-0.0464124	6.65658e-06	0.00715136	BMI, Age, gender, usual stool type
Dietary	Fresh fruit, berries	k__Bacteria;p__Bacteroidetes;c__Bacteroidia;o__Bacteroidales;f__Bacteroidaceae;g__Bacteroides;s__Bacteroides fragilis CAG:47	-0.0729184	6.8035e-06	0.00730366	BMI, Age, gender, usual stool type
Dietary	Fresh fruit, berries	k__Bacteria;p__Firmicutes;c__Erysipelotrichia;o__Erysipelotrichales;f__Erysipelotrichaceae;g__Coprobacillus;s__Coprobacillus sp. CAG:698	0.179758	7.36035e-06	0.00762617	BMI, Age, gender, usual stool type
Dietary	Fresh fruit, berries	k__Bacteria;p__Firmicutes;c__Clostridia;o__Clostridiales;f__Clostridiaceae;g__Clostridium;s__Clostridium sp. CAG:470	0.138206	7.17701e-06	0.0076276	BMI, Age, gender, usual stool type
Dietary	Fresh fruit, berries	k__Bacteria;p__Bacteroidetes;c__Bacteroidia;o__Bacteroidales;f__Unclassified;g__Unclassified;s__Bacteroidales bacterium Barb6XT	-0.064557	7.27352e-06	0.00778516	BMI, Age, gender, usual stool type
Dietary	Fresh fruit, berries	k__Bacteria;p__Bacteroidetes;c__Bacteroidia;o__Bacteroidales;f__Bacteroidaceae;g__Bacteroides;s__Bacteroides sp. An19	-0.0942064	7.31446e-06	0.00782217	BMI, Age, gender, usual stool type
Dietary	Fresh fruit, berries	k__Bacteria;p__Firmicutes;c__Clostridia;o__Clostridiales;f__Clostridiaceae;g__Clostridium;s__Clostridium sp. CAG:12237_41	0.10865	7.53493e-06	0.00787103	BMI, Age, gender, usual stool type
Dietary	Fresh fruit, berries	k__Bacteria;p__Bacteroidetes;c__Bacteroidia;o__Bacteroidales;f__Bacteroidaceae;g__Bacteroides;s__Bacteroides faecichinchillae	-0.0697272	7.39635e-06	0.00791296	BMI, Age, gender, usual stool type
Dietary	Fresh fruit, berries	k__Bacteria;p__Firmicutes;c__Clostridia;o__Clostridiales;f__Clostridiaceae;g__Clostridium;s__Clostridium sp. CAG:780	0.152272	7.88358e-06	0.00824937	BMI, Age, gender, usual stool type
Dietary	Fresh fruit, berries	k__Bacteria;p__Bacteroidetes;c__Bacteroidia;o__Bacteroidales;f__Bacteroidaceae;g__Bacteroides;s__Bacteroides faecis CAG:32	-0.074913	7.80197e-06	0.00832626	BMI, Age, gender, usual stool type
Dietary	Fresh fruit, berries	k__Bacteria;p__Firmicutes;c__Clostridia;o__Clostridiales;f__Clostridiaceae;g__Clostridium;s__Clostridium sp. CAG:269	0.191245	8.17715e-06	0.00848953	BMI, Age, gender, usual stool type
Dietary	Fresh fruit, berries	k__Bacteria;p__Bacteroidetes;c__Bacteroidia;o__Bacteroidales;f__Bacteroidaceae;g__Bacteroides;s__Bacteroides coprophilus CAG:333	-0.0863876	7.96391e-06	0.00849111	BMI, Age, gender, usual stool type
Dietary	Fresh fruit, berries	k__Bacteria;p__Bacteroidetes;c__Bacteroidia;o__Bacteroidales;f__Bacteroidaceae;g__Bacteroides;s__Bacteroides intestinalis CAG:564	-0.0724286	7.9934e-06	0.00851963	BMI, Age, gender, usual stool type
Dietary	Fresh fruit, berries	k__Bacteria;p__Bacteroidetes;c__Bacteroidia;o__Bacteroidales;f__Bacteroidaceae;g__Bacteroides;s__Bacteroides caccae CAG:21	-0.0678815	8.09804e-06	0.00862739	BMI, Age, gender, usual stool type
Dietary	Fresh fruit, berries	k__Bacteria;p__Firmicutes;c__Clostridia;o__Clostridiales;f__Eubacteriaceae;g__Eubacterium;s__[Eubacterium] eligens	0.0820011	8.63444e-06	0.00917209	BMI, Age, gender, usual stool type
Dietary	Fresh fruit, berries	k__Bacteria;p__Proteobacteria;c__Betaproteobacteria;o__Burkholderiales;f__Comamonadaceae;g__Variovorax;s__Variovorax sp. WDL1	-0.0591443	8.69595e-06	0.00920692	BMI, Age, gender, usual stool type
Dietary	Fresh fruit, berries	k__Bacteria;p__Bacteroidetes;c__Bacteroidia;o__Bacteroidales;f__Tannerellaceae;g__Parabacteroides;s__Parabacteroides sp. merdae-related_45_40	-0.123818	8.79512e-06	0.00922455	BMI, Age, gender, usual stool type
Dietary	Fresh fruit, berries	k__Bacteria;p__Firmicutes;c__Unclassified;o__Unclassified;f__Unclassified;g__Unclassified;s__Firmicutes bacterium CAG:449	0.134039	8.80437e-06	0.00930948	BMI, Age, gender, usual stool type
Dietary	Fresh fruit, berries	k__Bacteria;p__Proteobacteria;c__Gammaproteobacteria;o__Vibrionales;f__Vibrionaceae;g__Vibrio;s__Vibrio cholerae	-0.0468456	8.8811e-06	0.00941151	BMI, Age, gender, usual stool type
Dietary	Fresh fruit, berries	k__Bacteria;p__Bacteroidetes;c__Bacteroidia;o__Bacteroidales;f__Bacteroidaceae;g__Bacteroides;s__Bacteroides ndongoniae	-0.0925299	9.06065e-06	0.0095993	BMI, Age, gender, usual stool type
Dietary	Fresh fruit, berries	k__Bacteria;p__Firmicutes;c__Clostridia;o__Clostridiales;f__Oscillospiraceae;g__Oscillibacter;s__Oscillibacter sp. PEA192	-0.0567676	9.09022e-06	0.00963122	BMI, Age, gender, usual stool type
Dietary	Fresh fruit, berries	k__Bacteria;p__Firmicutes;c__Clostridia;o__Clostridiales;f__Clostridiaceae;g__Clostridium;s__Clostridium sp. CAG:510	0.104684	9.34724e-06	0.00988991	BMI, Age, gender, usual stool type
Dietary	Fresh fruit, berries	k__Bacteria;p__Firmicutes;c__Clostridia;o__Thermoanaerobacterales;f__Thermoanaerobacteraceae;g__Moorella;s__Moorella thermoacetica	-0.0336971	9.76728e-06	0.010311	BMI, Age, gender, usual stool type
Dietary	Fresh fruit, berries	k__Bacteria;p__Bacteroidetes;c__Bacteroidia;o__Bacteroidales;f__Prevotellaceae;g__Prevotella;s__Prevotella saccharolytica	-0.0576819	1.05215e-05	0.0110787	BMI, Age, gender, usual stool type
Dietary	Fresh fruit, berries	k__Bacteria;p__Firmicutes;c__Clostridia;o__Clostridiales;f__Clostridiaceae;g__Clostridium;s__Clostridium sp. CAG:1193	0.195591	1.07401e-05	0.0112104	BMI, Age, gender, usual stool type
Dietary	Fresh fruit, berries	k__Bacteria;p__Firmicutes;c__Clostridia;o__Clostridiales;f__Lachnospiraceae;g__Roseburia;s__Roseburia sp. CAG:100	0.0947088	1.06626e-05	0.0112144	BMI, Age, gender, usual stool type
Dietary	Fresh fruit, berries	k__Bacteria;p__Bacteroidetes;c__Bacteroidia;o__Bacteroidales;f__Bacteroidaceae;g__Bacteroides;s__Bacteroides salanitronis	-0.0891035	1.12186e-05	0.0117477	BMI, Age, gender, usual stool type
Dietary	Fresh fruit, berries	k__Bacteria;p__Bacteroidetes;c__Bacteroidia;o__Bacteroidales;f__Prevotellaceae;g__Alloprevotella;s__Prevotella sp. oral taxon 473	-0.0616296	1.14525e-05	0.0118933	BMI, Age, gender, usual stool type
Dietary	Fresh fruit, berries	k__Bacteria;p__Actinobacteria;c__Actinobacteria;o__Bifidobacteriales;f__Bifidobacteriaceae;g__Bifidobacterium;s__Bifidobacterium animalis	-0.0383297	1.13431e-05	0.0118942	BMI, Age, gender, usual stool type
Dietary	Fresh fruit, berries	k__Bacteria;p__Firmicutes;c__Clostridia;o__Clostridiales;f__Clostridiaceae;g__Clostridium;s__Clostridium sp. CAG:277	0.10545	1.20785e-05	0.012592	BMI, Age, gender, usual stool type
Dietary	Fresh fruit, berries	k__Bacteria;p__Actinobacteria;c__Actinobacteria;o__Micrococcales;f__Micrococcaceae;g__Rothia;s__Rothia mucilaginosa	-0.0363724	1.21777e-05	0.0127461	BMI, Age, gender, usual stool type
Dietary	Fresh fruit, berries	k__Bacteria;p__Proteobacteria;c__Alphaproteobacteria;o__Rhizobiales;f__Rhizobiaceae;g__Agrobacterium;s__Agrobacterium deltaense	-0.0443185	1.27695e-05	0.0132893	BMI, Age, gender, usual stool type
Dietary	Fresh fruit, berries	k__Bacteria;p__Bacteroidetes;c__Bacteroidia;o__Bacteroidales;f__Porphyromonadaceae;g__Porphyromonas;s__Porphyromonas crevioricanis	-0.0711611	1.29268e-05	0.0134706	BMI, Age, gender, usual stool type
Dietary	Fresh fruit, berries	k__Bacteria;p__Bacteroidetes;c__Bacteroidia;o__Bacteroidales;f__Tannerellaceae;g__Parabacteroides;s__Parabacteroides sp. CAG:2	-0.073591	1.30253e-05	0.0135899	BMI, Age, gender, usual stool type
Dietary	Fresh fruit, berries	k__Bacteria;p__Proteobacteria;c__Alphaproteobacteria;o__Rhizobiales;f__Rhizobiaceae;g__Agrobacterium;s__Agrobacterium tumefaciens	-0.0493226	1.34693e-05	0.0136334	BMI, Age, gender, usual stool type
Dietary	Fresh fruit, berries	k__Bacteria;p__Bacteroidetes;c__Bacteroidia;o__Bacteroidales;f__Porphyromonadaceae;g__Porphyromonas;s__Porphyromonas gingivalis	-0.0550297	1.34688e-05	0.0140299	BMI, Age, gender, usual stool type
Dietary	Fresh fruit, berries	k__Bacteria;p__Proteobacteria;c__Gammaproteobacteria;o__Pseudomonadales;f__Pseudomonadaceae;g__Pseudomonas;s__Pseudomonas chlororaphis	-0.0869784	1.36411e-05	0.0141814	BMI, Age, gender, usual stool type
Dietary	Fresh fruit, berries	k__Bacteria;p__Firmicutes;c__Clostridia;o__Clostridiales;f__Lachnospiraceae;g__Roseburia;s__Roseburia sp. 831b	0.0559332	1.38217e-05	0.0143382	BMI, Age, gender, usual stool type
Dietary	Fresh fruit, berries	k__Bacteria;p__Proteobacteria;c__Gammaproteobacteria;o__Enterobacterales;f__Enterobacteriaceae;g__Enterobacter;s__Enterobacter cloacae	-0.0388822	1.39641e-05	0.0145283	BMI, Age, gender, usual stool type
Dietary	Fresh fruit, berries	k__Bacteria;p__Bacteroidetes;c__Bacteroidia;o__Bacteroidales;f__Bacteroidaceae;g__Bacteroides;s__Bacteroides finegoldii CAG:203	-0.0670678	1.43355e-05	0.0148952	BMI, Age, gender, usual stool type
Dietary	Fresh fruit, berries	k__Bacteria;p__Bacteroidetes;c__Bacteroidia;o__Bacteroidales;f__Bacteroidaceae;g__Bacteroides;s__Bacteroides sp. 1_1_30	-0.0825073	1.47395e-05	0.0152848	BMI, Age, gender, usual stool type
Dietary	Fresh fruit, berries	k__Bacteria;p__Bacteroidetes;c__Bacteroidia;o__Bacteroidales;f__Bacteroidaceae;g__Bacteroides;s__Bacteroides sp. 3_1_23	-0.0728457	1.58995e-05	0.0164361	BMI, Age, gender, usual stool type
Dietary	Fresh fruit, berries	k__Eukaryota;p__Streptophyta;c__Unclassified;o__Malvales;f__Malvaceae;g__Corchorus;s__Corchorus olitorius	-0.0406845	1.60544e-05	0.0165775	BMI, Age, gender, usual stool type
Dietary	Fresh fruit, berries	k__Bacteria;p__Bacteroidetes;c__Bacteroidia;o__Bacteroidales;f__Tannerellaceae;g__Parabacteroides;s__Parabacteroides gordonii	-0.0756386	1.63482e-05	0.0168403	BMI, Age, gender, usual stool type
Dietary	Fresh fruit, berries	k__Bacteria;p__Bacteroidetes;c__Bacteroidia;o__Bacteroidales;f__Barnesiellaceae;g__Coprobacter;s__Coprobacter secundus	-0.0601827	1.63597e-05	0.0168906	BMI, Age, gender, usual stool type
Dietary	Fresh fruit, berries	k__Bacteria;p__Firmicutes;c__Clostridia;o__Clostridiales;f__Lachnospiraceae;g__Roseburia;s__Roseburia sp. CAG:380	0.089371	1.65557e-05	0.0170707	BMI, Age, gender, usual stool type
Dietary	Fresh fruit, berries	k__Bacteria;p__Bacteroidetes;c__Bacteroidia;o__Bacteroidales;f__Prevotellaceae;g__Prevotella;s__Prevotella sp. CAG:617	-0.0746368	1.65596e-05	0.0170896	BMI, Age, gender, usual stool type
Dietary	Fresh fruit, berries	k__Bacteria;p__Proteobacteria;c__Gammaproteobacteria;o__Pseudomonadales;f__Pseudomonadaceae;g__Pseudomonas;s__Pseudomonas amygdali	-0.0429972	1.68069e-05	0.0173046	BMI, Age, gender, usual stool type
Dietary	Fresh fruit, berries	k__Eukaryota;p__Ascomycota;c__Sordariomycetes;o__Hypocreales;f__Cordycipitaceae;g__Beauveria;s__Beauveria bassiana	-0.0342388	1.71298e-05	0.0176318	BMI, Age, gender, usual stool type
Dietary	Fresh fruit, berries	k__Bacteria;p__Bacteroidetes;c__Cytophagia;o__Cytophagales;f__Flammeovirgaceae;g__Cesiribacter;s__Cesiribacter andamanensis	-0.0570529	1.71383e-05	0.0176477	BMI, Age, gender, usual stool type
Dietary	Fresh fruit, berries	k__Bacteria;p__Tenericutes;c__Mollicutes;o__Acholeplasmatales;f__Acholeplasmataceae;g__Acholeplasma;s__Acholeplasma sp. CAG:878	0.183268	1.73786e-05	0.0177464	BMI, Age, gender, usual stool type
Dietary	Fresh fruit, berries	k__Bacteria;p__Actinobacteria;c__Actinobacteria;o__Streptomycetales;f__Streptomycetaceae;g__Streptomyces;s__Streptomyces sp. HCCB10043	-0.0490902	1.73684e-05	0.0178163	BMI, Age, gender, usual stool type
Dietary	Fresh fruit, berries	k__Bacteria;p__Bacteroidetes;c__Bacteroidia;o__Bacteroidales;f__Tannerellaceae;g__Parabacteroides;s__Parabacteroides sp. AM08-6	-0.0921512	1.83648e-05	0.0186575	BMI, Age, gender, usual stool type
Dietary	Fresh fruit, berries	k__Bacteria;p__Bacteroidetes;c__Bacteroidia;o__Bacteroidales;f__Bacteroidaceae;g__Bacteroides;s__Bacteroides intestinalis CAG:315	-0.0735973	1.83286e-05	0.0188233	BMI, Age, gender, usual stool type
Dietary	Fresh fruit, berries	k__Bacteria;p__Bacteroidetes;c__Bacteroidia;o__Bacteroidales;f__Bacteroidaceae;g__Bacteroides;s__Bacteroides sartorii	-0.0801554	1.90699e-05	0.0195526	BMI, Age, gender, usual stool type
Dietary	Fresh fruit, berries	k__Bacteria;p__Proteobacteria;c__Gammaproteobacteria;o__Enterobacterales;f__Enterobacteriaceae;g__Shigella;s__Shigella flexneri	-0.0718274	1.90887e-05	0.0195633	BMI, Age, gender, usual stool type
Dietary	Fresh fruit, berries	k__Bacteria;p__Actinobacteria;c__Actinobacteria;o__Bifidobacteriales;f__Bifidobacteriaceae;g__Bifidobacterium;s__Bifidobacterium bifidum CAG:234	-0.0411625	2.15742e-05	0.0218236	BMI, Age, gender, usual stool type
Dietary	Fresh fruit, berries	k__Bacteria;p__Firmicutes;c__Clostridia;o__Clostridiales;f__Clostridiaceae;g__Clostridium;s__Clostridium sp. CAG:302	0.175749	2.20207e-05	0.022258	BMI, Age, gender, usual stool type
Dietary	Fresh fruit, berries	k__Bacteria;p__Actinobacteria;c__Actinobacteria;o__Corynebacteriales;f__Nocardiaceae;g__Rhodococcus;s__Rhodococcus ruber	-0.033447	2.22266e-05	0.0225719	BMI, Age, gender, usual stool type
Dietary	Fresh fruit, berries	k__Bacteria;p__Firmicutes;c__Clostridia;o__Clostridiales;f__Clostridiaceae;g__Clostridium;s__Clostridium sp. CAG:590	0.10464	2.23481e-05	0.0226517	BMI, Age, gender, usual stool type
Dietary	Fresh fruit, berries	k__Bacteria;p__Firmicutes;c__Clostridia;o__Clostridiales;f__Clostridiaceae;g__Clostridium;s__Clostridium sp. CAG:253	0.131119	2.2416e-05	0.0226839	BMI, Age, gender, usual stool type
Dietary	Fresh fruit, berries	k__Bacteria;p__Bacteroidetes;c__Bacteroidia;o__Bacteroidales;f__Bacteroidaceae;g__Bacteroides;s__Bacteroides sp. CAG:144	-0.0734124	2.23446e-05	0.0227563	BMI, Age, gender, usual stool type
Dietary	Fresh fruit, berries	k__Bacteria;p__Proteobacteria;c__Betaproteobacteria;o__Burkholderiales;f__Unclassified;g__Methylibium;s__Methylibium sp. T29	-0.0443984	2.35713e-05	0.0238704	BMI, Age, gender, usual stool type
Dietary	Fresh fruit, berries	k__Bacteria;p__Bacteroidetes;c__Bacteroidia;o__Bacteroidales;f__Prevotellaceae;g__Prevotella;s__Prevotella sp. CAG:485	-0.0502022	2.36993e-05	0.0240596	BMI, Age, gender, usual stool type
Dietary	Fresh fruit, berries	k__Bacteria;p__Bacteroidetes;c__Bacteroidia;o__Bacteroidales;f__Bacteroidaceae;g__Bacteroides;s__Bacteroides sp. CAG:189	-0.0688752	2.54766e-05	0.0257688	BMI, Age, gender, usual stool type
Dietary	Fresh fruit, berries	k__Bacteria;p__Bacteroidetes;c__Bacteroidia;o__Bacteroidales;f__Bacteroidaceae;g__Bacteroides;s__Bacteroides pyogenes	-0.0639233	2.59677e-05	0.026256	BMI, Age, gender, usual stool type
Dietary	Fresh fruit, berries	k__Bacteria;p__Proteobacteria;c__Gammaproteobacteria;o__Enterobacterales;f__Enterobacteriaceae;g__Klebsiella;s__Klebsiella pneumoniae	-0.0685972	2.61472e-05	0.0264468	BMI, Age, gender, usual stool type
Dietary	Fresh fruit, berries	k__Bacteria;p__Bacteroidetes;c__Bacteroidia;o__Bacteroidales;f__Bacteroidaceae;g__Bacteroides;s__Bacteroides sp. AM37-9	-0.102608	2.64115e-05	0.0265106	BMI, Age, gender, usual stool type
Dietary	Fresh fruit, berries	k__Bacteria;p__Firmicutes;c__Clostridia;o__Clostridiales;f__Lachnospiraceae;g__Dorea;s__Dorea longicatena	-0.0455033	2.70901e-05	0.0273443	BMI, Age, gender, usual stool type
Dietary	Fresh fruit, berries	k__Bacteria;p__Firmicutes;c__Clostridia;o__Clostridiales;f__Clostridiaceae;g__Clostridium;s__Clostridium sp. CAG:628	0.221667	2.94928e-05	0.02938	BMI, Age, gender, usual stool type
Dietary	Fresh fruit, berries	k__Bacteria;p__Proteobacteria;c__Betaproteobacteria;o__Burkholderiales;f__Oxalobacteraceae;g__Unclassified;s__Oxalobacteraceae bacterium IMCC9480	-0.0564863	2.98822e-05	0.0299142	BMI, Age, gender, usual stool type
Dietary	Fresh fruit, berries	k__Bacteria;p__Bacteroidetes;c__Bacteroidia;o__Bacteroidales;f__Bacteroidaceae;g__Bacteroides;s__Bacteroides helcogenes	-0.0801425	2.99128e-05	0.0299744	BMI, Age, gender, usual stool type
Dietary	Fresh fruit, berries	k__Bacteria;p__Bacteroidetes;c__Bacteroidia;o__Bacteroidales;f__Bacteroidaceae;g__Bacteroides;s__Bacteroides sp. 9_1_42FAA	-0.0639938	3.06503e-05	0.0307316	BMI, Age, gender, usual stool type
Dietary	Fresh fruit, berries	k__Bacteria;p__Bacteroidetes;c__Bacteroidia;o__Bacteroidales;f__Bacteroidaceae;g__Bacteroides;s__Bacteroides uniformis CAG:3	-0.0731962	3.20392e-05	0.0320532	BMI, Age, gender, usual stool type
Dietary	Fresh fruit, berries	k__Bacteria;p__Bacteroidetes;c__Bacteroidia;o__Bacteroidales;f__Porphyromonadaceae;g__Porphyromonas;s__Porphyromonas sp. 31_2	-0.0812593	3.21861e-05	0.0321487	BMI, Age, gender, usual stool type
Dietary	Fresh fruit, berries	k__Bacteria;p__Firmicutes;c__Clostridia;o__Clostridiales;f__Lachnospiraceae;g__Unclassified;s__Lachnospiraceae bacterium GAM79	0.0756492	3.3609e-05	0.0334553	BMI, Age, gender, usual stool type
Dietary	Fresh fruit, berries	k__Bacteria;p__Firmicutes;c__Unclassified;o__Unclassified;f__Unclassified;g__Unclassified;s__Firmicutes bacterium CAG:313	0.198624	3.38612e-05	0.0335726	BMI, Age, gender, usual stool type
[truncated: 63 more rows]

## Sheet: MWAS_KEGGko
factor_group	factor_name	feature	Pathways	Sub-pathways	Metabolic pathways	Estimate	p.value	FDR	adjusted
[truncated: 1,269 more rows]
